# Supplementary material for: Microtubules restrict F-actin polymerization to the immune synapse via GEF-H1 to maintain polarity in lymphocytes
Source: eLife journal article supplement (doi:10.7554/elife.78330), 2022-09-16
Supplement: supp [file Figure1_FigureSupplement1A.xlsx]

## Sheet: Feuil1
Enrichment in EXOC7 at the immune synapse (within 1µm/total)
0-5min	45min
0.129	0.179
0.175	0.217
0.117	0.177
0.207	0.184
0.151	0.172
0.155	0.123
0.095	0.236
0.271	0.309
0.291	0.209
0.191	0.252
0.212	0.194
0.076	0.158
0.103	0.174
0.122	0.171
0.147	0.231
0.208
0.114	0.095
0.232	0.175
0.091	0.158
0.146	0.247
0.072	0.199
0.096	0.155
0.067	0.195
0.073	0.205
0.098	0.16
0.09	0.096
	0.132
	0.098
	0.177
	0.061
	0.182
