# Supplementary material for: Microtubules restrict F-actin polymerization to the immune synapse via GEF-H1 to maintain polarity in lymphocytes
Source: eLife journal article supplement (doi:10.7554/elife.78330), 2022-09-16
Supplement: supp [file Figure1_FigureSupplement1C.xlsx]

## Sheet: Feuil1
Antigen Recruitment by primary B cells
Time (min)	BSA									aIgM
0	1	1	1	1	1	1	1			1	1	1	1	1	1	1	1	1	1	1	1	1	1
0.75	0.979003	1.02614	0.845555	0.979275	0.990099	1.13833	0.952995			2.37542	1.04562	0.821851	1.52328	1.17062	1.36941	0.534508	1.23553	0.983926	0.965547	1.15556	1.00394	1.01288	1.28336
1.5	0.985127	1.08497	0.918235	0.962003	1.0243	1.12863	0.946171			3.27862	1.2415	0.837161	0.733058	0.929639	1.33453	0.772883	1.25456	1.08291	1.04823	1.32947	1.15256	1.10628	1.43241
2.25	0.950131	1.06863	0.868916	1.03022	1.0045	1.16916	0.98787			0.970539	1.40519	0.956855	1.36123	0.970097	1.44454	0.677435	1.22125	1.08037	1.18088	1.63865	1.35728	1.04831	1.52426
3	1.00612	1.01225	0.847502	0.968912	0.9955	1.09075	0.940864			1.10774	1.59481	0.92206	0.852092	0.980651	1.51699	0.760646	1.28152	1.05753	1.32214	1.53816	1.15551	1.19646	1.48267
3.75	0.936133	1.06863	0.879948	1.00345	1.0387	1.12599	0.952237			1.04798	1.58229	1.74043	1.50324	0.977133	1.47406	0.789525	1.30373	1.19205	1.37726	1.69855	1.21358	1.23994	1.54073
4.5	0.967629	0.956699	0.809864	1.08117	1.07471	1.19207	1.07506			1.1936	1.56977	0.634656	0.901002	0.988566	1.54919	0.749878	1.37272	1.19797	1.34281	1.69372	2.00886	1.22383	1.57799
5.25	0.961505	1.03268	0.809864	1.02763	1.0297	1.1489	0.742229			0.748317	1.4839	0.823939	0.868592	1.04573	1.55993	0.884484	1.27914	1.0643	1.28941	1.58068	1.7126	1.30354	1.46187
6	1.03762	1.00082	1.03115	1.05872	0.9991	1.08106				1.29545	1.73077	0.98817	1.01237	1.00264	1.5653	0.675477	1.40761	1.00423	1.31783	1.53816	1.34646	1.53301	1.51127
6.75	0.969379	1.07761	0.783258	1.04491	0.994599	1.14361				1.1633	1.63685	0.87126	0.948144	1.11697	1.10733	0.829173	1.25694	1.42386	1.32903	1.51498	1.36417	1.25523	1.42808
7.5	0.988626	1.0817	0.791694	1.03972	1.0297	1.0511				0.647306	1.64222	0.409882	0.981732	1.04573	1.51789	0.716104	1.31007	1.36294	1.54866	1.61159	1.29823	1.3591	1.45667
8.25	1.02362	1.04984	0.811811	1.23834	1.0054	1.0696				1.70202	1.41055	0.845511	0.925751	0.985048	1.61181	0.794909	0.9659	1.41455	1.23428	1.55652	1.29429	1.53221	1.06153
9	1.01487	1.0098	0.780662	1.22453	1.07741	1.08899				1.15488	1.33721	0.819763	0.783736	1.11258	1.39267	0.824278	0.993656	0.979695	1.5211	1.59903	1.22343	1.41385	1.16811
9.75	0.995626	1.0531	0.870863	1.2487	1.0171					2.5665	1.36315	0.538622	0.789039	1.26473	1.52862	0.724914	1.00872	0.984772	1.48062	1.76715	1.31594	1.40741	1.29636
10.5	1.06387	1.0817	0.802725	1.22107	1.0063					0.784512	1.24329	0.725122		0.766051	1.50268	0.725893	1.01665	1.66667	1.39363	1.6599	1.29035	1.49356	0.973137
																			1.22911
