# Supplementary material for: Microtubules restrict F-actin polymerization to the immune synapse via GEF-H1 to maintain polarity in lymphocytes
Source: eLife journal article supplement (doi:10.7554/elife.78330), 2022-09-16
Supplement: supp [file Figure1_FigureSupplement1E.xlsx]

## Sheet: Feuil1
LifeAct-GFP enrichment at the immune synapse of primary B cells (2µm/total / t0)
Time (min)	BSA					aIgM
0	1	1	1			1	1	1	1	1	1	1	1	1	1	1	1	1	1	1	1	1
0.75	1.04865	0.950413	0.928571			0.971564	1.07692	3.27848	1.76027	0.871795	1.61502	2.04545	2.5	3.54651	1.43655	1.13127	1.19383	0.996835	1.07383	1.00515	1.22289	1.26515
1.5	1.00541	1.04132	1.11607			0.853081	1.35043	1.83544	1.29452	0.64359	1.64319	1.86364	2.73529	2.98837	1.66497	1.18919	1.4185	0.85443	1.16107	1.02062	1.40361	1.05051
2.25	0.940541	1.00826	0.973214			0.620853	1.22222	1.5443	1.16438	0.692308	1.12207	2.18182	2.72059	2.5814	1.50761	1.04633	1.35242	0.898734	0.838926	1.02062	1.28916	0.883838
3	1.22162	0.892562	1.1875			0.56872	1.21368	1.60759	1.00685	0.635897	1.32394	3.29545	2.58824	2.69767	1.43147	0.440154	1.27753	1.26582	1.03356	1.00515	1.26506	0.964646
3.75	0.978378	0.867769	0.973214			0.635071	1.11966	1.68354	0.993151	0.648718	1.47887	4.56818	2.38235	2.82558	1.50254	0.532819	1.54185	1.0443	0.704698	0.984536	1.14458	0.909091
4.5	0.243243	0.966942	1.22321			0.611374	1.35043	1.37975	0.993151	0.633333	1.39906	3.06818	2.36765	2.90698	1.52284	0.416988	1.38767	1.00316	0.818792	0.984536	1.10843	0.79798
5.25	0.367568		1.21429			0.744076	1.36752	1.79747	1.09589	0.528205	1.16432	3.63636	2.33824	2.46512		0.351351	1.40088	1.02532	0.825503	1.00515	1.00602	0.752525
6	0.616216		1.10714			0.526066	1.2735	1.51899	1.28767	0.553846	1.07042	4.88636	2.36765	2.83721		0.370656	0.85022	1.01266	0.791946	0.969072	1.00602	0.90404
6.75	0.264865		0.991071			0.535545	1	2.50633	1.07534	0.766667	0.981221	2.68182	1.95588	2.48837		0.389961	1.54626	1.00633	0.932886	0.974227	1.04819	0.916667
7.5	0.32973		0.696429			0.483412	0.820513	2.13924	0.910959	0.779487	1.30047	4.20455	1.41176	2.0814		0.420849	1.39207	0.962025	0.973154	0.958763	0.891566	0.929293
8.25	0.621622		1.09821			0.364929	2.35043	2.13924	0.773973		1.7277	3.36364	1.01471	2.13953		0.521236	1	0.984177	0.825503	0.948454	0.849398	0.760101
9	0.464865		0.901786			0.43128	1.03419	1.94937	0.636986		1.56338	3.93182	1.07353	2.22093			0.837004	0.857595	0.644295	0.938144	0.837349	0.820707
9.75	0.281081		0.794643			0.42654	1.46154	2.05063	0.589041		1.32394	2.77273	1.5				0.867841	0.857595	0.557047	0.92268	0.771084	0.871212
10.5	0.583784		0.901786			0.331754	0.897436	1.93671	0.650685		1.15962	2.40909					0.797357	0.955696	0.677852	0.943299	0.73494	0.835859
