# Supplementary material for: Microtubules restrict F-actin polymerization to the immune synapse via GEF-H1 to maintain polarity in lymphocytes
Source: eLife journal article supplement (doi:10.7554/elife.78330), 2022-09-16
Supplement: supp [file Figure1E_F.xlsx]

## Sheet: Antigen Recruitment BSA aIgG
Time (min)	BSA																								αIgG
0	1	1	1	1	1	1	1	1	1	1	1	1	1	1	1	1	1	1	1	1	1				1	1	1	1	1	1	1	1	1	1	1	1	1	1	1	1	1	1	1	1	1	1	1	1	1
0.5	1.0537	0.95996	1.09705	1.01923	0.980827	0.991549	0.992302	1.04145	1.11675	0.963475	0.960503	1.05631	0.982249	1.14648	1.15774	1.05613	0.965766	0.985727	1.16733	1.0455	1.04664				0.899142	0.763744	1.12339	1.13053	1.07573	0.880834	1.08811	1.07371	1.08822	1.12656	1.0444	1.08677	1.22201	1.3706	1.20992	1.06061	1.18499	1.15547	1.19307	1.01093	1.0918	1.10215	0.942997	1.33491	1.03074
1	1.18611	0.982983	1.06435	1.00192	0.968718	0.932394	1.08607	1.03731	1.09645	1.02962	1.04309	0.97911	1.04903	1.07227	1.10808	1.10967	0.999099	0.991971	1.08218	0.924171	0.886194				1.15558	0.892273	1.18145	1.47263	0.976699	0.939424	1.27813	1.11639	1.2029	1.3361	1.0518	1.17612	1.28995	1.353	1.11355	1.19257	1.44193	1.23285	1.23723	1.13121	1.22816	1.23656	0.959283	1.1907	1.06052
1.5	1.26852	0.87988	1.06435	0.95	0.911201	0.960563	1.10847	0.899482	1.15736	1.01876	0.95781	0.840145	1.13018	0.972656	1.02532	0.891192	0.985586	0.973238	1.09901	0.992417	0.873134				1.2103	0.93685	1.33226	1.42421	1.07184	1.0993	1.41083	1.15131	1.36295	1.26971	1.00648	1.21993	1.23445	1.34679	1.15363	1.23167	1.4296	1.35693	1.26234	1.15308	1.3877	1.41756	1.00733	0.97723	1.12008
2	1.09352	0.862863	1.03692	0.953846	0.877901	0.976526	0.971309	0.929534	0.900169	0.984205	0.944345	0.832879	1.00761	0.96582	0.956183	0.900691	0.910811	0.886708	1.09505	0.941232	0.858209				1.20601	0.973997	1.35645	1.45053	1.20097	1.14995	1.41826	1.1969	1.4436	1.24274	1.19149	1.11254	1.32919	1.45963	1.19656	1.37537	1.40699	1.4854	1.3974	1.14612	1.51872	1.59767	0.983713	1.07211	1.24111
2.5	1.01111	0.857858	1.05274	0.924038	0.917255	0.895775	0.913226	0.872539	0.831641	0.957552	0.894973	0.824705	0.828402	0.941406	1.00682	0.92487	0.902703	0.975022	0.990099	0.922275	0.909515				1.15558	1.09658	1.56935	1.59895	1.14369	1.16385	1.45541	1.25024	1.29238	1.29461	1.17484	1.29381	1.55885	1.52899	1.53435	1.3695	1.3926	1.48978	1.43983	1.15308	1.47415	1.64875	1.10342	1.10531	1.22863
3	1.13796	0.806807	0.983122	0.893269	0.979818	0.949296	0.79986	0.927461	0.841794	1.02863	0.89228	0.82198	0.869822	0.886719	1.02045	0.928325	1.01081	0.942908	1.14554	0.958294	0.873134				1.68562	1.20654	1.7379	1.71579	1.14757	1.21946	1.41295	1.48109	1.27599	1.31432	1.23034	1.2732	1.87081	1.59213	1.70038	1.52884	1.58376	1.5073	1.42424	1.21968	1.52763	1.69982	1.13762	1.12808	1.31316
3.5	1.01667	0.698699	0.945148	0.976923	0.9889	0.961502	0.839048	0.892228	0.87225	0.990128	0.931777	0.792916	0.867287	0.921875	0.96592	0.918826	1.00721	0.991079	1.00792	0.984834	0.895522				1.27575	1.34547	1.71855	1.70211	1.29126	1.26713	1.41507	1.49079	1.40391	1.29564	1.34413	1.35739	1.82967	1.60766	1.59065	1.46628	1.46454	1.50949	1.42944	1.23459	1.55615	1.6362	1.15065	1.11575	1.39577
4	0.983333	0.852853	0.96308	0.936538	0.948537	0.923944	0.917425	0.899482	0.899323	0.896347	0.837522	0.82743	0.906171	0.924805	0.919182	0.880829	1.02072	1.0339	1.05941	0.940284	0.911381				1.67811	1.24591	1.78145	1.70105	1.25631	1.14995	1.40021	1.58778	1.42155	1.37759	1.40888	1.39691	1.82775	1.78054	1.64027	1.47214	1.45838	1.51168	1.56537	1.32207	1.47861	1.77509	1.17345	1.18596	1.26513
4.5	1.00185	0.778779	0.973629	0.944231	0.893037	0.976526	0.935619	0.892228	0.956007	1.02468	0.90754	0.82198	0.853762	0.890625	0.991237	0.895509	0.989189	0.956289	1.01782	0.972512	0.921642				1.78541	1.2734	1.65806	1.87789	1.32136	1.06356	1.45754	1.52182	1.55955	1.38174	1.38483	1.36512	2.19809	1.99068	1.75477	1.58358	1.49435	1.61752	1.75152	1.24056	1.64439	1.79839	1.13111	1.16509	1.25264
5	1.12315	0.710711	0.9673	0.992308	0.916246	0.898592	0.89923	0.909845	0.950931	0.988154	0.921005	0.828338	0.86306	0.895508	1.01461	0.895509	1.0009	0.99554	0.959406	0.961137	0.835821				1.66631	1.22288	1.53871	1.87474	1.05825	1.19166	1.46178	1.62852	1.661	1.33714	1.37835	1.50258	2.489	1.48033	1.52576	1.52884	1.47276	1.73431	1.75584	1.33698	1.63815	1.8853	1.23453	1.21917	1.26705
5.5	1.08704	0.692693	0.983122	0.928846	0.93441	0.90892	0.928621	0.897409	0.972927	0.95459	0.899461	0.86376	0.928149	0.898438	1.08471	0.863558	0.97027	1.00268	1.01584	1.05308	0.949627				1.82189	1.22585	1.77984	1.78421	1.30583	1.33863	1.47877	1.75946	1.64524	1.29253	1.3839	1.48625	2.74545	1.64493	1.39218	1.56794	1.65673	1.62117	1.55931	1.21372	1.65865	1.83154	1.1816	1.21252	1.24111
6	1.08056	0.675676	0.936709	0.956731	0.9556	0.961502	0.912526	0.951295	0.981387	0.952616	0.943447	0.817439	0.845309	0.894531	0.949367	0.776339	0.998198	0.966994	0.948515	0.969668	0.982276				1.40558	1.16122	1.74839	1.82211	1.28544	1.14399	1.40234	1.6547	1.74417	1.51763	1.50786	1.53351	2.59234	1.75983	1.78149	1.60508	1.39466	1.63504	1.50649	1.37078	1.72995	2.01703	1.18078	1.21347	1.36215
6.5	1.09074	0.715716	0.944093	0.974038	0.915237	0.920188	0.944717	0.925389	0.951777	0.973346	0.915619	0.888283	0.786982	0.881836	1.00487	0.888601	0.99009	0.975914	0.968317	1.03128	0.879664				1.69528	1.18425	1.72177	2.03789	1.35243	1.19861	1.4724	1.84481	1.6276	1.43568	1.35893	1.56873	2.51866	2.10766	1.85401	1.55132	1.40699	1.40949	1.51342	1.35487	1.68004	2.00986	1.2272	1.22296	1.36792
7	1.06019	0.664665	0.945148	0.968269	0.9667	0.946479	0.951015	0.866321	0.914552	1.02764	0.905745	0.844687	0.822485	0.924805	0.957157	0.891192	0.981081	0.919715	0.99703	1.03033	0.925373				1.58584	1.25409	1.49758	1.88526	1.2932	1.20159	1.41507	1.96411	1.64587	1.63278	1.3506	1.55241	2.00478	2.353	1.76431	1.54643	1.44193	1.71606	1.5316	1.25249	1.75223	2.13351	1.24756	1.16698	1.40634
7.5	1.06296	0.656657	0.973629	0.872115	0.924319	0.942723	0.911826	0.891192	0.928088	1.01382	0.872531	0.911898	0.826712	0.947266	0.988315	0.841969	0.975676	0.982159	0.964356	1.01991	0.883396				1.59657	1.35958	1.73387	2.02737	1.33204	1.22344	1.46709	1.69156	1.67612	1.53734	1.40611	1.59536	2.38182	2.30124	1.78244	1.63734	1.50051	1.65328	1.6	1.35785	1.72103	2.32706	1.21743	1.16888	1.45629
8	1.02222	0.971972	0.989451	0.973077	0.953582	0.950235	0.89923	0.92228	0.92555	0.963475	0.868941	0.896458	0.844463	0.913086	0.929893	0.909326	0.993694	1.00981	0.982178	1.00948	0.847948				1.89807	1.26226	1.77177	2.14105	1.38738	1.36544	1.46285	1.66925	1.73031	1.48859	1.43663	1.60739	1.47081	2.22981	2.02004	1.65591	1.51593	1.66277	1.41472	1.27038	1.7148	2.29032	1.24349	1.20114	1.41787
8.5	1.01389	0.674675	0.979958	0.911538	0.93441	0.937089	0.940518	0.92228	0.895939	0.982231	0.959605	0.81653	0.76754	0.920898	0.96592	0.85924	0.969369	0.992864	0.99703	0.982938	0.932836				1.22639	1.30461	1.85887	1.91263	1.4165	1.2721	1.58705	1.70417	1.71141	1.61515	1.46438	1.5232	1.9311	1.67805	2.24046	1.51515	1.54882	1.77226	1.6026	1.25348	1.7139	2.30556	1.2842	1.20778	1.45917
9	1.09259	0.738739	0.93038	0.995192	0.916246	0.957746	0.926522	0.936788	0.950085	0.960513	0.939856	0.82743	0.792054	0.941406	0.9815	0.869603	1.0036	0.936664	0.99604	0.950711	0.836754				1.78433	1.474	1.72903	2.1	1.35243	1.13505	1.61253	1.6033	1.82483	1.75	1.48936	1.53179	2.64785	1.47308	2.10973	1.74096	1.4594	1.91825	1.65455	1.37276	1.84225	2.26075	1.25814	1.16509	1.38713
9.5	1.05093	0.747748	0.949367	1.02115	0.920283	0.959624	0.925822	0.91399	0.900169	0.941757	0.937163	0.866485	0.893491	0.914062	0.954236	0.868739	0.994595	0.93934	0.966337	1.01517	0.909515				1.86159	1.42422	1.78468	2.05789	1.37087	1.26216	1.50637	1.61009	2.14178	1.97822	1.47826	1.67354	2.55789	1.62319	1.95324	1.71848	1.38952	1.96131	1.68485	1.33797	1.81818	2.0233	1.26792	1.18121	1.44573
10	0.977778	0.763764	0.947257	0.984615	0.963673	0.962441	0.949615	0.887047	0.950085	0.958539	0.897666	0.837421	0.802198	0.946289	0.97371	0.866149	0.965766	0.900981	1.00693	0.981043	0.865672				1.67918	1.38856	1.91371	2.11579	1.41845	1.25223	1.44586	1.64888	2.29805	1.85788	1.42091	1.72938	2.85837	2.04244	2.2271	1.66373	1.3186	1.78102	1.73939	1.30517	1.77094	2.43996	1.22476	1.18786	1.49376
10.5	0.94537	0.910911	0.914557	0.944231	0.944501	0.967136	0.912526	1.00207	0.960237	1.03554	0.863555	0.864668	0.863905	0.887695	0.999026	0.884283	0.962162	0.957181	0.953465	0.934597	0.915112				1.79936	1.43239	1.74516	2.02421	1.45146	1.37239	1.56476	1.86033	2.09767	1.77801	1.57817	1.73454	2.53301	2.26708	2.14218	1.94819	1.54368	1.61971	1.5697	1.32306	1.99733	2.08781	1.2956	1.16509	1.49087
11	1.03796	0.747748	0.949367	0.976923	0.94551	0.95493	0.913926	0.989637	0.970389	1.00197	0.872531	0.850136	0.819104	0.935547	1.01071	0.87133	0.973874	0.912578	0.962376	0.965877	0.895522				1.44313	1.55126	1.85	1.93474	1.47087	1.38729	1.50955	1.78274	2.35539	1.65768	1.63552	1.77577	2.82392	1.81988	2.15172	1.73021	1.51593	1.84964	1.74372	1.35487	1.98039	2.07885	1.40879	1.2685	1.45821
11.5	1.03056	0.804805	0.934599	1.01058	0.953582	0.953052	0.925122	0.931606	0.864636	1.01185	0.896768	0.875568	0.806424	0.924805	1.00876	0.867012	0.963964	0.938448	1.00792	1.00664	0.962687				1.82403	1.70951	1.85484	2.00737	1.37087	1.5283	1.66879	1.7934	2.25772	1.65249	1.61887	1.61942	2.83541	1.853	2.3979	1.75073	1.54573	1.94088	1.65628	1.30915	2.01604	2.09677	1.20847	1.16888	1.46494
12	1.03426	0.775776	0.958861	0.978846	0.971746	1.00094	0.96501	0.934715	0.891709	0.976308	0.911131	0.845595	0.802198	0.918945	0.986368	0.850604	0.945946	0.938448	0.966337	1.01232	0.988806				1.67275	1.75854	2.01532	1.66842	1.41553	1.3287	1.65074	1.65664	2.18778	1.97822	1.68178	1.73368	2.4756	1.86232	2.27099	1.59629	1.37821	2.09781	1.88485	1.34095	1.8984	2.07258	1.28257	1.33681	1.50528
12.5	1.09074	0.684685	0.962025	0.948077	0.910192	0.958685	0.950315	0.912953	0.788494	0.973346	0.93088	0.856494	0.813187	0.878906	1.01168	0.902418	0.961261	0.91347	0.925743	1.01232	0.959888				1.80579	1.75409	1.73226	1.84105	1.4767	1.23734	1.68365	1.88846	2.37996	1.97614	1.53099	1.8256	2.43158	2.46377	2.45706	1.56989	1.62487	2.14672	1.6987	1.42346	1.9902	2.13799	1.18974	1.1945	1.46398
13	1.03611	0.663664	1.00105	0.951923	0.956609	0.933333	0.90133	0.915026	0.909475	1.07305	0.947038	0.793824	0.814032	0.916016	0.974684	0.863558	1.02252	0.916146	0.965347	0.969668	0.953358				1.56974	1.72363	1.97581	1.98737	1.55922	1.27805	1.7845	1.85839	2.48834	1.66079	1.78631	1.65292	2.16268	2.1853	2.47328	1.67253	1.50565	2.18905	1.61818	1.45626	2.11676	2.05824	1.1873	1.28748	1.5389
13.5	0.95463	0.697698	0.932489	0.960577	0.962664	1.10798	0.961512	0.91399	0.885787	0.918065	0.88061	0.821072	0.764159	0.972656	0.980526	0.906736	0.936937	0.958073	0.992079	0.956398	0.976679				1.78755	1.60847	2.16935	2.09684	1.58544	1.4856	1.68471	1.77789	2.34152	1.99896	1.70953	1.74141	2.2488	1.66874	2.27576	1.75171	1.70195	2.25401	1.75238	1.43241	2.18449	2.13799	1.31759	1.25996	1.50528
14	0.960185	0.63964	0.949367	0.959615	0.9667	1.1831	0.972008	0.88601	0.838409	0.860809	0.953321	0.826521	0.799662	0.898438	0.970789	0.879102	0.987387	0.919715	0.978218	0.952607	0.960821				1.897	1.78678	2.06129	1.88632	1.5699	1.22939	1.67622	1.64597	2.20416	1.92012	1.7234	1.79038	2.00287	1.8147	2.1479	1.6217	1.51696	2.25474	1.6329	1.42247	1.95455	2.07079	1.23941	1.32068	1.47839
14.5	0.959259	0.71972	1.0116	0.951923	0.94551	1.15681	0.892932	0.900518	0.869712	0.959526	0.940754	0.826521	0.808115	0.865234	0.996105	0.935233	1.0018	0.891169	0.977228	1.01517	0.949627				1.85086	1.86404	2.19435	2.05895	1.62233	1.44091	1.80467	1.87391	2.32388	1.88278	1.6087	1.8445	2.37416	1.82402	2.09924	1.62952	1.43679	2.28394	1.71082	1.38072	2.07219	2.13441	1.22964	1.33966	1.49472
15	0.92037	0.744745	0.998945	0.9875	0.948537	1.06761	0.918824	0.928497	0.906937	0.923988	0.866248	0.832879	0.797971	0.895508	0.978578	0.889465	0.997297	0.99554	0.972277	0.877725	1.04198				1.42811	1.85067	2.28065	2.16316	1.5699	1.31678	1.90021	1.80504	2.39382	1.75934	1.62535	1.8256	2.02392	2.00828	2.00573	1.86901	1.53751	2.04818	1.72987	1.39761	2.16043	2.16039	1.24267	1.35484	1.43516
15.5	0.906481	0.638639	0.983122	1.04712	0.943491	1.03568	0.887334	0.91399	0.857022	0.860809	0.860862	0.857402	0.843618	0.921875	1.00584	0.889465	0.987387	0.940232	0.982178	0.88436	1.00093				1.95064	1.67756	2.1379	2.07474	1.55146	1.2721	1.72399	1.7614	2.71204	1.71369	1.61055	2.061	1.86699	2.0766	2.4895	1.64125	1.5406	2.46569	1.78615	1.39662	2.06684	2.0914	1.28746	1.30171	1.36984
16	1.00741	0.78979	1.00527	0.971154	0.899092	1.02066	0.888034	0.92228	0.86379	0.931885	0.850987	0.84287	0.772612	0.977539	1.02824	0.900691	0.996396	0.93488	0.961386	0.890047	0.944963				2.12554	1.64487	2.01694	2.14632	1.58544	1.3863	1.68577	1.74588	2.66541	1.75415	1.97502	1.96993	1.84689	2.16149	2.51431	1.46139	1.44707	2.62774	1.84935	1.34095	2.21569	2.07796	1.28013	1.29222	1.48895
16.5	0.949074	0.755756	1.01688	1.02212	0.964682	1.09202	0.941218	0.891192	0.897631	0.991115	0.793537	0.873751	0.786137	0.910156	0.998053	0.900691	0.976577	0.927743	0.951485	0.933649	0.956157				1.78863	1.70877	1.93065	2.24947	1.64272	1.43198	1.70701	1.74103	2.61752	1.67635	1.85014	2.00258	2.37033	2.0383	2.19847	1.49462	1.6074	2.68613	1.92814	1.17793	1.97415	2.14427	1.37052	1.3112	1.47839
17	1.01852	0.642643	0.968354	0.946154	0.943491	1.1061	0.895731	0.905699	0.839255	0.924975	0.834829	0.837421	0.785292	0.865234	0.984421	0.867012	0.994595	0.921499	0.932673	0.891943	0.920709				1.89163	1.94354	2.00806	1.82842	1.54854	1.23436	1.71975	1.7711	2.58475	1.66701	1.82794	1.80928	2.50144	2.08178	3.03721	1.42229	1.53443	2.22993	1.69264	1.26342	2.09537	2.05287	1.34528	1.3814	1.50144
17.5	0.982407	0.678679	0.958861	0.977885	0.87891	1.09108	0.888034	0.902591	0.833333	0.935834	0.847397	0.839237	0.71344	0.871094	0.997079	0.908463	0.961261	0.926851	0.960396	0.867299	0.892724				2.09013	1.82987	2.16129	2.18947	1.51845	1.32771	1.62739	1.86324	2.44928	1.71369	1.70398	2.08162	2.40191	2.22464	2.47042	1.50538	1.65673	2.52847	1.84675	1.26243	1.93583	2.11828	1.34772	1.3871	1.49087
18	0.971296	0.658659	1.02637	0.9375	0.924319	1.09014	0.877537	0.866321	0.868866	0.879566	0.835727	0.851953	0.814032	0.864258	1.04284	0.88342	0.924324	0.947368	0.935644	0.870142	0.933769				1.90451	1.72808	2.04355	2.52947	1.49029	1.31877	1.83758	1.55383	2.48897	1.78942	1.75301	2.13402	3.08134	2.28468	2.14504	1.53861	1.66701	2.32993	1.9013	1.35984	2.17112	2.14785	1.35749	1.39943	1.47646
18.5	0.92037	0.646647	0.925105	0.9875	0.984864	1.07042	0.896431	0.893264	0.840102	0.92695	0.908438	0.837421	0.830093	0.910156	1.00292	0.904145	0.98018	0.970562	0.941584	0.832227	0.959888				1.9206	1.80535	1.87984	2.31474	1.40485	1.39623	1.51699	1.99903	2.54568	1.47407	1.75763	2.16495	2.24306	2.29193	1.95706	1.40958	1.4111	2.42774	1.90476	1.30517	2.21658	2.22222	1.34365	1.30455	1.43612
19	1.02778	0.684685	0.916667	1.00673	0.931382	1.11268	0.920224	0.907772	0.799492	0.891412	0.929982	0.826521	0.76754	0.878906	0.985394	0.874784	0.947748	0.984835	0.958416	0.963981	0.941231				1.85837	1.54978	1.99758	2.40105	1.43107	1.0864	1.63482	1.72551	2.55451	1.67324	1.82886	2.16151	2.66699	2.40787	2.68511	1.4262	1.37924	2.41971	1.87359	1.27336	2.23173	2.10932	1.41775	1.37951	1.439
19.5	0.999074	0.754755	0.975738	0.942308	0.968718	1.08732	0.927922	0.859067	0.791878	0.929911	0.825853	0.82198	0.820795	0.918945	1.03797	0.944732	0.967568	0.924175	1.01287	0.901422	0.936567				1.90987	1.73626	2.01694	2.12947	1.49806	1.2433	1.63588	1.75655	2.84121	1.73133	1.75671	2.0378	2.61722	2.40062	2.80153	1.38123	1.46351	2.20876	1.9316	1.41054	2.12656	2.14964	1.36808	1.35958	1.48031
20	1.00093	0.730731	0.992616	1.02212	0.907164	1.01784	0.892932	0.888083	0.742809	0.856861	0.843806	0.843778	0.881657	0.933594	0.987342	0.929188	0.954955	1	1.08416	0.919431	0.882463				1.73712	1.69316	2.025	2.17368	1.43495	1.4429	1.91401	1.90592	2.79269	1.87137	1.7234	2.02234	2.689	2.3882	2.81775	1.30694	1.56115	2.62993	1.88052	1.37177	2.18538	2.14337	1.40879	1.43454	1.48031
20.5	0.957407	0.705706	0.986287	1.01923	0.933401	1.04507	0.870539	0.916062	0.848562	0.938796	0.833932	0.799273	0.839391	0.912109	0.9815	0.861831	0.963063	1.01784	1.03267	0.927962	0.927239				1.64056	1.75557	2.03468	2.73053	1.5932	1.63257	1.80361	2.21048	2.31758	1.71888	1.77243	2.13144	1.97129	2.28986	2.65649	1.48094	1.47174	2.26277	2.06147	1.3002	2.33601	2.10125	1.45603	1.426	1.44284
21	0.991667	0.747748	1.03376	0.897115	0.9667	1.05352	0.905528	0.889119	0.822335	0.946693	0.85009	0.782016	0.803043	0.972656	1.00097	0.873921	0.982883	1.00357	0.949505	0.962085	0.92444				2.00107	2.03418	2.01048	2.38421	1.42621	1.53724	1.86518	2.26673	2.4644	1.63797	1.75301	2.12113	2.43828	2.37474	2.57634	1.32942	1.56321	2.2562	2.00952	1.22068	2.43939	2.15233	1.41694	1.39469	1.35639
21.5	0.959259	0.748749	0.968354	0.947115	0.944501	1.07981	0.860742	0.900518	0.821489	0.892399	0.834829	0.824705	0.817413	1.01562	0.93963	0.882556	0.959459	0.99554	0.953465	0.922275	0.985075				1.84227	1.83507	2.30081	2.34632	1.21748	1.4717	1.83758	2.50048	2.25709	1.89004	1.88437	2.10137	2.3866	2.19876	2.23092	1.62561	1.35971	2.34307	2.08139	1.14215	2.49287	2.15143	1.5399	1.39943	1.39001
22	1.01019	0.784785	0.9673	0.868269	0.929364	1.1108	0.857943	0.905699	0.866328	0.880553	0.825853	0.743869	0.866441	0.995117	0.988315	0.85924	0.930631	0.955397	0.918812	0.911848	0.923507				1.86803	2.04383	2.15242	2.27158	1.43592	1.72393	1.85775	2.08244	2.17895	1.83402	2	2.01718	2.36938	2.50725	2.12691	1.46139	1.54573	2.70219	1.9368	1.25447	2.23886	2.25358	1.43241	1.35484	1.48031
22.5	1.00278	0.690691	1.01793	0.900962	0.922301	1.14085	0.969909	0.894301	0.950931	0.897335	0.862657	0.921889	0.841927	0.913086	0.956183	0.842832	0.965766	0.950937	0.954455	0.900474	0.978545				1.53541	1.85215	2.3629	2.51684	1.41845	1.5859	1.78556	1.87391	2.46062	1.78838	1.96577	2.03436	2.73301	2.33851	2.16794	1.42424	1.44193	2.42555	1.96277	1.167	2.12834	2.20161	1.3241	1.32353	1.48511
23	1.06574	0.754755	0.934599	0.927885	0.968718	1.15117	0.869139	0.893264	0.902707	0.900296	0.824057	0.777475	0.824176	1.01172	0.943525	0.851468	0.957658	0.970562	0.932673	0.927962	0.916978				1.84657	1.60847	2.31129	2.62526	1.55146	1.39921	1.86412	2.13482	2.29049	1.80809	2.05828	2.36082	2.71675	2.69048	3.01527	1.82405	1.42446	2.34015	1.71082	1.22962	2.3262	2.04659	1.41857	1.33017	1.39769
23.5	1.01481	0.727728	0.958861	0.970192	0.896065	1.06103	0.945416	0.893264	0.843486	0.911155	0.790844	0.768392	0.863905	1.00879	0.985394	0.878238	0.983784	0.980375	0.982178	0.917536	0.915112				1.88734	2.05126	2.13306	2.76211	1.40777	1.46971	1.78662	1.92532	2.39509	1.80394	1.85199	2.13488	2.28708	2.5528	2.75191	1.69697	1.5704	2.69489	1.8026	1.19881	2.17736	2.2052	1.39821	1.36433	1.36792
24	0.960185	0.747748	0.981013	0.905769	0.946519	1.0169	0.952414	0.93886	0.846024	0.932873	0.791741	0.811989	0.83601	1.02637	0.996105	0.897237	1.0027	0.973238	0.993069	0.985782	0.912313				1.62017	2.16642	2.26532	2.51368	1.5165	1.63952	1.88854	1.98448	2.97606	1.9305	1.79093	2.1555	2.42775	2.35714	2.74905	1.48094	1.62693	2.26642	2.04329	1.34195	2.14439	2.36918	1.40717	1.35389	1.34582
24.5	0.974074	0.756757	0.970464	0.946154	0.89001	1.04131	0.926522	0.928497	0.78934	0.893386	0.795332	0.829246	0.860524	1.0498	0.990263	0.889465	0.945045	0.958965	0.979208	1.02654	0.911381				1.44313	2.25706	2.17661	2.52842	1.57864	1.62165	1.81635	1.91077	2.53056	1.87552	1.90657	2.1701	2.22679	2.44203	2.56298	1.39589	1.52826	2.76642	1.88918	1.22962	2.35651	2.2724	1.45195	1.42125	1.47166
25	0.984259	0.737738	0.974684	0.998077	0.965691	1.08451	0.927922	0.91399	0.848562	0.996051	0.818671	0.811081	0.820795	1.0127	0.982473	0.889465	0.944144	0.885816	0.990099	0.985782	0.941231				1.63841	2.20357	2.32581	2.79368	1.63883	1.63158	1.68471	1.75849	2.54694	1.90975	1.74283	1.89605	2.51675	2.5766	2.48855	1.34213	1.53854	2.49854	1.84329	1.22863	2.2344	2.15054	1.37948	1.39089	1.3708
25.5	1.05278	0.760761	0.972574	0.948077	0.943491	0.97277	0.919524	0.910881	0.856176	1.02567	0.847397	0.801998	0.819104	1.01367	0.963973	0.875648	0.958559	0.960749	0.993069	0.964929	0.849813				1.70064	1.91085	2.09677	2.33053	1.49515	1.67925	1.79087	1.88264	2.30246	2.07988	1.86401	2.09192	2.85263	2.56522	2.71183	1.34213	1.54985	2.13504	2.07965	1.28827	2.36809	2.11111	1.45603	1.46774	1.39577
26	1.01111	0.6997	0.99789	1.01058	0.907164	0.985915	0.850245	0.952332	0.780034	1.07404	0.917415	0.836512	0.83432	0.975586	1.00876	0.846287	0.977477	0.958965	1.00594	0.994313	0.862873				1.9206	1.52526	2.15161	2.52632	1.57184	1.63754	1.94055	2.50242	2.67738	2.07573	1.81129	2.16409	2.91196	2.51863	2.40649	1.38905	1.4851	2.43358	2.03983	1.36183	2.42157	2.2043	1.4202	1.40038	1.39001
26.5	0.983333	0.813814	0.913502	0.980769	0.906155	0.973709	0.875437	0.891192	0.796108	1.07897	0.883303	0.852861	0.809806	1.0166	1.01655	0.887737	0.997297	0.962533	1.01188	0.995261	0.883396				1.89592	1.66048	2.02823	2.34526	1.65049	1.571	1.71019	2.7808	2.86957	2.0695	1.74191	2.06186	3.06794	2.59627	2.66985	1.33236	1.62179	2.48394	1.87965	1.38569	2.32086	2.21147	1.47313	1.55882	1.38232
27	1.04352	0.71972	0.957806	0.979808	0.957619	1.01221	0.913226	0.911917	0.80203	1.04047	0.908438	0.820163	0.79459	0.97168	0.9815	0.897237	1.03243	0.930419	1.01188	0.98673	0.926306				2.19421	1.53195	1.89194	2.53053	1.5068	1.50645	1.93949	2.02813	2.59672	1.96992	1.642	2.1701	3.20287	2.53313	2.92366	1.21701	1.53854	2.52701	1.82165	1.56958	2.11497	2.10842	1.53827	1.51328	1.4755
27.5	1.04444	0.705706	0.995781	0.956731	0.917255	0.962441	0.874038	0.906736	0.847716	1.05824	0.870736	0.840145	0.789518	1.00781	1.03213	0.914508	0.963063	0.975914	0.980198	1.01517	0.976679				2.17811	1.65527	1.84355	2.72	1.56893	1.73784	1.86624	2.30941	2.74228	1.94087	1.85106	2.11512	3.08134	2.54762	2.95802	1.32942	1.51182	2.58394	2.09957	1.46918	2.32442	2.15143	1.44381	1.36528	1.42171
28	0.958333	0.754755	0.933544	1	0.911201	0.964319	0.904129	0.878756	0.861252	0.931885	0.900359	0.809264	0.790363	0.990234	1.00389	0.930052	1.02072	0.919715	0.959406	0.977251	0.983209				2.14914	1.63447	1.98306	2.59789	1.36893	1.43992	1.69639	2.2483	2.523	1.87759	1.79001	1.82131	2.47847	2.51553	2.28531	1.35484	1.55498	2.52993	2.05108	1.25845	2.41266	2.18011	1.43974	1.58159	1.40154
28.5	1.02963	0.697698	0.958861	1.01827	0.905146	0.966197	0.883135	0.959585	0.761421	1.01579	0.898564	0.779292	0.786982	0.990234	0.962025	0.856649	0.99009	0.959857	1.03564	1.01137	1.14179				2.17275	1.66716	2.11855	2.66421	1.36505	1.39921	1.71975	2.31523	2.58538	2.04772	1.99167	2.14605	2.67177	2.66046	3.18607	1.56989	1.45735	2.47299	2.02078	1.36083	2.44742	2.14337	1.46417	1.47249	1.42939
29	0.975	0.65966	0.957806	0.975962	0.906155	0.966197	0.787264	0.867358	0.774958	0.931885	0.944345	0.841054	0.788673	1.02148	0.950341	0.917962	1.0018	0.958073	0.986139	0.967773	0.831157				1.61373	1.73254	2.23871	2.46	1.35825	1.46773	1.68471	2.36275	2.48582	1.8973	1.95282	2.05326	2.99809	2.71222	3.48282	1.31965	1.41007	2.76204	1.94545	1.48708	2.62567	2.23835	1.51221	1.51423	1.40826
29.5	1.025	0.771772	0.945148	0.983654	0.907164	1.08451	0.83345	0.879793	0.875635	0.981244	0.915619	0.762035	0.845309	1.02637	0.968841	0.881693	1.00991	0.966994	1.03267	0.964929	0.93097				2.06867	1.84621	2.17984	2.64	1.39612	1.7994	1.70807	2.31232	2.62823	2.02282	1.95467	2.00773	2.76555	2.54555	2.74141	1.37146	1.62384	2.71533	2.03117	1.25348	2.39394	2.17204	1.48453	1.53036	1.38425
30	0.997222	0.727728	0.937764	1.05865	0.932392	1.15117	0.912526	0.94715	0.835871	0.876604	0.913824	0.791099	0.856298	0.986328	1.00097	0.900691	0.967568	1.00892	0.973267	0.938389	0.907649				1.76717	2.31872	2.06855	2.31368	1.3932	1.84707	1.80042	2.28031	2.86137	2.15145	1.90287	2.04639	2.83923	2.62422	2.97615	1.46628	1.39363	2.64453	1.78442	1.42545	2.11854	2.23118	1.69055	1.58444	1.44188
Mean 25-30 min	1.00951	0.731732	0.958669	0.991871	0.923585	1.01127	0.880081	0.910881	0.821797	1.00099	0.892606	0.813228	0.812342	1.00115	0.988315	0.890721	0.987551	0.953451	0.9982	0.981991	0.930461				1.93631	1.78968	2.08424	2.53837	1.48305	1.61063	1.77649	2.2528	2.61992	2.00387	1.84047	2.05217	2.85333	2.5814	2.80274	1.36675	1.51686	2.52608	1.96332	1.37168	2.34387	2.17294	1.48201	1.48905	1.40922
[truncated: 2 more columns]
