# Supplementary material for: Microtubules restrict F-actin polymerization to the immune synapse via GEF-H1 to maintain polarity in lymphocytes
Source: eLife journal article supplement (doi:10.7554/elife.78330), 2022-09-16
Supplement: supp [file Figure2A.xlsx]

## Sheet: Temporal data
DAG reporter enrichment in 1um/t0
Time (min)	BSA								aIgG
0	1	1	1	1	1	1	1		1	1	1	1	1	1	1	1	1	1	1	1	1	1	1	1	1	1	1	1
0.5	1.05682	0.632474	0.89529	0.93299	1.34193	0.930788	0.976061		3.10647	0.986841	2.96486	0.939546	3.16996	1.23171	1.14068	1.28057	1.35793	1.64955	1.59134	1.15338	3.24948	2.37033	2.18921	1.6998	1.4035	1.07142	1.17492	1.1536
1	1.08069	0.508763	0.899952	1.26031	1.4832	0.519956	0.979325		6.124	0.972175	3.52125	0.748008	3.81896	1.2881	1.28516	0.900247	1.76515	1.35901	1.07156	1.52516	5.13489	4.00211	2.32691	2.01779	1.61425	1.56928	1.19928	0.940137
1.5	0.89062	0.535567	0.858313	0.951031	2.10162	0.666841	0.642002		5.31758	1.35232	4.01791	0.681473	4.25779	1.47003	1.42829	0.822381	1.36198	1.24829	0.806968	1.33066	5.48461	4.64506	2.23675	1.73099	0.898842	1.3754	1.32694	0.816151
2	0.753598	0.37268	0.98105	1.0567	2.20533	0.50913	0.676823		4.99525	1.17533	4.11497	0.891157	4.43787	1.18588	1.58094	0.93138	1.43521	1.22623	0.789077	1.07665	5.48005	4.25501	2.90092	1.62858	0.801335	1.60956	1.05433	0.838244
2.5	1.51104	0.381959	0.960498	1.01031	2.56479	0.271745	0.602829		5.60727	1.59206	4.57173	0.627036	4.01886	1.26946	1.94191	0.967972	1.28261	1.86973	0.734463	1.05263	5.22577	4.34345	2.18198	1.76593	0.792471	1.41213	0.952542	0.914787
3	0.78934	0.434536	0.750424	0.574742	2.63957	0.478044	0.724701		5.10272	0.928257	5.02602	0.673408	3.71638	1.19685	1.94773	1.08489	1.23672	1.76613	0.814501	0.849529	3.63952	4.25482	0.930466	1.76408	0.950256	1.47991	0.92692	0.901901
3.5	1.00145	0.407732	0.481386	0.384021	2.88186	0.56465	0.690968		5.24728	1.48671	5.20942	0.574615	3.64972	1.29944	1.74557	1.01845	1.30528	1.76257	0.839925	0.912093	3.03169	4.59114	0.854296	1.14519	0.888205	1.23187	0.433012	0.942409
4	0.810775	0.38299	0.410191	0.345361	3.156	0.526674	0.65506		6.16893	1.39218	5.0387	0.500016	3.79775	1.28734	1.81296	1.00241	1.33893	1.04581	0.770245	1.03256	3.18574	4.67774	0.949882	1.12826	0.976848	1.18698	0.502925	0.921455
4.5	0.479063	0.362371	0.39087	0.260309	1.32215	0.731229	0.819369		5.28686	1.1979	5.04018	0.518162	3.46245	1.20596	1.64194	1.09635	1.67506	1.10834	0.76742	0.826868	2.94316	4.24447	1.14404	1.21033	1.4795	1.27878	0.471351	0.957415
5	0.684784	0.398454	0.349634	0.180412	1.03079	0.514928	0.535365		5.33468	0.930656	4.96076	0.568566	3.50182	1.59252	1.59418	1.07802	1.79228	1.1135	0.73258	0.808427	2.28968	4.65124	1.42146	1.3797	1.42974	1.20629	0.475862	1.08444
5.5	0.708497	0.362887	0.308535	0.041227	0.838795	0.623025	0.554951		6.07238	1.02673	4.53348	0.558485	3.27329	1.25584	1.71852	1.14675	1.50511	1.00512	0.750471	0.810664	2.3378	4.58368	0.88566	1.20903	1.47581	1.28959	0.526606	0.960695
6	0.610613	0.347423	0.270463	0	0.860298	0.629796	0.79543		3.88642	1.31189	5.74116	0.596793	3.42223	1.48768	1.77593	1.16165	1.7539	1.39809	0.806968	0.7767	2.64264	4.26256	1.95254	1.28069	1.37168	1.21528	0.568328	0.863751
6.5	0.978612	0.321649	0.103741	0.241995	0.837076	0.710968	0.585419		4.66076	1.16283	4.80626	0.534291	3.57042	1.39488	1.66329	1.21661	1.64702	1.36119	0.785311	0.824533	2.552	3.80696	1.62211	1.27287	1.72066	1.17092	0.735077	0.970206
7	0.9144	0.308763	0.128237	0.064433	0.733074	0.490827	0.623504		3.52482	1.13977	4.86578	0.850833	3.27038	1.39921	1.63473	1.19025	1.58809	1.03518	0.744821	0.788521	2.05671	4.04319	1.27596	1.41358	1.40849	1.00765	0.868721	0.935401
7.5	0.693106	0.335052	0.0331277	0	0.790908	0.593222	0.688792		3.78627	1.09029	4.68463	0.758088	3.28752	1.30626	1.5113	1.1811	1.62743	1.48078	0.720339	0.772753	1.77458	3.97807	1.02858	1.3328	1.53367	1.12076	1.29417	0.849626
8	0.62692	0.243299	0.0432257	0.0798969	0.780179	0.478129	0.816104		4.06406	0.956656	4.5181	0.73591	3.30289	1.44565	1.56299	1.17883	1.64689	1.51857	0.757062	0.550196	1.84461	3.87007	1.73175	1.67414	1.60955	0.998798	1.17301	1.00873
8.5	0.558093	0.225258	0.220759	0.123711	0.779933	0.398573	0.821545		3.86167	1.48551	4.39104	0.653246	3.14888	1.4128	1.64048	1.14675	1.73045	1.06303	0.830508	0.503457	1.9462	3.8839	1.07195	1.68717	1.51384	1.02864	1.00249	0.869625
9	0.639933	0.298969	0.0776523	0	0.610409	0.396466	0.584331		4.04949	0.965213	4.54703	0.7097	3.41505	1.46745	1.61274	1.17425	1.72208	1.43136	0.762712	0.614332	1.64076	3.80928	1.14821	1.92036	1.48489	0.969069	0.974635	1.10617
9.5	0.74027	0.295876	0.0500503	0.0335052	0.542753	0.221243	0.571273		4.42751	1.38202	4.39249	0.570488	3.3173	1.53504	1.60366	1.12035	1.87231	1.04045	0.824859	0.514421	1.9696	3.59065	2.06674	2.01268	1.47285	1.05783	1.16247	1.07155
10	0.434151	0.261856	0.0411778	0.164948	0.737909	0.410629	0.548422		4.76096	0.972526	4.92585	0.691475	3.44632	1.31518	1.48584	1.10202	1.74172	1.75272	0.752354	0.487571	2.07354	4.08023	1.15386	1.87722	1.55067	1.02193	1.08974	1.28887
10.5	0.459791	0.319588	0.105626	0.298969	0.5521	0.514629	0.534276		6.07423	1.13142	4.58085	0.57044	3.22295	1.47581	1.73427	1.15358	1.71907	1.44611	0.758945	0.516143	1.91737	4.11435	1.82875	1.97347	1.60967	0.752328	1.11535	1.29017
11	0.390108	0.283505	0.16468	0.39433	0.634	0.515709	0.796518		4.29756	0.91985	4.43119	0.447595	3.1151	1.40594	1.77291	1.11344	1.61345	1.45041	0.793785	0.553094	2.10505	4.03758	2.33709	2.10119	1.54765	0.744505	0.943614	1.19521
11.5	0.53031	0.306701	0.3319	0.407216	0.617654	0.464629	0.767138		3.79984	1.97535	4.52121	0.449611	3.04999	1.49194	1.57544	1.1353	1.81082	1.16206	0.77307	0.578588	1.82007	3.61475	1.43361	2.17043	1.42673	0.874746	0.987906	1.002
12	0.669825	0.264948	0.390357	0.425258	0.631283	0.470342	0.576714		3.27304	1.44948	4.50251	0.493785	3.2557	1.30386	1.53738	1.18685	1.65843	1.20838	0.742938	0.492147	2.37191	3.79005	1.27378	2.04203	1.57608	0.876703	1.03206	0.978069
12.5	0.4175	0.27268	0.394012	0.5	0.747947	0.554508	0.714908		3.69378	0.929714	4.47733	0.489935	3.20108	1.31546	1.58248	1.15477	1.71243	1.1322	0.789077	0.547037	2.0385	3.90779	1.36457	1.96	1.51143	0.900831	0.967927	1.02668
13	0.263753	0.304124	0.279849	0.559278	0.624346	0.706689	0.734494		3.76427	1.54153	4.7293	0.606819	3.22529	1.242	1.6938	1.09978	1.94937	1.00248	0.747646	0.541208	1.97513	3.87144	1.50848	1.85054	1.41755	0.955631	1.04405	0.951114
13.5	0.256954	0.276804	0.302994	0.561856	0.538793	0.715151	0.552775		4.37759	0.913233	4.84548	0.568566	3.1687	1.19952	1.72659	1.14556	1.93793	1.74356	0.735405	0.4984	2.12147	3.17554	1.73346	2.007	1.55345	0.883583	1.43073	1.01009
14	0.21874	0.32732	0.316999	0.610825	0.660507	0.660166	0.804135		3.73298	0.926619	4.98879	0.477798	3.18795	1.26236	1.51269	1.17977	1.65492	1.63541	0.756121	0.593409	2.07078	3.78411	2.4153	1.98256	1.46842	0.952768	1.16789	0.998173
14.5	0.168363	0.303608	0.357496	0.659794	0.532025	0.828853	0.631121		4.57145	0.92101	4.27895	0.47371	3.22598	1.33117	1.51385	1.13167	1.52892	1.53523	0.788136	0.587576	2.12665	3.82704	2.3502	1.99342	1.47048	0.97405	1.11236	0.933513
15	0.276745	0.301031	0.306906	0.791237	0.535248	0.690065	0.834603		4.38385	1.40635	5.41412	0.498	3.37366	1.31821	1.62218	1.13294	1.54943	1.12855	0.765537	0.490767	2.01446	3.79095	1.89438	1.95571	1.44728	0.948558	1.03676	0.92565
15.5	0.528295	0.246392	0.352175	0.685567	0.458674	0.733828	0.650707		3.80082	0.81497	5.19799	0.479783	3.57897	1.46422	1.6111	1.15237	1.65862	1.48134	0.821092	0.755084	1.77695	3.33985	2.3356	1.91597	1.59472	0.839052	1.15923	0.841371
16	0.264326	0.238144	0.285495	0.471649	0.575614	0.735893	0.677911		3.96707	0.703526	4.94758	0.48988	3.37497	1.38782	1.46979	1.04365	1.80787	1.0208	0.799435	0.542482	1.99509	2.82292	1.93273	2.02398	1.49892	0.653643	1.27579	0.996328
16.5	0.436422	0.22732	0.328459	0.639175	0.504674	0.730608	0.763874		3.72004	1.44185	5.35701	0.377028	3.43723	1.23113	1.57812	1.11453	1.64285	1.10401	0.787194	0.544584	1.89631	2.93718	1.79128	1.93501	1.59057	0.679697	1.12899	1.01162
17	0.221375	0.23866	0.273328	0.582474	0.606802	0.36877	0.600653		4.32681	1.61905	5.27298	0.362867	3.32219	1.2512	1.65419	1.14332	1.72098	1.09312	0.774011	0.677112	2.12551	2.99114	2.5448	1.87186	1.40903	0.684839	0.986075	1.00174
17.5	0.428976	0.251031	0.309158	0.559278	0.585929	0.740386	0.505985		3.72964	1.3998	5.64952	0.445579	3.38223	1.24835	1.44671	1.13984	1.54696	1.22645	0.795669	0.742688	1.74062	3.50343	2.0159	1.95268	1.56779	0.610965	1.01944	0.878408
18	0.264683	0.278866	0.419886	0.365979	0.538502	0.869941	0.551687		3.51554	1.56146	4.57367	0.384982	3.57286	1.22522	1.48414	1.17876	1.77111	1.12809	0.797552	0.585025	1.88827	2.88295	2.10733	1.94384	1.35632	0.519036	0.905597	0.901259
18.5	0.524023	0.26134	0.437091	0.585052	0.621445	0.678159	0.662677		3.70634	0.845803	5.04421	0.447468	3.35809	1.20936	1.65887	1.15019	1.92126	1.11348	0.752354	0.550494	1.86391	2.69254	1.92049	1.8594	1.48891	0.562765	0.836984	1.12673
19	0.484818	0.289175	0.375382	0.492268	0.647553	0.724147	0.636561		3.35901	1.24704	5.10086	0.399206	3.27799	1.28866	1.60233	1.17416	1.67836	1.1398	0.808851	0.61036	1.78757	3.59687	1.50099	1.91841	1.47476	0.603257	0.807192	0.892293
19.5	0.363558	0.277835	0.251686	0.636598	0.572852	0.325863	0.738847		3.84886	1.3594	5.08482	0.469773	3.59163	1.29392	1.56988	1.15698	1.49786	1.06273	0.891714	0.531706	2.03123	3.30642	2.08687	1.94359	1.43612	0.518609	1.11588	0.929021
20	0.281799	0.204639	0.320005	0.463918	0.536798	0.751746	0.743199		3.39386	0.846768	4.76222	0.415336	3.59001	1.22326	1.61491	1.12499	1.57092	1.8075	0.822034	0.586466	1.82135	2.57319	1.91163	2.0182	1.58676	0.65599	0.806449	1.13785
20.5	0.223571	0.20567	0.37026	0.262887	0.587678	0.692023	0.577802		4.79846	1.21585	4.94791	0.352834	3.34151	1.29238	1.59468	1.08833	1.42166	1.16434	0.809793	0.654524	1.61536	2.92183	1.87457	2.03238	1.45212	0.667165	1.11338	0.898294
21	0.30341	0.303608	0.350326	0.621134	0.537796	0.744494	0.683351		4.14453	0.874976	5.33616	0.31999	3.48839	1.32532	1.55188	1.10666	1.60084	1.04379	0.798493	0.571001	1.92744	2.30869	1.41175	2.04066	1.41055	0.682513	0.995459	0.930395
21.5	0.628956	0.261856	0.354401	0.448454	0.513883	0.611664	0.710555		3.50675	0.939558	4.94352	0.297756	3.6819	1.32763	1.61702	1.07799	1.56372	1.44614	0.827684	0.692655	1.80388	2.91381	1.85679	2.03444	1.47467	0.664443	0.836329	0.995923
22	0.361981	0.295876	0.334362	0.507732	0.400227	0.68109	0.698585		3.77544	1.03669	4.8383	0.278116	3.53901	1.31299	1.47363	1.16165	1.67037	1.52502	0.780603	0.448502	1.78457	3.01108	2.40837	2.0886	1.74581	0.665666	0.898486	0.9409
22.5	0.216092	0.276289	0.374424	0.654639	0.305297	0.500594	0.737758		3.54847	0.845869	4.3342	0.324607	3.68664	1.24689	1.54845	1.09403	1.63424	1.67786	0.782486	0.57665	1.44319	2.73886	1.99773	2.10218	1.64069	0.527348	0.953882	0.872617
23	0.302372	0.347938	0.360251	0.592784	0.250487	0.556263	0.531012		4.05169	1.67076	3.34739	0.34877	3.75762	1.16697	1.78345	1.11353	1.56937	1.0544	0.804143	0.453175	1.60197	2.79825	1.74282	2.06126	1.46359	0.574049	0.962461	0.840773
23.5	0.201725	0.302062	0.433127	0.610825	0.295934	0.407056	0.550598		3.99953	0.807764	5.49589	0.394944	3.6268	1.14863	1.57804	1.15134	1.62568	0.950427	0.725989	0.496629	1.57672	2.38347	1.64711	2.07472	1.49717	0.569833	1.08715	0.842784
24	0.188457	0.290206	0.42218	0.407216	0.269059	0.493566	0.817193		3.94314	0.944785	5.09187	0.243738	3.86933	1.33999	1.55857	1.12957	1.50173	0.924282	0.79096	0.493024	1.80859	2.5027	1.55701	2.10935	1.52496	0.494304	0.962863	0.907169
24.5	0.199346	0.203093	0.364808	0.391753	0.349516	0.419369	0.619151		4.18316	1.19491	4.73079	0.264121	3.96563	1.25695	1.54903	1.11926	1.45373	0.985322	0.838983	0.382297	1.91927	2.47258	1.78161	2.08011	1.46227	0.456107	1.20717	0.897518
25	0.229825	0.260309	0.36266	0.10567	0.377373	0.307945	0.560392		3.79997	1.20464	5.14663	0.291881	3.73858	1.2404	1.47674	1.0574	1.64932	0.912947	0.764595	0.405579	1.89807	2.67736	1.88869	2.12495	1.44275	0.604251	0.996025	1.02106
25.5	0.17409	0.236598	0.39231	0.487113	0.424094	0.316834	0.771491		4.16707	0.825485	4.81616	0.338657	3.7298	1.2486	1.536	1.09977	1.3256	0.857319	0.716573	0.429657	2.13209	2.42901	1.41133	2.1188	1.57223	0.552731	1.38122	0.822318
26	0.438241	0.203608	0.364671	0.597938	0.388424	0.359752	0.57889		4.07458	0.936642	4.71095	0.292332	3.84933	1.16989	1.53788	1.16852	1.48415	0.961428	0.801318	0.439069	1.70415	2.42901	2.15223	2.08811	1.47045	0.432238	1.20793	1.11372
26.5	0.432601	0.228351	0.374696	0.350515	0.407272	0.55147	0.601741		4.21637	1.02411	5.16056	0.324575	3.80844	1.1666	1.49234	1.09516	1.44182	0.918567	0.857815	0.459183	1.85306	2.62827	2.05958	1.95973	1.50566	0.448451	1.28126	0.868265
27	0.0458625	0.197938	0.298437	0.476804	0.314076	0.400627	0.589771		3.42267	0.73284	6.81783	0.385093	3.56739	1.11894	1.60204	1.04938	1.4569	0.83574	0.804143	0.552376	2.05686	2.89164	1.84592	1.98472	1.46004	0.495626	0.999076	0.861549
27.5	0.169333	0.241753	0.325222	0.389175	0.378862	0.279896	0.678999		4.37201	1.33656	6.19677	0.300128	3.59255	1.18735	1.50729	1.09635	1.48833	0.938064	0.718456	0.364958	1.8958	2.98589	1.76453	2.0873	1.45309	0.261131	1.01428	0.759738
28	0.215317	0.191237	0.217946	0.536082	0.359861	0.479969	0.60827		3.46573	1.14679	6.19081	0.320575	3.72558	1.07959	1.55949	1.04021	1.30606	0.863014	0.745763	0.388264	2.02662	2.54816	1.5904	2.04718	1.55692	0.262136	1.10792	0.89361
28.5	0.19219	0.198969	0.363147	0.435567	0.299081	0.300221	0.635473		3.87455	0.85252	5.34568	0.326592	3.5104	0.886398	1.37091	1.0402	1.24549	0.954565	0.673258	0.541515	1.59707	2.26626	1.92039	2.07815	1.41445	0.39362	0.936401	0.865805
29	0.228241	0.228866	0.234863	0.68299	0.332356	0.217969	0.746464		3.35498	1.11389	5.05019	0.312241	3.60195	1.08172	1.38462	1.0745	1.26195	0.837279	0.723164	0.360248	1.65715	2.65719	1.7656	2.02559	1.84419	0.38178	0.856074	0.933517
29.5	0.228868	0.249485	0.32893	0.569588	0.382254	0.130722	0.369967		3.57041	1.10725	4.97191	0.270091	3.90159	1.13259	1.4211	1.05266	1.44537	0.856713	0.758004	0.474383	1.32251	2.5225	2.36092	2.09716	1.45855	0.455836	0.964566	1.02136
30	0.517581	0.213918	0.371643	0.376289	0.301797	0.445577	0.638738		4.24543	0.895679	5.82324	0.294206	3.53448	1.07687	1.42491	1.07913	1.39953	0.899082	0.725047	0.308933	1.64654	2.62025	1.78938	2.0725	1.39794	0.180174	0.993172	0.849268

## Sheet: Peak of DAG in 0-10min,
Peak of DAG enrichment in 0-10min, on smoothed data
BSA	aIgG
1.05682	5.33468
0.826289	1.39218
0.960498	5.0387
1.01031	1
2.88186	4.25779
1	1.46745
0.985854	1.94191
	1.19025
	1.74172
	1.76613
	1.07156
	1.33066
	5.48005
	4.59114
	2.23675
	1.92036
	1.53367
	1.41213
	1.19928
	1.10617
