# Supplementary material for: Microtubules restrict F-actin polymerization to the immune synapse via GEF-H1 to maintain polarity in lymphocytes
Source: eLife journal article supplement (doi:10.7554/elife.78330), 2022-09-16
Supplement: supp [file Figure2B.xlsx]

## Sheet: Temporal data
F-actin enrichment in (2um/total ) /t0
Time (min)	BSA									aIgG
0	1	1	1	1	1	1	1			1	1	1	1	1	1	1	1	1	1	1	1	1	1	1	1	1	1	1	1	1	1	1	1	1
0.5	0.992095	0.805654	0.890688	0.700787	1.09827	1.00568	1.02424			0.837719	0.954545	0.868966	1.01293	1.02174	1.0618	1.78866	1.03448	0.995495	0.976378	1.12048	1.66834	1.06996	0.97351	1.0202	1.06704	0.97191	0.964912	0.953488	0.975728	0.935	1.33908	0.993506	1.35503	1.21557
1	1.07115	0.607774	0.862348	0.625984	1.05202	0.994318	0.963636			0.859649	1.26768	0.855172	1.20259	1.07246	0.988764	1.69588	0.993103	1.15766	1	1.35542	1.68342	1.07819	1.06623	1.02525	1.26816	0.921348	0.976608	0.837209	1.08738	0.905	1.48276	0.935065	1.02367	1.14371
1.5	1.1502	0.597173	0.82996	0.677165	1.01734	0.954545	0.969697			0.903509	1.42929	0.848276	1.25	1.19565	1.03371	1.29381	0.97931	1.13514	1.15748	1.33133	1.64824	1.05761	1.04636	1.10606	0.977654	0.966292	0.818713	0.796512	1.03883	0.835	1.53448	0.980519	0.923077	1.16168
2	1.12253	0.466431	0.785425	0.625984	0.99422	0.9375	0.951515			0.973684	1.58081	0.903448	1.22845	1.27536	1.00562	0.891753	1.0069	1.1036	1.14173	1.28916	1.46231	0.954733	1.17219	1.05556	0.877095	1.03933	0.795322	0.790698	1.02427	0.85	1.35057	1.03247	0.988166	1.22156
2.5	1.12648	0.551237	0.882591	0.566929	0.855491	0.914773	0.957576			1.01754	1.64141	1.00345	1.21983	1.4058	0.988764	0.783505	0.97931	1.02252	1.15748	1.5	1.47236	0.823045	1.22517	1.13131	0.921788	1.1236	0.783626	0.80814	1.03398	0.885	1.31034	1.11039	0.911243	1.22754
3	1.13439	0.537102	0.947368	0.633858	0.763006	0.875	0.951515			1.01754	1.79293	0.975862	1.01724	1.46377	0.966292	0.819588	0.986207	1.02703	1.14961	1.38554	1.50251	0.81893	1.29801	0.919192	0.972067	1.18539	0.824561	0.831395	1.12621	0.925	1.24138	1.20779	0.905325	1.22754
3.5	0.743083	0.314488	0.740891	0.562992	0.82659	0.857955	0.939394			0.991228	1.73232	1.05172	0.939655	1.42754	0.921348	0.742268	0.937931	1.06757	1.1811	1.41566	1.43216	0.888889	1.29801	0.919192	1.05587	1.2809	0.883041	0.883721	1.13592	0.92	1.1092	1.27922	0.87574	1.20359
4	0.735178	0.416961	0.639676	0.964567	1.08092	0.846591	0.945455			1	1.5404	0.986207	0.892241	1.42029	1.03933	0.690722	0.937931	1.1036	1.1811	1.42771	1.30151	0.950617	1.24503	0.909091	1.13408	1.30899	0.871345	0.883721	1.14078	0.955	1.08046	1.30519	0.857988	1.23353
4.5	0.699605	0.0106007	0.59919	0.874016	1.04046	0.897727	0.878788			0.921053	1.36364	0.931034	0.892241	1.47101	1.20225	0.654639	0.944828	1.0991	1.14961	1.31928	1.28643	0.901235	1.25828	0.813131	1.1676	1.2809	0.853801	0.866279	1.14078	0.885	1.02874	1.33117	0.816568	1.17964
5	0.648221	0.120141	0.538462	0.779528	0.878613	0.886364	0.830303			0.912281	1.63131	0.882759	0.823276	1.47826	0.949438	0.690722	0.986207	1.13514	1.14961	1.29518	1.29146	0.843621	1.30464	0.858586	1.19553	1.31461	0.836257	0.848837	1.1068	0.845	0.908046	1.34416	0.769231	1.1497
5.5	0.667984	0.162544	0.546559	0.80315	0.982659	0.914773	0.818182			0.912281	1.4899	0.975862	0.788793	1.54348	1.0618	0.675258	0.993103	1.15315	1.06299	1.24699	1.27638	0.897119	1.3245	0.808081	1.22346	1.28652	0.795322	0.866279	1.05825	0.87	0.925287	1.34416	0.792899	1.22156
6	0.640316	0.0742049	0.51417	0.732283	0.982659	0.914773	0.751515			0.903509	1.88384	0.986207	0.793103	1.54348	0.94382	0.597938	1.04138	1.13514	1.04724	1.16867	1.23116	0.901235	1.28477	0.79798	1.1676	1.2809	0.795322	0.825581	1.04854	0.84	0.902299	1.38312	0.816568	1.08982
6.5	0.620553	0.0812721	0.522267	0.748031	0.982659	0.846591	0.812121			0.942982	1.72727	0.948276	0.762931	1.53623	0.983146	0.783505	1.02069	1.10811	1.02362	1.19277	1.27638	0.851852	1.27152	0.833333	1.16201	1.25843	0.80117	0.598837	1.04369	0.815	0.971264	1.38961	0.869822	1.18563
7	0.624506	0.236749	0.497976	0.685039	0.867052	0.829545	0.836364			0.890351	1.68182	0.92069	0.836207	1.53623	1.04494	0.778351	1.02759	1.06306	1.03937	1.16265	1.25126	0.884774	1.27815	0.868687	1.05028	1.32022	0.754386	0.819767	1.05825	0.775	0.867816	1.37013	0.923077	1.08982
7.5	0.581028	0.212014	0.510121	0.732283	0.843931	0.823864	0.878788			0.929825	1.63636	0.92069	0.788793	1.53623	1.11236	0.865979	0.993103	1.04505	1.08661	1.18675	1.32663	0.839506	1.15232	0.838384	1.11173	1.16292	0.760234	0.784884	1.08252	0.765	0.821839	1.4026	0.994083	1.07186
8	0.592885	0.190813	0.526316	0.669291	0.774566	0.857955	0.787879			0.929825	1.54545	0.962069	0.814655	1.50725	1.14045	0.829897	0.944828	1.12162	1.07087	1.1506	1.33668	0.884774	1.25166	0.893939	1.21788	1.19101	0.77193	0.918605	1.08252	0.73	0.87931	1.42208	0.899408	1
8.5	0.596838	0.173145	0.562753	0.708661	0.971098	0.835227	0.70303			0.991228	1.4697	0.906897	0.732759	1.44203	1.18539	0.886598	0.944828	1.12613	1.07874	1.07229	1.34673	0.814815	1.23179	0.919192	0.977654	1.23596	0.77193	0.912791	1.0534	0.69	0.902299	1.45455	0.857988	1.07186
9	0.58498	0.222615	0.582996	0.850394	0.861272	0.829545	0.69697			0.97807	1.60606	0.962069	0.793103	1.44203	1.24157	0.860825	0.931034	1.06306	1.07087	1.10241	1.42714	0.860082	1.17881	0.838384	1.06704	1.16854	0.766082	0.860465	1	0.645	0.908046	1.5	0.899408	0.91018
9.5	0.58498	0.215548	0.526316	0.834646	0.890173	0.823864	0.733333			0.964912	1.69697	0.962069	0.801724	1.4058	1.1573	0.752577	0.924138	1.04505	0.952756	1.05422	1.32663	0.925926	1.2053	0.888889	1.13408	1.16854	0.760234	0.889535	1.04854	0.645	0.873563	1.50649	0.804734	1
10	0.608696	0.109541	0.550607	0.885827	0.861272	0.880682	0.630303			0.850877	1.69192	0.955172	0.75431	1.43478	1.13483	0.850515	0.903448	1.01802	1.02362	1.0241	1.38191	0.851852	1.15894	0.888889	1.11732	1.23034	0.795322	0.883721	1.1068	0.66	0.971264	1.44805	0.893491	1.0479
10.5	0.608696	0.222615	0.57085	0.783465	0.786127	0.823864	0.648485			1.02632	1.61111	1.0069	0.818966	1.43478	1.10674	0.891753	0.889655	1.0045	0.976378	0.981928	1.29146	0.893004	1.22517	0.828283	1.23464	1.24157	0.766082	0.796512	1.08252	0.65	0.798851	1.46104	0.982249	0.898204
11	0.620553	0.0918728	0.57085	0.712598	0.803468	0.795455	0.551515			1.00877	1.58586	1.01034	0.857759	1.47101	1.10112	0.78866	0.875862	0.995495	1.01575	1.01807	1.32161	0.91358	1.23179	0.762626	1.10615	1.17978	0.812865	0.77907	1.08252	0.63	0.844828	1.49351	0.911243	1.03593
11.5	0.644269	0.0848057	0.611336	0.688976	0.919075	0.767045	0.50303			0.960526	1.13131	1.12414	0.818966	1.46377	1.11798	0.845361	0.806897	0.968468	1.01575	1.0241	1.41709	0.864198	1.23179	0.787879	1.11173	1.22472	0.812865	0.831395	1.08738	0.63	0.87931	1.46753	0.899408	1.00599
12	0.675889	0.109541	0.591093	0.61811	0.855491	0.789773	0.521212			1.0307	1.4697	0.951724	0.75	1.48551	1.07865	0.840206	0.827586	0.968468	0.952756	0.96988	1.33668	0.950617	1.31788	0.828283	1.10615	1.28652	0.789474	0.761628	1.08738	0.625	0.971264	1.45455	0.881657	0.952096
12.5	0.687747	0.0954064	0.582996	0.610236	0.780347	0.761364	0.672727			1.07895	1.52525	0.962069	0.801724	1.53623	1.02809	0.829897	0.772414	0.927928	1.17323	0.945783	1.37688	0.909465	1.3245	0.808081	1.22346	1.24719	0.777778	0.709302	1.13107	0.615	0.942529	1.48052	0.905325	0.988024
13	0.70751	0.0636042	0.558704	0.582677	0.699422	0.784091	0.581818			1.0614	1.67677	1.05172	0.788793	1.51449	1.05618	0.907216	0.806897	0.963964	1.20472	0.921687	1.31658	0.90535	1.29801	0.80303	1.02235	1.36517	0.80117	0.651163	1.12136	0.595	0.977011	1.53247	0.899408	0.856287
13.5	0.72332	0.113074	0.530364	0.562992	0.65896	0.840909	0.557576			1.09211	1.70707	1.16207	0.814655	1.46377	1.07303	0.835052	0.737931	0.972973	1.24409	0.891566	1.34171	0.917695	1.23179	0.752525	1.10056	1.27528	0.760234	0.656977	1.16505	0.585	0.948276	1.5	0.911243	1.04192
14	0.73913	0.399293	0.566802	0.57874	0.676301	0.778409	0.490909			0.995614	1.66162	0.993103	0.836207	1.42029	0.97191	0.958763	0.77931	0.95045	1.2126	0.873494	1.33668	0.897119	1.21854	0.777778	1.17877	1.32584	0.783626	0.662791	1.07767	0.585	1	1.44156	0.923077	1.01198
14.5	0.735178	0.339223	0.522267	0.633858	0.641618	0.806818	0.466667			0.986842	1.28283	1.01724	0.801724	1.45652	0.955056	0.938144	0.772414	0.945946	1.23622	0.885542	1.35678	0.876543	1.23841	0.79798	1.07263	1.2809	0.830409	0.69186	1.09223	0.56	0.95977	1.31818	0.863905	0.868263
15	0.747036	0.325088	0.518219	0.523622	0.589595	0.761364	0.509091			1.02632	1.42424	0.937931	0.818966	1.41304	1	0.860825	0.786207	0.905405	1.14961	0.891566	1.27136	0.909465	1.29139	0.772727	1.08939	1.2191	0.818713	0.633721	1.04854	0.57	0.936782	1.25974	0.893491	0.874251
15.5	0.747036	0.226148	0.554656	0.527559	0.641618	0.75	0.612121			0.929825	1.5303	0.948276	0.775862	1.42029	1	0.85567	0.772414	0.914414	1.12598	0.885542	1.39698	0.909465	1.27152	0.79798	1.13966	1.22472	0.789474	0.511628	1.03398	0.56	0.954023	1.18831	0.87574	0.988024
16	0.750988	0.293286	0.530364	0.570866	0.653179	0.772727	0.715152			1.07456	1.32323	1.01034	0.784483	1.44203	0.94382	0.92268	0.717241	0.914414	1.1811	0.909639	1.32663	0.967078	1.3245	0.823232	1.02793	1.19663	0.888889	0.5	1.10194	0.58	1.00575	1.13636	0.887574	1.0479
16.5	0.754941	0.30742	0.578947	0.531496	0.722543	0.801136	0.769697			1.15351	1.37879	0.875862	0.767241	1.37681	0.994382	0.891753	0.717241	0.90991	1.16535	0.981928	1.24121	0.897119	1.27152	0.838384	1.07821	1.21348	0.766082	0.453488	1.08252	0.505	0.931034	1.02597	0.940828	1.02994
17	0.762846	0.339223	0.54251	0.559055	0.653179	0.8125	0.854545			1.03947	1.57576	0.97931	0.784483	1.39855	1.02809	0.845361	0.696552	0.963964	1.11811	0.945783	1.28141	0.91358	1.35099	0.813131	0.988827	1.11236	0.777778	0.401163	1.08738	0.435	0.942529	1.06494	0.822485	0.958084
17.5	0.766798	0.339223	0.550607	0.523622	0.682081	0.778409	0.921212			0.907895	1.44949	0.848276	0.788793	1.39855	1.06742	0.809278	0.737931	0.968468	1.10236	0.975904	1.27638	0.950617	1.19205	0.742424	1.09497	1.17978	0.766082	0.383721	1.1068	0.485	0.913793	1.05195	0.846154	1.04192
18	0.774704	0.342756	0.574899	0.53937	0.624277	0.732955	0.854545			0.973684	1.29798	0.889655	0.793103	1.38406	1.03371	0.804124	0.703448	0.905405	1.12598	0.963855	1.23618	0.901235	1.17219	0.787879	1	1.20787	0.812865	0.406977	1.07767	0.49	0.988506	1.01948	0.881657	0.928144
18.5	0.778656	0.0777385	0.493927	0.566929	0.606936	0.715909	0.793939			1	1.31818	0.9	0.775862	1.37681	1.04494	0.845361	0.62069	0.905405	1.28346	0.933735	1.21106	0.909465	1.15894	0.777778	1.15642	1.15169	0.766082	0.383721	1.09709	0.44	0.988506	1.01299	0.769231	0.874251
19	0.774704	0.113074	0.595142	0.590551	0.606936	0.721591	0.739394			1.01754	1.4798	0.962069	0.784483	1.37681	1.04494	0.917526	0.655172	0.945946	1.2126	0.933735	1.26131	0.946502	1.11258	0.858586	1.06145	1.11236	0.754386	0.372093	1.1699	0.48	0.913793	1.01948	0.786982	0.97006
19.5	0.786561	0.371025	0.651822	0.582677	0.67052	0.738636	0.812121			0.969298	1.58081	0.965517	0.806034	1.33333	1.10674	0.902062	0.627586	0.981982	1.19685	0.903614	1.26633	0.938272	1.05298	0.80303	1.02235	1.15169	0.783626	0.372093	1.15049	0.455	0.87931	1.01948	0.798817	0.976048
20	0.782609	0.321555	0.643725	0.555118	0.693642	0.744318	0.757576			0.973684	1.34343	1.08966	0.797414	1.31884	1.08989	0.824742	0.641379	0.981982	1.17323	0.873494	1.23116	0.930041	1.17219	0.79798	1.17318	1.17416	0.80117	0.348837	1.13107	0.415	0.83908	0.974026	0.846154	0.868263
20.5	0.786561	0.371025	0.615385	0.559055	0.676301	0.710227	0.745455			0.960526	1.27273	0.917241	0.831897	1.36957	1.09551	0.917526	0.57931	0.954955	1.20472	0.903614	1.23618	0.954733	1.0596	0.717172	1.09497	1.05618	0.877193	0.354651	1.06311	0.42	0.850575	0.980519	0.923077	0.826347
21	0.794466	0.388693	0.59919	0.570866	0.647399	0.704545	0.769697			0.912281	0.949495	0.896552	0.840517	1.38406	1.24157	0.871134	0.586207	0.954955	1.23622	0.993976	1.23618	0.950617	1.05298	0.757576	1.02793	1.07865	0.918129	0.366279	1.16505	0.45	0.913793	0.954545	0.911243	0.88024
21.5	0.786561	0.261484	0.611336	0.633858	0.606936	0.75	0.824242			0.890351	0.782828	0.993103	0.797414	1.33333	1.17416	0.958763	0.537931	0.896396	1.25197	0.921687	1.24121	0.909465	1.19205	0.747475	1.08939	1.19101	0.935673	0.372093	1.12136	0.44	0.873563	0.876623	0.846154	0.868263
22	0.798419	0.169611	0.603239	0.602362	0.595376	0.755682	0.733333			0.894737	0.712121	0.872414	0.788793	1.39855	1.06742	0.93299	0.482759	0.878378	1.29134	0.89759	1.23618	0.946502	1.03974	0.782828	1.01117	1.16292	0.906433	0.348837	1.04369	0.425	0.87931	0.915584	0.828402	0.952096
22.5	0.798419	0.29682	0.550607	0.641732	0.624277	0.659091	0.715152			0.846491	0.848485	1.00345	0.780172	1.42029	1.17978	0.865979	0.510345	4.5045045045045*	1.25197	0.903614	1.25628	0.962963	1.15894	0.792929	0.977654	1.16854	0.847953	0.366279	1.06796	0.44	0.954023	0.876623	0.857988	0.874251
23	0.802372	0.275618	0.566802	0.507874	0.705202	0.670455	0.684848			0.912281	0.964646	0.896552	0.818966	1.44203	1.17416	0.912371	0.537931	0.927928	1.15748	0.885542	1.34673	0.934156	1.00662	0.742424	1.09497	1.20787	0.824561	0.395349	1.15049	0.45	0.908046	0.922078	0.846154	0.814371
23.5	0.802372	0.385159	0.558704	0.551181	0.601156	0.681818	0.715152			0.903509	0.823232	0.917241	0.801724	1.42029	1.11798	1.00515	0.558621	0.927928	1.29921	0.885542	1.32161	0.962963	0.980132	0.747475	1.14525	1.17416	0.812865	0.412791	1.07767	0.47	0.925287	0.922078	0.846154	0.742515
24	0.798419	0.173145	0.51417	0.543307	0.722543	0.676136	0.757576			1.03509	1.22222	1.03448	0.793103	1.39855	1.14607	0.902062	0.544828	0.95045	1.13386	0.921687	1.29146	0.950617	1.03974	0.671717	1.04469	1.11236	0.754386	0.372093	1.11165	0.435	0.896552	0.876623	0.83432	0.922156
24.5	0.814229	0.127208	0.526316	0.570866	0.67052	0.659091	0.757576			0.938596	0.792929	0.962069	0.806034	1.3913	1.15169	1	0.537931	0.941441	1.14961	0.927711	1.30653	0.987654	1.00662	0.717172	0.988827	1.10112	0.719298	0.395349	1.1165	0.4	0.913793	0.88961	0.822485	0.754491
25	0.818182	0.0706714	0.574899	0.586614	0.578035	0.664773	0.751515			0.868421	0.858586	0.948276	0.810345	1.41304	1.11236	0.850515	0.531034	0.954955	1.16535	0.951807	1.28141	0.971193	1.07285	0.747475	1	1.12921	0.80117	0.348837	1.07767	0.375	0.821839	0.88961	0.911243	0.988024
25.5	0.806324	0.0883392	0.574899	0.559055	0.601156	0.636364	0.878788			0.899123	0.838384	0.955172	0.793103	1.42754	1.10112	0.670103	0.503448	4.5045045045045*	1.05512	0.891566	1.36181	0.971193	1.02649	0.808081	1.03911	1.07865	0.824561	0.337209	1.12621	0.425	0.87931	0.883117	0.863905	0.832335
26	0.814229	0.106007	0.595142	0.582677	0.682081	0.659091	0.860606			0.894737	0.767677	0.951724	0.780172	1.47826	1.15169	0.634021	0.524138	0.846847	1.17323	0.909639	1.23116	0.995885	0.900662	0.79798	1.05587	1.08427	0.74269	0.366279	1.10194	0.4	0.83908	0.857143	0.893491	0.91018
26.5	0.814229	0.123675	0.607287	0.594488	0.786127	0.636364	0.915152			0.899123	0.858586	0.87931	0.806034	1.41304	1.16292	0.783505	0.565517	0.869369	1.29921	0.903614	1.27638	0.954733	0.913907	0.752525	0.916201	1.07303	0.795322	0.337209	1.10194	0.41	0.948276	0.837662	0.911243	0.826347
27	0.806324	0.176678	0.631579	0.629921	0.734104	0.647727	0.933333			0.864035	0.939394	0.893103	0.775862	1.35507	1.17978	0.747423	0.6	0.90991	1.1811	0.86747	1.30653	0.942387	1	0.767677	1.03911	1.05056	0.836257	0.331395	1.07282	0.38	0.890805	0.883117	0.893491	0.802395
27.5	0.818182	0.201413	0.688259	0.65748	0.676301	0.613636	0.709091			0.899123	0.969697	0.941379	0.75431	1.34058	1.10674	0.835052	0.593103	0.927928	1.19685	0.981928	1.29146	0.938272	1.00662	0.80303	1	1.07303	0.80117	0.337209	1.06796	0.41	0.867816	0.863636	0.751479	0.820359
28	0.822134	0.268551	0.688259	0.61811	0.66474	0.647727	0.836364			0.925439	0.944444	0.993103	0.801724	1.37681	1.14045	0.721649	0.572414	0.914414	1.19685	0.927711	1.18593	0.91358	1.09934	0.762626	0.949721	1.02247	0.748538	0.325581	1.11165	0.4	0.804598	0.876623	0.763314	0.874251
28.5	0.822134	0.268551	0.643725	0.610236	0.618497	0.613636	0.806061			0.864035	1.27273	1.11034	0.814655	1.41304	1.14607	0.597938	0.593103	0.936937	1.17323	0.921687	1.19095	0.930041	1.11921	0.742424	0.960894	0.994382	0.736842	0.313953	1.0534	0.395	0.833333	0.896104	0.857988	0.844311
29	0.822134	0.275618	0.611336	0.602362	0.566474	0.642045	0.854545			0.885965	1.10606	1.01724	0.780172	1.3913	1.1573	0.757732	0.544828	0.86036	1.16535	0.909639	1.21608	0.99177	1.07947	0.787879	1.06704	0.983146	0.736842	0.360465	1.02913	0.355	0.873563	0.88961	0.846154	0.814371
29.5	0.837945	0.219081	0.591093	0.594488	0.526012	0.647727	0.824242			0.885965	0.929293	0.986207	0.801724	1.42029	1.08989	0.634021	0.544828	0.873874	1.24409	0.975904	1.16583	1.02881	1.05298	0.787879	0.960894	0.988764	0.77193	0.30814	1.00971	0.38	0.890805	0.857143	0.822485	0.754491
30	0.826087	0.19788	0.526316	0.629921	0.491329	0.704545	0.781818			0.942982	0.90404	1.88966	0.74569	1.36957	1.11236	0.798969	0.544828	0.833333	1.27559	0.945783	1.20101	0.971193	1.01325	0.833333	0.949721	1.05056	0.777778	0.30814	1.03883	0.365	0.873563	0.863636	0.727811	0.844311

## Sheet: Peak of F-actin in 0-10min,
Peak of F-actin enrichment in 0-10min, on smoothed data
BSA	aIgG
1.12648	1.69588
1	1.02069
0.947368	1.13514
0.874016	1.1811
1.05202	1.41566
1	1.66834
1	1.06996
	1.30464
	1.05556
	1.19553
	1.28652
	1
	1
	1.14078
	0.995
	1.48276
	1.5
	1.02367
	1.22754
	1.01754
	1.73232
	0.986207
	1.22845
	1.54348
	1.18539
