# Supplementary material for: Microtubules restrict F-actin polymerization to the immune synapse via GEF-H1 to maintain polarity in lymphocytes
Source: eLife journal article supplement (doi:10.7554/elife.78330), 2022-09-16
Supplement: supp [file Figure2C.xlsx]

## Sheet: Temporal data
Centrosome-droplet distance (µm)
Time (min)	BSA														aIgG
0	3.771	1.172	2.864	3.989	4.649	0.7	0	5.859	2.864	1.885	1.546	3.358	0.325		2.366	1.799	3.868	0	0.325	5.139	9.092	8.155	6.948	6.737	6.93	5.579	0.727	4.831	2.38	3.162	2.77	3.162	5.993	6.737	3.25	4.207	3.989	4.562	2.072
0.5	3.419	1.799	3.386	3.927	1.577	1.2	0.46	3.728	1.476	2.62	2.02	7.851	0		3.393	2.366	4.053	0.325	0	5.759	1.028	2.171	6.349	6.072	7.329	6.248	2.796	6.016	6.775	2.68	2.712	3.584	5.094	7.845	2.62	4.237	4.053	5.045	2.275
1	2.02	14.613*	3.539	3.927	4.999	0.955	0.325	1.613	0.325	4.729	13.18*	7.458	14.083*		3.954	2.68	5.247	0	0	5.859	6.166	2.572	6.024	4.859	5.98	5.972	0.65	5.38	3.914	2.62	2.77	3.771	5.406	8.151	3.5	4.295	3.961	5.859	2.467
1.5	3.387	1.95	4.561	3.967	5.337	0.65	0	1.2	3.634	5.291	5.409	8.887	13.797*		3.008	2.68	4.283	0	0	5.139	4.925	0	6.538	4.596	6.316	6.184	1.625	5.424	4.336	2.467	3.243	3.643	4.55	7.64	3.387	4.925	4.727	4.968	3.083
2	2.62	4.886	3.57	3.79	5.855	0.919	1.172	3.728	2.62	6.662	1.675	8.951	2.99		1.95	2.62	15.768*	0	0.325	4.42	7.337	0	5.931	3.59	4.58	5.85	0.325	5.448	6.7	2.925	2.366	3.59	3.575	6.737	3.162	4.569	5.719	4.875	3.077
2.5	1.34	1.625	3.465	3.387	5.525	2.344	0	2.402	4.132	4.015	3.962	9.161	2.145		2.943	2.402	15.774*	0	0.975	4.111	3.7	1.613	4.968	1.977	4.283	5.247	0.727	5.24	3.868	3.868	1.769	3.961	3.598	6.513	4.144	5.424	3.277	5.186	2.99
3	2.712	4.562	2.882	3.393	2.882	1.243	0	5.021	4.111	3.59	2.467	9.04	0.772		2.055	0.65	14.674*	0	0.325	4.882	3.804	0	4.784	1.3	3.804	4.653	0.325	4.999	2.171	3.914	1.028	3.575	3.465	5.966	2.864	4.463	3.59	3.954	2.055
3.5	2.29	4.596	4.706	4.111	2.29	1.769	0.325	4.706	6.024	5.38	4.476	5.266	2.125		0.975	2.171	255*	0	0.325	4.732	0	1.2	4.972	0.65	2.344	4.615	0.325	4.581	3.771	3.554	0.325	2.68	3.277	5.287	2.055	3.894	2.38	1.895	0.325
4	1.546	4.237	4.739	3.266	6.618	4.649	0	5.082	2.996	6.595	4.706	9.678	1.365		0.955	1.799	2.925	0.325	0.65	4.706	0	1.625	4.732	0.325	1.172	4.392	0.46	4.831	1.512	3.853	0.325	2.097	2.777	4.237	1.2	4.569	1.243	2.055	0.325
4.5	4.156	3.59	4.739	4.225	5.727	2.18	0.919	4.784	2.864	6.332	5.425	12.716	2.145		0.325	1.657	2.6	0	0.65	4.02	0	0	4.706	0	0.65	4.17	0.325	4.569	1.028	3.325	0.65	1.34	2.055	2.758	0.975	3.293	1.512	1.625	0.772
5	4.476	3.57	6.045	3.771	6.106	4.591	0	6.277	2.145	7.8	3.346	3.957	1.977		0	1.769	1.75	0	0	3.706	0	0.325	3.643	0	0	3.962	0	4.225	0.975	2.693	0.325	0.975	0.975	2.18	0.325	3.515	1.769	1.3	0.325
5.5	4.195	3.771	5.92	3.5	5.569	5.676	5.859*	6.7	3.539	7.536	5.814	5.779	2.572		0.325	1.3	1.75	0.46	0.65	3.634	5.737	1.172	3.575	0.65	0.65	3.34	0	3.771	0.65	2.6	0	3.162*	1.3	1.172	1.34	3.293	15.294*	0.65	0.325
6	6.57	3.914	4.672	3.854	5.38	5.246	0	10.549	4.17	7.516	2.538	4.441	2.422		0.46	1.34	2.996	0.919	1.3	2.864	4.999	0	3.25	0.325	0.325	2.925	0	3.325	0.325	2.275	0.46	0.65	0.65	1.172	1.172	3.077	1.544	0	0
6.5	2.758	3.868	4.591	3.277	5.859	4.827	1.172	9.755	6.332	6.61	6.128	3.25	3.405		0.727	1.172	3.57	0.919	0.325	3.634	6.922	0.325	2.275	0	0	3.077	0	2.298	0	0.46	0.65	0.919	0.65	1.028	0.975	3.346	0.727	0	0
7	2.02	4.17	3.515	3.59	6.072	4.936	0.325	9.59	1.799	6.657	4.799	4.101	1.009		0	2.097	2.68	0	0.325	3.575	6.137	2.996	1.95	0	0	1.95	0	2.055	0	0.325	0.325	0.727	0.65	0.919	1.3	3.25	0	0	0.325
7.5	2.758	3.634	4.234	3.314	4.849	2.712	1.895	9.152	4.225	6.983	4.637	10.667*	1.476		0	1.75	3.077	0.65	1.476	2.275	0	0	1.3	0	0	1.95	0	1.75	0	0	0	0.919	0.975	0.919	0.727	2.402	0.919	0	1.172
8	2.882	3.314	3.957	2.864	4.416	2.29	1.028	9.431	4.784	6.406	0.975	3.466	1.885		0	2.171	4.17	0.65	0.65	2.055	3.419	4.257	0.975	0	0	1.3	0	1.34	0.325	0	0.325	0.46	0.325	0.65	0	2.196	1.453	0	0
8.5	2.758	3.59	5.177	3.7	0	0.837	0.975	5.287	5.85	6.775	5.775	2.081	1.737		0.46	2.572	4.17	0	1.453	1.613	0	0.955	0.975	0	0	0.65	0	1.172	0.325	0.325	0	0.975	0.65	0.325	0	1.625	1.625	0	0
9	3.743	3.465	3.127	2.907	3.277	2.6	1.476	8.803	5.569	6.154	3.277	1.365	2.633		0	1.625	4.081	0	0.727	1.613	0	8.09	0.65	0	0	0.65	0.65	1.613	0.65	0	0	0.65	0.919	0.46	0.46	2.18	0.919	0	0
9.5	3.584	3.7	3.927	3.25	0	4.283	1.3	8.578	4.968	5.846	6.007	3.894	2.198		0.325	1.75	3.914	0	1.028	1.75	0	7.825	0	0	0	0.65	0	1.75	0	0	0.65	0.955	0	0.325	0	1.625	1.613	0	0
10	3.5	3.914	4.156	3.162	0	5.475	0.975	9.431	6.215	5.654	2.591	4.428	2.311		0.325	1.95	3.25	0	1.3	1.34	4.653	0.65	0.325	0	0	0	0	0.919	0.46	0	0.325	1.028	0.727	0.325	0.325	1.769	1.512	0	0
10.5	2.68	3.387	2.996	4.132	0	0.65	1.028	2.475	4.882	5.579	5.297	11.148*	2.38		0	1.799	3.9	0.46	1.3	1.625	7.858	5.21	0.325	0	0	0.65	0	0.727	0	0	0	1.028	0.325	0.325	0.65	1.625	2.196	0	0
11	4.152	3.266	2.864	4.02	0	1.769	0.65	9.514	2.475	5.247	6.172	5.287	2.02		0	1.895	4.225	0.46	2.402	1.453	6.033	7.035	0.325	0	0	0.325	0	0.325	0	0	0	0.65	0.325	0	0.325	1.155	7.192	0	0
11.5	3.494	4.706	3.784	3.954	0	3.7	2.171	10.205	4.225	5.7	4.428	5.425	2.591		0	1.34	3.634	0.325	1.95	2.18	0	0	0	0	0.325	0	0	0	0.325	0	0.325	0.955	0	0.727	0	0	6.651	0	0
12	3.145	3.634	4.36	3.804	0.325	0.325	2.18	4.972	1.895	5.563	3.634	3.77	2.38		0	1.243	2.925	0	2.712	2.055	2.62	0	0.325	0	0	0	0	0	0	0	0	1.2	0	0	0	0.727	2.38	0	0.325
12.5	3.967	2.925	3.419	3.868	0	0	0.325	9.333	4.55	6.538	8.877	4.081	1.838		0	1.3	2.925	0	2.671	1.625	4.882	0.325	0.325	0	0	0	0	0	0.65	0	0	1.009	0	0.325	0	0	6.689	0	0
13	3.914	3.706	3.854	3.914	2.864	0.65	0.65	2.275	3.914	7.452	3.634	2.508	2.712		0	1.512	3.387	0	0.46	1.453	0	0.325	0	0	0	0	0	0	0	0	0.325	0.325	0.325	0	0	0	1.95	0	0
13.5	4.111	3.465	3.494	3.771	0.325	0.65	1.453	9.59	6.05	8.162	3.677	2.401	1.379		0	1.625	3.914	0	0.65	1.977	1.3	6.856	0	0	0	0	0	0	0.325	0	0	0.727	0	0.325	0.325	0	1.75	0	1.028
14	4.02	4.275	4.476	4.653	1.453	3.659	0.65	8.228	6.93	7.154	9.202	3.217	2.169		0	2.366	3.868	0	0.955	2.475	1.3	2.298	0	0	0	0	0	0	0.65	0	0.46	1.243	0	0	0	0	1.2	0	0
14.5	3.226	3.954	2.864	3.914	0	6.385	3.077	5.287	3.325	7.351	5.448	4.152	1.243		0	1.885	4.015	0	1.95	2.366	0	2.275	0	0	0	0	0	0	0.325	0	0.325	0.65	0	0.65	0	0	0.955	0	0
15	3.869	3.706	3.201	4.784	2.081	2.925	3.025	6.5	6.291	8.398	9.804	3.627	1.577		0	2.366	4.275	0	0.975	1.95	1.657	2.275	0	0	0	0	0.919	0	0.325	0	0	0.65	0	0.46	0.975	0	1.675	0	1.34
15.5	3.277	4.562	3.784	3.59	2.081	3.325	2.925	5.846	3.266	7.771	10.142	4.463	2.675		0	2.29	4.17	0	1.625	1.75	2.907	2.62	0	0	0	0	0	0	0.325	0	0	0.975	0	0	0.975	0	0.65	0	0
16	2.864	2.943	4.999	3.657	2.298	3.293	1.3	5.021	3.314	7.951	3.976	2.691	1.476		0	1.476	3.954	0	1.613	0.46	0	0	0	0	0	0	0	0	0	0	0	0.727	0	0.325	0	0	0	0	0.325
16.5	2.996	4.225	2.907	4.476	0	3.634	2.072	4.581	5.022	6.983	3.743	2.344	2.864		0	1.885	4.156	0	1.625	1.3	2.6	0	0	0	0	0	0	0	0	0	0	0.65	0	0	0	0	0	0	0
17	5.563	4.42	3.307	3.634	0.65	2.712	1.476	4.882	6.223	8.313	3.914	3.246	2.171		0	1.657	4.581	0	0.65	0.65	2.864	0.325	0	0	0	0	0	0	0	0	0	0.727	0	0.325	0	0	4.283	0.727	0
17.5	4.259	5.654	3.771	3.008	2.081	2.77	2.055	11.449	4.237	9.298	5.829	2.777	2.671		0	1.028	4.257	0	1.95	1.977	2.943	0	0	0	0	0	0	0	0	0	0	0.325	0	0.325	0	0	1.799	0	0
18	3.627	5.406	4.345	4.225	3.325	1.769	1.657	6.072	4.451	8.862	3.934	3.25	3.643		0	1.625	4.882	0	1.028	0	4.162	0.975	0	0	0	0	0	0	0	0	0	0.325	0	0.325	0.325	0	0.772	0	0
18.5	5.021	6.184	3.11	4.295	3.346	6.016	1.3	5.61	6.175	9.185	5.33	2.145	2.508		0	1.2	4.999	0	1.476	0.919	1.95	0	0	0	0	0	0	0	0	0	0	0.325	0	0	0	0	1.243	0	0.727
19	5.535	5.139	3.634	2.943	2.572	2.712	1.3	6.31	8.45	8.591	3.976	3.024	2.38		0	2.6	4.882	0	1.476	0.325	0.727	0	0	0	0	0	0	0	0	0	0	0.325	0	0	0.65	0	0	0	0.46
19.5	4.936	4.194	4.17	4.55	2.572	3.083	1.2	3.575	1.95	7.757	4.391	2.671	3.358		0	1.75	4.596	0	1.625	0.65	1.172	0	0	0	0	0	0	0	0.325	0	0	0.955	0	0.325	0.919	0	0.919	0	0.325
20	4.886	4.194	4.132	3.9	2.796	1.453	1.95	4.772	4.02	7.536	3.677	1.476	4.541		0	1.799	3.634	0	1.625	0.325	1.172	0	0	0	0	0	0	0	0	0	0	0.325	0	0.46	0.65	0	2.475	0	0.65
20.5	4.596	3.387	4.463	3.868	6.887	0.837	0.975	5.654	5.85	7.001	5.676	1.91	3.277		0	2.171	1.977	0	1.769	0.46	1.34	1.028	0	0	0	0	0	0	0	0	0	0.325	0	0.325	0	0	0	0	0
21	3.254	2.925	4.968	4.02	2.366	2.925	1.512	5.525	6.868	7.633	5.685	2.402	2.38		0	1.625	2.777	0	0.955	0.325	1.625	0.65	0	0	0	0	0	0	0	0	0	0.65	0	0	0.325	0	0	0	0
21.5	3.598	4.392	2.965	2.925	0	3.083	1.476	4.596	3.9	8.006	4.569	2.081	3.73		0	1.34	4.081	0	0.975	0.65	2.572	0.975	0	0	0	0	0	0	0	0	0	0.65	0	0	0.325	0.325	0	0	0.325
22	4.081	3.853	3.494	3.59	0	3.771	1.2	9.362	4.761	11.148	2.882	1.365	3.953		0	1.243	3.277	0	0.65	0	2.572	0.919	0	0	0	0	0	0	0	0	0	0.325	0	0.65	0	0	0	0	0.65
22.5	4.875	4.562	3.771	3.954	0	2.99	0.65	6.93	4.875	10.469	3.201	3.728	4.156		0	1.3	3.201	0	0.325	0.325	0.46	0	0	0	0	0	0	0	0	0	0	0.727	0	0	0.325	0	0.46	0.325	0
23	4.788	4.283	4.98	4.225	0	2.68	1.3	2.467	6.508	8.392	3.419	2.758	2.734		0	1.243	2.467	0	0	0	0.325	4.476	0	0	0	0	0	0	0	0	0	0.727	0	0	0	0	0	0	0
23.5	4.02	4.392	5.287	3.5	0	0.772	2.055	11.741	5.85	9.168	5.045	1.474	1.967		0	1.34	2.943	0	0	0	0	3.839	0	0	0	0	0	0	0	0	0	0.975	0	0	0	0	0	0	0.325
24	3.473	4.463	5.165	4.02	0	2.6	1.95	11.718	5.654	6.206	4.875	1.675	6.651		0	1.172	2.6	0	0.65	0	0.727	4.875	0	0	0	0	0	0	0	0	0.325	0.65	0	0	0.325	0.325	0	0	0
24.5	4.55	4.225	4.974	3.706	0	3.634	1.3	10.446	7.016	5.38	4.738	1.3	7.667		0	1.799	1.977	0	1.2	0.325	0.975	3.643	0	0	0	0	0	0	0	0	0	0.975	0	0	0	0.325	0	0	0
25	4.776	2.572	4.451	4.02	0.325	2.467	2.072	7.939	4.918	5.625	4.283	1.544	5.95		0	1.34	2.572	0	1.95	0	0.975	0.325	0	0	0	0	0	0	0	0	0	0.325	0	0.325	0	0	0	0	0
25.5	5.569	4.968	4.453	4.156	3.634	2.693	1.3	7.508	6.825	5.709	3.419	1.365	5.572		0	1.028	2.572	0	1.95	0.325	0.325	0	0	0	0	0	0	0	0	0	0.65	0.975	0	0	0	0	0	0.325	0
26	4.776	4.615	5.625	3.7	0	3.008	1.3	8.672	9.23	5.236	6.181	1.769	8.594		0	0.975	2.943	0	1.2	0.325	0	0	0	0	0	0	0	0	0	0	0	0.65	0	0	0	0	0	0	0.325
26.5	4.653	4.968	5.377	4.225	0.727	4.225	0.727	5.045	7.831	6.595	3.961	1.613	7.605		0	0.65	3.554	0	0	0	0	0	0	0	0	0	0	0	0	0	0	0.325	0	0	0	0	0	0	0.46
27	4.787	3.868	4.653	3.954	0.65	3.643	1.453	7.571	4.081	6.323	5.287	10.179*	4.429		0	0.727	2.6	0	0.975	0	0	0	0	0	0	0	0	0	0	0	0	0.65	0	0	0	0	0	0	0
27.5	5.777	4.111	3.627	3.868	0	3.266	0.919	4.653	3.387	5.607	3.201	11.278*	2.899		0	0.325	2.298	0	0.325	0.325	0	0	0	0	0	0	0	0	0	0	0	0.325	0	0	0	0	1.155	0	0
28	5.667	3.976	4.416	3.894	1.625	2.712	1.613	6.215	5.554	5.85	3.554	10.645*	2.971		0	0.955	2.68	0	0	0.325	0	0.325	0	0	0	0	0	0	0	0	0	0.325	0	0	0.325	0	0	0	0.325
28.5	5.572	4.562	4.259	3.954	6.128	3.9	1.75	5.247	2.401	5.927	3.201	10.818*	2.777		0	0.325	2.298	0	0	0.46	1.769	0	0	0	0	0	0	0	0	0.325	0.325	0.325	0	0	0.325	0	0	0	0
29	5.014	3.657	3.989	4.225	1.706	2.925	1.75	6.856	2.693	6.332	4.556	10.108*	3.11		0	0.325	3.25	0	0	0	0	0	0	0	0	0	0	0	0	0	0	0.325	0	0	0	0	0	0	0
29.5	5.014	4.732	4.343	4.343	1.625	3.7	0.65	7.15	3.25	6.538	4.569	9.198*	2.956		0	0	2.275	0	0	0	0	0	0	0	0	0	0	0	0	0	0	0	0	0.65	0	0	0	0	0.325
30	4.886	3.575	3.307	4.295	2.02	3.927	2.275	6.248	5.087	6.649	3.634	1.365	3.989		0	0	1.977	0	0	0	0	0	0	0	0	0	0	0	0	0	0	0.325	0	0.325	0	0	0	0	0.325
Average distance 25-30 min	5.13555	4.14582	4.40909	4.05764	1.67636	3.31509	1.43718	6.64582	5.02336	6.03555	4.16782	1.5312	4.62291		0	0.604545	2.63809	0	0.581818	0.16	0.279	0.0590909	0	0	0	0	0	0	0	0.0295455	0.0886364	0.413636	0	0.118182	0.0590909	0	0.105	0.0295455	0.16
