# Supplementary material for: Microtubules restrict F-actin polymerization to the immune synapse via GEF-H1 to maintain polarity in lymphocytes
Source: eLife journal article supplement (doi:10.7554/elife.78330), 2022-09-16
Supplement: supp [file Figure2D.xlsx]

## Sheet: Temporal data
Golgi Apparatus-droplet distance (µm)
Time (min)	BSA														aIgG
0	7.98178	7.85265	3.7289	2.80342	7.35749	7.8806	8.4352	2.5884	6.00096	2.29986	6.90939	4.73199			5.83662	3.88643	3.62699	9.19471	4.56283	2.97477	6.88624	8.65449	5.17064	7.07937	6.50056	6.4135	3.53333	4.25171	8.92568	5.78785	3.19256	4.96154	4.80303
0.5	10.4596158783944*	8.31753	2.96495	1.13201	7.089	7.87739	9.51005	3.446	5.5267	2.20696	5.93398	5.8486			6.07094	3.99103	3.35931	9.52961	4.61119	3.45392	7.43074	8.74359	5.65247	6.98572	7.59144	3.36763	3.93879	4.22238	7.71884	3.84656	2.12103	5.53228	4.83867
1	6.56605	7.05547	3.58639	1.6894	6.73233	8.85988	9.27092	3.41734	6.32575	3.08316	6.01072	6.65229			6.88582	4.59792	3.78509	9.47985	5.21605	2.45908	6.69942	8.89384	5.38165	6.27261	6.97842	5.83438	3.51444	4.36108	8.48421	3.5259	2.30891	5.47204	4.96524
1.5	6.67049	6.82678	5.41884	1.90143	6.62451	7.63619	10.1999	3.67108	6.52684	4.15427	6.07711	5.97817			6.30554	5.41189	3.24401	11.0868	4.35513	2.99664	4.68922	8.4054	5.36462	6.37968	6.61891	5.83858	4.49252	4.09709	9.06827	2.63292	2.1788	5.58754	4.94135
2	6.89477	6.7506	4.64304	1.97621	6.46652	7.1722	9.73003	4.29356	6.40108	3.81164	6.65984	4.91071			6.51422	4.96331	3.62279	11.6586	3.79227	2.9242	5.05776	8.3431	5.1508	6.27145	5.6504	5.82484	5.41837	3.49921	8.64867	2.24323	2.37887	5.58068	5.05888
2.5	5.49244	6.3462	3.52397	2.4251	6.14067	7.52272	9.21464	3.51548	6.1124	4.31355	6.51597	4.91702			7.44412	5.30655	4.56929	11.5497	2.83334	2.55255	4.18078	7.50238	5.50822	5.42329	4.62094	5.77942	5.82544	3.62161	8.55087	2.63105	2.37255	4.88017	5.11348
3	5.38526	6.62711	4.5077	1.86608	6.89831	8.03298	9.86932	3.76191	6.5903	3.65758	6.66859	4.17225			7.71015	5.3812	4.13088	11.3445	2.30151	2.01477	5.42685	8.1734	5.32337	4.95062	3.75843	6.06657	5.88226	3.3088	8.06789	3.20028	2.23497	4.38901	4.27522
3.5	4.39709	6.5395	4.43437	2.10865	6.91005	7.19143	9.86043	4.00554	6.39876	2.71354	7.43789	4.7423			7.61143	3.57339	3.83906	10.6068	2.23858	2.30968	5.7699	8.09299	5.15496	4.7555	4.01082	6.29983	5.4163	3.49546	7.62718	3.33048	2.51995	3.6733	3.35516
4	4.3015	6.87465	4.12409	2.4219	6.58681	7.60289	10.0732	5.10912	5.95369	3.36178	7.50858	5.99678			7.47595	3.32561	4.04543	10.3453	2.37059	1.63425	6.2026	7.08288	5.0876	4.58634	3.66533	4.54631	4.62317	3.03506	7.35632	2.52666	3.08136	3.25069	2.74989
4.5	3.11107	5.54087	4.07606	2.85084	6.5722	7.73379	9.75898	6.04492	5.76539	4.29785	7.39441	6.64989			6.57516	2.89841	3.90749	9.58813	2.12721	1.59875	7.06331	6.85297	4.94609	4.85664	3.14125	6.48209	4.19559	2.6341	7.08498	2.37465	3.44365	3.02519	2.87226
5	3.94237	6.1857	15.733464062899*	4.03872	6.73491	7.60864	9.45759	5.44574	4.70248	4.8396	6.70771	6.4214			6.16023	2.74045	2.77113	8.04959	2.27047	1.56063	8.33218	7.00339	1.78063	4.91869	2.54239	2.94511	4.7698	2.08696	6.21285	2.3515	2.74893	2.53039	2.28575
5.5	3.66476	7.48534	3.04621	4.99943	6.01874	8.11115	10.582	5.48248	4.85508	5.93139	6.4426	8.03009			6.06839	2.6443	2.41674	8.03518	2.18052	1.45965	6.7238	6.42224	5.62023	4.92703	2.02605	2.76863	4.02128	1.83182	5.86713	2.45392	4.01848	2.53699	1.66407
6	4.14478	7.13002	3.23928	5.28749	6.02952	7.3634	9.40089	5.62529	4.55358	7.61616	6.85594	12.1179447432661*			5.66966	2.59746	2.12751	7.04455	2.39293	1.52403	8.14454	6.43536	1.76737	3.43793	2.05364	2.25926	4.22179	1.99186	5.36398	2.17162	1.80845	2.55413	2.09849
6.5	5.28641	7.6397	3.69261	4.88553	4.9598	6.65937	9.65984	5.1549	4.57536	9.09333	5.34665	12.0735991467457*			5.33398	2.55193	1.98283	6.84008	2.03548	1.64364	8.03034	4.50091	1.46153	3.00958	2.64425	3.13468	3.62611	1.95343	5.40128	2.35663	1.88641	2.14378	1.37872
7	4.2934	6.91723	3.39987	5.59409	4.82418	7.77934	9.39725	5.59136	4.57471	8.82556	6.06128	11.1775572718801*			5.16751	2.57934	1.97902	5.7025	1.69132	1.86554	7.55412	3.98691	1.59565	3.23607	2.99707	3.45425	3.17578	1.53105	5.26482	2.29845	2.92374	1.74985	1.87886
7.5	4.54693	6.72142	2.76502	5.5276	5.21715	7.54324	10.4917	6.01929	4.20091	9.08123	5.89974	11.6549074826133*			4.39073	2.60919	2.01412	5.695	1.65097	2.04468	7.40084	4.18379	1.49581	3.30412	2.60886	6.24858	5.5377	1.81484	5.37205	2.07803	3.285	2.32329	2.49546
8	4.69615	7.35335	3.71503	6.27481	5.32572	6.04667	9.68602	6.30098	3.83504	9.11634	5.94137	11.8090753617857*			4.1118	2.56059	2.01042	4.92143	1.97222	1.81074	6.73377	3.91374	1.29891	2.71223	1.77893	4.44472	5.87032	1.65862	4.92902	1.62134	2.54617	3.0507	2.36152
8.5	4.89603	7.20806	3.40379	4.55812	5.77835	5.79121	8.86939	7.05318	4.29408	7.93594	4.71464	12.0596221800101*			3.85943	2.34018	1.67263	6.43391	2.01305	1.82063	6.6559	3.42891	1.2254	2.49058	2.3756	3.82761	5.82604	1.67298	5.0232	1.74033	4.47723	2.62137	1.65831
9	4.57326	7.42848	2.89804	4.60874	5.64121	5.13853	10.6925	7.53944	3.87156	7.10204	5.12269	9.93941			3.53785	2.14152	2.22922	5.88535	1.9817	1.56151	7.39761	2.71179	5.14291	2.50308	2.10113	4.2355	5.4626	1.40173	4.60257	1.44851	4.67927	2.11422	1.37329
9.5	5.5492	7.59559	2.92238	4.72793	6.06517	4.78801	10.4615	7.28731	4.02469	7.82337	4.60724	7.40782			3.86055	2.13332	1.72188	6.57567	1.60862	1.24166	8.1082	3.0125	1.65292	2.8076	2.03466	3.33033	5.27689	1.30722	5.09083	1.56106	3.73406	2.53962	1.19184
10	5.6191	6.74492	2.75915	4.77808	6.05182	5.07968	9.86177	7.4073	4.34031	6.93598	5.02128	14.445750070436*			4.13309	2.02606	10.9927917*	5.68077	1.76574	2.45966	8.88442	3.20788	1.76732	2.47021	1.81544	4.80268	4.73963	1.47435	5.0904	2.05934	5.89935	2.41716	1.32157
10.5	6.60759	6.48505	2.32462	4.52593	6.18722	5.81969	8.35315	6.51095	4.18317	7.34876	5.99569	14.5539790766802*			3.8535	1.91694	1.11323	5.47468	1.64601	2.88519	7.59351	3.09601	1.3577	2.12756	2.15102	5.84735	4.50559	1.82944	5.06888	4.02217	4.93799	3.63114	1.08609
11	6.03043	6.89548	2.98985	4.23441	6.14066	6.23386	8.96995	7.37923	4.42397	8.27431	5.68315	14.4426616443455*			4.00308	2.08668	0.967772	5.51831	1.71265	2.54796	5.70721	2.61291	1.73214	2.53732	2.17648	6.5218	1.48435	1.53039	5.01947	3.1689	4.33614	3.35037	1.23412
11.5	6.74789	6.49933	2.99231	4.32053	6.41099	5.0608	10.1961	6.98449	4.01737	7.08211	6.24657	14.5008689550862*			4.25575	2.00493	1.14286	6.59559	1.09443	2.94356	4.11676	2.61265	1.8949	2.14069	2.1954	6.56072	2.15784	1.38672	4.97685	2.12618	1.35868	3.06737	1.21956
12	5.6372	6.46184	2.67084	5.17115	5.72951	7.93324	8.62757	7.57253	3.71837	7.04385	6.20971	13.1416679590791*			4.28423	1.92996	1.02102	7.4965	1.01539	2.52608	3.40457	2.89818	1.49409	2.49176	2.83159	6.42481	4.70729	1.52455	4.7385	2.353	1.4414	3.2614	1.16757
12.5	5.90957	6.80837	3.21577	3.89885	5.96234	4.5975	9.77795	7.79	3.95363	4.06472	6.28635	13.5429586384747*			4.27829	1.76804	0.807782	8.86197	1.36496	2.45091	4.34055	2.95139	1.56406	2.41999	2.0652	4.09732	2.16349	1.36555	4.41737	2.36499	1.29061	3.28243	1.22929
13	5.65259	6.60816	3.15285	4.16846	6.12037	3.75662	9.41965	7.05711	3.93692	5.51771	4.22466	13.5765075129724*			4.51103	1.96514	0.946035	9.01588	1.2441	2.13109	4.19107	2.76337	1.66194	1.98278	1.847	4.3026	2.28852	1.21214	4.34548	1.38178	1.29918	3.46543	1.28945
13.5	6.33004	6.35468	2.6294	4.36474	5.75607	7.44428	8.33956	7.89243	3.53209	6.25951	5.13076	14.0378108782575*			4.4573	1.59874	0.984035	9.49585	1.6898	2.19136	3.85955	2.31385	5.68519	2.20765	2.59468	2.78722	2.67492	1.15224	4.39615	1.21944	5.68529	3.55824	1.37937
14	6.6489	6.35275	3.20639	5.23494	6.46796	3.885	8.0055	8.44245	4.13951	4.21645	4.4282	10.748726445171*			4.58046	1.71707	1.03277	8.71908	1.6999	1.93116	3.95795	2.01802	1.08707	1.96021	2.17819	3.33919	4.9292	1.38949	4.06682	1.2264	5.34237	5.52771	1.35113
14.5	7.00593	6.66705	3.06956	5.12237	6.90848	4.63596	8.29215	8.17176	4.08799	3.01411	4.2692	5.92755			4.09558	1.47867	0.971339	8.52428	1.61701	1.96187	4.44027	2.00821	1.07592	1.93484	1.71219	3.61635	2.14323	1.17336	4.37517	1.12224	5.9831	4.79573	1.3041
15	6.83648	6.64203	3.08006	4.63676	6.53904	3.22535	8.4747	7.81574	3.76471	3.10226	3.13971	6.29797			4.81681	1.55214	0.681703	8.83152	1.51866	2.03124	5.66167	2.1895	1.12794	1.75787	1.89474	2.99713	2.3827	1.14437	3.89711	1.23151	6.31229	4.82595	1.24539
15.5	6.79056	6.29349	3.44078	4.23044	6.71772	2.98924	8.40361	8.30625	4.413	3.0716	3.47921	6.87658			4.40706	1.385	0.757792	8.69739	1.76848	1.97737	4.63579	1.93402	1.34779	2.08507	1.45813	2.73144	2.17643	1.26992	15.9371116*	1.35435	5.25537	3.3979	1.25486
16	6.56158	6.39402	4.667	3.47822	6.91887	2.42072	8.81242	8.8403	4.14297	3.20408	3.45545	6.97297			4.57108	1.39552	0.922645	8.41588	1.44468	1.94688	5.80004	1.96265	4.84712	1.66188	1.4239	3.37262	2.14884	1.17135	3.959	1.62847	4.52875	3.4341	1.65175
16.5	6.56004	6.26547	4.63949	3.12508	7.09494	2.161	8.18583	8.13064	3.95577	3.00494	3.63667	6.10024			4.38781	1.36452	0.993259	8.07611	1.57181	1.85687	5.36955	2.04649	4.91072	1.89173	2.30928	6.21161	2.35329	1.28514	4.13697	1.59353	4.50897	3.71036	1.46901
17	6.45269	6.17061	4.5211	2.47538	7.18904	2.35464	8.72516	7.27505	4.44941	3.01486	3.57747	6.08034			4.61786	1.62048	0.702972	7.9625	1.39667	1.97095	4.72766	2.02793	4.99657	1.77348	2.20161	4.50864	2.34563	1.55114	3.62664	1.8547	2.47358	5.5729	1.75512
17.5	5.97071	6.36314	25.5685426263566*	3.04918	7.29255	2.42312	9.54727	7.01263	5.33914	3.54742	4.25494	6.50996			4.48829	1.84379	0.903731	7.82486	2.32428	2.10735	5.52101	1.66393	5.2242	1.79761	2.32403	3.29373	2.18668	1.58853	3.68198	1.43006	4.63982	4.94132	1.68638
18	5.97444	6.99785	4.18251	2.41409	7.06912	2.41	8.66451	6.69923	5.29067	3.47681	4.49674	6.6813			5.07011	1.74469	0.782045	7.69467	1.94616	2.07413	6.38132	1.65466	5.38018	2.01169	2.01657	3.06966	2.19887	1.59662	3.62055	1.80412	6.69328	4.30753	1.53611
18.5	6.31096	6.76573	4.00541	18.2888977527618*	7.06432	2.37588	8.30948	7.42243	5.10515	4.43511	4.25262	6.93445			4.9714	2.00711	0.973757	8.38224	2.54803	2.21384	5.23999	1.77154	5.08423	1.69074	1.60211	2.77544	1.84772	1.64435	3.3484	1.76954	4.98113	4.22224	1.46977
19	6.55757	5.89801	3.53374	2.40453	7.96198	2.17776	8.16517	7.53006	4.30459	4.38571	3.48121	7.26232			4.92622	1.72308	0.909759	9.24479	2.59105	2.33711	5.27051	1.76997	1.21875	1.89333	1.38485	3.17365	1.74908	1.39706	3.87394	1.30055	4.55685	3.87637	1.45039
19.5	5.96861	6.19139	3.75335	19.1943842502697*	7.62214	2.59994	10.2364716438847*	7.68613	4.19906	3.23155	4.52819	7.76221			4.22665	1.91353	0.993738	9.76723	2.15425	2.33284	5.42543	1.90126	5.72055	1.87232	1.65354	2.97957	2.0725	1.52963	3.99428	1.09752	4.89125	5.33987	1.38622
20	6.49847	6.42442	4.21958	3.19471	7.3682	2.16011	9.47824	7.61883	4.317	2.98778	4.73611	7.29296			4.84781	1.68676	0.945141	10.2321	3.08169	2.01685	4.07562	1.74356	1.39142	1.88535	2.11582	3.46007	2.24024	1.27323	3.4671	0.809424	5.59752	4.47807	1.33568
20.5	7.49791	6.28679	4.23384	3.72302	7.83044	2.40357	9.78115	6.83217	4.56625	3.5881	4.19459	7.32398			4.70794	1.57248	1.10252	10.5995	2.36566	2.05253	4.83003	2.07446	3.60459	1.80622	1.25312	3.18296	2.34247	1.41358	3.89228	1.09037	4.12334	3.73008	1.38637
21	7.09733	6.42873	4.09104	3.78054	7.53334	2.77346	9.26233	6.04459	4.48763	4.68094	4.4078	7.49666			4.5062	1.76809	1.05706	9.95249	2.50172	2.04328	4.07578	2.20795	5.95025	1.96842	2.0203	2.94824	2.2217	1.53501	3.96842	1.06415	2.84417	2.93281	1.44366
21.5	6.91415	6.4754	3.48345	4.02806	7.65992	2.11645	10.0193	6.09973	4.17638	5.00955	4.64707	6.93047			4.3346	1.68882	1.20887	9.94674	2.52733	2.12043	7.20618	1.98314	3.46667	1.89548	1.43352	2.66064	3.24197	1.49748	3.86641	0.882939	1.41438	3.38165	1.61249
22	7.30285	5.8796	4.45898	3.29217	7.96469	1.95379	8.50536	6.34591	4.38398	6.003	4.22554	7.68371			4.79435	1.62321	1.02076	10.1915	14.0586178*	1.9749	5.27503	2.21695	5.97314	1.94061	1.39443	2.8033	5.15104	1.2367	3.30181	1.11969	1.18077	3.94607	1.49921
22.5	7.96476	5.70805	4.46923	3.33024	8.1572	1.87386	9.30759	6.9205	4.93488	5.39543	4.65919	7.02755			4.89915	1.96771	1.06583	10.8644	2.85236	1.73366	5.36098	2.25448	5.86658	1.84845	1.64415	2.5981	3.51092	1.3424	3.26777	1.02589	1.83931	4.10094	1.42321
23	7.80815	5.16696	4.55324	4.35754	8.19743	2.65571	9.55158	6.90489	4.94095	5.81196	4.76273	7.11499			4.81189	1.72283	1.13611	11.047	2.3871	2.01882	3.64243	2.16255	3.77813	1.99609	2.11061	2.82406	5.20527	1.93334	2.88251	1.14366	1.33204	3.75398	1.61014
23.5	7.16745	5.96793	3.76577	4.7692	7.32377	2.66488	9.5949	7.4897	5.73986	6.40413	4.27467	7.60752			4.38113	1.65478	1.15473	11.0184	2.34224	1.89167	4.04588	2.00392	5.51046	1.91764	2.02183	2.57327	5.11789	1.64423	3.09507	0.939319	1.69796	3.01935	1.36442
24	7.41868	5.86899	3.23444	4.5678	7.54784	2.09344	9.76165	7.97095	5.20551	4.24098	4.06335	7.14691			4.73818	1.76967	1.30563	10.5101	2.74553	1.5925	3.53768	2.37398	5.64157	1.94776	1.54075	3.16371	5.4841	1.55338	3.03956	0.966006	1.64515	2.8396	1.40451
24.5	7.43383	5.86039	4.25197	4.22965	7.21544	2.38573	9.7865	7.74995	5.53665	4.42802	4.18569	7.28874			4.39864	1.90265	1.02248	9.9976	1.96889	1.88188	3.31526	2.40005	5.60039	1.85862	1.51619	2.30873	5.5476	1.37949	2.93671	0.8306	2.28037	3.40022	1.28328
25	6.59121	6.38569	4.14913	4.0611	7.38509	2.50653	10.0166	8.45936	5.91344	4.77913	4.38046	6.95041			4.44665	2.02259	1.28464	9.50335	1.78206	1.84159	2.96457	2.27855	5.83081	1.80418	1.71303	2.37021	5.50067	1.64343	2.62767	0.915167	1.3561	4.02333	1.23074
25.5	6.19722	5.47531	4.14302	4.61553	7.85524	3.69899	9.01761	8.27287	6.02948	5.49146	3.8836	6.61444			4.18104	1.90373	1.14928	8.21884	1.74545	1.96166	3.24945	2.49435	5.23291	1.76952	2.59433	2.41976	5.27381	1.52208	2.36133	0.956289	1.35348	3.42333	1.48791
26	6.2168	5.90614	4.43793	3.23556	8.15233	3.23505	9.43122	8.46417	6.03798	6.37241	3.66506	6.5734			4.50814	1.59585	1.24476	7.36543	1.34575	1.81573	3.42698	2.54752	6.95989	1.86454	1.13865	2.43984	5.39802	1.15763	1.96411	1.02128	1.19969	3.111	1.54017
26.5	6.47445	5.82125	3.88168	3.45812	7.6905	2.79783	8.93258	8.34576	6.71077	5.12949	3.33542	6.44198			4.58082	1.74467	0.996043	7.71648	1.64575	2.16807	3.43241	2.62103	6.20552	1.84205	1.40936	2.01046	5.2816	1.11892	2.20114	1.24907	1.20188	4.27511	1.39434
27	5.69027	5.64108	3.85661	3.26872	7.51146	2.55287	9.31462	8.23482	6.59446	4.61285	3.60414	6.31645			3.73196	1.81135	0.934191	7.89886	1.74028	2.6303	3.21558	3.04655	7.3544	1.55509	1.58168	2.1647	5.36053	1.28107	2.20551	1.10546	1.09911	4.92268	1.27307
27.5	5.889	5.7249	4.03326	3.31827	7.65532	3.36949	9.87346	8.1607	6.03335	6.05069	3.53888	6.10367			4.55316	1.88519	1.06345	6.9685	1.92667	2.05564	5.54107	2.64152	7.62839	1.32369	1.25696	2.59901	5.17928	1.06977	2.23241	1.08463	1.5021	3.65785	1.4937
28	6.23937	5.4142	3.6997	4.26306	8.10823	3.47148	9.95926	7.1982	6.87504	5.53624	3.29614	6.67144			3.98654	2.55146	0.968158	7.19713	1.25925	2.42352	5.11196	3.07049	7.6669	1.5208	1.09049	3.51416	4.99583	1.08789	1.69656	0.920563	1.31914	3.43247	1.40661
28.5	6.27582	5.97466	3.73467	4.77395	7.29598	3.26446	9.34746	6.96461	6.95102	5.46649	3.67374	6.68307			3.90188	2.3011	1.21061	6.9456	2.21829	2.37562	4.90811	2.96258	6.94901	1.61987	1.67444	5.21528	5.34998	1.08137	1.70263	1.03973	1.28331	3.64209	1.25282
29	5.73857	6.23825	25.4419888993493*	5.11197	7.65893	3.24856	8.86117	6.1704	6.58708	5.16898	3.61983	6.51442			3.72761	2.42138	1.19631	7.03948	2.21304	2.25025	5.33093	2.642	5.92447	1.56538	1.27692	6.9344	5.15429	1.12071	1.56961	1.00231	1.33985	3.70104	1.66471
29.5	5.2008	5.69591	17.5565596942244*	6.56223	7.04653	3.54634	10.1754	6.20049	6.65119	5.491	3.02188	6.66408			3.36651	2.52856	1.02891	6.68409	1.93182	2.29572	4.92087	2.729	5.80684	1.8244	1.40749	6.72093	5.2099	1.15659	1.62713	1.04947	1.47601	5.2833	1.38137
30	5.76747	5.62573	18.0595273574193*	6.79939	7.175	5.21828	10.499	7.02736	7.05236	4.89181	3.12119	7.14779			3.68496	2.43352	1.10081	6.2452	2.29697	1.99306	4.14283	2.59197	7.07555	1.92765	1.74258	6.81304	5.09409	1.03951	1.3584	0.897126	1.87771	3.70627	1.4371
Average 25-30 min	6.02554	5.80937	3.992	4.49708	7.59406	3.35544	9.5844	7.59079	6.4942	5.36278	3.55821	6.60738			4.06084	2.10904	1.10701	7.43481	1.82776	2.16465	4.20407	2.69323	6.60315	1.69247	1.53508	3.92743	5.25436	1.20718	1.95877	1.02192	1.3644	3.92532	1.41478
