# Supplementary material for: Microtubules restrict F-actin polymerization to the immune synapse via GEF-H1 to maintain polarity in lymphocytes
Source: eLife journal article supplement (doi:10.7554/elife.78330), 2022-09-16
Supplement: supp [file Figure2E.xlsx]

## Sheet: Temporal data
Lysosomes-droplet distance (µm)
Time (min)	BSA																					aIgG
0	8.95751	5.20479	6.53591	6.83361	8.7191	4.5651	6.21067	2.90988	3.68305	5.89206	5.96916	4.13317	8.2285	9.67863	6.53402	8.06249	5.20297	4.5059	3.83732			4.76848	4.37974	3.7368	6.67131	4.67579	4.87571	4.13732	3.58082	10.6619	3.29841	3.88953	6.54489	8.42653	6.69488	10.2165	5.62631	5.70103	3.85114	7.23146	5.0402	4.71304	2.82663	4.67717	2.24441	4.51403	4.66867	6.28156	7.957
0.5	8.78338	3.06661	4.04883	7.22967	10.0671	5.66239	6.00579	2.75662	3.22593	4.77841	6.76348	4.43549	7.72596	9.53108	7.72875	8.41099	2.89149	4.33808	4.72095			4.10009	4.64531	3.10425	6.2007	3.36352	5.03147	5.19907	3.17065	4.04733	3.01238	4.85095	7.47391	8.48139	7.14892	8.53872	7.07552	5.87639	4.55006	6.27603	5.92533	4.56179	3.31669	5.33531	3.50408	4.61906	5.52787	6.92803	7.94659
1	7.3643	3.2502	3.71355	6.63389	8.81231	5.76388	11.6254	2.39451	3.12776	4.74992	7.6855	7.20527	7.54732	9.02159	7.31384	9.65663	4.1543	4.33042	5.6596			3.70681	3.7788	4.02176	6.44325	2.58301	5.44119	5.35996	4.18234	3.94342	2.81432	4.60677	7.43106	7.42257	6.45024	10.522	6.08737	5.63836	4.09857	6.26889	5.49778	4.12077	2.94787	5.51479	4.22066	5.36763	5.69278	8.73287	9.38162
1.5	7.02497	2.79274	5.27578	6.79541	7.52307	4.87577	6.11754	2.08304	3.31598	4.94501	8.7991	5.61964	7.6628	9.50112	6.84044	10.4101	2.93751	5.76406	6.20435			4.42777	3.84911	4.7437	6.64247	2.03523	5.98972	5.24826	3.87229	3.7817	2.63851	4.42756	7.51647	6.47671	5.14641	7.82679	6.14401	5.018	4.0895	4.02199	5.27168	4.53515	3.33961	4.49542	4.59642	5.1756	5.40136	8.05781	8.38422
2	6.06188	3.14977	5.34087	6.76821	8.35031	3.96892	6.8122	1.99541	3.47033	4.89042	7.09212	6.03983	7.46167	8.79658	6.9424	10.7475	3.77177	6.07676	6.84179			5.21007	3.50909	3.93623	6.78518	1.53185	4.86945	7.16358	3.43485	3.73679	2.87588	4.8463	7.65353	5.37927	4.65021	9.90973	6.17456	3.50468	4.11591	3.21439	4.54141	4.80099	2.93319	5.72818	4.22232	4.75482	4.83096	7.50542	8.37982
2.5	3.51165	3.29479	5.34315	7.8559	10.058	4.29345	6.56173	4.53078	3.45296	4.58845	7.69569	6.48676	7.4177	9.37973	6.86174	9.901	3.81759	6.27073	6.38028			5.68523	1.9502	3.39738	6.5218	1.79898	4.89039	6.17184	3.29168	3.5397	2.49664	5.49881	7.51995	4.13984	4.84876	8.17791	5.93216	3.00067	3.98955	5.38706	3.99629	4.43101	2.82305	5.00747	3.72465	4.31936	4.64923	6.5431	8.04157
3	3.77188	4.11029	5.82138	8.90401	8.13213	3.32073	6.27287	3.87246	3.24913	5.43766	6.09496	6.43598	7.15482	9.19542	6.08348	10.4885	4.89885	6.2624	5.81552			5.12956	3.26914	2.7048	7.03614	1.83491	4.91784	7.48613	2.74972	3.70651	0.976897	5.22027	6.71701	3.6738	9.66374	7.40184	5.08437	2.52259	3.06278	3.25594	2.65534	4.99378	2.64158	3.93431	4.01766	4.0407	5.32979	6.32294	7.36672
3.5	2.87889	5.88975	5.02226	7.64248	9.28117	2.88161	5.15628	3.16718	4.45114	5.04306	5.98065	6.88923	7.41846	9.13515	5.70253	10.3858	4.41092	5.45327	6.88997			5.74823	3.33378	2.72399	6.6218	1.89348	4.62941	5.12694	2.7048	3.5186	0.78972	4.91944	6.46835	3.47969	3.44991	7.48234	5.46842	2.3367	3.47959	2.72436	2.66713	4.13092	3.15852	3.70744	3.51928	3.8983	5.47071	3.83394	7.62867
4	2.85476	6.53959	4.89236	5.71809	9.26923	3.52852	5.43098	3.14195	3.59304	5.92936	5.28429	6.56223	7.81354	8.97333	4.88125	10.0493	3.8428	5.27281	7.54907			5.49965	2.89061	2.62611	6.16834	1.71574	4.32806	5.58644	2.69542	3.53884	1.8315	4.94925	5.93611	6.80048	2.26926	6.0517	4.96588	3.15177	3.70171	3.6709	2.38086	4.31992	2.09966	2.93671	5.28175	3.25353	5.72025	5.42805	7.33051
4.5	3.23284	7.69148	4.77077	5.67729	7.78962	4.10588	5.47597	2.90933	3.83577	6.33258	6.20631	3.69186	8.39496	8.92724	6.94213	10.7986	5.39873	4.91391	7.97112			5.1929	2.34688	2.5896	6.46646	1.67233	4.51048	4.54794	3.04588	2.98367	1.12877	6.3378	6.49024	2.85588	2.5385	6.10795	4.21996	2.45675	2.58215	4.01063	2.66313	4.02052	2.03817	3.26134	4.57011	3.81802	5.55733	5.99541	6.84155
5	3.58674	8.64626	4.32221	6.24045	6.62923	3.4299	4.3689	2.84135	4.29269	6.21559	6.28674	4.84963	8.90687	8.47638	5.7773	11.3767	6.48643	5.43271	7.47909			5.98248	2.39657	2.19038	6.73543	1.44028	4.20548	3.67782	2.77181	3.1573	0.937802	6.02462	4.58758	2.94837	2.13837	7.23129	3.97833	4.12302	2.04302	3.04113	1.82277	4.03382	2.53774	2.84155	4.93919	3.85263	5.51438	5.53078	9.06078
5.5	3.83568	9.88055	4.97338	5.51873	6.49235	3.15114	3.89427	3.91779	3.73406	6.37673	8.76967	5.57811	9.37006	8.57912	6.05505	10.7317	5.10745	5.74689	8.4385			5.42841	1.30657	2.2689	6.4987	1.63386	2.93849	3.63945	2.44353	3.09033	1.04236	3.81138	4.39886	3.58366	2.89764	7.88757	3.56126	3.65987	2.22871	1.7703	2.26011	3.64896	1.72372	2.62472	5.06605	3.53824	5.33892	6.36312	7.70611
6	4.54299	9.34235	5.408	5.28273	6.65671	3.62357	4.63105	4.04378	4.00986	6.71391	6.7789	4.96468	10.4004	8.45732	5.21351	10.77	6.36403	5.53271	8.39884			5.49921	0.682545	2.11086	7.26894	2.08811	2.15676	2.948	1.96847	2.90607	1.07076	4.59668	3.60377	3.66196	3.57901	7.29403	3.1203	4.37384	1.78194	2.19526	1.61095	2.48924	1.78969	1.07766	4.60063	2.90578	5.94682	11.6220366*	8.76279
6.5	3.77644	9.42918	4.68232	5.86325	5.87935	3.89185	4.72701	4.59457	3.97808	9.40119	5.80221	3.15015	8.79746	8.13784	5.09137	11.615	6.98393	6.13176	8.52972			5.29742	1.23376	1.84506	6.56343	2.05671	2.33832	2.97703	1.97164	3.01741	0.720228	6.12954	2.31811	1.02312e+005*	1.94383	7.18708	2.65519	3.97833	1.64157	1.58682	1.89473	2.43979	2.26011	1.91132	5.93277	2.90759	6.08016	10.3658362*	8.38006
7	4.33716	9.31826	4.23399	5.84949	6.35426	4.21426	5.32944	3.73626	4.02533	7.67439	4.48394	4.49987	9.63126	8.1519	4.80179	10.2277	9.2369	5.18748	8.5882			6.85496	0.814407	2.29943	7.22123	1.9142	3.1581	3.34818	2.9329	3.08876	0.228117	6.57887	9.93157073*	2.99524	10.342422*	1.27092e+005*	2.71467	3.95804	2.12445	1.55586	1.36561	2.03792	2.50239	2.70687	5.05805	3.03159	5.9179	6.31223	9.35351
7.5	4.41527	8.72285	4.25744	5.93636	5.82922	4.58416	4.39236	5.13431	4.67549	5.49134	4.97931	3.13233	9.56178	8.15948	4.63442	10.6046	8.8861	4.83701	8.29973			5.40158	0.505857	2.36141	7.62805	1.85438	3.10149	2.13348	2.64908	3.07704	0.0201031	6.67812	2.53932	3.21152	2.74249	6.32436	2.54144	3.61851	1.73763	4.54856	1.07936	1.69027	2.43526	1.99853	3.3415	3.23263	5.49674	6.50781	8.95716
8	4.41038	8.44388	4.85347	5.33139	5.99366	4.31091	5.34245	4.64675	4.54838	5.18398	6.23893	3.74329	10.3708	8.5319	4.36641	10.5563	8.6643	5.75563	8.39873			4.52792	1.43026	1.94944	7.83183	2.33914	2.47845	3.28403	2.53766	2.40033	0.170515	7.05604	2.0292	2.69986	2.32654	6.09144	3.17447	3.45075	2.34615	7.02176	2.0056	2.11703	2.21111	1.85605	3.89969	3.64452	5.88206	7.15146	10.5685
8.5	4.35997	10.3022	5.35701	6.60848	6.6817	4.81711	5.24294	4.5535	4.98735	5.55975	5.99028	4.33949	9.878	8.82344	4.31872	10.3168	7.97699	4.87443	8.4617			5.09938	2.11024	2.02606	8.40312	2.03289	3.84888	3.60726	3.28707	3.04141	0.417683	7.35487	1.89925	2.86883	3.23143	2.14401	3.55002	3.73168	1.24728	7.54964	1.4129	2.12374	2.17158	1.98539	3.78159	3.20812	5.84661	6.6398	10.5772
9	3.87298	11.1284	4.83308	6.60898	5.5014	3.88059	5.26021	4.6888	5.13018	5.42469	2.57122	4.07981	11.2132	8.73448	5.64006	10.1983	8.29976	4.64732	8.44341			4.95007	1.69341	1.63058	8.65793	2.1914	3.59348	4.01295	4.03325	3.22305	1.66584	8.33763	1.56065	2.31742	3.83476	6.53557	3.2767	4.11318	1.04255	1.18364	1.47247	1.57327	2.28605	1.83193	3.67281	2.83341	6.40408	7.81949	10.1688
9.5	3.58015	9.74007	5.14768	4.51445	6.53256	4.71622	6.09231	3.24877	5.12808	5.9051	5.85479	5.03557	11.1301	9.32444	4.48898	11.3988	7.20917	4.54953	8.47789			4.64197	1.46795	1.74833	8.58843	1.88039	3.64436	3.41141	4.28656	3.43385	1.33183	7.7236	0.85	2.0983	2.90883	5.78704	3.03686	4.05679	0.948524	7.02102	0.944368	2.02048	2.15564	1.73692	4.87425	2.70138	6.3733	8.03018	10.9611
10	4.1337	8.11086	4.73243	4.77066	5.78903	5.33503	6.14933	4.10224	4.9801	4.54384	2.98269	5.423	10.2383	8.00969	5.33516	10.7642	7.41829	5.0749	8.15302			3.36881	1.3591	2.32649	8.71448	1.13018	3.46488	3.53856	3.78261	2.83522	1.46419	7.98249	0.902164	2.15383	2.86232	6.24586	3.24874	3.75386	1.61007	6.93084	3.50227	2.16261	1.95177	2.0053	5.24396	2.81366	6.18727	8.35651	10.6046
10.5	3.43722	7.90758	4.65532	5.53502	6.39288	4.42433	4.87652	2.22082	6.10842	4.04321	3.39344	6.11201	9.64096	7.78097	4.89381	9.50708	8.14769	4.59865	7.93553			3.93999	1.45071	2.93017	7.93319	1.61707	3.47943	3.87067	3.67925	1.8817	1.87642	8.63148	0.970195	2.16371	3.36659	5.52738	3.74577	4.12693	1.81338	7.56449	3.53736	1.85177	1.99207	1.85055	6.57988	3.06876	5.49793	7.72427	10.7939
11	4.02937	7.88743	5.57323	6.28848	6.01242	3.8295	5.51771	2.90865	6.45804	4.32959	3.27659	5.5026	10.4917	8.06183	3.96276	8.18035	6.58775	4.97857	7.79862			4.70168	1.27243	2.30786	8.47702	1.57113	4.01535	3.85211	3.96137	1.34995	0.863661	8.17966	2.71205	1.59813	3.71111	7.05288	3.0888	3.77242	1.97057	6.76315	1.0753	2.62691	1.73498	2.20697	6.91759	4.30019	5.56898	7.42602	12.2972
11.5	4.21106	8.39959	5.49142	5.55373	5.83826	6.48127	5.89985	2.35756	6.48527	4.32198	3.41462	5.44738	9.92068	7.71058	4.12453	7.77006	5.19518	4.60804	7.56198			4.41794	2.04767	2.18891	7.67108	1.3418	2.83029	4.22589	3.88262	1.34683	1.78629	7.77651	2.77548	1.78797	4.16251	9.00332	2.1766	3.42038	1.54151	7.01669	0.835637	1.55114	1.81851	1.95727	7.37219	3.86792	4.48736	7.54275	11.2934
12	4.64794	8.36686	6.11218	4.88617	5.48449	4.24742	5.54599	2.55194	6.60485	4.19085	3.7087	5.76023	9.05833	8.06788	4.17164	8.0648	6.79303	5.25359	7.48783			5.2762	1.8364	2.49773	7.43748	1.41929	3.9406	3.79422	3.83317	1.64966	2.27026	8.41852	2.28089	1.90553	4.36314	9.27799	2.53719	3.1223	1.36853	7.49169	3.15635	1.70159	1.26228	2.12441	6.98633	3.69622	4.99967	6.93591	10.9119
12.5	5.24266	8.10913	7.3427	5.85202	6.42719	3.97803	5.16074	2.63119	6.00879	5.46985	4.31851	5.80151	8.83546	8.02839	4.62937	6.58629	7.09924	4.89285	7.44823			5.02054	2.35958	2.51131	7.95338	1.46155	3.48677	4.59476	4.00987	1.55208	3.45929	7.43054	1.5651	2.41356	4.39158	11.061	3.27716	3.64107	1.44234	7.03323	2.33408	1.84922	1.67149	2.16186	6.78004	3.84716	5.2529	8.03644	11.8775
13	5.24142	8.29787	8.70423	5.87635	6.1981	4.17555	6.20196	1.56678	6.75752	4.52752	4.33488	4.69902	7.94508	7.71335	5.30453	7.74167	6.80985	5.1799	8.17916			4.98943	2.45051	2.44376	8.23457	1.61254	2.23042	5.09314	3.37784	2.21611	3.99809	6.13171	2.52907	2.57558	4.40007	11.2228	3.21071	3.74226	2.57223	7.21265	1.26249	1.77361	1.66956	1.89567	6.6272	4.32296	5.05155	7.97174	11.8415
13.5	5.61715	8.03457	8.33985	5.32911	6.99293	4.45311	6.35325	2.77598	6.60887	4.11842	4.45874	4.14395	7.05355	7.06616	5.88092	7.72714	7.3409	4.90395	6.6836			5.27041	2.62043	2.23355	8.54495	2.19054	3.5353	5.21396	3.88598	2.57015	3.59902	7.98411	3.52455	2.58099	3.93961	10.9667	3.07027	7.224	1.23768	7.24203	3.09391	1.63943	2.44581	2.28942	6.69146	4.73196	4.11203	7.56283	11.895
14	5.39665	8.16808	7.68048	5.2083	6.71403	6.41518	5.99765	2.65289	6.30608	3.95	4.86774	4.88283	7.61494	6.55434	5.86548	7.16226	6.76796	4.79959	7.17659			5.19102	2.98771	1.99823	9.7749	1.81358	2.89492	5.05409	3.6864	3.14319	3.5987	6.58369	3.86637	2.12471	3.86737	10.983	3.17978	7.4247	4.25401	6.96811	2.67095	1.33751	2.17454	2.42221	7.01358	4.65724	4.6203	8.05117	12.3957
14.5	6.22351	7.24841	6.95355	6.18769	6.33463	5.64043	6.52698	2.2154	6.95119	4.02241	3.86108	4.87216	6.89253	6.36205	5.02834	6.46113	6.61876	4.31764	8.52256			6.86289	3.29044	2.00766	10.167	1.44554	2.56438	5.08482	3.85733	1.9087	4.06654	6.2836	2.79584	2.42029	3.44036	10.6982	3.68664	2.94751	6.43918	7.2673	7.42936	1.20943	1.7757	2.5785	7.3532	4.47138	4.56176	7.76119	12.7249
15	4.9076	7.06982	7.60858	7.04193	6.42982	5.60396	6.54105	2.18307	6.1323	4.78645	4.13466	5.43535	6.74885	6.46187	4.78748	5.11646	7.04157	5.2094	8.65398			6.24082	3.69383	2.71563	10.3219	1.86174	2.50988	5.29531	4.19872	1.79897	3.33649	7.45152	1.4472	1.71534	3.67388	9.72286	2.74024	6.78968	6.38309	7.31782	6.74156	1.3983	2.0929	2.43167	6.74586	4.58337	4.49334	8.74466	12.0573
15.5	5.31153	7.35626	6.6819	5.52054	6.27287	5.36947	6.69485	2.02906	5.83605	5.34273	4.28704	5.17831	5.95522	6.69098	4.8571	5.89959	7.00876	5.30237	7.93494			5.6283	3.87536	3.7863	10.9644	1.6082	2.31319	5.90659	4.48565	2.32421	3.19279	6.33162	1.30265	1.73187	4.26911	10.1898	2.734	3.17819	6.44493	7.27854	4.04655	1.16263	1.65873	2.2516	7.40319	4.73706	4.75576	7.8922	13.3484
16	5.35742	7.20978	6.29792	5.19205	5.73239	6.78018	6.27625	1.87037	5.63987	4.58897	4.4552	5.6256	7.34722	6.37923	4.95834	5.99658	6.99691	5.10154	8.30836			5.09088	3.63789	3.73723	11.4577	1.4309	2.22913	4.71691	4.737	2.42476	3.84924	6.2298	2.63075	1.38199	3.82936	9.59423	2.82112	4.11154	6.50342	7.03532	3.73398	1.35393	2.25858	2.06641	7.73421	4.89678	4.9526	8.44356	12.2193
16.5	5.44237	8.9183	6.79068	5.05758	5.48516	6.79105	5.06056	2.29054	5.81534	4.14864	3.78153	5.00324	5.81221	6.31705	4.86185	4.67327	7.1118	5.17361	7.95116			7.74921	3.72416	3.52102	11.1245	1.75858	2.3076	4.63664	5.33502	3.23834	4.14712	6.56379	2.60025	1.36111	4.23028	9.69596	2.38853	6.80709	6.3039	7.38195	3.42537	1.69024	2.22822	2.16057	8.00224	4.89943	4.8769	7.28129	13.3334
17	5.77616	8.44959	5.96417	4.47563	5.53714	4.92992	4.55121	1.95062	5.55762	4.30251	4.40106	5.37932	5.36133	6.25787	4.90659	6.57184	7.06565	6.15602	8.86561			6.82907	3.2085	3.9953	10.8498	1.96049	2.47103	4.4669	5.10044	2.54466	3.68306	7.51534	2.51267	1.31971	4.12275	9.16644	3.42743	7.16267	2.46758	7.28843	7.57796	1.33768	1.83385	1.51563	8.38163	5.10278	5.11646	7.15398	12.2419
17.5	6.76293	8.89131	6.16173	5.41837	4.96115	6.11066	5.1006	1.27435	6.34082	3.72154	4.59082	5.06539	5.77577	6.27865	5.30383	5.98436	7.89462	5.64991	8.90253			6.61617	3.61843	4.24325	10.6482	2.0876	3.79549	4.99878	5.13004	2.06433	3.65559	7.61729	2.31797	1.37837	2.67689	8.66328	2.91697	7.47344	1.86435	6.92541	3.24801	1.08154	2.61304	1.58938	9.07451	4.98059	4.70766	7.42272	11.7326
18	7.14315	8.69285	8.06494	6.00216	5.37307	6.08175	4.7434	1.29302	6.28865	3.03761	3.69875	5.76507	5.61089	6.10315	5.22837	5.40427	8.63992	5.9533	8.80851			6.6976	3.7427	4.64887	10.7692	2.79406	2.83601	5.20655	5.06209	1.84719	3.24161	8.43929	2.28248	1.43351	2.96643	12.0508	10.9388	8.07119	2.57025	6.90589	6.95631	1.10085	2.28608	2.06646	9.12991	5.07965	4.39072	8.11623	12.0609
18.5	7.14324	8.04482	8.17744	5.7543	6.62439	4.19107	4.6603	2.8502	5.98059	3.97157	3.51735	5.45942	5.90147	6.12144	5.04957	5.95473	8.55662	5.44602	9.02723			6.53765	3.62416	8.79958017*	10.9604	1.72593	1.84706	4.81796	3.61089	2.23988	3.51434	8.01338	0.788395	6.42103	4.32133	8.35481	10.0755	8.08159	6.27944	6.85061	2.73889	1.50057	2.02687	2.85849	8.57433	5.0045	4.04514	8.61332	13.4031
19	8.16075	9.2593	7.35505	5.46661	6.06164	3.85105	4.41848	3.23798	6.28614	3.9812	2.96482	5.32605	5.9932	6.35353	4.31079	5.91923	8.59541	5.86373	9.75398			6.48946	3.31042	3.55155	10.0793	1.48943	1.65774	5.09882	3.30709	1.93175	3.62974	8.54537	6.26417	1.63207	3.31511	9.05461	3.4056	4.98683	6.30236	7.081	7.30028	1.40226	1.40986	1.7881	8.38271	5.26946	3.74354	8.48781	14.1162
19.5	8.04125	8.88203	6.43805	5.661	6.70826	4.50065	6.0135	3.11011	7.13605	4.47827	3.59407	6.19248	6.61243	6.25781	4.40069	4.89527	7.06711	5.71798	9.92306			7.09812	3.26466	2.38789	9.89457	1.91378	1.66683	4.68819	3.68287	2.26479	3.47152	9.34522	0.877263	1.66892	3.23225	7.68387	3.36767	7.54279	6.38829	6.9606	4.56342	1.22461	1.70909	1.95349	8.30789	6.01075	3.63118	8.46662	14.7198
20	6.36865	8.39729	6.65157	6.79862	6.7021	4.78002	5.008	3.08871	6.69996	5.22475	3.07282	5.68494	6.28857	6.38322	4.57263	3.14316	6.35734	4.80236	10.1176			6.0231	3.17162	2.51557	9.93663	2.51357	1.3026	5.33843	3.17717	2.42765	4.09744	9.00956	2.03741	1.4661	2.97327	7.19995	3.61199	4.63996	6.49906	7.05396	7.41118	1.19252	1.64366	2.36881	9.07794	5.61665	3.26144	7.78735	14.8091
20.5	8.17143	8.69316	7.85638	5.60089	6.23025	6.71437	5.04833	3.00991	6.24777	5.54892	4.16527	6.92457	6.55754	6.32613	4.04377	4.23823	7.3699	4.05267	9.99777			6.76135	2.90654	2.59551	9.21239	2.42267	1.11675	5.05044	3.10783	2.29732	4.65186	8.95192	1.83878	1.89117	4.31624	6.26943	3.97462	7.14777	2.12463	7.04524	4.30565	1.32381	1.55173	1.68974	8.46309	5.72857	4.11209	7.41226	14.6159
21	8.50746	8.51354	7.38545	5.49757	5.91806	4.48915	5.56468	2.7067	6.2963	6.06767	4.19943	7.91429	5.99809	6.60888	3.81959	3.99686	7.00257	4.86366	10.4929			8.00938	3.25728	2.84155	8.85947	1.96365	2.16754	5.71566	3.43786	1.51561	6.46464	8.13389	1.54703	1.57699	4.07282	5.15585	3.2146	3.28835	2.9579	7.1454	2.8325	1.6347	1.25116	1.70992	8.33406	5.45723	3.56273	7.65893	14.1181
21.5	6.79986	8.40686	8.46304	6.81749	6.65765	4.17242	6.8239	4.08546	5.86609	5.29483	3.83815	7.53972	5.87239	6.27717	3.46175	4.21761	6.92298	5.09518	10.0229			7.45237	5.02477	2.29365	8.97374	2.37858	1.83958	5.28181	2.77298	2.23585	6.18958	8.10236	1.45298	1.73736	2.85475	5.18085	3.21412	2.53177	6.46962	7.43724	2.85813	1.60415	0.983919	2.59696	9.30788	5.35502	3.8773	7.33791	14.5421
22	8.01112	8.64716	9.06441	5.92567	7.46852	4.72367	5.60048	5.68422	5.77215	5.63858	4.48934	7.20382	6.351	5.72007	3.58422	5.70842	5.42384	4.79199	9.9755			7.40751	3.74331	2.87064	8.61466	1.86354	2.46981	5.34117	3.0713	2.77929	6.18138	7.624	2.23343	1.57153	2.8757	5.53778	3.27622	2.47436	6.47911	13.7013	3.62351	1.78594	1.26473	2.73102	9.44731	6.69778	3.81451	7.34	14.9935
22.5	7.70627	8.37938	8.7879	6.55673	6.95985	5.14169	6.55229	6.49737	6.57443	5.60466	4.4289	7.07266	5.91742	5.80638	3.42263	5.09078	4.98887	5.19023	10.403			7.27284	3.48369	2.37031	7.88661	1.66389	2.73546	4.51117	3.10543	2.51246	5.40983	8.56481	1.56569	1.48139	2.97433	5.77023	3.31456	2.60235	2.29237	7.32374	3.77733	1.78633	1.16472	2.9878	7.8937	4.7452	3.44164	6.94408	14.6356
23	9.59855	9.18956	8.47632	6.39072	7.08017	4.84172	5.79822	4.91864	5.91752	5.49022	4.38627	6.6525	5.26879	5.93991	3.11772	3.60812	5.66815	5.46815	10.5324			7.74206	2.99198	2.25056	7.28111	2.45811	2.82745	5.09572	3.16028	2.23777	4.13023	8.75782	0.758558	1.81345	3.61019	3.91356	2.23782	2.26542	6.34091	7.1948	2.55543	1.335	1.34873	2.9309	9.23274	4.8195	4.53455	7.12966	15.1749
23.5	7.42322	8.62706	8.81677	6.52506	7.51978	5.52102	6.76064	4.13153	6.17963	5.22373	5.41386	7.07538	4.29456	5.91184	3.79866	4.74759	6.65169	5.37336	10.5239			6.92676	3.40153	2.24569	8.13468	2.36013	2.71898	4.53683	2.93925	2.39737	4.27486	7.0327	1.16932	1.5414	4.44103	4.20661	2.57614	1.91704	6.33887	7.30065	7.60026	2.1881	1.41556	2.70608	8.89392	4.55617	4.46073	6.73675	15.1333
24	8.061	7.35925	9.1873	1.52513239470003e+001*	8.20976	5.06922	7.56656	4.23091	5.64888	4.92443	5.50492	6.91298	4.73883	6.50382	3.6224	7.27577	5.6493	5.4894	10.9517			6.81656	4.36929	2.32655	7.59083	1.97357	2.80856	4.83739	2.83746	2.69208	4.14939	7.24351	0.804634	1.44421	5.09027	3.98921	2.08865	2.11274	6.36977	7.25544	7.47299	2.08723	1.42831	2.0778	8.63198	4.88316	4.91908	7.65672	14.8689
24.5	5.47216	10.9729	6.47505	7.51856	6.7324	4.92256	7.7074	4.57275	5.95843	5.25028	4.56979	7.70374	4.94557	5.99009	3.62088	5.15167	6.30664	5.8448	10.5784			7.32718	4.36892	1.58878	7.4296	2.26634	2.58968	4.3923	3.50403	2.61135	4.73967	7.00725	1.49015	1.59429	1.69785e+005*	1.27092e+005*	2.59513	2.22445	6.46367	7.22924	8.19624	2.29296	1.20839	2.36173	8.04712	4.83927	11.2028794*	7.13164	14.2768
25	5.34232	7.13859	10.6915	5.34388	6.49383	4.98821	7.6573	4.05594	5.75658	5.1478	4.29905	7.81691	5.03962	5.51773	3.80943	5.42684	6.12036	5.43715	10.7654			7.07212	4.56629	2.14062	7.33019	1.79374	3.42884	4.42729	3.97366	1.8181	5.53321	4.4711	1.36671	1.19168	4.75972	3.97531	2.50669	2.4498	6.42219	6.99754	7.66172	1.89588	1.78025	2.5686	8.25326	5.77296	8.97556	7.22694	15.4409
25.5	5.37875	6.99122	9.68458	5.92954	6.68332	4.55105	7.64738	4.55441	5.40243	5.01122	3.99016	8.36324	5.13731	6.27753	3.80494	6.10608	6.29306	5.46618	10.0902			7.03061	4.34514	2.29128	7.0144	1.79139	3.64637	4.24657	4.20191	2.49819	6.5327	8.79069	1.47201	0.700118	3.21394	4.14239	2.75438	5.67011	6.37037	7.09534	7.59976	1.99407	2.21193	2.16894	8.97468	5.36203	7.92794	7.61813	15.4379
26	5.61387	7.99986	10.2423	4.91061	7.46211	4.50785	8.04228	5.32311	6.17763	5.58255	3.60951	7.39589	5.10234	6.11491	3.65855	4.44462	5.84515	5.83467	10.2246			6.11477	4.30963	8.7838911*	8.44059	1.78025	3.54099	4.53562	4.03034	2.8328	5.5316	2.71568	1.51736	1.76111	5.00777	4.68133	2.67063	3.9097	6.52961	7.13311	8.13633	1.68861	1.94795	2.22084	7.73884	6.09095	4.60617	7.13438	15.696
26.5	5.45308	8.4384	9.51889	5.20146	7.06281	5.02793	7.87948	6.48234	5.94461	5.66759	4.54207	8.08459	3.39965	6.3399	3.82736	5.90317	5.29738	5.55445	10.4196			6.30946	4.3192	8.70215588*	8.16773	1.95819	2.50913	4.36344	3.51212	2.4486	4.61439	3.42871	1.20792	1.19599	5.27803	5.89901	2.80728	4.09137	6.3016	7.18712	8.21554	1.44711	1.421	1.85233	8.23815	5.55151	3.8214	7.1408	17.2998
27	4.69938	8.4518	9.64994	4.40293	6.93778	5.11138	6.80894	7.56517	6.34014	5.32851	6.26918	7.34851	4.66532	5.72955	3.45267	4.54591	4.38332	5.77499	11.2102			6.00644	4.17568	8.28063752*	7.25761	2.11292	2.27829	3.5429	3.36469	2.65631	4.30805	2.5593	1.74824	1.30223	4.95462	5.63031	2.72097	3.23806	6.4452	7.09736	7.62297	1.64248	1.46327	2.32255	7.76313	4.87761	3.65197	7.00745	17.5974
27.5	2.17206	8.39818	7.91064	4.36534	7.09458	5.79707	6.26365	7.81337	5.87976	4.9629	4.53876	7.11317	3.71228	5.12193	3.61855	4.73222	3.63766	5.98618	10.4419			5.94387	3.52303	8.8452829*	7.29724	2.60748	2.42785	4.04739	3.09735	2.4969	9.31827	3.70578	0.680867	0.429948	4.03782	6.02023	2.32975	4.1202	6.46041	7.18624	7.80561	1.90071	0.718882	2.51869	7.22953	4.8684	3.5778	7.57947	17.5371
28	3.27534	8.22399	8.35359	4.84457	6.88373	5.4572	6.02602	7.99017	6.49306	5.55059	4.8104	7.39249	1.84848	5.15716	3.92005	5.05781	3.89175	6.2603	10.2179			6.72659	3.33591	8.78137477*	7.13936	2.65208	2.77146	4.3032	3.41373	2.12107	8.9733	12.2238	2.00527	0.743535	4.75933	3.758	2.80655	4.71646	6.54467	6.94296	7.89679	2.4219	1.27725	2.39705	7.00517	4.68332	3.50765	7.78223	17.5924
28.5	2.8494	7.99948	9.20299	4.63929	6.37803	4.80664	15.0071	7.86589	6.75122	5.13346	3.76831	7.2038	3.58216	5.66138	4.51803	5.52309	5.06951	5.96754	9.81597			7.05173	3.45521	8.65956441*	6.82744	2.29013	1.62935	4.0383	3.90151	2.01006	4.35101	9.7305	1.1814	0.904749	4.06195	3.88161	2.60529	5.76721	6.38502	7.20125	7.75819	2.65495	1.48502	2.54568	6.57392	6.41257	3.97885	8.28814	14.8251
29	3.83375	8.39064	9.16256	3.73714	5.56139	4.52161	6.21557	7.09746	6.62869	4.89571	3.98797	7.04349	2.57461	6.06123	4.18295	6.4441	5.05258	6.53866	10.3053			6.62575	3.52224	2.17892	5.86501	2.55332	1.20679	3.98989	3.54067	2.04674	4.03748	3.75128	0.911899	4.14005	4.88372	4.32077	2.37464	1.9027	6.53193	7.27268	7.65621	2.26229	1.0081	2.76178	6.5183	5.59557	3.5228	7.92972	13.9987
29.5	3.75697	8.31405	8.7954	3.69295	6.37102	4.79954	6.89744	5.34849	6.74525	5.30394	3.39667	7.16158	3.60839	5.79781	3.57461	7.04772	5.34966	6.19281	10.927			6.71958	3.34032	2.5967	5.91282	2.07011	1.54605	4.43061	3.66982	2.02492	4.04595	4.32829	1.50769	4.69503	5.29086	5.46236	2.77284	6.59185	6.46857	6.95684	7.56225	2.4328	1.68935	2.69973	6.12029	4.73286	3.89075	7.53192	14.7238
30	4.07645	8.34698	9.47657	4.52516	6.22016	4.47675	6.92652	5.85008	6.84375	5.21014	4.82	7.63386	4.84471	5.91111	4.00851	7.27769	4.96201	5.72165	10.8333			6.30675	2.95196	2.749	5.71362	2.79157	2.94032	5.37923	3.63955	1.85936	4.1565	4.91937	1.94662	1.14414	4.60013	5.51857	2.7912	5.68514	6.38364	7.17723	7.80307	2.9411	2.10652	3.01051	6.35394	4.97424	6.12664	8.05485	14.4458
[truncated: 4 more columns]

## Sheet: Min distance 3-10min
Lysosomes-droplet minimum distance (µm) in 3-10min, on smoothed data
BSA	αIgG
2.87889	3.93999
4.11029	0.814407
4.25744	1.74833
4.77066	6.46646
5.99366	1.61707
3.32073	2.33832
4.3689	2.97703
2.90933	1.97164
3.45296	2.83522
4.54384	0.170515
3.39344	4.59668
3.74329	0.902164
7.4177	2.15383
8.00969	2.5385
4.36641	6.09144
10.3168	2.71467
4.41092	2.52259
4.64732	1.04255
6.38028	1.58682
	1.36561
	2.02048
	1.78969
	1.83193
	3.78159
	2.81366
	5.32979
	5.42805
	7.33051
	5.10774
	2.18499
	9.42673
	0.811318
