# Supplementary material for: Microtubules restrict F-actin polymerization to the immune synapse via GEF-H1 to maintain polarity in lymphocytes
Source: eLife journal article supplement (doi:10.7554/elife.78330), 2022-09-16
Supplement: supp [file Figure2F.xlsx]

## Sheet: Temporal data
Nucleus-droplet distance (µm)
Time (min)	BSA																								aIgG
0	4.59944	2.18826	4.72294	3.66927	4.1058	4.09408	5.32508	3.3107	3.85334	6.82377	5.04927	3.68541	4.91673	3.97762	3.8734	3.71826	3.96572	4.70801	4.63373	3.93375	4.36604	4.59679	3.21802		4.08454	5.73565	4.32395	4.8073	4.70254	4.19134	4.70272	4.44806	4.08024	4.61041	3.98152	3.14975	4.29162	4.22203	3.31507	5.26633	5.00077	4.44973	4.37488	4.30749	6.02501	3.68963	4.67414	3.58769	4.18952
0.5	4.09964	2.33956	5.03831	3.70197	3.49201	3.78574	4.4734	3.58818	4.02301	6.22946	4.57108	3.72218	3.43873	3.70037	3.67898	4.6178	4.08108	4.70447	4.89821	4.376	4.78513	4.84856	3.61456		4.37563	6.16248	5.17498	5.19888	4.85355	5.09375	5.20149	5.22193	4.40063	4.56754	3.86756	2.92468	4.47425	5.23905	3.46006	5.34746	6.44374	5.46942	4.11698	4.9882	5.71103	4.26921	4.36708	4.23322	3.93367
1	4.13565	2.59751	4.96171	3.41308	3.99146	4.14447	4.42751	4.2428	3.99583	6.3276	4.89788	4.81311	3.63772	4.34551	3.71034	4.06986	3.90073	4.99361	4.83475	4.0379	4.78933	5.59107	3.80628		4.5851	5.98919	10.0183139716852*	5.115	4.83297	5.35592	5.43165	5.2212	4.18097	5.51826	3.97763	3.46489	4.24169	5.2688	3.73419	5.35044	6.32323	5.7752	3.84896	5.164	5.61698	4.19402	4.78389	4.08798	4.74946
1.5	4.35238	2.96221	4.96864	3.4687	4.50278	4.73712	4.74085	4.75657	4.73932	6.41062	5.43468	4.78448	3.90978	4.45372	3.80252	4.49046	4.3191	4.80481	5.04392	3.97463	5.18286	5.45803	3.61341		4.72809	5.3834	9.97525148802771*	5.31926	4.80134	5.31529	5.08017	5.05129	3.84923	4.94956	4.01079	3.70568	4.34224	5.20226	4.07572	5.29781	5.84225	5.29956	3.74581	4.56882	5.3951	4.30541	5.21923	4.14866	4.96476
2	4.19351	3.18203	4.7389	3.30201	4.67926	5.79196	5.25287	4.65314	4.63464	6.72506	5.81779	5.40183	4.30375	5.81461	4.70709	5.37135	4.51965	4.86685	4.86618	3.85808	5.84647	5.1631	3.71587		4.78434	5.31031	10.2078349167392*	5.04901	4.75713	5.07826	4.82097	5.01193	3.58058	5.26943	4.09459	3.86386	4.25589	5.52973	4.03184	5.17785	5.50071	8.10717792355717*	3.39827	4.06877	5.4836	4.26732	5.22933	3.78394	5.21036
2.5	4.32325	3.2793	4.87436	3.04573	4.50727	5.10889	5.74133	4.01879	4.56696	6.09752	5.72168	5.35866	4.53805	4.66779	4.99837	5.05035	4.59107	4.9838	5.1979	4.70641	5.69668	5.07971	3.90312		4.30738	5.22748	4.61698	4.81164	5.25001	5.07259	4.85187	4.7014	3.54907	5.00049	4.29791	3.94752	4.20111	5.68411	4.10495	5.23905	5.71827	4.57291	3.22294	3.79138	5.39238	3.90307	5.16428	3.85555	5.14373
3	4.52778	4.31932	5.04658	3.32414	4.77319	5.09149	5.27745	4.27083	4.52425	5.9996	5.39523	5.29541	4.04924	4.83082	5.15503	4.88631	4.61321	5.05598	5.67667	4.31062	5.83734	4.56752	3.55191		4.23765	5.26174	4.81863	4.88134	4.92311	5.22723	4.81764	4.60679	3.51371	4.72078	4.48099	4.05094	3.93326	5.7333	4.33575	5.47763	5.85889	4.36407	3.53835	3.57696	5.40093	3.69674	5.25722	3.92052	4.9302
3.5	4.81911	4.29945	5.18824	2.69443	4.7739	5.30756	5.75378	4.20901	4.70958	6.88212	5.48424	5.46261	3.76723	4.59973	5.16906	4.84979	4.59031	4.94028	5.32897	4.44798	5.87353	4.82058	3.70274		4.57097	5.1654	4.59629	4.62301	5.20166	4.71933	4.91328	4.66184	3.56721	4.90251	4.77161	4.38397	4.24557	5.63795	4.34621	5.45718	6.17942	3.88509	3.65193	4.3626	5.24668	3.59353	5.08339	3.84041	4.85867
4	4.66682	4.19894	4.98953	3.16737	4.934	5.20904	5.70408	4.19243	4.75725	6.12285	5.09334	5.41846	3.70794	4.60261	4.96226	5.06749	4.51062	5.2211	5.61767	4.37555	6.29564	4.81423	3.55619		4.5259	5.06138	4.58922	4.11479	5.24502	4.37642	5.04182	4.40319	3.47823	4.88872	4.57269	4.19517	4.35313	5.25096	4.57831	5.64845	5.8973	3.99124	3.40766	4.60757	5.23551	3.6385	5.17204	4.01885	4.87156
4.5	4.28749	4.32073	4.98916	3.01568	4.90864	5.21414	5.412	4.47299	4.83138	6.13292	5.23313	5.6651	6.23249	4.6798	5.12868	5.18227	4.64601	5.42458	5.34053	4.50424	6.18489	4.81402	3.979		4.64501	5.02805	4.45715	4.41784	5.52431	4.42088	5.06902	4.22476	3.56294	9.94932315267545*	4.73009	4.19157	4.05951	5.32371	4.39878	5.55368	5.71231	3.78994	3.32173	4.30704	5.19335	3.78243	5.02579	3.77193	4.54567
5	4.84129	4.35931	5.08136	3.23781	4.85323	5.17864	5.60798	4.5854	4.95606	6.19204	5.09213	5.58264	3.55201	4.68696	5.05821	5.17567	4.73725	5.80007	5.39712	4.21922	5.80822	4.80761	3.79918		4.42142	4.87885	4.44259	4.22121	5.16021	4.48077	5.12722	3.85426	3.72867	4.9843	4.5719	4.02905	4.33966	5.07155	4.55783	5.28547	5.62478	3.94213	3.64634	4.19412	5.10841	3.7371	5.07474	4.20932	4.747
5.5	4.77561	4.51989	5.09937	3.66065	4.63135	5.31568	5.46973	4.71278	4.67744	6.31288	4.97719	5.61036	3.64023	4.69991	5.26912	4.77227	4.58336	5.56181	5.34727	4.41057	5.82544	4.78109	3.38843		4.3862	4.83216	4.50008	4.14517	5.11496	4.40649	5.18194	3.90271	4.00765	4.84737	5.03077	4.52681	4.53109	4.8719	4.63223	5.24845	5.44428	3.6353	3.50751	4.12652	4.89716	3.61633	5.03216	4.52969	4.78189
6	4.56691	4.56818	5.22313	3.52884	4.30959	5.41929	5.2396	4.82718	4.87065	6.33057	5.10652	5.31931	4.14568	4.51926	5.33592	4.46642	4.50128	5.46919	5.36742	4.68896	6.20508	4.74265	3.46384		4.54627	4.98811	4.02692	4.2233	5.14371	4.55149	5.19737	3.58519	3.84355	4.99376	5.26169	4.40383	4.47069	4.69624	4.4994	5.12721	10.3770798288117*	3.60106	3.74073	4.24124	4.99062	3.56702	4.86671	4.07226	5.36746
6.5	4.24028	4.39112	5.27264	3.37547	4.3735	5.49125	5.42233	4.79051	4.71213	5.86257	5.42252	5.43075	3.86745	4.69115	5.35706	4.78185	4.65746	6.03861	5.20645	4.39392	6.29884	4.69179	2.98053		9.91875498226841*	4.56833	4.04511	4.55878	5.20167	4.20744	5.27367	3.57422	4.03221	10.1932990056108*	5.36936	4.20983	4.20101	5.17659	4.66383	4.88479	5.23457	3.75923	3.7777	4.48865	4.98173	3.47809	5.1572	4.35012	5.27345
7	4.54945	4.69765	5.39423	3.96472	4.57109	5.48791	5.48171	4.80163	4.78487	5.89732	5.09365	5.34065	4.05544	4.86861	5.39316	4.80705	4.5059	5.98586	5.55844	4.73749	6.22427	4.85667	3.24403		9.68728259001187*	4.54402	8.08610692082136*	4.52462	5.30438	4.34972	5.31419	3.61244	3.9867	9.97409927433187*	5.76378	4.50531	4.05786	5.2743	4.58461	5.16552	5.13693	3.50959	3.76885	4.37687	5.61116	3.63901	4.94918	3.98019	5.48593
7.5	4.86845	4.53844	5.42273	3.38716	4.68994	5.28027	5.22793	5.15571	4.7152	6.07629	5.31722	5.54004	4.12241	4.75405	5.51731	4.86896	4.35629	5.67858	5.03167	4.51758	6.14856	4.809	3.66432		9.356216062327*	4.89511	3.86347	4.57883	5.01295	4.49453	5.12374	3.43993	4.17188	4.90396	5.97856	4.37337	4.29601	5.05981	4.71991	4.97548	4.9814	3.16753	4.16803	4.11065	5.52551	3.5487	4.98128	3.62355	5.72142
8	4.96718	4.54053	5.47274	3.74995	4.82766	5.48957	5.34847	4.89744	4.72887	6.25071	5.18924	5.22777	3.94875	4.81636	5.61655	4.74265	4.49718	5.80069	5.0614	4.70527	6.01392	4.76952	3.90444		9.68403505266016*	4.92593	4.11965	4.63997	5.10258	4.25036	5.50262	3.39926	4.4334	4.69577	6.0498	4.57282	4.24885	5.02189	4.38844	4.91477	5.05359	3.43112	4.06328	4.62329	5.63719	3.74383	4.77815	3.38206	6.20479
8.5	4.98845	4.3308	5.44464	4.28484	4.88919	5.26847	5.4688	4.88522	4.74521	6.02608	5.11914	5.04013	3.96798	5.10565	5.63984	4.91671	4.32608	5.46294	5.1126	4.95587	5.85707	4.70819	3.73176		4.14649	5.2553	4.15693	4.94971	4.99601	4.00118	5.82999	3.39614	4.42947	4.66421	6.07583	4.57959	4.11348	5.31616	4.81807	4.94048	4.76248	3.33026	3.97534	3.98944	5.59044	3.76025	4.94302	3.43374	6.27733
9	4.88993	4.17192	5.27882	3.62087	4.72322	5.26215	5.44628	4.91693	4.67477	6.20427	5.0643	5.01845	3.10458	5.00566	5.54013	4.88358	4.45233	5.64024	5.50564	4.65225	6.1169	4.76445	3.78268		4.45155	5.33892	4.28881	4.92544	5.24634	4.51449	5.67793	3.36264	4.50857	4.55754	6.10269	4.7199	3.85159	5.34573	5.0172	4.59813	4.64665	3.16261	4.19268	3.99766	5.28017	3.84764	4.57727	3.7926	6.76048
9.5	4.97931	4.32275	5.18585	3.16036	4.84616	5.20436	5.45737	4.92308	4.56904	6.25424	5.27717	5.40109	3.26845	4.97376	5.55227	5.09655	4.41649	5.36828	5.50839	4.55535	6.24166	4.95168	3.51987		11.3946803170378*	5.81097	4.47391	5.00732	5.2401	4.27283	7.17033216076697*	3.51697	4.68124	4.75103	6.3057	4.75758	4.12514	5.46618	4.93658	5.01098	4.51291	3.11252	4.46046	4.04216	5.89352	4.02608	4.71607	3.85492	6.57389
10	5.19585	4.07822	5.06332	3.22454	4.51441	5.08536	5.47024	5.0638	4.63735	6.07722	5.65697	5.35811	3.21673	4.98665	5.83058	4.93316	4.30521	5.37125	5.64382	4.70538	6.47358	5.01244	3.89144		4.47869	5.99063	4.4186	5.4018	5.95314	4.37431	5.78271	3.34928	4.54488	4.61846	6.46229	4.82394	4.53543	5.25299	5.0227	5.00077	4.63013	3.36929	4.68325	4.25503	5.74328	3.82969	4.55601	3.54714	6.60169
10.5	4.9847	4.1368	5.07446	3.08098	4.6654	5.17972	5.70198	5.20894	4.69112	6.10337	5.48343	5.19782	2.93591	4.9736	5.84082	4.94561	4.46694	5.46007	5.54515	4.68966	6.2397	5.10027	4.28336		4.64746	5.96993	4.03688	5.25008	5.82045	4.54664	5.52707	3.33702	4.7953	4.56772	6.23353	4.89978	4.26526	5.21305	5.37234	5.02085	4.83356	3.22891	4.40879	4.4011	5.42895	4.15921	4.44461	3.91321	6.76891
11	5.0583	4.16144	5.28362	3.42402	4.5429	5.15617	5.94397	5.33506	4.93889	6.21297	5.6967	5.27728	2.99412	5.0346	5.81599	5.04651	4.60106	5.34754	5.55277	4.7966	6.0455	5.0543	4.03673		4.33203	5.74578	4.25979	5.06979	5.66241	4.30285	5.87022	3.42419	4.61307	4.35881	6.55438	5.30301	4.13301	5.25086	5.55068	4.68903	4.85306	3.61482	4.38994	4.30373	5.72722	4.53155	4.57404	3.77528	6.94309
11.5	5.18483	3.94118	5.64611	3.8833	4.52254	5.20824	5.90872	5.21617	4.993	6.41593	5.38519	5.54581	2.76882	4.98172	5.88281	4.88893	4.45436	5.28644	5.62367	4.56668	5.76438	5.17486	4.16643		10.5506916872541*	5.78855	4.50302	5.06079	6.18677	4.08939	5.1776	3.68829	4.67128	4.31113	7.42524	5.12051	4.16871	5.3171	5.37492	4.8749	8.8723324222114*	3.85173	4.39974	4.41277	5.78648	3.74065	4.25958	3.85366	6.72001
12	5.16666	3.8928	5.6537	3.65018	4.63794	5.29159	5.65848	5.27226	4.89636	6.64131	5.54822	5.72439	3.11145	5.07919	5.93556	4.94061	4.397	5.27306	5.95565	5.2048	5.90252	5.14103	4.24523		4.25812	5.75375	4.67009	5.14251	5.95891	4.31775	5.18266	3.6432	4.82926	4.13693	7.65108	5.20573	4.0703	5.45584	5.43791	4.70675	7.74290634970117*	3.44125	4.44997	4.44113	5.73337	3.47866	4.29461	3.81458	6.63545
12.5	5.21575	3.80033	5.71538	3.2794	4.60235	5.38324	5.55094	4.74295	4.84082	6.57849	5.25786	5.86113	2.7133	4.98797	5.8001	5.17607	4.483	5.38553	6.49556	5.18786	6.39683	4.86603	4.65117		4.1892	5.4187	4.50262	4.76566	6.18167	4.33032	5.37783	3.62763	4.70748	4.60085	7.81154	5.42182	3.97974	5.29767	5.35319	5.00498	7.15179947097137*	3.62843	4.30012	4.02965	5.82072	3.48221	4.25766	3.95505	6.02497
13	5.63131	3.70219	5.45811	3.38978	4.59082	5.55521	5.45012	5.1024	4.8195	6.57548	5.14	5.49831	2.62475	4.90522	6.18837	5.18542	4.60378	5.49926	5.64218	4.80542	6.61209	4.68745	4.84372		4.16738	5.85011	4.84504	4.78818	6.14401	4.19721	5.4676	3.62428	4.65605	4.45965	8.43316	5.15322	4.19501	5.23547	5.18181	4.62946	5.03924	3.62794	4.63785	4.37178	6.0426	3.58469	4.54044	4.10672	6.13841
13.5	5.17891	3.9266	5.81997	3.34712	4.75134	5.53991	5.38021	4.62259	5.11078	6.31089	5.03335	5.51608	2.99098	4.66453	5.80052	13.7808730376249*	4.71531	5.57436	5.48291	4.81817	6.36448	4.99917	4.80369		4.54465	6.23847	5.50401	4.50689	6.24912	4.51431	5.58797	3.39228	4.79238	4.53491	8.32338	5.19533	4.32548	5.05541	5.34424	4.66318	4.83803	3.76705	4.69746	4.54591	6.32047	4.19482	4.25661	4.11208	5.5767
14	5.35081	3.74348	5.78766	3.43528	4.75513	5.67383	5.39421	4.69541	4.9828	6.36277	5.08754	5.01343	2.69428	4.78068	6.17473	5.08528	4.68412	5.53116	5.73585	5.15814	6.27874	4.96296	4.87431		4.32872	6.22008	5.64714	5.18317	5.88052	4.17392	5.48374	3.68169	4.49091	4.70676	9.46054	5.3201	4.22735	5.03759	5.38507	4.61069	5.50689	3.66617	4.8369	4.61153	6.47152	4.41498	4.52412	4.10552	5.58443
14.5	5.238	3.6797	5.52153	3.50462	4.53275	5.8692	5.28763	4.54498	4.95156	6.408	5.05525	5.25592	2.82791	4.91348	6.00691	5.18203	4.79343	5.74272	5.7907	4.67614	6.21653	5.28847	4.90651		4.16126	6.09393	5.9958	5.23583	6.13602	4.18602	5.30211	3.65953	4.68875	5.2854	10.2179	5.11726	4.43066	4.95802	5.07715	4.27755	5.19911	3.6254	4.47603	4.69605	6.04086	4.32063	4.42112	3.92149	6.15496
15	5.16987	3.6215	5.58044	3.88082	4.77843	5.47299	5.5017	4.6417	5.3295	6.29768	4.92809	5.31771	2.88153	4.92925	5.71054	4.95133	4.72321	5.73693	5.60336	4.67045	6.60641	5.13305	4.70706		4.02293	10.367438410314*	6.12256	5.81366	5.88007	4.13261	5.13854	3.69423	4.56755	4.7991	8.95696	5.04141	4.46556	5.19154	5.35675	4.5099	5.42859	3.61514	4.67414	4.64364	6.05119	4.55237	4.24564	3.98521	5.31334
15.5	5.17543	3.84443	5.57779	4.04051	4.81284	5.34881	5.58194	4.56815	5.08707	6.33814	5.30728	5.19622	2.83888	4.68882	5.69465	4.86942	4.75684	5.92508	5.8418	4.85353	6.61434	5.10661	4.53234		3.91226	10.9096523135513*	6.93987	7.8686194341923*	6.15758	4.27217	5.50839	6.79497678231207*	4.73227	5.02937	9.65303	5.33718	4.39543	5.37537	5.59118	4.18027	5.00605	3.71379	4.59121	4.47126	6.11279	4.25353	4.23534	4.08534	4.93256
16	5.4294	3.81883	5.81011	4.25442	4.80355	5.54874	5.28008	4.41052	4.7988	6.28152	5.32963	5.1591	3.30077	4.90951	5.87515	4.95626	4.72575	5.88898	5.9829	4.98929	6.55374	5.20254	4.66504		4.20483	12.0726711202765*	6.79755	7.59078330619166*	6.13642	4.52847	5.59396	6.63319688267349*	4.71272	5.00176	9.99807	5.47527	4.28162	5.17668	5.36323	4.2458	4.94501	3.83879	4.83697	4.5543	6.41646	4.47466	4.40558	3.71479	4.85432
16.5	5.63013	3.67929	5.71354	3.96799	4.85562	5.37867	5.4642	4.50776	4.82596	6.34255	5.5977	5.45437	2.7343	5.1127	5.78726	4.98294	4.84717	5.86061	5.80291	4.92211	6.64754	4.92802	4.64245		4.18509	10.3915209127459*	6.7989	7.35845425680058*	6.23674	4.10779	5.99655	6.81082030006787*	4.54506	5.18067	9.20662	5.27533	4.71318	5.25824	5.45171	4.50962	4.91964	3.76809	4.72679	4.32449	6.19938	4.36186	4.45677	3.9277	4.55924
17	5.09235	3.95028	5.65755	3.55756	4.73641	5.30142	5.93237	4.61739	4.84817	8.6035	5.77567	5.41955	2.93157	5.25105	5.94129	4.90636	4.87839	5.92605	5.56963	4.92182	6.85608	4.87878	4.29015		4.48411	11.7919453682593*	6.78007	7.82297112982673*	6.10499	3.96003	5.58577	6.81830034765045*	4.6425	4.96609	8.34882	5.12003	4.56337	5.14124	5.29859	4.57702	4.91156	4.24818	4.75501	4.25727	6.15432	3.89729	4.6299	4.18782	4.27925
17.5	5.40921	3.66917	5.7183	3.99371	4.40012	5.25811	5.48905	4.46337	4.80111	8.14869	5.62772	5.52932	2.84193	4.90505	5.84573	4.89369	4.92274	5.77042	5.42713	4.89111	7.03671	4.84976	4.82895		5.35396	9.82643	7.22591	6.86702	6.12847	4.16328	5.51043	7.06778454571719*	4.53251	5.02117	7.26721	5.22024	4.6959	5.20427	5.38619	4.56042	5.28804	3.58794	4.7584	4.55459	6.3989	3.86546	4.75466	3.98777	4.52858
18	5.35815	3.67857	5.68591	4.08514	4.28499	5.36989	5.77365	4.78239	5.18084	8.9587	5.3347	5.21708	2.91359	4.81694	5.79045	4.98004	4.76801	5.71274	5.39055	4.24675	6.59991	5.04872	4.45898		4.35703	10.6800776452871*	7.21495	6.4029	5.63747	4.18331	5.30663	6.96554351707966*	4.68877	5.07476	7.82311	5.09695	4.72859	5.35268	5.34847	4.63382	4.96813	3.6663	4.42354	4.62167	6.04132	3.92941	4.92303	4.32311	4.20566
18.5	5.34207	3.68589	5.73073	4.24879	4.46768	5.35154	6.15378	4.53343	5.14427	5.77119	5.27319	5.23616	2.98627	4.80681	5.82703	4.87139	4.8999	5.56342	6.1766	4.72019	6.36145	4.97792	4.53925		4.40073	10.933756382522*	7.271	6.5524	5.91046	3.96695	5.3163	3.78081	4.76062	5.28108	7.28609	5.10286	4.84863	4.98443	5.24773	4.75283	4.7969	3.65682	4.62446	4.45438	6.09323	4.07055	4.81824	3.82793	4.32586
19	5.41636	3.72699	5.5953	4.02709	4.44901	5.41411	5.31857	4.58798	5.36389	5.86058	5.48528	5.26922	3.10184	4.82411	5.9384	4.73054	4.99115	5.78186	5.61376	4.60124	6.64965	4.95183	4.40568		4.61021	10.6174465370215*	7.70507	5.91965	6.55844	3.78694	5.25412	3.71335	4.86819	5.04801	7.1401	5.07505	4.69334	4.95489	5.1022	4.61192	4.98769	3.94046	4.69537	4.7647	5.94915	4.06554	4.86059	4.06847	4.43051
19.5	5.18424	3.81549	5.66697	3.7233	4.44154	5.66042	5.74142	4.87643	4.83336	6.08815	5.4527	5.07194	3.09054	4.74569	5.94903	4.80782	5.07779	5.62238	5.95423	4.74679	6.78397	4.88798	4.8201		4.52534	9.6233	7.70542	5.72957	6.15721	3.86429	5.20662	3.92205	5.02368	5.13557	7.2312	5.01015	4.54241	5.23046	5.31948	4.93395	5.10522	3.79537	5.10082	4.50849	6.21846	4.01324	4.59603	4.41873	4.74504
20	5.5825	3.72486	5.63498	3.83252	4.26466	5.52405	6.01993	4.5793	4.69675	5.92639	5.32051	5.16351	3.62452	4.74083	5.77773	4.76592	5.27623	5.6146	5.82462	5.11132	6.7757	4.95383	4.7567		4.82466	8.93819	7.65073	6.51142	6.22806	3.70075	5.54015	3.79414	5.03929	4.77384	8.32259	5.1133	4.56896	5.34533	5.33148	4.81012	4.74019	3.68132	4.90039	4.48197	6.24161	4.20467	4.74185	4.26056	4.63376
20.5	5.44239	3.81103	5.41355	3.89723	3.924	5.59796	5.64736	4.73828	4.85806	6.00308	5.55632	5.19336	3.32066	4.84318	6.03437	5.16778	5.28713	5.33631	6.21592	5.29698	6.92692	4.94324	4.71528		4.9557	8.35925	7.5933	6.93767	5.87762	3.88386	5.26541	3.8795	4.78545	10.3003228782133*	8.58972	5.18448	4.48719	5.35889	5.54322	4.70973	4.82206	3.65555	5.38822	4.49936	6.39144	4.42432	4.6007	4.34321	4.59796
21	5.33057	3.68948	5.57557	4.19524	4.05093	5.51443	5.55898	4.57953	4.59629	5.73657	5.62675	5.13844	3.62957	4.68229	5.90589	4.97977	4.9258	5.41774	5.94708	4.84305	6.71674	5.10684	4.61855		4.69539	8.60632	7.78131	6.52002	5.76136	4.13468	5.49015	3.84105	4.94173	4.93347	8.41072	5.42828	4.63434	5.10607	5.37968	4.90756	4.61529	3.61333	5.89778	4.29358	6.50484	4.31423	4.63606	4.76133	4.75722
21.5	5.15577	3.7275	5.5095	3.92855	3.96674	5.46168	5.31893	4.54232	4.67158	5.74729	5.39555	5.42245	3.47765	4.664	5.75511	4.83496	5.046	5.18167	5.70987	5.19489	6.49532	4.64888	4.84651		4.95697	7.46221	7.93886	5.86044	5.4884	4.56886	8.69065854780494*	4.74967	4.73214	5.16186	8.47588	5.04473	4.94713	5.03776	5.44146	4.66766	4.69973	3.62632	6.11054	4.56251	7.02313	4.37658	4.7257	4.59117	4.81057
22	5.38902	3.76975	5.56982	3.86342	4.09613	5.27565	5.20824	4.43151	4.67946	6.25279	5.60923	5.26181	3.42024	4.66012	5.82224	4.80249	5.27604	5.51031	5.59541	5.08192	6.44909	4.80211	4.59663		4.88601	6.86028	8.72615	5.77926	5.89325	4.54272	8.16133942204937*	3.60953	4.85713	5.08055	7.78062	5.00756	4.93058	5.15562	5.56248	5.05723	4.94714	3.71527	6.09595	4.70011	6.26822	4.15401	5.04498	4.96319	4.70621
22.5	5.12675	3.84443	5.51621	4.05945	4.25358	5.35383	5.50965	4.32355	4.82844	6.27601	5.55243	7.80505	3.18084	4.72221	5.68906	4.61963	5.19772	5.22663	5.72492	5.15509	6.20858	4.63798	4.64163		4.80603	7.38894	8.60311	6.77255	5.9073	4.75143	8.02733869442295*	3.49493	4.91485	5.38955	7.44482	5.19619	4.39962	5.27874	5.55656	4.95436	5.13054	4.04359	5.53036	5.05323	6.54942	4.30888	5.32388	5.12951	4.76716
23	5.07322	3.8281	5.37287	4.12713	4.06336	5.24124	5.40744	4.11558	4.53159	6.20616	5.66842	5.03038	3.38302	4.64023	5.95587	4.78892	5.01553	5.33212	5.35967	5.4299	6.36556	4.7344	4.71314		8.28899502413692*	8.05922	9.04616	6.46339	5.59953	4.33292	8.1304020415011*	3.63878	5.21481	5.23435	7.81047	5.04947	4.79602	5.05714	5.19637	4.9208	5.08035	3.31907	5.27261	5.16503	6.3404	4.27094	5.05891	5.15311	4.68716
23.5	5.39003	3.97551	5.15841	3.91089	4.06642	5.37122	5.24668	4.44931	4.43293	5.74379	5.67913	5.11483	3.26041	4.71969	5.89992	4.56099	4.739	5.39462	5.4663	5.08995	6.12249	4.91247	4.46815		4.80162	8.13435	9.31436	6.77981	6.04586	4.30611	7.90202115850639*	3.78157	5.12377	5.39624	8.88981	4.94769	4.72675	5.33894	5.50805	4.97589	4.67525	3.54784	5.73839	5.37742	6.37695	4.3951	4.86937	5.02949	4.76406
24	5.52535	4.06081	5.19781	3.7837	3.80543	5.40438	5.02268	4.29375	4.51998	5.87407	5.90643	5.26575	3.2226	4.66909	6.04617	4.76143	4.86447	5.43782	5.3055	5.00847	6.52865	4.77745	4.78801		4.82562	7.82259	8.94074	6.61225	5.94753	4.68818	7.12255	3.67046	5.06101	5.06849	8.39215	5.25227	4.7241	5.1092	5.29465	5.28887	5.0072	3.60676	5.86064	5.12506	6.97578	4.35692	4.80105	5.03336	4.68709
24.5	5.40205	4.10061	5.47189	4.11622	4.15966	5.43285	5.02555	4.31339	4.40578	6.14146	5.8124	4.96499	3.23888	4.68185	5.87352	5.00098	4.74477	5.37237	5.40289	5.05624	6.35985	4.76248	4.68523		5.09083	7.94813	8.93677	6.79795	6.13037	5.00257	6.58661	3.4528	5.05934	5.09555	8.33026	5.3269	4.73739	5.09667	5.37185	5.47852	5.18656	3.61594	5.79489	5.02981	6.49935	4.28464	5.23748	4.91371	4.63682
25	5.13964	4.02168	5.43912	3.86153	3.85024	5.22736	4.83688	4.00894	4.25538	6.21235	5.8899	4.87771	3.02197	4.58079	5.99405	4.8722	4.4677	5.5595	5.45027	5.29069	6.25628	4.76808	4.61418		10.6569140107232*	8.17378	9.28771	7.00465	5.99541	4.89689	5.71893	3.59855	5.18772	5.39397	7.74234	5.37324	4.79871	5.1371	5.50343	4.98354	4.92014	3.39815	5.89119	5.33527	6.78125	4.45389	5.14801	5.09104	4.46728
25.5	5.39744	4.17966	5.22394	3.65906	3.93855	4.70453	4.89333	4.37859	4.31181	6.07401	5.69042	4.89761	2.88549	4.50439	5.91921	4.91717	4.62512	5.26866	5.61263	5.63913	6.25233	4.46927	4.66365		10.5605199060803*	8.20889	9.42443	7.00525	6.17693	4.68926	6.06064	3.82205	4.88803	5.26458	7.84136	5.52497	4.82644	5.28359	5.4922	5.1227	5.01606	3.60586	5.82726	5.76935	6.28447	4.68111	5.16213	4.80394	4.56327
26	5.36224	4.2394	5.38932	4.30442	3.84924	4.55335	5.22354	3.99686	4.12875	6.15273	5.49645	4.88916	2.94136	4.55697	5.82199	4.88027	4.71536	5.08783	5.36022	5.4963	6.43361	4.40121	4.6279		4.84212	8.40181	9.81459	7.37799	5.9659	4.72597	6.99231	3.88705	4.86905	5.17422	7.53216	5.33647	4.96569	5.41101	5.5014	5.34953	5.20694	3.8924	5.98368	5.29638	6.22311	4.4945	5.32924	4.99487	4.41954
26.5	5.4768	4.03336	5.47417	3.66486	3.66417	4.86889	4.9847	4.08822	4.1711	6.34367	5.87229	5.0772	2.92033	4.65834	5.91067	4.81034	4.64507	4.82738	5.30686	5.40995	6.28082	4.67295	4.62726		4.80157	8.34599	9.60529	7.68967	5.93504	4.73045	6.68617	3.72813	4.87115	5.16376	7.28894	5.27982	4.71118	5.40027	5.42503	5.52583	5.09319	3.58082	6.89576	5.51529	6.73253	4.96221	5.36941	5.13726	4.62442
27	5.52599	4.14315	5.61855	3.90646	3.51695	4.97535	4.84263	4.13983	4.17578	6.27148	5.50709	5.17843	2.96446	4.56511	5.48023	4.74843	4.74735	5.04918	5.31185	5.39893	6.47348	4.58422	4.6886		4.66136	8.44386	10.4898	6.93777	5.87111	4.77406	5.97704	3.31028	5.08935	5.04776	7.51255	5.45529	4.76437	5.6963	5.67217	5.19676	5.34534	3.75224	6.7715	5.36032	6.38528	5.12544	5.26222	4.8367	4.50145
27.5	5.92399	3.93963	5.45859	4.44963	3.27085	5.07664	5.03946	4.21089	4.28771	6.35723	5.6226	5.21161	3.44585	4.6467	5.60448	5.14457	4.74448	4.97465	5.53822	5.87843	6.23926	4.55517	4.50572		4.93196	8.40545	10.5471	7.54721	6.08765	4.96962	6.3876	3.57611	5.07226	5.24205	7.94346	5.39499	4.84073	5.46153	5.52824	5.65242	5.41711	3.95025	6.87148	4.89373	6.55924	4.65276	5.45831	4.90458	4.5642
28	5.6407	3.69572	5.51446	4.68455	3.31548	4.94743	5.01371	4.32392	4.50262	6.65399	5.32396	5.10125	2.96462	4.60512	5.67221	5.07513	4.5818	4.92723	5.50191	5.42249	6.17319	4.77771	4.74986		4.87756	8.73939	10.6288	7.72489	6.12626	4.9587	5.88171	3.74544	4.97843	5.14422	7.73489	5.34754	4.82307	5.30647	5.50483	5.379	5.33199	3.95495	7.37111	4.93782	6.67057	4.4632	5.74312	5.05535	4.50496
28.5	5.6107	3.6854	5.62496	3.88416	3.45859	5.03533	4.8544	4.11706	4.56808	6.64941	5.33638	4.88895	3.39661	4.67213	5.46766	5.12925	4.48715	4.62121	5.51017	5.51753	6.32477	4.81033	4.88797		4.88458	8.78683	10.2773	7.98284	6.17652	4.69648	5.91561	4.03217	4.86737	5.08887	8.53579	5.07636	4.93031	5.14685	5.55019	5.39538	5.28799	4.2527	7.10417	4.87628	6.77264	4.38354	5.43611	5.07381	4.54503
29	5.34073	3.74314	5.61593	3.45909	3.43309	5.29177	4.94822	3.98936	4.42993	6.66385	5.29077	5.14123	3.34997	4.60432	5.6346	4.95652	4.43312	4.61626	5.28882	5.4249	6.59897	4.8769	4.62788		4.65518	8.64288	9.98797	8.13953	6.06075	4.9425	5.78591	3.83925	4.69781	4.95722	7.59582	5.43614	5.12512	5.16517	5.39232	5.67148	5.23138	3.97466	7.3344	4.75922	6.37522	4.21354	5.51051	5.21093	4.74407
29.5	5.55682	3.65778	5.52349	3.44293	3.213	5.5757	5.14947	3.79254	4.31175	6.6048	5.27271	4.9458	3.21975	4.55538	5.61575	5.05247	4.1728	4.4898	5.44722	5.53677	6.46783	4.89353	4.57063		4.82453	8.52792	10.1193	8.29886	6.40512	5.09835	5.87048	4.25147	4.98626	5.08055	7.8362	5.18526	5.02968	5.12646	5.26406	5.45096	5.31524	3.99153	7.10184	4.68478	6.68471	3.938	5.78469	5.31661	4.79149
30	5.31115	3.7547	5.61007	3.23407	3.28044	5.46706	5.30993	3.70885	4.19685	6.57577	5.43726	4.79295	3.23887	4.64819	5.74898	5.10314	4.172	4.73549	5.30394	5.71118	6.44672	4.98678	4.78585		4.87805	8.76875	9.96573	8.02938	6.45766	5.136	5.95444	4.23092	4.84686	5.30588	7.83919	5.33827	4.7353	5.27076	5.44331	5.67644	5.22262	4.14826	6.67784	4.92287	6.98993	4.20061	5.4457	5.41201	4.73631
Average distance 25-30min	5.48056	3.9176	5.49933	3.86825	3.52642	5.06576	5.00875	4.06864	4.30362	6.41448	5.5218	5.00017	3.12266	4.59977	5.71544	4.97177	4.52654	4.92338	5.4211	5.52057	6.35884	4.70874	4.66814		4.81744	8.49505	10.0135	7.61255	6.1144	4.87439	6.1119	3.82013	4.9413	5.16937	7.76388	5.34076	4.86824	5.30959	5.47974	5.40037	5.21709	3.8638	6.71184	5.12285	6.58718	4.50626	5.42268	5.0761	4.58746
[truncated: 9 more columns]
