# Supplementary material for: Microtubules restrict F-actin polymerization to the immune synapse via GEF-H1 to maintain polarity in lymphocytes
Source: eLife journal article supplement (doi:10.7554/elife.78330), 2022-09-16
Supplement: supp [file Figure2G.xlsx]

## Sheet: Sheet 1
Characteristic times of polarization for cells in contact with aIgG-coated droplets							Ignored cells on given criteria ( detailed in paper, corresponding to empty spaces here)
Actin peak	DAG peak	Centrosome 2um (cells starting >3um)	Golgi <4um for cells starting >5um	Lyso <3um for starting >4um	Nucleus <45° for cells starting >50°	Nucleus last minima
1	5	4	9		9.5	15.5
6.5	3.5			4.5		7
1.5	4	5.5			1.5	7.5
4	0.5
3.5	2			1.5	17	22
0.5	9.5	9		6		21.5
0.5	3	4	14	6.5	22.5	20
5.5	7	2	8		4.5	19.5
2	10	7.5	6	10.5	1.5	10.5
5.5	3	3	6.5		8.5	17.5
5	1	4.5	4			12
0.5	1.5	7.5	5.5	7.5	8	19.5
0.5	2			5	15.5	22
4.5	4	8		4.5		12.5
0.5	1.5	4.5	16	32		19
1.5	9.5	7	1	7	18	19
9.5	7.5			3.5	6	16
1	2	5				10
3	1.5	5.5		6		9.5
3	10	6		3.5		18.5
3.5		4.5		6.5		17
3.5		9.5				6.5
2				5	8	12.5
6		4.5			19.5	15.5
9		4.5		6.5	14	8.5
				32.5	8	18
					5	11
					5	21
					2.5	7.5
				4.5		19.5
					27.5	24
						9
					5.5	7
					4.5	8.5
					7.5	12.5
