# Supplementary material for: Microtubules restrict F-actin polymerization to the immune synapse via GEF-H1 to maintain polarity in lymphocytes
Source: eLife journal article supplement (doi:10.7554/elife.78330), 2022-09-16
Supplement: supp [file Figure3B_C_D.xlsx]

## Sheet: 3B Nucleus Angle Plateau 
Average Nucleus angle 25-30 min
BSA	aIgG
108.723	30.7651
21.0279	11.1118
29.9348	38.9349
98.7302
87.1919	18.8358
108.625	27.4396
79.861	38.0114
165.443	52.5872
141.215	30.0515
41.0256	17.459
64.0942	20.1079
51.386	22.8057
126.642	46.7556
98.4554	41.535
27.9679	24.2406
132.987	45.8917
60.3178	17.3594
92.4553	62.492
49.9996	22.078
29.2489	22.4764
28.9661	18.1983
94.6027	11.0152
26.3803	18.1226
	26.7748
	15.0417
	59.9629
	97.6557
	18.223
	20.3653
	15.9181
	45.0866
	25.6162
	30.3574
	52.1682
	32.3047

## Sheet: 3C Temporal aIgG
Nucleus-droplet distance and Orientation (as described in Figure 3A) of the nucleus, for IIA1.6 cells in contact with aIgG-coated droplets
Time (min)	Distance																																			Angle
0	4.08454	5.73565	4.32395	4.8073	4.70254	4.19134	4.70272	4.44806	4.08024	4.61041	3.98152	3.14975	4.29162	4.22203	3.31507	5.26633	5.00077	4.44973	4.37488	4.30749	6.02501	3.68963	4.67414	3.58769	4.18952	4.00718	4.04393	3.81039	4.46534	3.78603	4.61687	3.8027	5.87485	3.44796		117.742	12.7961	80.3061	120.356	40.0016	98.3015	75.5179	77.2474	129.647	16.8425	97.3466	118.317	12.4759	8.76761
0.5	4.37563	6.16248	5.17498	5.19888	4.85355	5.09375	5.20149	5.22193	4.40063	4.56754	3.86756	2.92468	4.47425	5.23905	3.46006	5.34746	6.44374	5.46942	4.11698	4.9882	5.71103	4.26921	4.36708	4.23322	3.93367	3.81242	5.28372	3.74263	4.69758	4.13927	4.59431	3.97799	5.67214	4.15173		112.116	25.6127	68.7509	130.537	45.3485	106.762	99.9355	42.7529	132.788	16.3325	100.758	118.403	11.1216	27.4031
1	4.5851	5.98919	10.0183139716852*	5.115	4.83297	5.35592	5.43165	5.2212	4.18097	5.51826	3.97763	3.46489	4.24169	5.2688	3.73419	5.35044	6.32323	5.7752	3.84896	5.164	5.61698	4.19402	4.78389	4.08798	4.74946	4.24252	5.40473	3.78737	4.50745	4.15234	4.73281	7.16098732848319*	6.21528	4.47059		87.7441	28.9555	37.6149	127.298	20.6426	96.128	67.6371	47.5658	124.721	4.999	76.9679	132.297	13.7297	11.3208
1.5	4.72809	5.3834	9.97525148802771*	5.31926	4.80134	5.31529	5.08017	5.05129	3.84923	4.94956	4.01079	3.70568	4.34224	5.20226	4.07572	5.29781	5.84225	5.29956	3.74581	4.56882	5.3951	4.30541	5.21923	4.14866	4.96476	4.6413	4.61952	3.83532	4.3942	4.04664	5.22055	4.29979	6.39297	4.62425		113.361	30.5292	37.5355	130.523	15.6363	90.9784	76.8695	7.7175	120.055	25.6396	96.3885	119.556	26.5696	23.9663
2	4.78434	5.31031	10.2078349167392*	5.04901	4.75713	5.07826	4.82097	5.01193	3.58058	5.26943	4.09459	3.86386	4.25589	5.52973	4.03184	5.17785	5.50071	8.10717792355717*	3.39827	4.06877	5.4836	4.26732	5.22933	3.78394	5.21036	5.03119	4.62672	4.18164	4.20344	4.0669	9.68074305782926*	4.05072	6.59989	4.42272		101.621	18.4958	38.0467	114.4	12.0515	90.3775	62.0894	21.0344	100.794	35.1997	83.2599	132.396	4.63923	40.0103
2.5	4.30738	5.22748	4.61698	4.81164	5.25001	5.07259	4.85187	4.7014	3.54907	5.00049	4.29791	3.94752	4.20111	5.68411	4.10495	5.23905	5.71827	4.57291	3.22294	3.79138	5.39238	3.90307	5.16428	3.85555	5.14373	5.16153	4.05524	4.16554	3.92858	3.81562	7.991180752918*	4.123	6.28898	4.43923		126.433	27.3283	62.0632	117.478	10.226	102.544	84.6797	2.34503	98.0009	32.203	70.8452	112.219	21.1367	33.1059
3	4.23765	5.26174	4.81863	4.88134	4.92311	5.22723	4.81764	4.60679	3.51371	4.72078	4.48099	4.05094	3.93326	5.7333	4.33575	5.47763	5.85889	4.36407	3.53835	3.57696	5.40093	3.69674	5.25722	3.92052	4.9302	5.12953	4.12812	4.17374	3.59665	3.67539	6.20494	4.08274	6.18639	4.17234		97.8698	16.6318	62.0167	114.559	20.1585	101.32	69.7219	13.1436	91.3422	29.6074	57.3207	94.7021	21.1185	18.9402
3.5	4.57097	5.1654	4.59629	4.62301	5.20166	4.71933	4.91328	4.66184	3.56721	4.90251	4.77161	4.38397	4.24557	5.63795	4.34621	5.45718	6.17942	3.88509	3.65193	4.3626	5.24668	3.59353	5.08339	3.84041	4.85867	4.67205	4.35642	3.96415	3.30979	3.46921	6.18609	3.94195	6.00737	4.12254		101.203	37.32	65.5698	118.455	24.4251	105.623	48.417	8.39572	70.3465	21.6666	61.5134	106.309	27.3427	14.5154
4	4.5259	5.06138	4.58922	4.11479	5.24502	4.37642	5.04182	4.40319	3.47823	4.88872	4.57269	4.19517	4.35313	5.25096	4.57831	5.64845	5.8973	3.99124	3.40766	4.60757	5.23551	3.6385	5.17204	4.01885	4.87156	5.23569	4.28825	3.9673	3.22609	3.51784	6.17636	4.07189	5.6075	4.1424		74.8577	21.0794	64.4195	128.579	27.048	92.4941	40.5327	12.6707	74.9858	25.8027	52.9642	98.7175	16.1479	26.9907
4.5	4.64501	5.02805	4.45715	4.41784	5.52431	4.42088	5.06902	4.22476	3.56294	9.94932315267545*	4.73009	4.19157	4.05951	5.32371	4.39878	5.55368	5.71231	3.78994	3.32173	4.30704	5.19335	3.78243	5.02579	3.77193	4.54567	5.15645	4.23953	3.89614	3.1168	3.68673	11.9163023950839*	4.00619	6.17803	4.14549		85.9837	19.4812	65.881	130.899	29.6378	77.5348	27.2196	69.3005428661681*	62.7399	12.5081	46.5779	110.225	44.8845	40.8836
5	4.42142	4.87885	4.44259	4.22121	5.16021	4.48077	5.12722	3.85426	3.72867	4.9843	4.5719	4.02905	4.33966	5.07155	4.55783	5.28547	5.62478	3.94213	3.64634	4.19412	5.10841	3.7371	5.07474	4.20932	4.747	5.33786	4.34063	3.66748	2.96193	4.00582	6.32361	3.98426	5.50928	4.10959		84.301	21.9715	66.259	124.627	40.348	84.849	33.6432	20.9625	69.4442	8.03543	51.3612	107.073	34.9435	40.0443
5.5	4.3862	4.83216	4.50008	4.14517	5.11496	4.40649	5.18194	3.90271	4.00765	4.84737	5.03077	4.52681	4.53109	4.8719	4.63223	5.24845	5.44428	3.6353	3.50751	4.12652	4.89716	3.61633	5.03216	4.52969	4.78189	5.35022	4.28069	3.83529	3.17203	4.03553	6.32678	3.97421	5.63341	4.05521		102.077	21.0359	67.4189	135.904	35.6713	62.1187	30.7872	7.41346	68.3882	4.53503	46.6388	103.872	44.151	18.6037
6	4.54627	4.98811	4.02692	4.2233	5.14371	4.55149	5.19737	3.58519	3.84355	4.99376	5.26169	4.40383	4.47069	4.69624	4.4994	5.12721	10.3770798288117*	3.60106	3.74073	4.24124	4.99062	3.56702	4.86671	4.07226	5.36746	5.20529	4.15736	3.62899	3.17599	3.93771	6.37206	3.79594	5.64563	4.22877		74.1389	24.225	71.2604	127.832	27.8943	70.1679	44.4081	16.3948	47.3725	20.7713	53.3123	105.855	23.8125	49.2007
6.5	9.91875498226841*	4.56833	4.04511	4.55878	5.20167	4.20744	5.27367	3.57422	4.03221	10.1932990056108*	5.36936	4.20983	4.20101	5.17659	4.66383	4.88479	5.23457	3.75923	3.7777	4.48865	4.98173	3.47809	5.1572	4.35012	5.27345	5.54595	4.93754	3.62788	3.14983	3.99307	6.40439	7.55362180397709*	5.6708	4.31393		4.02939705279852*	22.1635	75.9597	137.029	28.9937	53.2744	37.2741	15.665	49.0399	15.8154	48.0398	89.0468	40.8057	59.7735
7	9.68728259001187*	4.54402	8.08610692082136*	4.52462	5.30438	4.34972	5.31419	3.61244	3.9867	9.97409927433187*	5.76378	4.50531	4.05786	5.2743	4.58461	5.16552	5.13693	3.50959	3.76885	4.37687	5.61116	3.63901	4.94918	3.98019	5.48593	5.89922	4.95701	3.52982	3.12289	3.94825	12.4981132798513*	3.61952	5.91352	4.4164		4.14022907768983*	9.54465	43.6474653499396*	138.039	33.5068	94.4417	21.5385	29.811	52.0365	17.4475	48.4458	88.869	40.7638	49.3292
7.5	9.356216062327*	4.89511	3.86347	4.57883	5.01295	4.49453	5.12374	3.43993	4.17188	4.90396	5.97856	4.37337	4.29601	5.05981	4.71991	4.97548	4.9814	3.16753	4.16803	4.11065	5.52551	3.5487	4.98128	3.62355	5.72142	5.60849	4.78943	3.57715	3.47712	4.09795	11.2497398351223*	3.78334	5.64967	4.5384		4.66367244935185*	0.227904543089881*	72.031	142.16	32.7359	85.9555	22.6258	20.2149	49.7872	20.2733	41.8096	83.1689	54.7903	51.4202
8	9.68403505266016*	4.92593	4.11965	4.63997	5.10258	4.25036	5.50262	3.39926	4.4334	4.69577	6.0498	4.57282	4.24885	5.02189	4.38844	4.91477	5.05359	3.43112	4.06328	4.62329	5.63719	3.74383	4.77815	3.38206	6.20479	5.31868	4.95144	3.60502	3.32626	4.40815	5.91782	3.81787	5.38655	4.5449		2.12494169893539*	16.1378	68.9045	140.631	26.3234	83.107	14.6526	23.7774	41.7512	41.6347	24.3816	75.5377	53.4986	41.8059
8.5	4.14649	5.2553	4.15693	4.94971	4.99601	4.00118	5.82999	3.39614	4.42947	4.66421	6.07583	4.57959	4.11348	5.31616	4.81807	4.94048	4.76248	3.33026	3.97534	3.98944	5.59044	3.76025	4.94302	3.43374	6.27733	5.52295	5.00279	3.64903	3.29422	4.42437	7.66396	7.57217358945258*	9.49656079212424*	4.49974		46.3854	12.2394	67.9428	128.309	32.955	68.5489	31.797	15.1246	27.0477	34.5283	29.1914	78.5659	71.3366	20.4667
9	4.45155	5.33892	4.28881	4.92544	5.24634	4.51449	5.67793	3.36264	4.50857	4.55754	6.10269	4.7199	3.85159	5.34573	5.0172	4.59813	4.64665	3.16261	4.19268	3.99766	5.28017	3.84764	4.57727	3.7926	6.76048	5.33131	5.06169	3.63074	3.16765	4.88633	6.0403	4.082	5.6502	4.48753		44.0957	22.2359	69.0752	130.693	29.5138	53.0983	23.0929	25.4994	50.9828	37.0718	37.9448	76.6583	68.2505	3.3877
9.5	11.3946803170378*	5.81097	4.47391	5.00732	5.2401	4.27283	7.17033216076697*	3.51697	4.68124	4.75103	6.3057	4.75758	4.12514	5.46618	4.93658	5.01098	4.51291	3.11252	4.46046	4.04216	5.89352	4.02608	4.71607	3.85492	6.57389	5.3835	5.36935	3.49461	3.3249	4.59901	6.11263	4.26083	5.72355	4.32822		26.5892	17.5178	65.4758	132.522	16.1246	51.2667	19.2718	8.87978	29.7034	22.6739	29.9887	86.8085	46.579	6.23883
10	4.47869	5.99063	4.4186	5.4018	5.95314	4.37431	5.78271	3.34928	4.54488	4.61846	6.46229	4.82394	4.53543	5.25299	5.0227	5.00077	4.63013	3.36929	4.68325	4.25503	5.74328	3.82969	4.55601	3.54714	6.60169	4.97434	5.13653	3.93972	3.51329	4.71804	6.25774	4.25161	5.57524	4.57624		59.48	22.2099	66.7266	125.734	18.9393	55.7779	18.6707	14.4756	28.0747	19.9055	26.2861	60.9678	40.9285	11.6046
10.5	4.64746	5.96993	4.03688	5.25008	5.82045	4.54664	5.52707	3.33702	4.7953	4.56772	6.23353	4.89978	4.26526	5.21305	5.37234	5.02085	4.83356	3.22891	4.40879	4.4011	5.42895	4.15921	4.44461	3.91321	6.76891	5.29317	5.00133	3.60963	3.40255	4.96886	6.20893	4.40043	5.7186	4.49366		56.3763	22.872	69.7005	127.534	21.2269	63.2169	21.3946	15.447	33.8416	10.6267	25.6511	75.5942	27.0539	26.8683
11	4.33203	5.74578	4.25979	5.06979	5.66241	4.30285	5.87022	3.42419	4.61307	4.35881	6.55438	5.30301	4.13301	5.25086	5.55068	4.68903	4.85306	3.61482	4.38994	4.30373	5.72722	4.53155	4.57404	3.77528	6.94309	4.92946	5.28121	3.79878	3.50515	5.17001	6.31492	8.74451765106109*	5.86038	4.33419		53.4281	20.1079	67.5775	129.686	20.8558	84.9482	25.7217	22.9333	32.8304	26.4996	23.1353	58.7682	35.8104	9.17457
11.5	10.5506916872541*	5.78855	4.50302	5.06079	6.18677	4.08939	5.1776	3.68829	4.67128	4.31113	7.42524	5.12051	4.16871	5.3171	5.37492	4.8749	8.8723324222114*	3.85173	4.39974	4.41277	5.78648	3.74065	4.25958	3.85366	6.72001	5.54601	5.21707	3.69795	3.38257	5.04945	6.04295	7.45170492884554*	5.78833	4.29393		28.6285	9.19656	65.5139	133.173	15.1246	83.6548	24.2799	32.4384	14.2444	25.3317	16.4102	53.1124	33.997	13.5683
12	4.25812	5.75375	4.67009	5.14251	5.95891	4.31775	5.18266	3.6432	4.82926	4.13693	7.65108	5.20573	4.0703	5.45584	5.43791	4.70675	7.74290634970117*	3.44125	4.44997	4.44113	5.73337	3.47866	4.29461	3.81458	6.63545	5.30147	5.44436	3.81192	3.69442	5.04693	6.33266	5.70676	5.66426	4.20604		76.4634	12.7013	62.7868	133.711	7.7013	63.6349	34.2724	27.6687	26.7249	19.3557	24.6352	49.3561	23.5192	53.9543
12.5	4.1892	5.4187	4.50262	4.76566	6.18167	4.33032	5.37783	3.62763	4.70748	4.60085	7.81154	5.42182	3.97974	5.29767	5.35319	5.00498	7.15179947097137*	3.62843	4.30012	4.02965	5.82072	3.48221	4.25766	3.95505	6.02497	5.7459	5.37132	3.88288	3.7301	5.1463	6.06619	4.05314	5.784	4.20258		65.0411	13.5743	64.6169	120.898	14.2833	58.7152	23.7129	29.2929	32.4402	29.418	16.2957	57.6061	52.7757	28.3475
13	4.16738	5.85011	4.84504	4.78818	6.14401	4.19721	5.4676	3.62428	4.65605	4.45965	8.43316	5.15322	4.19501	5.23547	5.18181	4.62946	5.03924	3.62794	4.63785	4.37178	6.0426	3.58469	4.54044	4.10672	6.13841	5.75846	5.28985	3.64977	3.7774	5.49764	6.11874	4.30596	5.65798	4.2868		61.9749	11.0892	63.3842	118.428	24.7365	62.1566	28.4509	47.7209	19.8574	17.5148	19.1394	59.1629	23.7055	39.7094
13.5	4.54465	6.23847	5.50401	4.50689	6.24912	4.51431	5.58797	3.39228	4.79238	4.53491	8.32338	5.19533	4.32548	5.05541	5.34424	4.66318	4.83803	3.76705	4.69746	4.54591	6.32047	4.19482	4.25661	4.11208	5.5767	6.30671	5.69722	3.84809	3.73818	5.06516	6.17004	4.11905	5.79849	4.35507		43.8193	14.9015	59.2397	129.73	29.4761	78.6266	18.8559	38.7395	11.093	31.7516	37.7092	56.9692	45.0731	34.8224
14	4.32872	6.22008	5.64714	5.18317	5.88052	4.17392	5.48374	3.68169	4.49091	4.70676	9.46054	5.3201	4.22735	5.03759	5.38507	4.61069	5.50689	3.66617	4.8369	4.61153	6.47152	4.41498	4.52412	4.10552	5.58443	5.72789	5.59509	3.75223	3.85007	4.82618	6.24166	3.88728	6.0031	4.80422		50.4204	18.4584	56.4475	131.514	19.7409	59.4016	51.9759	38.3367	24.3275	15.709	13.7488	50.1388	50.5833	22.0695
14.5	4.16126	6.09393	5.9958	5.23583	6.13602	4.18602	5.30211	3.65953	4.68875	5.2854	10.2179	5.11726	4.43066	4.95802	5.07715	4.27755	5.19911	3.6254	4.47603	4.69605	6.04086	4.32063	4.42112	3.92149	6.15496	5.58792	5.73943	3.99228	4.0933	4.7115	6.09331	4.12454	6.22436	4.93578		54.5821	24.569	53.0663	134.575	8.37826	61.7724	45.4207	44.1063	12.9627	28.024	13.1732	33.5058	57.6879	19.4479
15	4.02293	10.367438410314*	6.12256	5.81366	5.88007	4.13261	5.13854	3.69423	4.56755	4.7991	8.95696	5.04141	4.46556	5.19154	5.35675	4.5099	5.42859	3.61514	4.67414	4.64364	6.05119	4.55237	4.24564	3.98521	5.31334	5.67754	6.03405	3.61584	4.1811	4.82273	6.18697	4.46929	6.12615	5.32534		55.4525	16.1062	56.0912	129.695	5.14986	51.9741	26.6658	35.5958	25.075	26.0144	18.3096	51.9008	48.776	18.0331
15.5	3.91226	10.9096523135513*	6.93987	7.8686194341923*	6.15758	4.27217	5.50839	6.79497678231207*	4.73227	5.02937	9.65303	5.33718	4.39543	5.37537	5.59118	4.18027	5.00605	3.71379	4.59121	4.47126	6.11279	4.25353	4.23534	4.08534	4.93256	5.80168	5.58555	3.57191	4.16069	4.73279	6.1111	4.67094	6.09287	4.93022		51.8018	14.694	48.5479	86.8042	4.6959	88.0282	22.201	27.83	20.3256	21.6458	28.4178	44.5797	10.1656	14.2385
16	4.20483	12.0726711202765*	6.79755	7.59078330619166*	6.13642	4.52847	5.59396	6.63319688267349*	4.71272	5.00176	9.99807	5.47527	4.28162	5.17668	5.36323	4.2458	4.94501	3.83879	4.83697	4.5543	6.41646	4.47466	4.40558	3.71479	4.85432	5.73371	5.73952	3.73389	3.94267	5.05877	6.26976	4.7346	6.04699	5.05675		46.8501	26.2333	50.5618	89.4562	2.34892	97.9369	7.43808	24.5967	30.7874	33.6351	21.3546	47.9345	26.5834	18.9297
16.5	4.18509	10.3915209127459*	6.7989	7.35845425680058*	6.23674	4.10779	5.99655	6.81082030006787*	4.54506	5.18067	9.20662	5.27533	4.71318	5.25824	5.45171	4.50962	4.91964	3.76809	4.72679	4.32449	6.19938	4.36186	4.45677	3.9277	4.55924	6.61162	5.63974	3.66666	4.15964	5.02556	6.38753	4.95397	6.36425	4.76125		55.5529	30.7254	50.6408	14.6798	3.3891	83.1808	28.8004	27.855	31.3951	45.3417	17.8374	49.6858	15.6423	36.5988
17	4.48411	11.7919453682593*	6.78007	7.82297112982673*	6.10499	3.96003	5.58577	6.81830034765045*	4.6425	4.96609	8.34882	5.12003	4.56337	5.14124	5.29859	4.57702	4.91156	4.24818	4.75501	4.25727	6.15432	3.89729	4.6299	4.18782	4.27925	7.39734	5.69212	3.79984	4.27149	4.77584	6.27653	4.99305	6.54962	4.73077		44.3661	30.2394	49.817	22.4036	3.71145	86.2279	24.7441	27.3242	28.3263	44.2573	15.5627	55.8067	15.3233	24.9208
17.5	5.35396	9.82643	7.22591	6.86702	6.12847	4.16328	5.51043	7.06778454571719*	4.53251	5.02117	7.26721	5.22024	4.6959	5.20427	5.38619	4.56042	5.28804	3.58794	4.7584	4.55459	6.3989	3.86546	4.75466	3.98777	4.52858	6.52009	5.99512	3.76697	3.87149	5.06309	10.4665745835822*	5.13886	6.81026	4.64936		37.573	36.5477	49.7371	30.3799	20.4598	72.5331	33.4306	28.5346	29.475	46.4515	1.97133	30.9463	29.5638	25.328
18	4.35703	10.6800776452871*	7.21495	6.4029	5.63747	4.18331	5.30663	6.96554351707966*	4.68877	5.07476	7.82311	5.09695	4.72859	5.35268	5.34847	4.63382	4.96813	3.6663	4.42354	4.62167	6.04132	3.92941	4.92303	4.32311	4.20566	6.56143	5.97344	3.88958	4.14326	5.20072	6.45647	4.40103	6.8056	8.15047439741813*		37.4553	33.4288	48.6679	18.8635	24.5934	50.2179	33.8025	31.3215	12.1283	55.9187	14.6422	53.3095	22.0522	40.9925
18.5	4.40073	10.933756382522*	7.271	6.5524	5.91046	3.96695	5.3163	3.78081	4.76062	5.28108	7.28609	5.10286	4.84863	4.98443	5.24773	4.75283	4.7969	3.65682	4.62446	4.45438	6.09323	4.07055	4.81824	3.82793	4.32586	5.80548	5.60908	3.84628	4.09011	5.31909	6.53058	4.32673	6.86385	4.60844		36.5265	37.2025	47.5436	19.6471	25.3625	49.1747	41.2782	58.0567	10.7615	30.3745	9.50716	45.3315	18.6108	27.0171
19	4.61021	10.6174465370215*	7.70507	5.91965	6.55844	3.78694	5.25412	3.71335	4.86819	5.04801	7.1401	5.07505	4.69334	4.95489	5.1022	4.61192	4.98769	3.94046	4.69537	4.7647	5.94915	4.06554	4.86059	4.06847	4.43051	5.58469	5.67498	4.13	3.91645	4.92539	6.47094	4.44964	6.54197	4.61075		39.2192	43.1546	44.4168	13.3178	9.27682	63.8635	48.8218	55.1316	5.90832	39.5791	12.5898	45.6712	25.1271	47.2728
19.5	4.52534	9.6233	7.70542	5.72957	6.15721	3.86429	5.20662	3.92205	5.02368	5.13557	7.2312	5.01015	4.54241	5.23046	5.31948	4.93395	5.10522	3.79537	5.10082	4.50849	6.21846	4.01324	4.59603	4.41873	4.74504	5.98027	5.73488	4.00891	4.02717	5.50181	6.60147	4.44365	7.0511	4.83275		33.4631	10.9167	46.8447	18.1219	19.6317	63.396	46.8882	51.9952	29.8198	37.7673	2.45018	26.0847	30.0108	42.9389
20	4.82466	8.93819	7.65073	6.51142	6.22806	3.70075	5.54015	3.79414	5.03929	4.77384	8.32259	5.1133	4.56896	5.34533	5.33148	4.81012	4.74019	3.68132	4.90039	4.48197	6.24161	4.20467	4.74185	4.26056	4.63376	6.07492	5.25692	3.87723	4.23743	5.16871	6.51589	4.51638	6.67452	4.95414		22.3221	4.89149	46.1131	10.5933	32.5055	57.0698	40.2749	44.9696	26.7908	11.5782	18.6662	28.8186	37.9918	15.5193
20.5	4.9557	8.35925	7.5933	6.93767	5.87762	3.88386	5.26541	3.8795	4.78545	10.3003228782133*	8.58972	5.18448	4.48719	5.35889	5.54322	4.70973	4.82206	3.65555	5.38822	4.49936	6.39144	4.42432	4.6007	4.34321	4.59796	6.74244	4.98848	4.00997	4.18497	4.99124	6.384	4.7024	6.84508	4.83025		25.9019	4.60326	47.0115	32.9103	24.0386	57.5311	46.8503	54.2089	10.0096	19.538	17.4857	35.842	27.4845	19.0454
21	4.69539	8.60632	7.78131	6.52002	5.76136	4.13468	5.49015	3.84105	4.94173	4.93347	8.41072	5.42828	4.63434	5.10607	5.37968	4.90756	4.61529	3.61333	5.89778	4.29358	6.50484	4.31423	4.63606	4.76133	4.75722	6.96195	5.0384	3.85335	4.33384	5.11892	6.50753	5.04458	6.32186	4.64098		34.8243	3.27162	45.2838	33.0912	23.2102	58.1952	64.6863	48.9271	8.42185	18.3859	20.5481	28.9116	15.1698	32.3002
21.5	4.95697	7.46221	7.93886	5.86044	5.4884	4.56886	8.69065854780494*	4.74967	4.73214	5.16186	8.47588	5.04473	4.94713	5.03776	5.44146	4.66766	4.69973	3.62632	6.11054	4.56251	7.02313	4.37658	4.7257	4.59117	4.81057	6.60976	5.22921	3.932	4.53423	5.31434	6.41724	5.26722	7.17917	4.78999		27.8682	11.2534	45.4906	45.3676	25.0194	45.6351	43.7062	40.6815	25.9511	30.5147	15.8106	67.0321	32.0937	32.8008
22	4.88601	6.86028	8.72615	5.77926	5.89325	4.54272	8.16133942204937*	3.60953	4.85713	5.08055	7.78062	5.00756	4.93058	5.15562	5.56248	5.05723	4.94714	3.71527	6.09595	4.70011	6.26822	4.15401	5.04498	4.96319	4.70621	6.65026	5.27546	4.11802	4.48789	5.56433	6.43562	4.60121	6.91113	4.9598		47.262	13.5351	44.3378	46.9768	12.2168	39.6641	44.9721	54.3868	31.7666	24.3361	10.4913	28.4572	49.1721	11.3428
22.5	4.80603	7.38894	8.60311	6.77255	5.9073	4.75143	8.02733869442295*	3.49493	4.91485	5.38955	7.44482	5.19619	4.39962	5.27874	5.55656	4.95436	5.13054	4.04359	5.53036	5.05323	6.54942	4.30888	5.32388	5.12951	4.76716	7.06898	5.69146	4.26069	4.60968	5.42162	6.32853	4.41742	7.07005	4.97584		45.0503	23.876	42.0762	24.9674	8.26886	34.8872	44.8395	55.5183	8.52167	24.4921	8.60221	46.0614	50.654	13.6242
23	8.28899502413692*	8.05922	9.04616	6.46339	5.59953	4.33292	8.1304020415011*	3.63878	5.21481	5.23435	7.81047	5.04947	4.79602	5.05714	5.19637	4.9208	5.08035	3.31907	5.27261	5.16503	6.3404	4.27094	5.05891	5.15311	4.68716	7.46744	5.67361	4.26148	4.55687	5.07999	6.39334	5.01823	7.57116	4.93761		22.1748	28.6877	42.5344	36.8657	11.8836	56.2452	26.9612	57.064	15.0568	19.9096	15.913	56.3743	43.4972	49.0845
23.5	4.80162	8.13435	9.31436	6.77981	6.04586	4.30611	7.90202115850639*	3.78157	5.12377	5.39624	8.88981	4.94769	4.72675	5.33894	5.50805	4.97589	4.67525	3.54784	5.73839	5.37742	6.37695	4.3951	4.86937	5.02949	4.76406	7.4545	5.74661	4.38182	4.37457	4.76935	6.31739	5.61894	7.59531	4.81675		36.0885	28.5642	42.0167	21.0673	5.00735	53.1965	41.8031	55.0168	2.51418	20.0912	16.7469	34.9574	43.9772	52.4372
24	4.82562	7.82259	8.94074	6.61225	5.94753	4.68818	7.12255	3.67046	5.06101	5.06849	8.39215	5.25227	4.7241	5.1092	5.29465	5.28887	5.0072	3.60676	5.86064	5.12506	6.97578	4.35692	4.80105	5.03336	4.68709	6.74061	5.53291	4.02177	4.30916	5.05131	6.3602	6.11341	7.83776	4.75404		45.6498	33.1074	41.5005	20.5182	42.444	40.9735	43.94	38.1561	1.94332	23.0785	11.4029	38.4931	75.7939	56.7201
24.5	5.09083	7.94813	8.93677	6.79795	6.13037	5.00257	6.58661	3.4528	5.05934	5.09555	8.33026	5.3269	4.73739	5.09667	5.37185	5.47852	5.18656	3.61594	5.79489	5.02981	6.49935	4.28464	5.23748	4.91371	4.63682	6.41347	5.6755	4.09291	4.25154	5.10245	6.13807	6.37796	8.24247	4.90438		48.8808	47.7441	41.3042	6.42196	32.2259	37.0651	44.1405	37.8577	13.3001	40.4643	9.19372	51.4609	58.7651	49.8813
25	10.6569140107232*	8.17378	9.28771	7.00465	5.99541	4.89689	5.71893	3.59855	5.18772	5.39397	7.74234	5.37324	4.79871	5.1371	5.50343	4.98354	4.92014	3.39815	5.89119	5.33527	6.78125	4.45389	5.14801	5.09104	4.46728	7.12449	5.41194	4.06123	4.54064	5.34058	6.07095	6.39416	7.89421	4.81935		14.9127	25.0577	41.3699	34.2705	44.7705	36.1148	42.2478	29.9892	21.8337	16.2327	18.6609	33.6783	32.2004	27.016
25.5	10.5605199060803*	8.20889	9.42443	7.00525	6.17693	4.68926	6.06064	3.82205	4.88803	5.26458	7.84136	5.52497	4.82644	5.28359	5.4922	5.1227	5.01606	3.60586	5.82726	5.76935	6.28447	4.68111	5.16213	4.80394	4.56327	7.39611	5.41713	4.14375	4.62825	5.66677	6.3408	6.61624	7.83818	4.78493		18.3752	19.8408	38.318	10.7363	32.7085	44.154	35.9185	29.479	18.0138	27.8893	16.2628	25.302	63.2622	6.14539
26	4.84212	8.40181	9.81459	7.37799	5.9659	4.72597	6.99231	3.88705	4.86905	5.17422	7.53216	5.33647	4.96569	5.41101	5.5014	5.34953	5.20694	3.8924	5.98368	5.29638	6.22311	4.4945	5.32924	4.99487	4.41954	7.08246	5.49646	3.80322	4.73259	5.8896	5.99802	6.58929	8.04777	4.83745		32.3459	12.4947	38.3725	28.4944	34.5902	30.2147	32.1492	30.4954	17.3512	31.2712	21.3092	69.9145	9.54915	39.7543
26.5	4.80157	8.34599	9.60529	7.68967	5.93504	4.73045	6.68617	3.72813	4.87115	5.16376	7.28894	5.27982	4.71118	5.40027	5.42503	5.52583	5.09319	3.58082	6.89576	5.51529	6.73253	4.96221	5.36941	5.13726	4.62442	6.40197	5.72679	4.10081	4.23523	5.64238	6.19533	6.76454	7.95736	4.84694		33.0457	3.6626	39.4525	33.8622	28.5677	39.0088	48.0181	43.6221	22.7011	25.4006	15.6649	58.5173	53.8166	18.7501
27	4.66136	8.44386	10.4898	6.93777	5.87111	4.77406	5.97704	3.31028	5.08935	5.04776	7.51255	5.45529	4.76437	5.6963	5.67217	5.19676	5.34534	3.75224	6.7715	5.36032	6.38528	5.12544	5.26222	4.8367	4.50145	6.44006	5.53411	3.93997	4.14273	5.671	6.35825	6.68986	7.34896	4.84591		36.4496	3.8512	38.075	24.4235	28.2229	35.6031	56.5341	37.2484	10.6107	20.2628	12.6076	52.2274	37.2745	25.1329
27.5	4.93196	8.40545	10.5471	7.54721	6.08765	4.96962	6.3876	3.57611	5.07226	5.24205	7.94346	5.39499	4.84073	5.46153	5.52824	5.65242	5.41711	3.95025	6.87148	4.89373	6.55924	4.65276	5.45831	4.90458	4.5642	7.29388	5.5659	4.17316	4.20624	5.80726	6.27011	6.85202	8.16504	4.70097		43.9891	3.59794	37.0837	11.9181	27.2273	55.4411	59.58	28.1357	10.5074	15.2143	17.865	20.4042	54.8329	33.4306
28	4.87756	8.73939	10.6288	7.72489	6.12626	4.9587	5.88171	3.74544	4.97843	5.14422	7.73489	5.34754	4.82307	5.30647	5.50483	5.379	5.33199	3.95495	7.37111	4.93782	6.67057	4.4632	5.74312	5.05535	4.50496	6.81105	5.2163	4.58179	4.52356	5.42232	6.26091	6.69145	8.31842	4.81116		48.2804	4.45849	37.9126	5.36121	17.3052	35.025	52.1158	17.7838	20.4066	13.5616	32.8919	52.3712	50.2654	48.9791
28.5	4.88458	8.78683	10.2773	7.98284	6.17652	4.69648	5.91561	4.03217	4.86737	5.08887	8.53579	5.07636	4.93031	5.14685	5.55019	5.39538	5.28799	4.2527	7.10417	4.87628	6.77264	4.38354	5.43611	5.07381	4.54503	6.7212	5.64642	4.20134	4.05455	5.38094	6.26064	6.54257	8.37573	4.77147		22.1989	12.6206	39.0197	13.2744	29.5497	34.9098	71.8676	34.178	21.0815	21.6274	26.2408	47.2865	27.7329	27.6076
29	4.65518	8.64288	9.98797	8.13953	6.06075	4.9425	5.78591	3.83925	4.69781	4.95722	7.59582	5.43614	5.12512	5.16517	5.39232	5.67148	5.23138	3.97466	7.3344	4.75922	6.37522	4.21354	5.51051	5.21093	4.74407	6.68634	5.53506	4.29212	4.23006	5.69878	5.97826	6.68689	8.56431	4.83202		29.0481	12.3303	39.7695	11.2437	19.9924	33.9328	79.8694	26.6439	12.2902	23.8852	10.6865	60.8631	49.716	17.3091
29.5	4.82453	8.52792	10.1193	8.29886	6.40512	5.09835	5.87048	4.25147	4.98626	5.08055	7.8362	5.18526	5.02968	5.12646	5.26406	5.45096	5.31524	3.99153	7.10184	4.68478	6.68471	3.938	5.78469	5.31661	4.79149	7.1408	5.53936	4.1448	4.49648	5.69739	6.23879	6.79089	9.11579	4.80191		29.5878	5.016	38.0252	10.3245	17.6719	38.2653	75.8842	20.8609	9.25143	8.685	52.9568	45.5964	36.6692	4.6904
30	4.87805	8.76875	9.96573	8.02938	6.45766	5.136	5.95444	4.23092	4.84686	5.30588	7.83919	5.33827	4.7353	5.27076	5.44331	5.67644	5.22262	4.14826	6.67784	4.92287	6.98993	4.20061	5.4457	5.41201	4.73631	6.75882	5.49201	4.16791	4.44884	5.6483	6.32167	6.99417	9.5096	4.77396		30.1824	19.2993	40.8855	23.2849	21.2298	35.456	24.2742	32.1302	28.001	17.1567	25.7166	48.1505	41.5652	17.8313
[truncated: 20 more columns]

## Sheet: 3D Characteristic times Nuc
Characteristic times of nucleus polarization (in minutes)
Time angle<45	Time of Last local minima of nucleus-droplet distance
9.5	15.5
0.5	7
1.5	7.5
17	22
0.5	21.5
22.5	20
4.5	19.5
1.5	10.5
8.5	17.5
0.5	12
8	19.5
15.5	22
0.5	12.5
0.5	19
18	19
6	16
0.5	10
0.5	9.5
0.5	18.5
0.5	17
0.5	6.5
8	12.5
19.5	15.5
14	8.5
8	18
5	11
5	21
2.5	7.5
0.5	19.5
27.5	24
0.5	9
5.5	7
4.5	8.5
7.5	12.5
