# Supplementary material for: Microtubules restrict F-actin polymerization to the immune synapse via GEF-H1 to maintain polarity in lymphocytes
Source: eLife journal article supplement (doi:10.7554/elife.78330), 2022-09-16
Supplement: supp [file Figure4-FigureSupplement1A.xlsx]

## Sheet: Sheet 1
Antigen Recruitment Plateau (Average 25-30 min)
DMSO	pnBlebb	MLSA1
1.78955	1.46179	1.8732
2.17264	1.6422	1.82086
2.01244	2.73781	1.60292
1.81024	1.50059	2.32359
1.75696	1.31014	1.55351
2.2049	1.68954	1.7554
2.20664	1.60798	1.61129
1.82399	1.24081	1.98997
1.57045	2.99725	1.34492
2.15809	0.914344	0.913155
3.99655	2.39391	1.60377
2.58848	2.09034	1.34572
1.65062	1.13017	1.61023
2.05556	1.53233
1.49305	2.26577
1.69107	1.41311
1.26916	1.5439
1.63403	1.15972
1.94484	3.05072
1.82697	2.34873
1.19567
2.03429
