# Supplementary material for: Microtubules restrict F-actin polymerization to the immune synapse via GEF-H1 to maintain polarity in lymphocytes
Source: eLife journal article supplement (doi:10.7554/elife.78330), 2022-09-16
Supplement: supp [file Figure4-FigureSupplement1B_C.xlsx]

## Sheet: DAG Peak
Peak of Enrichment of DAG reporter in 0-20min (on smoothed data)
DMSO	Blebb	MLSA1
2.05406	2.35502	1.51796
9.34523	3.27521	2.04606
1.6163	2.59737	2.83469
0.767286	2.48455	2.40973
1.45771	1.15208	3.81459
7.69462	0.858833	4.25903
1.41809	2.79789	1.6507
1.27667	1.35233	1.64312
2.56245	1.42324	1.03154
2.49363	1.50448	1.80952
	4.01071	1.55873
	3.14354
	2.97292

## Sheet: DAG Final State
Avg Enrichment of DAG reporter in 25-30min
DMSO	Blebb	MLSA1
1.40803	1.87945	1.08176
2.52185	1.11592	1.25373
0.899802	1.5489	2.47376
0.702118	1.25852	0.994663
0.922143	0.862626	1.23972
2.08906	0.685346	1.60475
1.00077	3.48304	1.18846
1.00275	1.8529	1.54469
1.13299	1.00389	0.752628
1.81048	1.09252	1.77565
	1.03831	0.791777
	1.81569
	2.27354
