# Supplementary material for: Microtubules restrict F-actin polymerization to the immune synapse via GEF-H1 to maintain polarity in lymphocytes
Source: eLife journal article supplement (doi:10.7554/elife.78330), 2022-09-16
Supplement: supp [file Figure4A.xlsx]

## Sheet: Sheet 1
Plateau Antigen Recruitment 25-30 min
DMSO	LatA 2uM
1.86091	1.75816
2.12594	1.23317
2.29208	1.96485
1.39101	1.2906
2.01338	1.41489
2.68043	2.21847
1.38258	1.16708
1.96914	1.51804
2.20342	0.945542
2.16789	1.04659
2.91662	0.908495
1.53533	1.23009
1.36165	2.02782
1.74458	1.25565
1.81727	1.71452
0.815536	1.21661
1.37149	1.66525
	2.38613
	0.930441
	1.74306
	1.37145
	2.07611
	1.23832
	1.28644
