# Supplementary material for: Microtubules restrict F-actin polymerization to the immune synapse via GEF-H1 to maintain polarity in lymphocytes
Source: eLife journal article supplement (doi:10.7554/elife.78330), 2022-09-16
Supplement: supp [file Figure4B.xlsx]

## Sheet: Sheet 1
Peak of DAG reporter enrichment (0-10min), on smoothed data
DMSO	LatA
1.90557	1
5.74792	0.92635
2.11955	1
4.16	1
9.09375	2.02942
1.02497
4.63438	2.33422
2.86442	1.72797
3.35472	1
3.46166	2.71542
