# Supplementary material for: Microtubules restrict F-actin polymerization to the immune synapse via GEF-H1 to maintain polarity in lymphocytes
Source: eLife journal article supplement (doi:10.7554/elife.78330), 2022-09-16
Supplement: supp [file Figure4C.xlsx]

## Sheet: Sheet 1
Single curves of centrosome and nucleus orientation
	DMSO	DMSO		LatA	LatA
Time (min)	Centrosome	Nucleus		Centrosome	Nucleus
0	142.733	129.647		131.703	112.998
0.5	141.783	132.788		123.413	112.093
1	125.738	124.721		132.617	135.546
1.5	121.445	120.055		117.434	117.596
2	111.881	100.794		15.2118	45.8649
2.5	106.912	98.0009		18.0012	54.6827
3	107.339	91.3422		42.1238	32.676
3.5	82.0411	70.3465		45.0637	52.0081
4	77.5136	74.9858		32.5769	59.2559
4.5	80.4081	62.7399		43.6827	12.0251
5	74.786	69.4442		36.7521	29.9167
5.5	72.7582	68.3882		41.7611	17.559
6	47.8383	47.3725		35.263	21.943
6.5	35.5863	49.0399		19.2977	31.6032
7	43.2074	52.0365		30.0531	32.3797
7.5	44.3789	49.7872		27.6192	16.7899
8	40.7374	41.7512		28.3288	23.5471
8.5	28.5299	27.0477		26.8192	30.8178
9	30.9838	50.9828		28.0839	5.66011
9.5	27.8488	29.7034		19.9557	10.5756
10	17.1385	28.0747		27.7052	12.0466
10.5	16.1157	33.8416		25.797	19.8155
11	18.664	32.8304		30.5443	15.2579
11.5	13.0226	14.2444		29.3204	20.5241
12	16.1789	26.7249		23.8968	11.3278
12.5	14.6761	32.4402		28.1937	9.17585
13	17.5079	19.8574		27.9381	17.4159
13.5	17.3153	11.093		23.4185	4.39677
14	20.009	24.3275		33.013	18.7118
14.5	9.35216	12.9627		25.9205	13.226
15	16.5863	25.075		26.686	15.6797
15.5	13.8015	20.3256		28.8751	23.8893
16	17.7786	30.7874		23.9754	27.1629
16.5	11.1126	31.3951		24.3554	22.4961
17	9.40035	28.3263		22.7059	17.6582
17.5	12.0488	29.475		20.2729	21.2923
18	15.1468	12.1283		29.3305	24.8575
18.5	9.1129	10.7615		28.4129	18.4996
19	5.40249	5.90832		28.0048	29.5813
19.5	12.0454	29.8198		33.2901	15.4191
20	6.61301	26.7908		34.3455	25.4417
20.5	4.71711	10.0096		44.4457	29.4327
21	6.42808	8.42185		36.3519	10.1755
21.5	5.16975	25.9511		36.9832	13.7274
22	6.43528	31.7666		28.8152	11.4475
22.5	11.4303	8.52167		31.0986	22.2463
23	18.9718	15.0568		33.7288	16.9141
23.5	13.1807	2.51418		44.2303	27.3728
24	4.54483	1.94332		39.2321	26.4784
24.5	13.2518	13.3001		39.5896	31.327
25	14.0838	21.8337		37.9534	26.417
25.5	7.26693	18.0138		38.9874	29.8523
26	4.87953	17.3512		28.192	26.4967
26.5	4.50884	22.7011		33.248	27.0039
27	15.1868	10.6107		18.5202	34.9331
27.5	4.59457	10.5074		28.8922	44.5565
28	8.60315	20.4066		24.5881	35.4956
28.5	11.2992	21.0815		32.3888	38.4079
29	12.6754	12.2902		31.8133	26.5021
29.5	4.00573	9.25143		22.1626	34.8375
30	13.1859	28.001		30.6455	33.5314
30.5	13.0667	8.27872		49.7013	22.829
31	7.60616	13.2625		42.0928	17.2674
31.5	18.9184	24.4226		41.8263	44.9391
32	28.1023	21.3627		41.8282	30.8688
32.5	7.67704	18.1245		38.7212	24.0519
33	5.03071	13.749		31.4349	28.5678
33.5	11.7768	9.84904		33.2254	41.0234
34	33.9772	11.3957		35.6212	52.7298
34.5	26.3663	18.5675		31.4808	54.1708
35	22.9051	21.81		29.5207	48.8089
35.5	24.9353	27.5554		43.1491	40.5106
36	6.05972	8.16007		35.2421	40.1357
36.5	27.0409	18.6232		31.2233	47.6034
37	9.97529	26.609		32.2264	43.3148
37.5	14.3401	28.0322		33.2285	52.5603
38	13.1498	21.4656		29.0799	40.0826
38.5	121.797630190563*	25.5601		25.8142	35.8632
39	22.1943			121.387361884727*	42.2324
39.5	132.611340070755*
40
