# Supplementary material for: Microtubules restrict F-actin polymerization to the immune synapse via GEF-H1 to maintain polarity in lymphocytes
Source: eLife journal article supplement (doi:10.7554/elife.78330), 2022-09-16
Supplement: supp [file Figure4D.xlsx]

## Sheet: Sheet 1
Nucleus-droplet distance (µm)
Time (min)	DMSO																		LatA
0	4.08454	3.44307	5.73565	4.32395	3.54376	4.8073	4.70254	4.19134	4.70272	4.44806	4.08024	4.61041	3.98152	3.14975	4.29162	4.22203	3.31507		2.34002	2.68339	2.43109	3.59227	6.45707	1.47816	4.35908	5.45032	3.69767	4.55013	2.92865	1.65658	4.76963	4.44985	2.72255	2.1143	3.62858	3.05801	3.66717	3.50013	3.6047	2.75174	4.15686	3.10775	5.18521	1.75838	2.61632	2.05265	2.77186	1.87688	2.92948
0.5	4.37563	3.77944	6.16248	5.17498	3.3625	5.19888	4.85355	5.09375	5.20149	5.22193	4.40063	4.56754	3.86756	2.92468	4.47425	5.23905	3.46006		2.7331	1.75408	2.03676	2.96587	6.24193	1.96613	2.26826	5.49965	5.30874	4.3111	3.72763	1.82737	4.32629	4.43688	11.273331158678*	2.34189	4.13941	4.15696	3.03609	3.1922	3.81174	3.09926	4.12247	4.76804	6.24963	1.81071	2.97276	1.66212	4.71628	2.46709	3.03236
1	4.5851	4.05366	5.98919	10.0183139716852*	3.69328	5.115	4.83297	5.35592	5.43165	5.2212	4.18097	5.51826	3.97763	3.46489	4.24169	5.2688	3.73419		3.84352	2.89541	3.50412	3.3977	5.71402	2.05192	2.97608	5.41477	5.25796	4.61343	4.90163	2.32285	4.78567	5.45933	9.40988050110104*	2.419	4.5968	4.26316	3.05578	3.76326	3.51382	5.26709	4.32059	4.16097	6.27879	3.05629	2.79635	1.64125	5.17447	2.70361	4.35244
1.5	4.72809	3.86811	5.3834	9.97525148802771*	3.86447	5.31926	4.80134	5.31529	5.08017	5.05129	3.84923	4.94956	4.01079	3.70568	4.34224	5.20226	4.07572		3.2373	2.53844	3.09231	4.72625	5.89868	2.16081	3.60587	6.74407	4.92451	5.03778	3.2416	2.51495	3.45818	5.6614	2.65623	3.54902	4.27694	3.96178	3.84284	4.48761	4.80747	5.88782	5.59244	3.76809	6.30326	3.62631	5.30726	2.07843	5.31467	2.66626	4.8797
2	4.78434	3.55737	5.31031	10.2078349167392*	3.81621	5.04901	4.75713	5.07826	4.82097	5.01193	3.58058	5.26943	4.09459	3.86386	4.25589	5.52973	4.03184		3.26618	2.92746	2.67425	5.03479	5.59665	2.19637	3.81202	6.55472	4.87302	5.76292	2.9936	2.88743	3.40891	5.65148	4.364	3.38845	4.60777	3.41413	5.03846	5.55989	4.7306	17.0994	5.50904	4.49752	6.14222	4.7184	5.11695	3.20699	5.79614	2.63855	4.35209
2.5	4.30738	3.56667	5.22748	4.61698	3.92605	4.81164	5.25001	5.07259	4.85187	4.7014	3.54907	5.00049	4.29791	3.94752	4.20111	5.68411	4.10495		3.40113	3.17173	2.74233	4.88079	5.6454	2.37935	4.46369	6.27031	5.10498	6.7117	3.30037	2.93136	3.90916	5.43633	5.16023	4.3066	5.08887	3.61381	5.28082	6.32641	4.69112	4.58107	5.33646	3.06201	6.04561	5.44704	5.07327	4.57008	5.27213	2.86693	4.95085
3	4.23765	3.53832	5.26174	4.81863	3.89235	4.88134	4.92311	5.22723	4.81764	4.60679	3.51371	4.72078	4.48099	4.05094	3.93326	5.7333	4.33575		3.51694	3.15173	3.01901	5.69039	5.82533	2.25666	4.63601	6.23623	5.45727	7.48996	4.23406	2.72924	3.71983	5.62001	4.63308	4.42575	4.69398	3.67196	5.00117	5.50297	5.19345	4.63876	5.44869	3.64162	6.13362	6.0993	4.58541	4.23672	5.12575	2.79506	4.30811
3.5	4.57097	3.54988	5.1654	4.59629	3.79555	4.62301	5.20166	4.71933	4.91328	4.66184	3.56721	4.90251	4.77161	4.38397	4.24557	5.63795	4.34621		3.41343	3.17709	3.02235	5.70989	5.38896	2.22536	4.19223	6.64744	5.65246	6.93137	3.9523	2.33367	4.11074	6.02752	3.93677	3.9868	4.97423	4.08375	4.62798	5.64776	5.79038	4.63794	5.32746	3.66327	6.65426	5.23932	4.61726	3.95305	5.16997	2.63749	4.9255
4	4.5259	3.23482	5.06138	4.58922	3.80086	4.11479	5.24502	4.37642	5.04182	4.40319	3.47823	4.88872	4.57269	4.19517	4.35313	5.25096	4.57831		3.79435	2.63608	3.11058	5.36015	5.43099	2.1465	4.03137	6.60827	5.50439	6.48786	4.61282	2.29119	3.44106	6.03855	4.43405	4.92018	4.93995	3.56254	4.31818	5.39211	5.58517	4.23619	5.10992	3.88685	6.24112	5.39758	4.77913	4.89887	5.24501	2.43538	5.45892
4.5	4.64501	3.12873	5.02805	4.45715	3.90818	4.41784	5.52431	4.42088	5.06902	4.22476	3.56294	9.94932315267545*	4.73009	4.19157	4.05951	5.32371	4.39878		3.474	2.65292	3.95948	5.43544	5.91596	2.43701	4.01742	6.43326	5.51969	5.98579	4.78865	2.73452	3.84587	6.19711	3.79221	4.65727	5.08027	3.14998	4.19742	6.0276	6.85062	3.93712	4.98783	4.15913	5.58674	5.36887	4.46527	4.88569	4.9221	2.40071	5.6207
5	4.42142	2.75575	4.87885	4.44259	3.84664	4.22121	5.16021	4.48077	5.12722	3.85426	3.72867	4.9843	4.5719	4.02905	4.33966	5.07155	4.55783		3.68898	2.6647	3.44134	5.89399	5.60766	2.0968	3.99126	6.60334	5.70531	6.13573	4.7375	2.59166	3.48503	5.87515	4.24663	5.36604	4.59687	3.55627	3.98979	5.9042	7.12666	4.28255	4.56527	4.05756	6.05703	5.98167	4.71949	5.01446	4.72278	2.6879	6.021
5.5	4.3862	3.20319	4.83216	4.50008	3.76332	4.14517	5.11496	4.40649	5.18194	3.90271	4.00765	4.84737	5.03077	4.52681	4.53109	4.8719	4.63223		3.26582	2.94345	3.59266	5.12316	5.97494	2.16428	3.04849	6.68711	6.18317	5.9096	4.42835	3.0683	3.17054	6.63879	4.20077	4.66536	4.68131	3.91128	4.10759	5.33427	5.95967	4.22661	5.25835	3.68317	5.78363	5.36654	4.73673	5.04334	4.67854	2.51257	5.78684
6	4.54627	3.2781	4.98811	4.02692	3.94266	4.2233	5.14371	4.55149	5.19737	3.58519	3.84355	4.99376	5.26169	4.40383	4.47069	4.69624	4.4994		3.06073	2.64346	3.73948	5.05596	5.68831	2.00844	3.24632	6.57501	6.07531	4.90367	4.40972	2.88088	3.89383	6.6069	4.4647	4.55152	5.04482	4.15143	3.81365	6.40843	5.6832	4.20549	4.99842	3.60334	5.66986	5.74867	4.66987	5.15934	4.69972	2.64974	5.62334
6.5	9.91875498226841*	3.14516	4.56833	4.04511	3.84523	4.55878	5.20167	4.20744	5.27367	3.57422	4.03221	10.1932990056108*	5.36936	4.20983	4.20101	5.17659	4.66383		3.40502	3.15146	3.58964	4.687	5.62673	1.96808	3.32289	6.62566	5.97774	4.78728	4.67752	2.75788	4.87953	6.01251	4.91751	4.40058	4.83914	3.8114	4.19919	5.90663	5.47311	4.05337	5.00998	4.16595	6.77263	5.60066	4.62919	4.99945	4.86327	2.36142	5.67065
7	9.68728259001187*	3.26975	4.54402	8.08610692082136*	3.6102	4.52462	5.30438	4.34972	5.31419	3.61244	3.9867	9.97409927433187*	5.76378	4.50531	4.05786	5.2743	4.58461		2.94996	3.11737	3.64936	5.18757	5.78874	2.56063	3.10951	6.65703	5.53324	4.89442	4.07665	3.08839	5.41152	7.38546	3.35942	5.04645	4.9327	3.94256	4.18559	6.20022	5.37752	3.95367	4.8596	3.78247	6.38148	5.99883	4.5725	5.21644	4.86183	2.07223	5.895
7.5	9.356216062327*	3.37315	4.89511	3.86347	3.76879	4.57883	5.01295	4.49453	5.12374	3.43993	4.17188	4.90396	5.97856	4.37337	4.29601	5.05981	4.71991		3.23585	2.50088	3.40329	4.28431	5.53948	1.98699	3.32473	6.69013	5.90351	5.40878	4.62672	2.8825	7.00931	7.52381	3.99761	4.55819	5.11873	3.54878	4.53431	6.48343	4.22038	3.9897	4.7767	4.43078	6.52428	6.12648	4.39223	4.21087	5.05612	2.41414	5.71387
8	9.68403505266016*	3.68206	4.92593	4.11965	3.54421	4.63997	5.10258	4.25036	5.50262	3.39926	4.4334	4.69577	6.0498	4.57282	4.24885	5.02189	4.38844		3.10422	3.24894	3.49354	5.12153	5.6497	2.84063	3.14611	6.54287	5.91437	5.09498	4.63806	3.2251	3.88094	6.97291	4.40823	5.13168	5.16039	4.06368	4.4456	5.67662	5.2172	3.73885	4.80656	4.38553	5.98108	5.25197	4.56944	4.6012	5.18094	2.42493	5.63221
8.5	4.14649	3.72948	5.2553	4.15693	3.46174	4.94971	4.99601	4.00118	5.82999	3.39614	4.42947	4.66421	6.07583	4.57959	4.11348	5.31616	4.81807		3.41269	3.86688	3.29266	5.00692	5.71513	1.98762	3.26583	6.85886	5.93258	5.85675	5.10255	2.86261	4.02362	6.43274	8.95350343432039*	4.49818	4.85586	3.70066	7.7919518537731*	6.2635	4.54119	3.46388	4.95945	4.92939	6.31791	5.22743	4.37611	4.55441	4.85441	2.98406	5.3189
9	4.45155	4.08611	5.33892	4.28881	3.6477	4.92544	5.24634	4.51449	5.67793	3.36264	4.50857	4.55754	6.10269	4.7199	3.85159	5.34573	5.0172		3.21916	3.49026	3.14176	4.76077	5.82255	1.90948	3.09507	6.55557	5.98925	6.32232	4.32741	2.59695	4.59653	7.0151	4.52516	4.71054	4.36875	4.15453	7.65790239584449*	6.41077	4.58619	3.70329	5.07326	3.4984	6.65289	5.56895	4.26863	4.98041	5.20281	2.55983	5.35006
9.5	11.3946803170378*	4.81942	5.81097	4.47391	3.90748	5.00732	5.2401	4.27283	7.17033	3.51697	4.68124	4.75103	6.3057	4.75758	4.12514	5.46618	4.93658		3.41921	3.64296	3.157	4.91674	5.59965	1.62691	3.36131	6.50726	5.83029	7.14055	4.75269	2.71579	4.18023	7.44685	3.64722	4.32339	4.45457	3.92165	7.60405540484342*	6.67793	4.96189	3.40037	4.87616	4.45634	6.52614	6.13793	4.00887	5.21147	5.12992	2.35541	5.33438
10	4.47869	4.31045	5.99063	4.4186	3.54778	5.4018	5.95314	4.37431	5.78271	3.34928	4.54488	4.61846	6.46229	4.82394	4.53543	5.25299	5.0227		2.92806	3.79007	3.46691	5.02768	5.08313	2.09713	3.61552	6.74502	5.61778	6.47436	6.29541	2.73245	3.95276	7.06103	3.60109	4.09983	4.16885	3.68943	6.96673343468681*	6.25979	13.4685	3.15001	4.49135	3.73489	7.08328	5.45245	4.14631	5.39033	5.44281	2.43001	5.57755
10.5	4.64746	4.22606	5.96993	4.03688	3.56916	5.25008	5.82045	4.54664	5.52707	3.33702	4.7953	4.56772	6.23353	4.89978	4.26526	5.21305	5.37234		2.93625	4.32945	3.57904	5.34759	5.98344	2.26329	3.59481	6.54888	5.37568	5.89827	7.19486	2.89108	3.67304	5.4712	3.38881	4.85474	4.09438	3.88654	7.25601484522189*	5.99519	4.58647	2.7814	4.56872	4.2671	6.78383	5.48518	4.07532	4.79738	5.66289	2.22105	5.52992
11	4.33203	4.60694	5.74578	4.25979	3.63265	5.06979	5.66241	4.30285	5.87022	3.42419	4.61307	4.35881	6.55438	5.30301	4.13301	5.25086	5.55068		3.04125	4.11332	3.76204	5.3197	6.11136	2.42437	3.542	6.72317	6.19058	5.74934	4.33888	3.00527	3.51939	5.79757	4.28211	4.69429	4.42886	4.17207	4.83771	6.1566	4.96384	3.18238	5.43638	3.56784	6.62137	5.79579	4.10403	5.73888	5.36477	2.38936	5.2843
11.5	10.5506916872541*	4.73081	5.78855	4.50302	3.58008	5.06079	6.18677	4.08939	5.1776	3.68829	4.67128	4.31113	7.42524	5.12051	4.16871	5.3171	5.37492		3.23526	3.66742	3.71846	5.26026	5.25152	2.19841	3.38672	7.12865	5.82652	5.81733	4.04392	3.00877	3.48379	5.73298	3.83997	4.49657	4.84124	3.76753	4.41189	5.52451	4.85029	3.18452	4.76312	3.85484	6.43159	5.99376	3.93737	4.64818	5.60083	2.48484	5.11054
12	4.25812	4.50186	5.75375	4.67009	3.55996	5.14251	5.95891	4.31775	5.18266	3.6432	4.82926	4.13693	7.65108	5.20573	4.0703	5.45584	5.43791		3.42516	4.87882	3.65104	5.01295	5.35386	2.37235	3.42262	6.7509	5.65952	5.52436	4.82317	2.98305	3.56837	5.8384	3.89166	4.58223	4.78925	3.5168	4.60836	5.72719	4.63755	3.17676	4.66144	3.78386	6.83656	5.54036	4.26407	5.31269	5.16946	2.25273	5.34557
12.5	4.1892	4.49836	5.4187	4.50262	3.62347	4.76566	6.18167	4.33032	5.37783	3.62763	4.70748	4.60085	7.81154	5.42182	3.97974	5.29767	5.35319		3.52366	5.3352	3.19618	5.18342	5.85173	2.28839	3.5484	7.45257	5.30046	6.52911	4.34016	2.96053	3.21902	5.42763	4.46366	5.51579	4.43569	3.3984	4.38634	6.14637	4.75926	2.9223	4.72592	4.06048	5.60543	5.2043	4.18342	5.44145	5.19813	2.37181	5.03193
13	4.16738	4.67455	5.85011	4.84504	3.64625	4.78818	6.14401	4.19721	5.4676	3.62428	4.65605	4.45965	8.43316	5.15322	4.19501	5.23547	5.18181		3.75619	5.43034	3.50631	5.66907	5.8111	2.51783	3.51413	6.58657	5.33542	6.50876	4.28511	3.53218	3.78968	5.09762	4.2016	5.87665	3.26559	3.9262	4.58113	7.48964	4.34639	3.04831	4.57388	4.03116	6.05691	5.72365	4.25499	5.37313	5.1975	2.23846	5.2104
13.5	4.54465	4.92536	6.23847	5.50401	3.40015	4.50689	6.24912	4.51431	5.58797	3.39228	4.79238	4.53491	8.32338	5.19533	4.32548	5.05541	5.34424		4.29811	5.11289	3.75677	5.29144	5.68648	2.20995	3.66273	6.91732	5.90031	5.83521	4.17552	3.25579	3.56969	5.20396	4.27345	4.34043	3.2739	2.85302	4.38915	7.85674	5.68938	3.25945	4.77836	3.40241	6.36367	6.3973	4.28173	5.28105	5.45008	2.1129	5.07967
14	4.32872	4.43668	6.22008	5.64714	3.41267	5.18317	5.88052	4.17392	5.48374	3.68169	4.49091	4.70676	9.46054	5.3201	4.22735	5.03759	5.38507		4.50022	5.16177	3.73605	5.81461	5.2473	2.27891	3.56655	6.9085	5.54975	6.06655	4.15897	3.7924	3.78922	5.33738	4.06586	4.77267	3.53426	3.29126	4.07451	7.28289	5.6985	3.3612	4.97898	3.52456	6.52876	6.05715	4.38	4.87535	5.67675	1.95947	4.96767
14.5	4.16126	4.70413	6.09393	5.9958	3.62141	5.23583	6.13602	4.18602	5.30211	3.65953	4.68875	5.2854	10.2179	5.11726	4.43066	4.95802	5.07715		4.07879	5.188	3.71781	6.58326	5.98733	2.73734	3.40926	7.06927	5.6123	5.79848	4.85448	3.35683	3.48591	4.73756	3.75609	4.13216	4.04051	2.91923	4.42072	7.09101	6.10757	3.11651	4.98674	3.56492	5.913	6.29538	4.227	6.19893	5.25862	2.38165	5.7434
15	4.02293	4.53978	10.367438410314*	6.12256	3.75163	5.81366	5.88007	4.13261	5.13854	3.69423	4.56755	4.7991	8.95696	5.04141	4.46556	5.19154	5.35675		3.22683	5.20492	3.67026	6.43922	5.60822	2.80206	4.08169	6.8438	5.83377	6.45123	4.81804	3.23896	3.78036	5.65567	3.59229	4.34488	4.05478	3.09706	4.34283	6.6711	5.76325	3.70047	4.70978	3.71242	6.14526	5.85456	4.3568	5.32588	5.43424	2.13622	5.61644
15.5	3.91226	4.72904	10.9096523135513*	6.93987	3.71046	7.86862	6.15758	4.27217	5.50839	6.79497678231207*	4.73227	5.02937	9.65303	5.33718	4.39543	5.37537	5.59118		3.04673	5.0215	3.88595	6.10352	6.11196	2.98289	4.07903	10.7023970871636*	6.49513	5.81574	4.31196	3.31862	3.80726	6.44627	3.24472	4.58317	3.94404	2.98487	4.21383	5.90541	6.4695	3.19576	4.59813	3.41377	6.25833	6.36226	4.13521	4.66454	5.28759	2.13275	5.74356
16	4.20483	4.62585	12.0726711202765*	6.79755	3.91521	7.59078	6.13642	4.52847	5.59396	6.63319688267349*	4.71272	5.00176	9.99807	5.47527	4.28162	5.17668	5.36323		3.30603	4.71271	7.9203638162065*	6.64493	6.35956	2.57199	3.76441	7.1186	6.63604	5.70565	4.23377	3.20759	3.86726	6.60106	2.95736	5.13674	3.82053	2.44906	4.16477	7.097	5.6814	3.35061	5.37272	3.46824	5.84499	6.31644	4.41954	4.54235	5.27552	3.23036	5.34539
16.5	4.18509	4.44067	10.3915209127459*	6.7989	3.87577	7.35845	6.23674	4.10779	5.99655	6.81082030006787*	4.54506	5.18067	9.20662	5.27533	4.71318	5.25824	5.45171		2.86765	4.67509	3.68807	6.14848	6.29053	2.49381	4.01837	7.6895	6.08858	6.20389	4.18384	3.21346	3.74634	6.41878	3.26834	4.72047	4.05067	2.86069	4.34734	7.04365	5.06434	3.06609	5.17367	3.70785	5.83377	6.24097	4.59412	5.1875	5.61904	3.3579	5.31564
17	4.48411	4.49202	11.7919453682593*	6.78007	3.80276	7.82297	6.10499	3.96003	5.58577	6.81830034765045*	4.6425	4.96609	8.34882	5.12003	4.56337	5.14124	5.29859		2.84247	5.07235	4.08716	6.24487	6.2686	2.85417	3.86126	7.10937	6.55973	6.15366	4.33455	2.8666	3.6526	5.05012	2.57164	4.10116	4.35449	3.02958	4.40517	6.9969	5.17212	3.32412	5.03733	3.37153	6.6145	6.42919	4.54792	4.9239	4.94602	3.57571	5.03226
17.5	5.35396	4.48762	9.82643184316206*	7.22591	4.07942	6.86702	6.12847	4.16328	5.51043	7.06778454571719*	4.53251	5.02117	7.26721	5.22024	4.6959	5.20427	5.38619		3.061	4.88943	4.05325	5.55423	6.04691	2.85669	3.60854	8.80819	6.6147	6.58353	4.14536	2.77481	3.45488	6.22269	3.07189	4.33427	4.14626	2.99532	4.33673	7.71847	5.05825	3.10967	5.07828	3.1569	5.69756	6.61843	4.31021	5.03049	5.26203	3.54309	5.15782
18	4.35703	4.5711	10.6800776452871*	7.21495	4.04782	6.4029	5.63747	4.18331	5.30663	6.96554351707966*	4.68877	5.07476	7.82311	5.09695	4.72859	5.35268	5.34847		3.31411	4.87307	4.30805	5.88453	5.9742	2.93466	3.61354	7.18972	5.80932	7.09208	4.90671	2.78086	3.91277	5.50242	3.35613	5.66513	4.49823	3.27877	4.36374	7.09874	5.49045	2.961	5.32125	3.08957	5.33534	6.03967	4.14027	5.21887	4.99758	3.88915	4.92193
18.5	4.40073	4.71264	10.933756382522*	7.271	4.03167	6.5524	5.91046	3.96695	5.3163	3.78081	4.76062	5.28108	7.28609	5.10286	4.84863	4.98443	5.24773		3.03443	4.88115	4.26713	6.18698	5.71397	2.592	3.78989	7.05674	5.99657	6.98175	4.14156	2.84448	3.58116	5.29879	3.24092	5.70875	3.99991	3.4797	4.22612	7.39511	5.2038	3.62013	4.94748	2.6824	5.41033	5.22403	4.40719	4.62285	4.85683	3.89693	5.27551
19	4.61021	4.79279	10.6174465370215*	7.70507	4.13637	5.91965	6.55844	3.78694	5.25412	3.71335	4.86819	5.04801	7.1401	5.07505	4.69334	4.95489	5.1022		3.18283	5.01659	3.9727	5.76101	5.94946	2.51161	3.7093	6.91239	5.77106	7.01692	5.06821	2.81759	3.73088	5.31762	3.67203	5.32729	4.29928	3.77593	4.3584	7.00121	5.36174	3.50521	5.16801	3.03626	5.12075	4.982	4.74718	5.58864	5.1452	4.14783	5.14847
19.5	4.52534	4.88738	9.62330498840398*	7.70542	4.35481	5.72957	6.15721	3.86429	5.20662	3.92205	5.02368	5.13557	7.2312	5.01015	4.54241	5.23046	5.31948		3.02207	4.78645	3.89765	5.98075	6.00207	2.64782	3.32924	6.62351	5.74849	7.11722	4.28256	2.91177	4.32431	5.15623	4.39253	5.97474	4.62182	4.07762	4.75138	6.73968	4.39023	3.77028	5.22638	2.99938	5.48351	4.86181	4.68043	6.04735	4.73525	3.80187	5.15651
20	4.82466	4.9195	8.93819	7.65073	4.00037	6.51142	6.22806	3.70075	5.54015	3.79414	5.03929	4.77384	8.32259	5.1133	4.56896	5.34533	5.33148		3.14504	4.7691	3.88524	6.51425	6.19686	3.1132	3.94197	7.13296	5.70054	6.9007	4.10665	2.87851	4.08785	5.4963	3.73424	5.22774	3.88198	3.80881	5.37516	6.89278	4.53188	2.99307	5.21445	3.1978	5.99957	4.82269	4.89944	5.26785	5.0275	4.19169	5.08359
20.5	4.9557	5.01799	8.35925	7.5933	3.70331	6.93767	5.87762	3.88386	5.26541	3.8795	4.78545	10.3003228782133*	8.58972	5.18448	4.48719	5.35889	5.54322		3.19576	4.84468	3.92482	5.78662	6.1877	3.28446	3.43872	6.66962	6.19674	6.92394	4.24481	3.03794	4.23312	5.35519	3.64361	5.29415	4.21683	3.32625	5.24547	6.65668	5.25354	3.77998	5.28665	3.00935	6.24873	4.73041	4.88822	4.70847	5.14766	4.50895	5.25092
21	4.69539	4.94318	8.60632	7.78131	3.70871	6.52002	5.76136	4.13468	5.49015	3.84105	4.94173	4.93347	8.41072	5.42828	4.63434	5.10607	5.37968		3.28735	4.71095	8.72198018703487*	6.22314	6.39694	3.30212	3.51213	6.45896	6.43631	7.07835	4.22852	3.11079	3.79366	4.48459	3.97783	5.262	3.99528	3.4233	5.60605	6.82214	5.37529	3.76878	5.35072	3.51633	6.64573	5.30078	4.76086	5.03418	4.90689	4.75918	5.36902
21.5	4.95697	4.84845	7.46221	7.93886	4.87636	5.86044	5.4884	4.56886	8.69066	4.74967	4.73214	5.16186	8.47588	5.04473	4.94713	5.03776	5.44146		3.53253	4.72638	4.22222	5.7981	6.7069	3.57578	3.40579	6.42507	6.34043	6.45159	4.16371	3.29418	3.76292	4.73715	3.5406	5.04951	4.39445	3.46707	6.03758	7.69796	5.30921	4.06447	5.3842	3.11319	6.40074	5.43538	4.82003	5.03289	4.85935	4.28973	5.35729
22	4.88601	4.98597	6.86028	8.72615	5.31024	5.77926	5.89325	4.54272	8.16134	3.60953	4.85713	5.08055	7.78062	5.00756	4.93058	5.15562	5.56248		3.45354	4.79176	4.0107	6.45564	6.45439	3.1815	3.13365	6.13898	6.13101	6.30426	4.95825	3.24283	3.93056	5.05944	3.80928	4.76189	4.26128	2.67013	5.55259	7.80491	4.60967	3.68596	5.49608	3.25143	6.11426	5.44979	4.86171	4.95967	4.89358	4.40691	4.93096
22.5	4.80603	4.90709	7.38894	8.60311	5.06972	6.77255	5.9073	4.75143	8.02734	3.49493	4.91485	5.38955	7.44482	5.19619	4.39962	5.27874	5.55656		3.41699	4.92055	3.74005	6.10703	6.54376	3.57778	3.76252	6.41895	5.53138	7.08205	4.7133	3.24797	3.86376	5.04655	3.24656	4.54923	4.49085	3.13881	4.06483	7.97277	4.66639	3.79895	5.6169	3.30749	6.01996	5.85258	4.19074	5.42257	5.18104	4.27424	5.34963
23	8.28899502413692*	5.09623	8.05922	9.04616	4.92182	6.46339	5.59953	4.33292	8.1304	3.63878	5.21481	5.23435	7.81047	5.04947	4.79602	5.05714	5.19637		4.0978	4.67215	4.11052	6.44916	6.55763	3.45461	3.89264	6.22919	6.28562	6.73794	5.09872	3.53352	4.1979	6.12183	3.65498	4.73647	4.36674	3.39928	4.50543	8.57622	5.29905	3.71627	5.69615	3.09221	6.86135	5.45812	4.39922	4.76307	4.94224	4.30889	4.8948
23.5	4.80162	5.02722	8.13435	9.31436	4.62706	6.77981	6.04586	4.30611	7.90202	3.78157	5.12377	5.39624	8.88981	4.94769	4.72675	5.33894	5.50805		4.13348	5.63769	4.12176	5.62299	6.46784	3.09919	3.63803	6.57407	5.97136	7.13022	5.65131	3.05904	4.23167	6.25451	3.61695	4.70938	4.08909	2.56669	4.05014	8.41126	4.28917	4.95826	5.62037	2.99303	6.45797	5.17576	4.08207	5.17654	5.39544	4.05262	4.94791
24	4.82562	5.10724	7.82259	8.94074	4.649	6.61225	5.94753	4.68818	7.12255	3.67046	5.06101	5.06849	8.39215	5.25227	4.7241	5.1092	5.29465		4.31185	4.69455	3.78589	6.11429	6.27541	2.82259	4.14934	6.71363	6.28434	6.36448	5.17357	3.63055	3.95244	5.90866	3.66866	5.17931	3.94603	3.06517	4.28029	7.88541	4.70818	4.76597	5.76554	3.21749	5.62212	5.20419	4.53525	5.39042	5.35247	4.23603	4.9285
24.5	5.09083	4.84803	7.94813	8.93677	6.30411	6.79795	6.13037	5.00257	6.58661	3.4528	5.05934	5.09555	8.33026	5.3269	4.73739	5.09667	5.37185		4.15889	4.85267	4.10469	5.57879	6.05007	6.75155987538443*	3.81341	6.35262	6.05585	6.59006	5.5603	3.73536	4.25188	5.52783	3.4228	5.0427	4.3149	3.3254	4.62218	8.05934	4.28341	4.52194	6.22341	3.06353	5.95551	5.12652	4.31944	5.10657	5.27384	3.9432	5.07027
25	10.6569140107232*	4.93554	8.17378	9.28771	6.8656	7.00465	5.99541	4.89689	5.71893	3.59855	5.18772	5.39397	7.74234	5.37324	4.79871	5.1371	5.50343		4.26644	4.7882	4.67815	5.66645	6.47683	3.0753	3.57651	6.3327	5.83647	2.18519128413075*	5.43543	3.65125	4.14511	5.62014	4.05695	4.87879	5.13277	3.163	4.20607	7.23166	5.26187	4.8378	5.90343	3.13972	5.98326	5.15432	4.41205	5.03562	4.47999	4.28328	5.04283
25.5	10.5605199060803*	4.8343	8.20889	9.42443	8.41992	7.00525	6.17693	4.68926	6.06064	3.82205	4.88803	5.26458	7.84136	5.52497	4.82644	5.28359	5.4922		3.78184	4.52652	4.38198	5.17967	6.36028	3.05857	3.79887	6.51902	6.07295	7.08321	5.14037	3.96695	4.1922	5.81559	3.76799	4.75101	4.79642	3.4877	5.26365	7.71059	4.77983	4.99267	5.87015	3.25887	5.98478	5.41644	4.19892	4.07288	5.13892	4.70483	4.4831
26	4.84212	5.27594	8.40181	9.81459	7.06425	7.37799	5.9659	4.72597	6.99231	3.88705	4.86905	5.17422	7.53216	5.33647	4.96569	5.41101	5.5014		3.94025	5.0967	3.87054	5.03957	6.19698	2.78632	12.1059934727143*	16.5399345774776*	6.09252	11.5032202833524*	4.9298	4.34364	4.5504	5.18798	3.83133	5.54521	5.26328	3.16772	4.34004	6.74498	4.9034	5.60897	5.80146	3.58083	6.01105	5.56482	4.2282	4.7914	5.21155	4.33511	4.8717
26.5	4.80157	4.92597	8.34599	9.60529	6.82007	7.68967	5.93504	4.73045	6.68617	3.72813	4.87115	5.16376	7.28894	5.27982	4.71118	5.40027	5.42503		3.82451	4.70286	4.41196	5.54209	6.48861	3.03661	3.91355	6.3551	6.30469	6.64968	5.29437	4.04816	3.91081	4.85492	4.02297	5.79217	5.54431	3.74608	4.3681	6.96585	5.48981	5.32071	5.58475	3.55898	6.19918	5.48137	3.98083	4.16241	5.36862	4.226	5.1811
27	4.66136	5.05847	8.44386	10.4898090358663*	5.86654	6.93777	5.87111	4.77406	5.97704	3.31028	5.08935	5.04776	7.51255	5.45529	4.76437	5.6963	5.67217		3.5528	4.61812	4.56858	5.53672	6.94156	3.42096	3.96867	6.35107	6.92007	6.43503	4.99048	3.76791	3.38203	5.04198	4.42335	5.76129	5.7558	3.19359	10.2091103945358*	6.84101	5.02879	5.46983	5.84449	3.48353	6.57662	5.40172	3.83565	4.37272	5.91304	4.53656	4.76551
27.5	4.93196	4.97693	8.40545	10.5470569102163*	5.50317	7.54721	6.08765	4.96962	6.3876	3.57611	5.07226	5.24205	7.94346	5.39499	4.84073	5.46153	5.52824		3.75698	4.45215	4.61186	6.11612	6.60437	2.96056	4.35452	6.7761	7.23721	6.35918	5.19235	4.008	3.01609	5.40128	2.47544	6.05121	5.34448	3.01453	4.28829	7.05948	4.81097	5.92029	5.85206	3.56552	6.86203	5.23122	3.95196	3.97123	5.42054	4.22766	4.72672
28	4.87756	5.00139	8.73939	10.6287843769754*	5.90849	7.72489	6.12626	4.9587	5.88171	3.74544	4.97843	5.14422	7.73489	5.34754	4.82307	5.30647	5.50483		3.36799	5.07357	4.49528	5.54945	6.29416	3.39521	4.26524	6.34888	1.98025435574083*	6.44042	5.32015	4.06366	3.19345	5.10054	3.00948	5.02374	4.69698	3.36853	4.07308	7.64192	5.44293	5.80215	6.35941	3.63461	6.72171	5.64125	3.79871	3.89207	5.30639	4.63532	4.97583
28.5	4.88458	5.00493	8.78683	10.2773066979717*	5.53942	7.98284	6.17652	4.69648	5.91561	4.03217	4.86737	5.08887	8.53579	5.07636	4.93031	5.14685	5.55019		3.68238	4.54579	8.26776303281531*	5.9503	6.25445	3.24898	3.86994	7.1593	6.5525	6.25008	4.75092	4.39853	2.74967	4.61706	2.85674	5.68309	4.93739	3.37948	4.66595	7.83052	5.5487	5.37913	6.33188	3.9754	6.64059	4.89171	3.97911	4.20393	4.88092	4.23656	4.9628
29	4.65518	5.0586	8.64288	9.98796622520246*	5.65971	8.13953	6.06075	4.9425	5.78591	3.83925	4.69781	4.95722	7.59582	5.43614	5.12512	5.16517	5.39232		3.24299	4.79133	8.59447816137839*	5.7633	6.78737	3.09294	4.34365	0.360883	6.17462	6.19471	5.26532	4.38886	3.01264	4.82919	2.05049	5.90566	5.26112	3.39749	4.61096	7.70269	5.9663	5.40003	6.41758	4.06708	7.09536	5.00299	4.17941	4.47079	5.29149	4.1719	5.30265
29.5	4.82453	5.11193	8.52792	10.1192830946425*	6.47853	8.29886	6.40512	5.09835	5.87048	4.25147	4.98626	5.08055	7.8362	5.18526	5.02968	5.12646	5.26406		3.57089	4.71966	8.10754365413226*	5.77487	6.79462	2.78606	4.13882	6.74817	6.8956	6.57573	5.83993	4.07359	3.1199	4.97419	2.61974	5.65826	4.77232	3.10695	4.43967	7.46921	6.10619	5.34831	6.04997	4.09855	6.99504	5.03589	3.97688	4.29098	5.80039	4.23084	5.06891
30	4.87805	4.66413	8.76875	9.96573	6.3174	8.02938	6.45766	5.136	5.95444	4.23092	4.84686	5.30588	7.83919	5.33827	4.7353	5.27076	5.44331		3.51053	4.82376	7.74807530635231*	5.44952	7.23387	3.03871	3.94041	6.40138	6.20308	6.0921	5.11749	4.17886	3.26449	5.00737	2.84124	5.94004	4.82676	3.39068	4.62828	7.93491	5.78532	5.80782	5.93702	4.41058	6.71403	4.93544	4.00237	4.07179	5.74646	4.25108	4.76357
[truncated: 1 more columns]
