# Supplementary material for: Microtubules restrict F-actin polymerization to the immune synapse via GEF-H1 to maintain polarity in lymphocytes
Source: eLife journal article supplement (doi:10.7554/elife.78330), 2022-09-16
Supplement: supp [file Figure4E_F.xlsx]

## Sheet: 4E
Centrosome-droplet distance avg 25-30min
DMSO	LatA
1.48141	1.06133
0.435264	0
2.88452	0.561364
2.01323	2.03864
3.91864	0.265909
1.59173	2.15652
0.86905	2.17322
2.01547	0
1.27893	4.44825
0	1.30142
0.866745	0.994382
2.75411	1.09451
1.73509	0.579977
1.4498	1.10825
0.443182	1.46064
2.1395	1.16521
	1.18752
	0.884089
	0.812736
	0.892155
	0.786205
	0.231282
	1.5132
	2.72533
	0.0590909
	1.35531
	1.47213
	0.643382

## Sheet: 4F
Centrosome characteristic polarization time (min). Only computed for cells meeting the criteria described in the paper
DMSO	LatA
14	7.5
6.5	0.5
8	7.5
12.5	2
4.5	0.5
11.5	2.5
6.5	2
6	2.5
19	18
19.5
