# Supplementary material for: Microtubules restrict F-actin polymerization to the immune synapse via GEF-H1 to maintain polarity in lymphocytes
Source: eLife journal article supplement (doi:10.7554/elife.78330), 2022-09-16
Supplement: supp [file Figure4G.xlsx]

## Sheet: Sheet 1
Centrosome and nucleus orientation (one line = one cell at one time point), pooled first 15 minutes with 1 image every 30s, for control cells
Data with an asterisk are data for which centrosome or nuclear indentation detection were problematic, and were therefore excluded
Centrosome	Nucleus
27.121374461994*	117.742188378586*
129.815	112.116
102.831	87.7441
108.989	113.361
103.972	101.621
121.876	126.433
100.67	97.8698
58.6427	101.203
82.9287	74.8577
92.812	85.9837
94.4198	84.301
103.184	102.077
89.8262	74.1389
73.8441	4.02939705279852*
5.1223811209034*	4.14022907768983*
5.91908030221043*	4.66367244935185*
3.85910743433705*	2.12494169893539*
54.1191	46.3854
58.6327	44.0957
32.7718	26.5892
79.8656	59.48
63.1084	56.3763
57.9874	53.4281
23.5641	28.6285
57.9438	76.4634
62.1263	65.0411
23.984493306356*	61.9749
50.9612	43.8193
50.0563	50.4204
46.556	54.5821
51.8002	55.4525
96.6836	122.789
103.147	101.81
107.597	102.049
118.283	127.532
123.824	106.397
109.708	100.79
102.294	100.751
74.5698	95.6463
77.3564	96.1149
102.519	113.643
73.5767	89.0771
60.2253	96.6761
37.2308	75.8578
57.3782415361411*	54.9788
25.3305	64.4456
2.21242	31.1697
19.4909	30.2525
9.47104	18.7459
15.9756	20.8703
15.3128	21.8712
27.53	28.2625
26.7252	49.7095
36.4259	50.3838
15.5236	27.939
24.8252	15.4802
18.9921	24.0407
13.2575	24.0248
9.94388	28.1572
11.1049	22.76
5.96979	56.3437
15.184	6.07724
27.3565	12.7961
11.5464	25.6127
4.11924	28.9555
3.75963	30.5292
8.46018	18.4958
9.5339	27.3283
15.9873	16.6318
13.6082	37.32
12.1631	21.0794
14.2117	19.4812
10.1569	21.9715
8.50218	21.0359
13.0109	24.225
15.2449	22.1635
16.7493	9.54465
19.121	0.227905
15.4119	16.1378
17.4085	12.2394
15.8938	22.2359
13.0517	17.5178
14.036	22.2099
11.6118	22.872
18.8134	20.1079
13.528	9.19656
25.8932	12.7013
20.5749	13.5743
24.8261	11.0892
18.642	14.9015
20.2382	18.4584
27.8085	24.569
13.8596	16.1062
47.9972	43.67
13.962973818152*	24.4553
45.0161	30.8117
40.7561	42.5836
34.1273	36.3449
29.3641	30.0434
26.2325	43.1851
22.3369	31.3896
16.8934	35.9663
18.6445	36.356
27.5	33.8926
21.4813	29.7657
28.9681	17.6952
28.539	12.0686
27.1214	17.6863
21.1661	51.3707
23.069	53.0748
25.6403	56.8087
19.256	50.0005
18.9046	42.3541
6.2864	36.7919
13.8926	38.9148
23.0417	20.5331
7.24794	23.8484
20.1899	41.9624
17.7299	42.145
17.9527	45.2646
16.3422	42.9278
3.43347	27.9097
4.16839	28.1298
3.08118	30.1518
101.091	120.356
103.682	130.537
110.281	127.298
101.52	130.523
100.869	114.4
101.284	117.478
93.0809	114.559
90.3684	118.455
91.1353	128.579
81.3249	130.899
78.288	124.627
73.9757	135.904
65.7532	127.832
49.2849	137.029
38.2075066834962*	138.039
43.1332	142.16
47.3592	140.631
49.4603	128.309
46.9379	130.693
47.6299	132.522
56.6366	125.734
53.8702	127.534
52.4889	129.686
42.5062	133.173
40.7126	133.711
51.9813	120.898
57.747	118.428
51.8365	129.73
54.3906	131.514
46.9171	134.575
51.9109	129.695
70.0457	40.0016
36.6785	45.3485
39.4464	20.6426
37.2732	15.6363
28.1493	12.0515
11.2889	10.226
26.7611	20.1585
28.6479	24.4251
34.4867	27.048
27.6296	29.6378
21.2121	40.348
30.091	35.6713
28.2423	27.8943
29.8174	28.9937
21.9982	33.5068
18.7458	32.7359
15.823	26.3234
14.7625	32.955
19.4696	29.5138
22.5409	16.1246
11.0172	18.9393
8.42636	21.2269
19.4656	20.8558
11.1002	15.1246
17.536	7.7013
13.7591	14.2833
21.7713	24.7365
26.5777	29.4761
27.3855	19.7409
27.7515	8.37826
24.7318	5.14986
80.0169	98.3015
102.644	106.762
100.835	96.128
82.2522	90.9784
99.2155	90.3775
72.2286	102.544
84.7839	101.32
78.1213	105.623
49.325	92.4941
46.8991	77.5348
41.7088	84.849
40.6666	62.1187
40.9074	70.1679
27.131	53.2744
41.2633	94.4417
48.2796	85.9555
40.9752	83.107
32.0972	68.5489
45.238	53.0983
45.5421	51.2667
41.7811	55.7779
37.1344	63.2169
30.911	84.9482
33.6443	83.6548
25.0667	63.6349
20.1295	58.7152
21.5191	62.1566
26.191	78.6266
13.9652	59.4016
23.369	61.7724
7.71603	51.9741
66.2933	75.5179
71.1322	99.9355
71.1115	67.6371
90.7512	76.8695
83.9735	62.0894
74.3233	84.6797
43.1382	69.7219
25.8283	48.417
36.0263	40.5327
9.59526	27.2196
17.3148	33.6432
8.82788	30.7872
8.66784	44.4081
11.983	37.2741
13.117	21.5385
6.96309	22.6258
6.58243	14.6526
17.9074	31.797
19.8421	23.0929
18.3898	19.2718
20.9538	18.6707
22.0399	21.3946
6.3333	25.7217
7.07563	24.2799
21.1569	34.2724
23.079	23.7129
28.328	28.4509
20.1876	18.8559
23.4372	51.9759
21.1193	45.4207
16.5685	26.6658
44.8895	77.2474
67.2824	42.7529
61.1137	47.5658
86.5134	7.7175
97.8924	21.0344
55.4759	2.34503
76.7989	13.1436
76.5326	8.39572
104.648	12.6707
109.222	69.3005
63.4752	20.9625
114.046	7.41346
51.9225	16.3948
61.0643	15.665
23.604	29.811
35.4536	20.2149
30.3597	23.7774
20.489	15.1246
5.34427	25.4994
6.61489	8.87978
12.1221	14.4756
13.805	15.447
16.6443	22.9333
17.059	32.4384
11.384	27.6687
5.9002	29.2929
11.8319	47.7209
20.2444	38.7395
18.734	38.3367
15.3793	44.1063
18.0646	35.5958
142.733	129.647
141.783	132.788
125.738	124.721
121.445	120.055
111.881	100.794
106.912	98.0009
107.339	91.3422
82.0411	70.3465
77.5136	74.9858
80.4081	62.7399
74.786	69.4442
72.7582	68.3882
47.8383	47.3725
35.5863	49.0399
43.2074	52.0365
44.3789	49.7872
40.7374	41.7512
28.5299	27.0477
30.9838	50.9828
27.8488	29.7034
17.1385	28.0747
16.1157	33.8416
18.664	32.8304
13.0226	14.2444
16.1789	26.7249
14.6761	32.4402
17.5079	19.8574
17.3153	11.093
20.009	24.3275
9.35216	12.9627
16.5863	25.075
30.5314	16.8425
15.2142	16.3325
16.0759	4.999
7.94562	25.6396
12.533	35.1997
10.4842	32.203
15.8281	29.6074
11.2973	21.6666
29.1191	25.8027
8.69979711040864*	12.5081
16.3967	8.03543
14.3281	4.53503
20.3475	20.7713
16.9414842654579*	15.8154
15.8858435634414*	17.4475
11.6223	20.2733
21.5849	41.6347
21.8764	34.5283
21.2835	37.0718
23.7576	22.6739
8.25459	19.9055
2.03263	10.6267
16.205	26.4996
10.3584	25.3317
24.8821	19.3557
23.3829	29.418
17.3302	17.5148
17.8374	31.7516
18.6989	15.709
11.5184	28.024
20.3817	26.0144
102.667	97.3466
97.6838	100.758
79.4577	76.9679
70.7373	96.3885
67.2602	83.2599
60.6974	70.8452
50.0918	57.3207
45.4976	61.5134
38.8429	52.9642
37.9839	46.5779
47.2533	51.3612
32.957	46.6388
29.7648	53.3123
33.4147	48.0398
22.5192	48.4458
16.9788	41.8096
2.35187	24.3816
1.14842	29.1914
16.9914	37.9448
5.02022	29.9887
8.4087	26.2861
6.34377	25.6511
6.06585	23.1353
9.87032	16.4102
8.17522	24.6352
4.30881	16.2957
5.10929	19.1394
4.60674	37.7092
10.7765	13.7488
10.1894	13.1732
20.8503	18.3096
133.974	118.317
42.5951567952047*	118.403
137.863	132.297
122.889	119.556
132.486	132.396
47.3904	112.219
123.816	94.7021
126.809	106.309
101.017	98.7175
101.932	110.225
109.979	107.073
91.7181	103.872
105.909	105.855
91.922	89.0468
70.3348	88.869
94.0832	83.1689
86.4547	75.5377
85.9672	78.5659
88.6949	76.6583
77.5708	86.8085
69.4709	60.9678
62.2676	75.5942
51.2596	58.7682
54.2209	53.1124
49.3581	49.3561
55.9474	57.6061
62.8075	59.1629
60.5151	56.9692
45.2643	50.1388
42.4515	33.5058
51.1832	51.9008
22.0053	12.4759
38.7581	11.1216
30.9407	13.7297
36.7851	26.5696
30.7432	4.63923
21.8282	21.1367
27.9868	21.1185
29.5577	27.3427
31.6958	16.1479
18.0143	44.8845
30.1608	34.9435
32.6267	44.151
36.7014	23.8125
28.1661	40.8057
14.7037	40.7638
19.5412	54.7903
44.2655	53.4986
39.7113	71.3366
38.2274	68.2505
20.9587	46.579
42.7182	40.9285
24.9372	27.0539
40.5114	35.8104
35.0763	33.997
36.7457	23.5192
17.613	52.7757
4.18208	23.7055
24.3874	45.0731
24.6236	50.5833
20.3121	57.6879
17.35	48.776
15.0084	8.76761
15.3822	27.4031
24.7968	11.3208
21.8628	23.9663
13.4788	40.0103
13.8155	33.1059
12.0849	18.9402
14.6649	14.5154
8.4193	26.9907
6.77893	40.8836
26.48	40.0443
25.711	18.6037
38.6346	49.2007
25.9569	59.7735
34.5632	49.3292
42.4544	51.4202
26.6808	41.8059
11.8515	20.4667
6.34975	3.3877
18.0636	6.23883
14.8296	11.6046
6.002	26.8683
4.57043	9.17457
12.2964	13.5683
13.4836	53.9543
18.4124	28.3475
19.369	39.7094
13.8213	34.8224
26.3909	22.0695
15.9547	19.4479
13.0624	18.0331
60.2322314227413*	137.154
152.286	143.627
129.103	127.478
145.075	113.871
127.1	119.61
141.456	117.038
120.365	108.221
122.578	95.3589
121.833	99.4013
108.679	112.45
97.5323	103.772
117.939	100.689
74.2465	84.5808
63.4145	76.9065
50.122	72.3129
62.6002	92.948
61.4384	85.4223
61.997	86.807
54.9685	76.8254
45.6421	55.1362
57.7885	64.8193
64.2719	67.3211
50.4473	57.0761
45.4197	65.2866
42.7219	49.6301
60.6471	58.2221
42.8831	69.4045
50.7657	77.3714
41.4602	58.132
36.4678	64.372
52.5542	53.1971
