# Supplementary material for: Microtubules restrict F-actin polymerization to the immune synapse via GEF-H1 to maintain polarity in lymphocytes
Source: eLife journal article supplement (doi:10.7554/elife.78330), 2022-09-16
Supplement: supp [file Figure5A.xlsx]

## Sheet: Sheet 1
Avg 25-30min Centrosome-droplet distance (µm)
DMSO	Nocodazole
2.349	6.67633
3.24489	8.91527
4.37312	11.1216
3.04678	8.7734
4.0414	12.4575
9.9002	11.9498
3.52518	6.40729
2.724	9.6019
11.1416	6.62733
4.2996	14.5905
4.748	6.957
2.2366	13.072
	11.884
	4.69582
	9.47309
	10.8508
	4.077
	14.102
	9.09489
	8.99967
