# Supplementary material for: Microtubules restrict F-actin polymerization to the immune synapse via GEF-H1 to maintain polarity in lymphocytes
Source: eLife journal article supplement (doi:10.7554/elife.78330), 2022-09-16
Supplement: supp [file Figure5B_C.xlsx]

## Sheet: 5B
Avg 25-30min Nucleus-droplet distance (µm)
DMSO	Noco
4.79509	4.94882
4.15455	10.3223
4.52382	2.31327
5.25573	2.90091
5.97645	2.67382
3.8488	2.85582
4.66255	3.51355
6.83555	10.5671
6.96291	3.5585
7.33391	3.43555
6.001	3.59482
3.45136	7.6913
7.52382	3.12264
5.313	2.37364
	5.79927
	3.71818
	3.89236
	4.10564
	2.47509
	5.14536

## Sheet: 5C
%Coefficient of Variation of 2D Aspect Ratio of the Nucleus
DMSO	Nocodazole
6.131	17.23
5.769	14.47
6.045	9.794
5.365	22
5.435	4.563
3.958	25.52
13.25	16.12
5.76	17.99
5.866	16.43
5.864	7.531
5.782	13.75
11.2	15.26
4.414	8.257
10.1	14.64
	25.13
	11.33
	24.62
	20.69
	11.12
	15.19
