# Supplementary material for: Microtubules restrict F-actin polymerization to the immune synapse via GEF-H1 to maintain polarity in lymphocytes
Source: eLife journal article supplement (doi:10.7554/elife.78330), 2022-09-16
Supplement: supp [file Figure5E_F.xlsx]

## Sheet: 5E
%Coefficient of Variation of 2D Aspect Ratio of the Cell
DMSO	Noco
7.979	14.33
5.594	14.19
10.03	15.38
2.894	11.49
12.09	21.99
2.188	14.39
12.27	10.2
9.223	14.77
	16.62
	11.86
	9.264

## Sheet: 5F
Median 2D Solidity of the cell
DMSO	Noco
0.927	0.875
0.957	0.892
0.9335	0.87
0.961	0.9195
0.93	0.899
0.941	0.883
0.945	0.948
0.945	0.896
	0.908
	0.926
	0.905
