# Supplementary material for: Microtubules restrict F-actin polymerization to the immune synapse via GEF-H1 to maintain polarity in lymphocytes
Source: eLife journal article supplement (doi:10.7554/elife.78330), 2022-09-16
Supplement: supp [file Figure5G_H.xlsx]

## Sheet: 5G
Average number of actin maxima (1 value per cell)
DMSO	Nocodazole
1.241	3.181
1.066	1.436
1.436	2.736
1.092	1.545
1.154	1.351
1	1.589
1.054	1.099
1.077	1.895
	1.158
	1.473
	1.312

## Sheet: 5H
Average distance of actin maxima to the droplet surface(µm)
DMSO	Nocodazole
0.2177	6.4
3.162	7.501
4.641	9.278
7.222	5.981
1.398	6.856
9.176	7.223
3.051	5.479
2.365	5.607
	5.511
	5.451
	6.917
