# Supplementary material for: Microtubules restrict F-actin polymerization to the immune synapse via GEF-H1 to maintain polarity in lymphocytes
Source: eLife journal article supplement (doi:10.7554/elife.78330), 2022-09-16
Supplement: supp [file Figure5J.xlsx]

## Sheet: Sheet 1
Plateau (Average 25-30min) Antigen recruitment
DMSO	Noco
1.45728	1.28894
1.49108	1.15562
1.20727	1.80099
1.59229	1.39141
1.42112	1.32907
1.50958	1.5638
2.14646	1.1842
1.42385	1.39369
2.28063	1.30186
1.29856	1.07294
2.25498	1.45318
1.5543	1.13065
2.33041	1.94889
1.74844	1.8126
	1.70333
	2.04104
	1.55694
	0.860716
	1.57737
	1.57012
