# Supplementary material for: Microtubules restrict F-actin polymerization to the immune synapse via GEF-H1 to maintain polarity in lymphocytes
Source: eLife journal article supplement (doi:10.7554/elife.78330), 2022-09-16
Supplement: supp [file Figure5K.xlsx]

## Sheet: Sheet 1
Enrichment of DAG reporter at the immune synapse
Time (min)	DMSO															Nocodazole
0	1	1	1	1	1	1	1	1	1	1	1	1	1			1	1	1	1	1	1	1	1	1	1
0.5	1.86427	1.02373	1.89623	1.68243	4.0064	1.0989	1.76187	1.17198	1.06637	1.36232	2.13032	1.15507	1.42489			3.50887	0.990396	4.35586	2.71377	1.48725	3.02791	1.44994	1.62851	0.857346	1.79535
1	2.47268	0.860998	3.32656	3.4258	7.34779	1.33354	1.7339	0	1.10904	1.06396	2.11028	1.45074	2.19517			4.24517	2.10949	5.83455	3.50841	0.967985	1.8852	1.2868	1.31352	0.775042	1.95213
1.5	2.76627	0.830477	3.37677	5.51746	7.83082	1.33952	1.60745	1.60718	1.49	1.12258	1.69351	1.31256	2.93464			5.59526	2.48023	5.76052	2.94591	1.02618	0.555013	1.17153	1.2571	0.595496	2.4289
2	3.31225	1.0252	4.97868	3.2086	7.41963	1.4109	1.75522	1.08852	1.36475	1.10238	1.3594	0.9625	2.50904			5.04431	2.70675	6.56808	3.79894	0.988066	1.9399	1.20243	1.3153	0.686061	2.4801
2.5	2.81227	0.92302	3.28495	2.19286	5.58741	1.3248	1.88314	0.965866	1.63714	1.33191	1.69678	1.1363	2.77751			4.34444	2.81545	5.323	3.11714	0.980952	3.19411	1.52013	1.4924	0.498207	2.668
3	2.55262	0.897708	3.97417	2.02757	5.08756	1.39258	1.73135	0.986084	1.55829	1.16809	1.51253	1.24214	2.68367			3.88725	3.12413	6.14141	4.44029	1.03141	2.49317	0.939423	2.269	0.644239	3.05279
3.5	2.31517	0.773544	4.59476	2.3342	5.01444	1.18688	1.67351	1.09992	1.69937	1.31519	2.50568	1.27747	2.74043			3.53458	2.9537	4.58863	3.77349	0.603348	3.13738	1.01471	2.23674	1.01311	2.84
4	1.91803	1.13373	3.87951	2.04923	5.3872	1.2804	1.50109	0.980567	1.47991	1.28539	2.31893	1.33567	2.90289			3.51494	4.26841	5.2752	4.29456	0.823969	3.8766	0.980452	1.82341	0.981185	2.98918
4.5	1.83001	1.23351	3.5282	2.0207	5.30506	1.31718	1.31838	0.874901	1.18566	1.20288	2.41947	1.28155	2.46598			4.29265	3.34449	5.1545	6.6005	0.50638	0	0.684413	1.48879	1.29639	3.27063
5	1.65918	1.2086	3.0341	1.8085	5.46853	1.26764	1.30986	1.00414	1.17411	1.33364	1.57849	1.22564	2.23642			4.34131	2.8469	4.54416	5.95942	1.02846	5.67757	0.530994	1.1316	0.830504	3.20557
5.5	2.14304	1.05572	3.31139	2.13437	6.28981	1.24117	1.49261	0.79643	1.14954	1.56162	1.95599	1.13471	2.31936			4.21222	3.03061	2.73224	6.49302	0.549096	3.59718	1.02213	0.825465	0.966043	3.28486
6	2.31798	0.95418	3.10945	2.15173	6.29499	1.27535	1.50011	1.05924	1.14008	1.45257	2.61427	1.09296	2.15243			4.14238	3.2035	3.96876	7.41607	0.885018	4.22967	1.01391	0.850586	0.902415	3.20643
6.5	2.08467	0.990069	6.11078	2.24958	6.12715	1.38851	1.52232	0.619812	1.1002	1.5004	1.96672	1.3631	2.24856			4.31728	3.52442	3.60657	6.58268	0.667968	2.23104	0.903711	0.594457	0.573934	2.78682
7	2.21329	0.981041	4.71105	1.91808	6.21214	1.25308	1.70747	0.78636	1.07951	1.61757	1.55826	1.16109	2.29233			3.97098	2.24782	4.02946	4.30926	0.478173	3.27566	0.902224	0.964914	0.501341	2.72771
7.5	2.33016	1.15213	5.52363	2.57156	6.1279	1.2427	1.65076	0.915993	1.06889	1.66952	1.73272	1.29244	2.29767			3.57404	3.85031	5.1495	4.31984	1.03915	2.29297	0.380028	0.639613	0.608697	2.76553
8	2.38445	0.928094	5.95278	2.53761	7.73057	1.32662	1.73616	1.56796	1.02957	1.60999	1.87715	1.10192	2.35396			3.63836	4.21556	4.51235	5.64982	0.732382	5.75214	1.07453	0.610353	0.932664	3.36436
8.5	2.48862	1.0632	5.7364	2.34211	5.49089	1.15692	1.49694	0.669599	0.992687	1.58714	2.14905	1.25732	2.42503			3.84033	3.64595	3.84906	6.19816	0.690315	1.8411	1.15926	1.6644	1.07753	3.27974
9	2.61178	1.02205	4.51512	2.12321	8.3071	1.28141	1.54418	0.728621	0.983293	1.59418	2.29682	1.3067	2.4198			4.04344	3.08177	4.8229	7.11858	1.2838	2.13629	0.71385	1.20305	0.901153	3.47145
9.5	2.24901	1.02129	4.03155	1.83857	6.62683	1.26898	1.52868	0.96876	0.998896	1.7113	1.90178	1.30893	2.36907			4.06979	3.77091	5.27229	4.96553	0.745865	1.43507	0.71073	0.722948	0.860932	3.11466
10	2.33973	0.958832	3.82026	1.89756	5.69669	1.23055	1.40645	1.07694	1.04412	1.55836	1.08906	1.20211	2.50009			4.07295	2.88113	3.61877	5.22261	1.3203	1.69595	0.459972	0.898252	0.745754	3.46712
10.5	2.48456	0.892506	2.61441	1.85574	5.43354	1.26866	1.48476	0.989176	1.02959	1.65868	2.01341	1.3729	2.46444			4.31876	5.25963	2.75931	5.26942	1.05251	2.88344	0.595664	1.53017	1.22386	2.99017
11	2.17949	0.942878	2.5308	1.96295	5.62357	1.32206	1.38088	0.817559	1.00395	1.61146	1.19544	1.25899	2.70285			4.25079	6.27556	4.87577	4.77849	0.911357	0.00784651	0.754712	1.57112	1.01177	3.24455
11.5	2.52352	0.936018	1.97784	2.11698	4.69541	1.28818	1.41718	1.05152	0.803573	1.56735	1.52341	1.31054	2.61866			4.88205	5.02829	3.72821	5.25481	0.651259	5.18577	0.929521	1.5026	0.770123	3.23675
12	2.03251	0.980382	1.97662	2.14574	6.15049	1.18636	1.42894	0.788627	1.00905	1.83118	1.17978	1.32166	2.64936			4.24885	2.89059	4.39216	7.84972	0.677843	5.57617	0.955559	1.05647	1.39005	2.98024
12.5	1.82135	0.865696	2.9078	2.23811	5.28241	1.23583	1.40487	0.850644	1.07905	1.66083	1.51388	1.30174	2.5754			3.94325	2.32949	4.65274	3.64184	0.690485	4.54178	0.801362	0.959834	1.70559	3.49349
13	1.89473	1.06459	2.72939	1.77084	5.38039	1.3469	1.34918	0.78422	1.05466	1.6312	1.24696	1.19338	2.19808			4.29689	4.14104	5.96901	3.04814	0.740729	0	0.651696	0.795787	2.05714	3.53267
13.5	1.94038	0.896302	3.33785	2.27641	5.98603	1.2619	1.32568	0.647507	1.03547	1.70059	1.60993	1.34189	2.74825			5.00086	3.84965	6.12391	5.45947	0.571916	5.52756	0.723162	0.730799	0.992557	3.31067
14	2.04472	0.870398	2.07293	1.76513	5.94248	1.35151	1.39638	1.01083	1.08569	1.55512	1.34741	1.32057	2.80193			4.85015	6.48881	7.0315	3.80931	0.81143	2.77728	0.425837	0.866131	1.25233	3.6123
14.5	1.97045	0.885558	2.34271	2.13358	6.61402	1.24343	1.37437	0.710457	1.16925	1.51438	1.2119	1.36408	2.20005			4.55363	5.03318	6.91453	6.2287	0.630337	9.79773	0.997741	0.768962	1.45453	3.56557
15	2.15318	0.838386	2.1691	2.26275	5.83722	1.32255	1.29541	0.959677	1.1479	1.56473	0.877772	1.14463	2.05731			4.2775	5.7721	5.49587	4.06682	0.786936	4.42991	0.772314	0.728251	0.711601	3.46303
15.5	2.47431	0.876634	3.42892	1.629	5.15532	1.32864	1.28681	0.987637	1.0488	1.60989	1.10258	1.20807	2.29326			3.8549	3.70404	4.93484	2.9624	0.43621	3.6147	0.754712	0.918032	0.977999	3.41294
16	2.32299	0.837836	3.01516	1.70326	6.03266	1.20569	1.24048	0.811702	1.02752	1.53654	1.5384	1.17609	2.16567			4.21455	3.63665	3.48994	3.01294	0.785364	1.95024	0.322905	1.31929	2.16109	3.20621
16.5	2.54465	0.849227	2.50562	1.71305	6.26431	1.25772	1.37904	0.655127	1.02259	1.68985	1.79986	1.17334	2.24902			4.08601	4.04284	4.78761	6.51775	0.816929	3.80705	1.70665	0.861873	2.74757	3.18647
17	3.08087	0.681455	2.17236	1.87654	5.63247	1.24517	1.29801	0.70413	1.12818	1.45923	1.49566	1.30005	2.21703			3.91669	4.47604	3.84791	5.17422	0.407044	5.34683	0.603961	0.806835	2.78035	3.35385
17.5	2.77305	0.937587	2.63259	1.9657	6.41666	1.3093	1.43478	0.811915	1.13102	1.51255	1.0388	1.20569	2.23592			4.25138	3.96937	3.52048	3.8038	0.59627	6.93321	0.432057	0.756622	1.68048	3.3702
18	2.22317	0.743573	3.66124	1.50867	4.55248	1.23814	1.28074	0.860908	1.09185	1.55673	1.25685	1.12304	2.18928			3.72788	5.65835	5.12561	5.15257	0.611532	5.93632	0.510014	0.77195	2.97002	2.65915
18.5	2.44371	0.69364	2.92886	1.54845	7.93975	1.27845	1.37222	1.14158	1.09231	1.6831	1.31281	1.24372	2.23887			4.36127	5.91809	5.68335	4.6176	0.768131	2.86556	0.501487	0.758505	3.98467	3.20115
19	2.31707	0.710895	3.34038	1.54918	6.79205	1.1401	1.30792	0.911846	1.09614	1.57593	1.47355	1.138	2.25379			3.98734	8.98261	4.56922	3.14928	1.08197	5.36456	0.39483	0.710361	1.43661	3.78958
19.5	2.40794	0.914735	3.93751	1.38599	5.6493	1.14676	1.43827	0.965367	1.05966	1.75963	1.51965	1.28836	2.76522			4.57395	5.60146	3.00428	3.29242	1.47838	2.37016	0.615768	0.800642	1.16576	2.84352
20	2.31532	1.03302	3.00698	1.78087	6.05991	1.27079	1.33347	0.939404	0.991531	1.64916	1.43942	1.26615	2.25835			4.52679	6.97787	3.53768	2.81016	1.31366	2.98071	0.718555	0.509151	1.41038	3.35303
20.5	2.54961	0.888866	2.11747	1.77492	5.65885	1.16324	1.45469	1.04411	1.11347	1.57616	1.41024	1.28051	2.2068			4.35228	7.47387	3.21915	8.61997	1.19021	4.23848	0.744503	0.589729	1.94553	2.83156
21	2.29808	1.05015	1.99308	2.46709	5.6872	1.15913	1.36921	0.847847	1.08562	1.69385	1.52403	1.19043	2.30249			3.41365	4.80854	3.22813	4.13722	1.49666	4.61872	1.12863	0.592702	1.94572	3.00117
21.5	1.81107	0.98582	2.42636	2.18157	7.07155	1.18144	1.32699	1.05683	1.08836	1.56115	1.27727	1.1475	2.70498			3.87616	3.73118	3.9312	7.28256	1.13261	2.70689	1.0484	0.742175	1.44683	2.21873
22	2.15359	0.934798	4.27509	1.73331	5.35018	1.30896	1.43411	0.968378	1.05898	1.6356	1.20268	1.20828	2.29936			3.42995	3.25988	3.32622	4.45079	0.965328	3.89994	1.44314	0.578158	1.51448	2.83241
22.5	2.41912	0.896198	2.10086	2.35591	5.1339	1.24043	1.54848	1.10908	1.04753	1.4977	1.1972	1.19357	2.33158			3.67967	5.60743	3.36736	19.3202	1.42447	2.62219	0.84647	0.597625	1.21421	2.39878
23	2.51327	0.817753	1.75578	1.7806	4.51121	1.37599	1.40565	1.59116	1.00059	1.62642	1.16003	1.38369	2.33557			3.69165	3.381	3.50186	4.23312	0.951741	2.04869	0.574302	0.634182	0.886054	2.77389
23.5	2.50421	0.722956	3.12789	1.84347	5.61745	1.24432	1.53319	1.08468	0.926305	1.46285	1.32277	1.37379	2.44897			3.62311	3.95149	3.38649	6.66568	1.24875	2.7032	0.821987	0.785337	1.6247	2.79184
24	2.27809	0.929891	3.87544	1.73273	4.5753	1.20808	1.3947	1.10408	0.960626	1.42218	1.51544	1.19131	2.3328			3.57874	5.9989	4.07371	3.46692	1.10647	0.853304	0.852057	0.744536	2.1856	3.17066
24.5	2.46234	0.87326	3.54005	1.73806	5.35454	1.19044	1.40667	0.980679	1.01385	1.48501	1.11715	1.24285	2.17273			3.72355	3.92823	3.74198	10.8658	1.48777	7.89728	1.0142	0.825988	1.62584	3.38014
25	2.49298	0.652394	1.92925	1.72584	5.53426	1.20424	1.32757	1.18156	0.974496	1.54461	1.25992	1.21339	2.2574			3.65267	4.78396	2.83209	2.97026	1.53008	3.82181	0.676873	0.519332	1.77929	3.20259
25.5	2.34096	0.837979	2.60513	1.67018	5.05013	1.29741	1.54558	0.698899	1.05157	1.43557	1.0188	1.281	2.11933			3.64707	3.96937	2.23813	3.34684	1.70263	7.56354	0.541557	0.676388	2.02455	6.14209
26	2.31244	0.778723	3.52495	1.98693	5.46195	1.30093	1.39605	1.28678	1.02742	1.42761	1.35902	1.14185	2.1874			3.70697	3.55037	3.2079	2.87054	1.39256	2.45512	0.724336	0.548278	0.941895	3.76475
26.5	2.12528	0.706119	2.72424	2.26031	5.37108	1.22999	1.35777	1.42352	0.939094	1.38348	1.11813	1.28573	2.28354			3.66705	4.0925	4.27073	2.74492	1.68473	3.82667	0.58697	0.590297	0.589725	3.82979
27	2.48442	0.727623	2.47675	1.96709	6.80212	1.32323	1.60337	0.919197	0.987354	1.4299	1.25721	1.26129	2.37454			3.97462	2.16405	3.51997	5.91511	1.45588	5.25807	0.421869	0.45149	0.929983	3.17294
27.5	2.10454	0.740091	4.08646	2.15163	5.85842	1.22961	1.46891	0.955938	1.03439	1.4594	1.43596	1.39875	2.34834			3.6325	2.66884	3.09468	7.08136	1.6357	3.88337	0.720111	0.406955	1.58225	3.0047
28	2.26173	0.869744	5.46884	1.56602	5.74105	1.25036	1.52735	1.22154	1.07244	1.46139	0.68537	1.3755	2.72395			3.83936	3.8234	3.57268	4.38372	1.10742	6.87839	0.819826	0.450937	1.85762	3.41659
28.5	2.26035	0.838951	3.29953	1.84239	8.25144	1.16671	1.46695	1.29615	0.913739	1.54493	0.999138	1.38188	2.24802			2.88208	1.50509	2.93112	5.51495	1.38356	1.92203	0.92287	0.479316	1.47678	2.93576
29	2.38433	0.735742	2.69044	1.41319	5.73581	1.19418	1.50471	0.983165	1.17031	1.55906	0.990153	1.35415	2.52332			3.69521	2.85378	3.87918	4.39598	1.16883	2.40361	0.589785	0.296093	2.25778	2.66106
29.5	2.18584	0.807187	2.29765	1.88497	5.1973	1.30534	1.62269	0.822292	1.04015	1.38663	1.23564	1.30571	2.50798			4.10981	2.91973	4.16831	4.85079	1.18299	2.29316	0.572279	0.321879	3.22908	2.9354
30	2.22087	0.827026	1.89365	2.05253	6.23258	1.24927	1.33821	0.948028	1.04918	1.45284	1.14246	1.20477	2.32744			3.46022	2.47487	4.5122	8.15498	0.842995	6.32615	0.540181	0.561612	1.1153	3.38436
30.5	2.37861616200687*	0.7702443615575*	2.58795807203279*	2.00172921988603*	5.01571869360191*	1.24413635701452*	1.37711991024949*	1.05855865033925*	0.887230407943639*	1.47998436477656*	1.00165000691938*	1.12428362737386*	2.68796957086636*			3.23667865536884*	2.10918652423993*	3.48364753230248*	4.49584098056262*	1.1573959955424*	5.77194214295745*	0.233460736622655*	0.580421304250392*	1.13326195388191*	3.44851155788656*
31	2.21786815667603*	0.631916121510711*	2.48827050881491*	1.83427654418026*	5.36525586540141*	1.31510707521973*	1.30042306462351*	1.02603965035962*	0.866635195090434*	1.43660511713671*	1.09459329990739*	1.21782543785016*	2.59928069745985*			3.28629969046119*	2.159270336894*	2.76812116077102*	3.47478292601775*	1.17125587642713*	1.94221317230726*	0.607817929117443*	0.309793082841563*	0.881248966303676*	6.74531371406371*
31.5	2.41822471807387*	0.627403818221959*	2.30807615365596*	1.69405908167944*	5.11148628980614*	1.22955008983635*	1.36940304375862*	1.03191283440983*	0.918155232216226*	1.37075873320701*	1.01103907855097*	1.12702470582569*	2.34283616095807*			2.45059232316664*	2.60823664749384*	3.09663206947681*	3.11354391387878*	1.26051852781201*	4.03122805785704*	0.958568450312717*	0.29385971464854*	0.982694835435545*	3.10666763791764*
32	2.22455632017385*	0.701730942780896*	1.9983516524684*	1.6701185563634*	6.01484543284625*	1.1509068615549*	1.41670554807052*	0.827212249638338*	0.917327103028072*	1.41175021031075*	1.13115958228212*	1.29406995970655*	2.59565593989493*			4.27842236807348*	4.93438948233361*	2.25359034102944*	3.37828294211718*	1.25811998612536*	3.59661564387024*	0.644489228630994*	0.588406663180698*	0.88527058905457*	4.12394376456876*
32.5	2.44391190753315*	0.685753903239175*	2.01018229225202*	1.60600641907382*	5.2992955696571*	1.28587080561356*	1.46157556185813*	0.935552884125593*	0.837738687235209*	1.46335494506428*	1.05007504870182*	1.26192750389289*	2.35953829062082*			2.64055567973232*	3.05008381265407*	2.90177928404999*	3.84016485816402*	1.17488689953431*	3.10165355989327*	0.285983321751216*	0.410002240980055*	0.845720279598534*	4.49622426184926*
33	2.27337077110798*	0.806722363594815*	2.99584916121588*	1.63610401519617*	6.19037084473424*	1.38113982906813*	1.39512767954034*	0.972472951771634*	0.886326266897636*	1.40773943560242*	1.12389955183683*	1.33825229158975*	2.00702355621669*			2.47049898739493*	6.98178471651602*	4.01071806820589*	5.29505962155606*	0.654300031734552*	2.9653489678416*	0.966052814454482*	0.525704041234033*	0.970168612191958*	3.12464792152292*
33.5	2.94775707408671*	0.73646986827173*	3.20344354784329*	1.59148490207637*	4.57291727309775*	1.42895340649735*	1.41802139962569*	0.952179139754274*	0.880913422493909*	1.30336582174146*	1.2419335952054*	1.04136500088292*	2.36539439245297*			3.4204851021749*	5.94274445357436*	2.55651345054014*	5.33202391302015*	0.9604572727474*	3.16005476758882*	0.692029186935372*	0.839261970568462*	0.787781056589977*	2.91334013209013*
34	2.11342450146457*	0.715558344275185*	3.37977177879176*	1.55095958603524*	10.7427955987658*	1.40077332103142*	1.38204780053578*	0.868548666435746*	1.00782122011034*	1.43331662177205*	0.987396076177094*	1.1574615125295*	2.4093151561941*			2.90140139123131*	1.58061462612983*	2.76153357339547*	3.41498964269998*	0.978568107513709*	2.96819266956888*	0.835809589993051*	0.643116456263539*	0.851056328832946*	2.67911081973582*
34.5	2.01566197698175*	0.76742852937645*	3.211865105232*	1.46995480448025*	12.0072189555801*	1.44184310202496*	1.40824425560023*	1.19089121620245*	0.938666431963386*	1.40682171596577*	0.992186418846273*	1.12941662787151*	2.50453800817218*			3.0857767933947*	3.86736565324569*	2.95034950222411*	3.9726309688637*	0.595679672912715*	2.50473950287881*	0.739777623349548*	0.483670725330545*	0.667645957920943*	3.28823086635587*
35	2.15139090592616*	0.581723041408613*	2.36835322589104*	1.76662736621471*	9.13966350352215*	1.25748433933861*	1.43502786354986*	0.79636402534689*	1.01231392097167*	1.34360952728941*	0.842717082361958*	1.04859293981667*	2.39023104298868*			2.5996044405611*	2.68518652423993*	3.18493963143402*	3.40800249004519*	0.851054251322888*	0.517711697795254*	0.521737317581654*	0.534936879061776*	1.11401126402563*	4.68867764180264*
35.5	2.31992418674815*	0.714586165626707*	2.0612061408438*	1.90046505534814*	9.45636607090877*	1.28293594910892*	1.54794994521654*	1.04145866867703*	0.942595044826993*	1.4428762013205*	0.979401526522531*	1.16444062735781*	2.19973826425895*			2.66115999160114*	2.82288907148726*	3.31904257572548*	8.75132820298161*	0.582941571524513*	7.02362729953658*	0.318269631688673*	0.432225293194891*	1.46243003508039*	2.85659479409479*
36	2.26486112039046*	0.725287877203379*	5.72304015224737*	1.386552695356*	10.8444431507248*	1.38208371776817*	1.40661385785658*	0.934549399947024*	1.03808194078276*	1.34260683361233*	1.12684827387986*	1.16954152151927*	2.27002090119947*			2.68795507961988*	4.01266721446179*	2.56043211184071*	3.32013180066759*	1.15183875895763*	5.12322707484904*	0.383905489923558*	0.397228654664973*	1.57420416264069*	3.34429632867133*
36.5	2.17350896502252*	0.602162032356894*	4.062255089273*	1.80389729481889*	5.3338766955813*	0*	1.55558817516029*	1.38899019947432*	0.976172282876129*	1.46579370002464*	0.807470805522733*	1.15009310837494*	2.2272770067976*			2.5891532725093*	1.81546096959737*	0*	6.85027530025437*	0.949468261758389*	1.47126456958292*	1.06102154273801*	0.197101665795174*	1.36373488627164*	2.70759275446775*
37	0*	0.546960876587537*	2.8322206987495*	0*	6.68254060662514*		0*	0.972427107316775*	0.952664615680046*	1.42499766321389*	0.949435271825333*	1.26281444143002*	2.16345302879093*			2.14041682753202*	2.39034346754314*	2.78193179411142*	7.74140022109884*	1.10020000147603*	4.09303468613959*	1.02811674774149*	0.164712034062897*	1.06133845176229*	2.36810411810412*
37.5		0.631985839501439*	0*		5.38801886243232*		1.50074704719766*	0.985604841174433*	0*	1.36290713187121*	1.14815997615474*	1.30833319955693*	2.51448961530495*			3.16700871720887*	3.61012325390304*	2.5538021605592*	3.57540436401885*	0.615000848714751*	3.97117680101109*	0.543988881167477*	0.216911929483828*	0.657274175436764*	3.11658653846154*
38		0.635816455769745*			0*		1.37169398849809*	0.939464944273518*		0*	0.958111114659513*	1.24395598221309*	2.34068013632854*			2.84771638930093*	3.12603451109285*	1.92215632281296*	4.69477627158665*	0*	0*	0.244718554551772*	0.301038320758945*	0.829916694957303*	3.34100621600622*
38.5		0*					0*	1.07574522708287*			0*	1.24764018429037*	2.31771706178093*			0*	2.69651273623665*	2.84600720186401*	0*			0*	0*	1.81848292551293*	2.25912975912976*
								0*				0*	0*				0*	0*						0*	0*
