# Supplementary material for: Microtubules restrict F-actin polymerization to the immune synapse via GEF-H1 to maintain polarity in lymphocytes
Source: eLife journal article supplement (doi:10.7554/elife.78330), 2022-09-16
Supplement: supp [file Figure5L.xlsx]

## Sheet: Sheet 1
Actin profile at the immune synapse, normalized to the max
Distance from synapse center (µm)	DMSO														Nocodazole
-5	0.009226	0.00069066	2.4336e-05	8.3799e-05	0.0111383	0	0.00130169	0.0129787	0.0223955	0.00100232	0.0227777	0.0001009			0.100719	0.134581	0.0387885	0.224055	0.0763489	0.113264	0.00028684	0.0458545
-4.96078	0.0106234	0.00100046	3.3027e-05	7.2558e-05	0.0125438	0	0.00228765	0.0138764	0.0231087	0.00119603	0.0240074	0.00022024			0.102878	0.144472	0.042508	0.238938	0.0832512	0.119412	0.00043005	0.0549648
-4.92157	0.0125494	0.00150739	8.7783e-05	0.00010219	0.013994	0	0.00335385	0.0148611	0.0227959	0.00144935	0.02537	0.00036109			0.105755	0.154009	0.0469357	0.255028	0.0949431	0.125745	0.0010033	0.064986
-4.88235	0.0145665	0.00240056	0.00016687	0.00011241	0.0152482	0	0.00454684	0.015928	0.0223425	0.00173611	0.0271224	0.00056597			0.108873	0.163546	0.0515409	0.275946	0.0974787	0.132638	0.00143334	0.0759183
-4.84314	0.0171494	0.00374567	0.00029029	0.00015329	0.016261	4.5796e-05	0.00569067	0.0171577	0.0221861	0.00212111	0.0290982	0.0007985			0.11223	0.173437	0.0565	0.294047	0.0988872	0.140835	0.00272348	0.0874582
-4.80392	0.0200398	0.00522088	0.00040328	0.00021154	0.0178634	0.00018505	0.00717092	0.018607	0.0224324	0.00260493	0.0308827	0.00105254			0.115827	0.183327	0.0616366	0.317779	0.100296	0.149963	0.00401362	0.0996049
-4.76471	0.0228141	0.0074605	0.0005858	0.00030249	0.0200178	0.00041684	0.00936023	0.0202635	0.0229231	0.00312433	0.0328417	0.00132964			0.119424	0.193218	0.067127	0.342719	0.101845	0.15965	0.00587744	0.112663
-4.72549	0.0267182	0.010022	0.00078396	0.00040469	0.0222117	0.00089816	0.0119998	0.0222683	0.0231992	0.00371703	0.0343387	0.00161953			0.123501	0.202755	0.072618	0.372083	0.103254	0.171758	0.00860092	0.126936
-4.68627	0.031059	0.0137891	0.00099516	0.00045681	0.0253038	0.00145051	0.0152217	0.0245927	0.0239408	0.00427445	0.0356556	0.0019166			0.128537	0.212292	0.0784628	0.411102	0.105367	0.187034	0.0111812	0.141512
-4.64706	0.0356832	0.0182362	0.00142451	0.00055798	0.0282579	0.00237764	0.0189689	0.0276593	0.0245443	0.00494377	0.0368413	0.00228179			0.133813	0.221124	0.0841302	0.468222	0.107762	0.195604	0.0144784	0.156696
-4.60784	0.0415124	0.0235804	0.00171481	0.00059477	0.030328	0.00318141	0.0226721	0.0309116	0.0253438	0.00574629	0.0388107	0.00280525			0.139568	0.229954	0.0903294	0.488335	0.110579	0.203242	0.0180619	0.17188
-4.56863	0.0472923	0.0314245	0.00235797	0.00056104	0.0326387	0.0041263	0.0261269	0.0344706	0.0263859	0.0065324	0.0418448	0.00352128			0.145563	0.239138	0.0968826	0.504023	0.114523	0.209948	0.0219323	0.187671
-4.52941	0.0531726	0.0387496	0.00309499	0.00055798	0.0353817	0.0051039	0.0281609	0.0377431	0.0278373	0.00738114	0.0459197	0.00442478			0.152038	0.249735	0.104145	0.518906	0.119876	0.217958	0.0260896	0.202855
-4.4902	0.0583682	0.0469423	0.00389634	0.00070105	0.0381937	0.00639739	0.0302415	0.0400636	0.03026	0.00806507	0.0514724	0.00542098			0.158753	0.260332	0.111583	0.531375	0.126638	0.227645	0.0303901	0.216824
-4.45098	0.062866	0.0509187	0.0047507	0.00093201	0.0419525	0.00749182	0.0332202	0.0424876	0.0337459	0.00853369	0.0589385	0.00628965			0.165468	0.270929	0.119199	0.539421	0.134103	0.236587	0.0351206	0.230792
-4.41176	0.0662823	0.0544886	0.00557203	0.00115274	0.0463648	0.00870214	0.0368923	0.0465012	0.0385283	0.00896977	0.0683884	0.0071952			0.172901	0.281172	0.126461	0.541432	0.142274	0.251118	0.0398511	0.245369
-4.37255	0.070244	0.0594882	0.00628907	0.00145524	0.0477378	0.00990311	0.0407611	0.0527153	0.0443175	0.00940311	0.0806635	0.00802955			0.180576	0.292123	0.1339	0.541432	0.151712	0.261736	0.0447248	0.260856
-4.33333	0.0767272	0.0657002	0.00719558	0.00197132	0.0478981	0.0114144	0.0443194	0.0638495	0.0504619	0.0099137	0.0911021	0.00890641			0.18825	0.303426	0.141693	0.540627	0.162136	0.267139	0.0497421	0.276648
-4.29412	0.0851654	0.0752743	0.00803603	0.0024782	0.0474141	0.0129415	0.048328	0.074971	0.0563703	0.0105985	0.100997	0.0100301			0.195683	0.315436	0.149132	0.539019	0.173405	0.272541	0.0551891	0.292135
-4.2549	0.095824	0.086349	0.00906074	0.00287573	0.0480331	0.0143051	0.0520778	0.0790452	0.0615267	0.0111745	0.110521	0.0114935			0.203117	0.328153	0.156217	0.537409	0.184956	0.277198	0.0607797	0.306711
-4.21569	0.107381	0.0981024	0.0104557	0.00326918	0.0497592	0.0150079	0.0559544	0.082733	0.0667588	0.0118052	0.118691	0.0128359			0.210791	0.341929	0.162416	0.537812	0.197352	0.281855	0.066944	0.320072
-4.17647	0.119305	0.110234	0.0116455	0.00343677	0.0525377	0.015879	0.0590624	0.0854992	0.0710903	0.0123921	0.12664	0.014225			0.218945	0.355705	0.168969	0.539822	0.213551	0.286699	0.0729646	0.333434
-4.13725	0.129662	0.121821	0.0128789	0.00363605	0.0568993	0.0167856	0.0619064	0.0877288	0.075338	0.0132175	0.136581	0.0153743			0.228777	0.370541	0.176231	0.541029	0.233836	0.291915	0.0788416	0.346189
-4.09804	0.136863	0.132634	0.0139679	0.00415417	0.0628957	0.0176903	0.0660082	0.0896175	0.0795048	0.0141328	0.146558	0.0166066			0.240048	0.386082	0.18367	0.542236	0.258065	0.297317	0.0847191	0.358032
-4.05882	0.140587	0.144326	0.0147388	0.0046631	0.0706629	0.0188922	0.0699805	0.0921072	0.0844289	0.0151062	0.157704	0.0179644			0.253477	0.401625	0.191994	0.544649	0.282434	0.30123	0.0908829	0.368964
-4.01961	0.14068	0.160977	0.0154254	0.00514341	0.0807621	0.0207988	0.0746722	0.0962129	0.0903551	0.0156597	0.170137	0.0194308			0.269065	0.417873	0.20085	0.54827	0.301451	0.304769	0.0974772	0.378378
-3.98039	0.139527	0.174706	0.0160981	0.00545612	0.0943207	0.0223727	0.0809788	0.100951	0.0971073	0.015844	0.183272	0.0211968			0.284653	0.433768	0.210414	0.551086	0.313565	0.30775	0.104644	0.386881
-3.94118	0.139277	0.187454	0.0173158	0.0059119	0.110597	0.0242774	0.0878832	0.106962	0.104246	0.0158571	0.196561	0.023514			0.29976	0.45143	0.220687	0.5535	0.319341	0.309985	0.112815	0.395384
-3.90196	0.13986	0.198884	0.0188524	0.00642798	0.127831	0.0256961	0.0944848	0.111736	0.112644	0.0158826	0.21253	0.0262142			0.313669	0.470152	0.231668	0.557924	0.321595	0.312407	0.121273	0.40328
-3.86275	0.142489	0.209976	0.0204951	0.00728641	0.142616	0.0275448	0.100196	0.116901	0.120839	0.0161189	0.22875	0.0288233			0.327338	0.489932	0.243889	0.563556	0.326525	0.314642	0.130304	0.410264
-3.82353	0.146884	0.220685	0.0224559	0.0081479	0.152679	0.0292663	0.105235	0.1236	0.129745	0.0168153	0.247313	0.031165			0.339808	0.511833	0.257705	0.569188	0.336949	0.316692	0.140052	0.415427
-3.78431	0.15421	0.230494	0.0249242	0.00877742	0.163608	0.0315337	0.108304	0.128129	0.139397	0.0181551	0.267164	0.0338673			0.352038	0.533027	0.27152	0.575221	0.351881	0.318554	0.150516	0.419982
-3.7451	0.163478	0.235452	0.0274638	0.00957759	0.1768	0.0335524	0.112714	0.127178	0.148302	0.0192359	0.289093	0.0373958			0.36307	0.559519	0.285158	0.580852	0.366108	0.318927	0.162557	0.423322
-3.70588	0.172269	0.240776	0.0301095	0.0105913	0.191772	0.0358123	0.119038	0.125217	0.156954	0.0202045	0.314725	0.041334			0.372901	0.588838	0.299504	0.586886	0.38273	0.320231	0.173452	0.424537
-3.66667	0.179545	0.252744	0.0329333	0.0115193	0.204522	0.0377629	0.125707	0.12451	0.165142	0.0209136	0.342454	0.0457541			0.380576	0.619215	0.311902	0.590909	0.400479	0.321163	0.186927	0.423929
-3.62745	0.182495	0.267126	0.0367558	0.012902	0.214841	0.0399844	0.130425	0.124949	0.172535	0.0221869	0.371059	0.0506388			0.38729	0.647474	0.326249	0.59453	0.422595	0.321349	0.204129	0.423018
-3.58824	0.182547	0.278894	0.0421722	0.0146392	0.223282	0.0419312	0.13537	0.126565	0.177989	0.0239799	0.393006	0.0558345			0.392806	0.669021	0.341126	0.596943	0.443584	0.321163	0.227637	0.422411
-3.54902	0.182642	0.287124	0.0457617	0.0166034	0.231188	0.0456472	0.13911	0.12954	0.182924	0.026798	0.410159	0.0622476			0.397122	0.684916	0.357244	0.59815	0.461192	0.321908	0.261611	0.422107
-3.5098	0.185335	0.300512	0.0472054	0.0191531	0.238291	0.0513455	0.145178	0.135724	0.188084	0.0316329	0.429065	0.0691723			0.400719	0.699752	0.374425	0.598954	0.480772	0.323211	0.290424	0.422411
-3.47059	0.189352	0.316746	0.0485656	0.0217591	0.249517	0.0583439	0.153146	0.144253	0.19124	0.0368178	0.455927	0.0752638			0.404077	0.719533	0.389302	0.600965	0.500775	0.324516	0.30691	0.423322
-3.43137	0.195496	0.329749	0.0499492	0.0244222	0.263676	0.0662441	0.157716	0.155064	0.195766	0.0407219	0.490807	0.0800127			0.408394	0.742494	0.403117	0.603781	0.523595	0.326937	0.323108	0.42484
-3.39216	0.202894	0.34306	0.0518761	0.0267747	0.271899	0.0751126	0.15848	0.16557	0.204689	0.0449081	0.526486	0.0849441			0.411271	0.767927	0.414453	0.606597	0.546978	0.331222	0.341313	0.427877
-3.35294	0.209938	0.355165	0.0552631	0.0289821	0.275568	0.082568	0.159	0.176377	0.217526	0.0497196	0.55477	0.0916322			0.41223	0.792652	0.423131	0.606597	0.57332	0.339046	0.364392	0.431522
-3.31373	0.217625	0.371696	0.066389	0.0310812	0.278217	0.0851905	0.161127	0.184256	0.231786	0.0554702	0.571236	0.100268			0.410791	0.815613	0.431633	0.606194	0.609945	0.349292	0.381308	0.434255
-3.27451	0.225309	0.379633	0.0803255	0.033031	0.285019	0.0852419	0.163614	0.19023	0.245006	0.0624782	0.579631	0.110236			0.410552	0.838926	0.438718	0.606194	0.65305	0.361587	0.390195	0.435772
-3.23529	0.232521	0.380562	0.0846521	0.0344107	0.298088	0.0832624	0.164595	0.199198	0.25591	0.0714656	0.588911	0.121834			0.41271	0.86012	0.446688	0.606194	0.702212	0.375373	0.395929	0.43638
-3.19608	0.235829	0.384105	0.0884754	0.0354081	0.317678	0.0789884	0.165508	0.211509	0.268801	0.0837525	0.604948	0.136163			0.417746	0.88202	0.4582	0.606194	0.748838	0.39158	0.398653	0.437291
-3.15686	0.235364	0.384952	0.093041	0.0364075	0.334124	0.0756014	0.167402	0.228442	0.285499	0.0990923	0.623156	0.15531			0.42566	0.903568	0.469713	0.605792	0.785886	0.4076	0.40195	0.438505
-3.11765	0.233461	0.398969	0.09866	0.0385045	0.348258	0.0740733	0.16673	0.247697	0.304601	0.121505	0.640899	0.175834			0.430935	0.930413	0.479277	0.606999	0.806593	0.422131	0.40281	0.440328
-3.07843	0.233993	0.421449	0.10393	0.0422274	0.366587	0.075435	0.169726	0.27088	0.321352	0.148436	0.655818	0.194722			0.434053	0.955846	0.489019	0.609412	0.812086	0.438152	0.405246	0.442454
-3.03922	0.242024	0.470071	0.109389	0.0465063	0.391498	0.0827568	0.186449	0.298026	0.334089	0.172544	0.67165	0.216513			0.435491	0.972094	0.497343	0.613435	0.807297	0.455291	0.408974	0.445187
-3	0.255343	0.522135	0.115324	0.0517539	0.418892	0.0949057	0.208743	0.325408	0.341947	0.197816	0.682272	0.242238			0.43693	0.983751	0.504428	0.619067	0.796309	0.471125	0.410981	0.447616
-2.96078	0.273195	0.511466	0.121645	0.0580756	0.447094	0.112347	0.223191	0.358988	0.347221	0.224906	0.690237	0.270139			0.43765	0.991168	0.515409	0.6251	0.791097	0.489195	0.415138	0.450349
-2.92157	0.297209	0.494068	0.1276	0.0646396	0.471935	0.134142	0.23022	0.399056	0.355385	0.25172	0.690047	0.299992			0.439329	0.997174	0.529047	0.631939	0.786308	0.505216	0.419725	0.45369
-2.88235	0.329301	0.469471	0.133755	0.0712944	0.49326	0.158189	0.237158	0.439322	0.365885	0.280372	0.687576	0.329189			0.440768	1	0.550124	0.64119	0.796309	0.521609	0.423165	0.456119
-2.84314	0.367203	0.445336	0.139987	0.0781669	0.518464	0.186478	0.254284	0.474319	0.380706	0.309032	0.677531	0.360291			0.443885	0.991875	0.576514	0.65004	0.813495	0.538375	0.431479	0.457637
-2.80392	0.41048	0.4209	0.148111	0.0853593	0.55007	0.216077	0.280986	0.507138	0.398758	0.336228	0.658643	0.398743			0.45084	0.977392	0.606624	0.657683	0.837583	0.565201	0.4418	0.458245
-2.76471	0.453338	0.398949	0.157379	0.091029	0.585646	0.248487	0.302353	0.53105	0.415231	0.359361	0.639598	0.447966			0.463549	0.967502	0.637443	0.665325	0.865615	0.596684	0.453842	0.457941
-2.72549	0.490856	0.38058	0.168541	0.0948327	0.618444	0.280667	0.314157	0.549044	0.427039	0.372792	0.623559	0.503082			0.482973	0.959732	0.662593	0.676186	0.891534	0.627235	0.469753	0.457334
-2.68627	0.526317	0.36417	0.180802	0.0979639	0.650703	0.312335	0.317886	0.567181	0.433679	0.381247	0.62213	0.546037			0.509113	0.956552	0.687921	0.689863	0.918298	0.652198	0.485092	0.456726
-2.64706	0.551434	0.35293	0.192262	0.101418	0.67288	0.338138	0.326726	0.589602	0.437125	0.391488	0.633315	0.576086			0.542206	0.957612	0.718562	0.704746	0.937597	0.677533	0.498136	0.455208
-2.60784	0.564649	0.352983	0.201857	0.105656	0.682041	0.363853	0.347102	0.615677	0.445517	0.406013	0.63909	0.594848			0.582014	0.955493	0.747786	0.720032	0.954219	0.703987	0.508744	0.454904
-2.56863	0.569664	0.364771	0.210007	0.1124	0.687586	0.387059	0.377106	0.641034	0.465188	0.426056	0.64393	0.612473			0.628777	0.95196	0.776479	0.733708	0.971545	0.728204	0.513188	0.456726
-2.52941	0.562636	0.379712	0.217641	0.122129	0.69225	0.411147	0.405872	0.657518	0.496889	0.456691	0.646416	0.626964			0.682014	0.943129	0.80836	0.743764	0.983237	0.76006	0.513762	0.461585
-2.4902	0.553612	0.387775	0.224424	0.135399	0.69598	0.435126	0.442744	0.669458	0.537255	0.494513	0.66947	0.636083			0.73765	0.929706	0.849097	0.752615	0.992253	0.798436	0.511755	0.46948
-2.45098	0.557935	0.391865	0.230896	0.150919	0.695969	0.463932	0.491489	0.676033	0.585696	0.534914	0.708759	0.643756			0.792326	0.920876	0.899575	0.758245	0.997746	0.847802	0.507024	0.477679
-2.41176	0.581431	0.393733	0.237691	0.169477	0.698523	0.497686	0.545836	0.683079	0.634586	0.571918	0.757866	0.652347			0.834532	0.914518	0.94899	0.766693	1	0.897541	0.505591	0.484057
-2.37255	0.631406	0.399553	0.247918	0.188714	0.714573	0.550026	0.58638	0.687156	0.680061	0.597301	0.80864	0.663548			0.869784	0.906747	0.985299	0.777152	0.997606	0.942809	0.511468	0.489219
-2.33333	0.691842	0.40298	0.259416	0.206786	0.736669	0.616355	0.612934	0.680759	0.719158	0.617669	0.848127	0.677051			0.897602	0.895796	1	0.788817	0.989858	0.972988	0.521216	0.493167
-2.29412	0.754555	0.405949	0.276818	0.22702	0.76537	0.697563	0.628678	0.675123	0.746941	0.633243	0.870853	0.69789			0.92446	0.880607	0.998583	0.801689	0.988449	0.99199	0.535264	0.498026
-2.2549	0.807685	0.408144	0.299709	0.255244	0.797392	0.781976	0.653876	0.677601	0.77421	0.652542	0.883627	0.72604			0.950599	0.862592	0.986716	0.816573	0.983941	0.993852	0.552179	0.506832
-2.21569	0.838448	0.4195	0.323598	0.290605	0.828708	0.86344	0.680355	0.69774	0.801744	0.673462	0.884713	0.756298			0.971703	0.84493	0.971307	0.829847	0.985209	0.984724	0.568091	0.520498
-2.17647	0.856305	0.433777	0.341928	0.31829	0.860124	0.921526	0.71395	0.737248	0.832293	0.70186	0.885719	0.785665			0.989688	0.828682	0.958909	0.838696	0.985068	0.97895	0.582855	0.542666
-2.13725	0.864464	0.46082	0.362042	0.334928	0.883805	0.960888	0.744212	0.784752	0.866669	0.73552	0.883942	0.805718			0.99952	0.815613	0.955898	0.846742	0.98197	0.981371	0.597477	0.574552
-2.09804	0.872633	0.489004	0.396068	0.350463	0.902039	0.970282	0.770249	0.837678	0.899313	0.782435	0.891965	0.818793			1	0.806781	0.950408	0.852776	0.973799	0.991804	0.612672	0.615548
-2.05882	0.892903	0.523128	0.447575	0.377203	0.923289	0.959511	0.78634	0.890124	0.930094	0.841064	0.907153	0.827786			0.994005	0.80219	0.940843	0.861223	0.961966	1	0.626434	0.665047
-2.01961	0.927801	0.55624	0.502588	0.420387	0.96067	0.939879	0.79437	0.938356	0.95686	0.902692	0.931259	0.845995			0.978657	0.797244	0.922069	0.872887	0.952529	0.986401	0.649513	0.725174
-1.98039	0.968004	0.592287	0.554332	0.473289	0.994626	0.925093	0.812001	0.973793	0.981423	0.955825	0.959775	0.875482			0.957554	0.791593	0.894261	0.88576	0.941682	0.949889	0.674312	0.794109
-1.94118	0.996442	0.639136	0.592102	0.541398	1	0.919853	0.839416	0.995947	0.995467	0.990791	0.972637	0.915179			0.934053	0.781349	0.859547	0.901046	0.932526	0.908718	0.696674	0.85788
-1.90196	0.999999	0.692232	0.623332	0.613285	0.971077	0.925901	0.870711	1	0.998301	0.999999	0.966865	0.956726			0.908633	0.768279	0.822352	0.91432	0.914073	0.879099	0.709433	0.897358
-1.86275	0.991508	0.748381	0.651315	0.679179	0.925349	0.942197	0.906149	0.99324	1	0.992528	0.96014	0.987914			0.883693	0.75521	0.779844	0.929605	0.893647	0.85842	0.714449	0.907379
-1.82353	0.9807	0.771344	0.685047	0.742516	0.876737	0.961771	0.947319	0.980046	0.995184	0.976103	0.949346	1			0.860432	0.7432	0.743004	0.944086	0.865615	0.847057	0.706135	0.898269
-1.78431	0.960637	0.786238	0.720374	0.795889	0.824096	0.983377	0.972913	0.958889	0.977051	0.960666	0.945613	0.995054			0.83765	0.73331	0.707403	0.957763	0.829413	0.844076	0.706422	0.889766
-1.7451	0.949421	0.808991	0.763851	0.843522	0.768187	0.991979	0.982379	0.922916	0.942767	0.952394	0.94812	0.97895			0.816547	0.731543	0.67871	0.969831	0.789125	0.849851	0.713876	0.89675
-1.70588	0.925473	0.851978	0.802032	0.878933	0.703542	0.983906	0.986287	0.873863	0.894479	0.951511	0.960472	0.958985			0.795204	0.738961	0.655685	0.9823	0.745739	0.857862	0.717317	0.924688
-1.66667	0.895732	0.898696	0.838124	0.906594	0.637909	0.960082	0.99506	0.826535	0.845153	0.960955	0.978717	0.938297			0.768825	0.748852	0.640808	0.989943	0.705451	0.855253	0.71832	0.962344
-1.62745	0.864108	0.947397	0.859428	0.94027	0.561632	0.944376	0.999997	0.782661	0.799282	0.972147	0.998921	0.923688			0.739568	0.749205	0.638151	0.987529	0.665869	0.846311	0.706852	0.989674
-1.58824	0.812085	0.985681	0.881458	0.980912	0.486874	0.952764	0.990901	0.737951	0.763554	0.977455	1	0.920806			0.707674	0.739668	0.637796	0.979485	0.631779	0.834948	0.700688	1
-1.54902	0.75646	1	0.907211	1	0.419043	0.972871	0.967044	0.696327	0.733602	0.971067	0.985151	0.924859			0.676499	0.726598	0.638859	0.977072	0.600366	0.823585	0.706709	0.991497
-1.5098	0.688947	0.987779	0.93984	0.988148	0.368313	0.987844	0.949216	0.65366	0.695037	0.953002	0.955774	0.923195			0.645324	0.714942	0.639745	0.979082	0.575292	0.805328	0.723337	0.968418
-1.47059	0.614397	0.960784	0.97221	0.974593	0.333798	0.989505	0.938143	0.617313	0.656797	0.927341	0.924918	0.912392			0.615347	0.703638	0.628055	0.984714	0.556135	0.784091	0.764335	0.935317
-1.43137	0.553813	0.921746	0.998223	0.976325	0.296474	0.974174	0.942027	0.576207	0.611012	0.899398	0.903737	0.889598			0.58777	0.694808	0.607864	0.992356	0.541062	0.758756	0.824111	0.901305
-1.39216	0.493995	0.865512	1	0.98809	0.251962	0.964088	0.945541	0.526647	0.569889	0.866184	0.888431	0.858505			0.564029	0.687743	0.582359	0.999195	0.528807	0.728018	0.890338	0.87519
-1.35294	0.443284	0.813626	0.994122	0.992466	0.214047	0.961074	0.955486	0.473091	0.524091	0.819819	0.880214	0.823627			0.544124	0.683151	0.55774	1	0.513735	0.687966	0.951405	0.865775
-1.31373	0.403396	0.796079	0.990152	0.960721	0.182525	0.976506	0.964862	0.427344	0.473861	0.765888	0.884064	0.79283			0.528297	0.679972	0.538434	0.995575	0.499225	0.651453	0.986525	0.867902
-1.27451	0.37304	0.811697	0.995521	0.9164	0.164232	0.994341	0.980723	0.387906	0.427632	0.718034	0.875382	0.77012			0.513909	0.67114	0.522317	0.982702	0.482603	0.626118	1	0.867597
-1.23529	0.347401	0.834986	0.987654	0.868212	0.157274	0.999999	0.986908	0.351302	0.379816	0.679918	0.861436	0.753987			0.501919	0.657718	0.50797	0.969026	0.469644	0.614754	0.989823	0.858791
-1.19608	0.327451	0.852234	0.982473	0.824158	0.153909	0.985946	0.97502	0.316695	0.34162	0.647411	0.838246	0.740496			0.492086	0.643588	0.492916	0.95173	0.457952	0.603204	0.952839	0.841785
-1.15686	0.309273	0.859547	0.975111	0.782832	0.145966	0.946682	0.94011	0.286461	0.306897	0.615731	0.812202	0.720776			0.485612	0.634051	0.474141	0.935237	0.448936	0.583272	0.883888	0.819617
-1.11765	0.288715	0.838008	0.97232	0.747571	0.140678	0.90207	0.90536	0.26279	0.281929	0.582664	0.78686	0.70226			0.482734	0.633345	0.454127	0.924778	0.443161	0.565201	0.804903	0.797145
-1.07843	0.263974	0.800562	0.959188	0.708582	0.136425	0.867523	0.8706	0.238002	0.259725	0.541792	0.768337	0.678584			0.483933	0.63829	0.436592	0.916734	0.440344	0.549926	0.734518	0.77194
-1.03922	0.238486	0.752732	0.940644	0.675335	0.134982	0.849086	0.847931	0.209916	0.251657	0.496644	0.758704	0.649079			0.486331	0.632286	0.422954	0.905873	0.443302	0.534277	0.691084	0.74795
-1	0.214847	0.700005	0.916158	0.643799	0.13407	0.84484	0.8304	0.184618	0.253143	0.438556	0.750551	0.610353			0.490887	0.619922	0.410025	0.894207	0.446401	0.526453	0.664421	0.733374
-0.960784	0.190203	0.66766	0.890165	0.618563	0.131253	0.828907	0.8122	0.164206	0.263341	0.373406	0.727789	0.5685			0.495923	0.605086	0.395679	0.884151	0.44781	0.518443	0.649083	0.726085
-0.921569	0.169954	0.652666	0.870861	0.585763	0.127206	0.787314	0.797732	0.152235	0.271193	0.310173	0.690099	0.529512			0.5	0.587424	0.380801	0.876508	0.445697	0.508197	0.640482	0.720012
-0.882353	0.153739	0.649592	0.847946	0.544132	0.121634	0.722699	0.777575	0.140382	0.274629	0.255541	0.664438	0.500955			0.500959	0.572589	0.365037	0.866452	0.441893	0.498137	0.646359	0.713939
-0.843137	0.141823	0.629441	0.81976	0.490532	0.115361	0.642857	0.747758	0.132569	0.268961	0.208748	0.662944	0.483325			0.497842	0.560226	0.351045	0.850362	0.437808	0.478391	0.659117	0.709079
-0.803922	0.13467	0.602398	0.785566	0.42756	0.110309	0.566026	0.6794	0.123833	0.237883	0.17566	0.675386	0.472657			0.492086	0.554574	0.340418	0.829847	0.430483	0.456781	0.667574	0.70088
-0.764706	0.126864	0.588638	0.753616	0.37052	0.106011	0.482285	0.628668	0.117053	0.199403	0.157282	0.693444	0.462198			0.483693	0.558813	0.334573	0.810136	0.419496	0.436103	0.680333	0.687519
-0.72549	0.116065	0.589808	0.72982	0.332338	0.101905	0.408372	0.585461	0.106716	0.155724	0.148931	0.689551	0.434362			0.47434	0.56835	0.330676	0.797265	0.404705	0.416729	0.670442	0.672943
-0.686275	0.103457	0.608608	0.711472	0.328981	0.09832	0.345102	0.543062	0.0943078	0.122316	0.142929	0.672896	0.391119			0.465707	0.578594	0.328197	0.788013	0.390759	0.402012	0.656823	0.663528
-0.647059	0.0897217	0.625981	0.698607	0.338123	0.0947967	0.29921	0.498641	0.0796449	0.102106	0.13504	0.645334	0.3321			0.453957	0.580007	0.326072	0.777554	0.377236	0.388413	0.631737	0.655329
-0.607843	0.0762562	0.64961	0.655192	0.353143	0.0894	0.26361	0.465998	0.0703578	0.0919368	0.123555	0.603156	0.277249			0.441247	0.572943	0.324478	0.765889	0.363291	0.379844	0.588303	0.640146
-0.568627	0.0630267	0.677834	0.603554	0.356337	0.0829987	0.237952	0.433956	0.0616565	0.091451	0.114154	0.560397	0.22834			0.426619	0.563758	0.324655	0.754223	0.349486	0.370715	0.548882	0.614941
-0.529412	0.0540042	0.70147	0.553094	0.348368	0.0759926	0.214551	0.421306	0.0556305	0.0934297	0.111241	0.521552	0.193725			0.408633	0.563405	0.323769	0.740949	0.331737	0.362891	0.524656	0.587002
-0.490196	0.0459358	0.724731	0.531146	0.340039	0.0728325	0.196565	0.416301	0.0532418	0.0952128	0.110082	0.489648	0.166332			0.389688	0.565525	0.322352	0.725663	0.313565	0.352831	0.519639	0.563012
-0.45098	0.0410339	0.748392	0.514447	0.329895	0.0691468	0.179796	0.413136	0.054671	0.100531	0.111803	0.468186	0.141063			0.373381	0.565525	0.319696	0.711182	0.298493	0.337742	0.533974	0.544488
-0.411765	0.0359786	0.768305	0.504806	0.329763	0.0638669	0.166462	0.400691	0.0560913	0.108112	0.123804	0.450312	0.125032			0.361631	0.563758	0.316684	0.697908	0.284124	0.326565	0.553326	0.532645
-0.372549	0.0324062	0.778549	0.497036	0.333109	0.0595276	0.150688	0.393368	0.0564448	0.118314	0.140909	0.439658	0.114736			0.353957	0.561992	0.315267	0.686645	0.271588	0.318741	0.583142	0.524749
-0.333333	0.0278434	0.801369	0.47656	0.325757	0.0550909	0.152749	0.386942	0.0566064	0.132529	0.162492	0.426604	0.109886			0.345804	0.55846	0.315267	0.677796	0.258628	0.319113	0.618836	0.520194
-0.294118	0.0250078	0.809747	0.46677	0.307075	0.0515067	0.155665	0.371871	0.0557087	0.151679	0.180016	0.414501	0.103357			0.340048	0.5574	0.316684	0.674577	0.250739	0.325447	0.645786	0.517764
-0.254902	0.022502	0.81073	0.45281	0.292044	0.0487566	0.144713	0.350948	0.0575924	0.178514	0.186616	0.396796	0.101319			0.336451	0.560579	0.314559	0.674176	0.24426	0.337929	0.664564	0.514728
-0.215686	0.020366	0.818062	0.454164	0.286216	0.0458766	0.119282	0.311377	0.0649529	0.200637	0.177545	0.373319	0.0977129			0.335012	0.561639	0.311902	0.676186	0.238484	0.349851	0.670728	0.517158
-0.176471	0.0225651	0.835304	0.458633	0.291968	0.0466215	0.0906897	0.272914	0.0737628	0.224907	0.159993	0.356287	0.0929076			0.333813	0.564111	0.306766	0.677393	0.233132	0.344448	0.668291	0.521409
-0.137255	0.0243407	0.867765	0.462347	0.295115	0.0479519	0.0686732	0.24519	0.083267	0.236655	0.141068	0.33784	0.087086			0.333094	0.570116	0.298795	0.673371	0.229892	0.329918	0.673022	0.519283
-0.0980392	0.0372422	0.924645	0.47885	0.295666	0.0438095	0.047966	0.240626	0.0786462	0.242386	0.121896	0.334085	0.0898641			0.330935	0.584952	0.298264	0.672164	0.228342	0.310916	0.686066	0.520498
-0.0588235	0.0587194	0.948934	0.486129	0.288047	0.0354771	0.0401573	0.210601	0.0634808	0.24561	0.096616	0.329726	0.0911892			0.329257	0.605439	0.302338	0.676589	0.227215	0.297131	0.696961	0.523838
-0.0196078	0.0765229	0.991255	0.498202	0.279375	0.0276703	0.0392872	0.219832	0.050771	0.224242	0.0716967	0.329276	0.107042			0.328537	0.616743	0.298795	0.678599	0.225806	0.295082	0.725631	0.517461
0.0196078	0.0587194	0.948934	0.486129	0.288047	0.0354771	0.0401573	0.210601	0.0634808	0.24561	0.096616	0.329726	0.0911892			0.329257	0.605439	0.302338	0.676589	0.227215	0.297131	0.696961	0.523838
0.0588235	0.0372422	0.924645	0.47885	0.295666	0.0438095	0.047966	0.240626	0.0786462	0.242386	0.121896	0.334085	0.0898641			0.330935	0.584952	0.298264	0.672164	0.228342	0.310916	0.686066	0.520498
0.0980392	0.0243407	0.867765	0.462347	0.295115	0.0479519	0.0686732	0.24519	0.083267	0.236655	0.141068	0.33784	0.087086			0.333094	0.570116	0.298795	0.673371	0.229892	0.329918	0.673022	0.519283
0.137255	0.0225651	0.835304	0.458633	0.291968	0.0466215	0.0906897	0.272914	0.0737628	0.224907	0.159993	0.356287	0.0929076			0.333813	0.564111	0.306766	0.677393	0.233132	0.344448	0.668291	0.521409
0.176471	0.020366	0.818062	0.454164	0.286216	0.0458766	0.119282	0.311377	0.0649529	0.200637	0.177545	0.373319	0.0977129			0.335012	0.561639	0.311902	0.676186	0.238484	0.349851	0.670728	0.517158
0.215686	0.022502	0.81073	0.45281	0.292044	0.0487566	0.144713	0.350948	0.0575924	0.178514	0.186616	0.396797	0.101319			0.336451	0.560579	0.314559	0.674176	0.24426	0.337929	0.664564	0.514728
0.254902	0.0250078	0.809747	0.466771	0.307075	0.0515067	0.155665	0.371871	0.0557087	0.151679	0.180016	0.414501	0.103357			0.340048	0.5574	0.316684	0.674577	0.250739	0.325447	0.645786	0.517764
0.294118	0.0278434	0.801369	0.47656	0.325757	0.0550909	0.152749	0.386942	0.0566064	0.132529	0.162492	0.426604	0.109886			0.345804	0.55846	0.315267	0.677796	0.258628	0.319113	0.618836	0.520194
0.333333	0.0324062	0.778548	0.497036	0.333109	0.0595276	0.150688	0.393368	0.0564448	0.118314	0.140909	0.439659	0.114736			0.353957	0.561992	0.315267	0.686645	0.271588	0.318741	0.583142	0.524749
0.372549	0.0359786	0.768305	0.504806	0.329763	0.0638669	0.166462	0.400691	0.0560913	0.108112	0.123804	0.450312	0.125032			0.361631	0.563758	0.316684	0.697908	0.284124	0.326565	0.553326	0.532645
0.411765	0.0410339	0.748392	0.514446	0.329896	0.0691468	0.179796	0.413136	0.054671	0.100531	0.111802	0.468185	0.141063			0.373381	0.565525	0.319696	0.711182	0.298493	0.337742	0.533974	0.544488
0.45098	0.0459358	0.724732	0.531146	0.340039	0.0728325	0.196565	0.416301	0.0532418	0.0952128	0.110082	0.489648	0.166332			0.389688	0.565525	0.322352	0.725663	0.313565	0.352831	0.519639	0.563012
0.490196	0.0540042	0.70147	0.553095	0.348368	0.0759926	0.214551	0.421306	0.0556292	0.0934297	0.111241	0.521552	0.193726			0.408633	0.563405	0.323769	0.740949	0.331737	0.362891	0.524656	0.587002
0.529412	0.0630267	0.677834	0.603554	0.356337	0.0829987	0.237952	0.433956	0.0616565	0.091451	0.114154	0.560397	0.22834			0.426619	0.563758	0.324655	0.754223	0.349486	0.370715	0.548882	0.614941
0.568627	0.0762562	0.64961	0.655191	0.353143	0.0894	0.26361	0.465998	0.0703578	0.0919368	0.123555	0.603156	0.277249			0.441247	0.572943	0.324478	0.765889	0.363291	0.379844	0.588303	0.640146
0.607843	0.0897226	0.625981	0.698606	0.338123	0.0947967	0.29921	0.498641	0.0796449	0.102106	0.13504	0.645333	0.3321			0.453957	0.580007	0.326072	0.777554	0.377236	0.388413	0.631737	0.655329
0.647059	0.103457	0.608608	0.711472	0.328981	0.09832	0.345102	0.543062	0.0943078	0.122316	0.142929	0.672896	0.391119			0.465707	0.578594	0.328197	0.788013	0.390759	0.402012	0.656823	0.663528
0.686275	0.116065	0.589808	0.72982	0.332338	0.101905	0.408372	0.585461	0.106716	0.155724	0.148931	0.689551	0.434363			0.47434	0.56835	0.330676	0.797265	0.404705	0.416729	0.670442	0.672943
0.72549	0.126864	0.588638	0.753616	0.37052	0.106012	0.482285	0.628668	0.117053	0.199403	0.157282	0.693444	0.462198			0.483693	0.558813	0.334573	0.810136	0.419496	0.436103	0.680333	0.687519
0.764706	0.13467	0.602398	0.785566	0.42756	0.110309	0.566026	0.6794	0.123833	0.237883	0.17566	0.675385	0.472657			0.492086	0.554574	0.340418	0.829847	0.430483	0.456781	0.667574	0.70088
0.803922	0.141823	0.629441	0.81976	0.490532	0.115361	0.642857	0.747758	0.132569	0.268961	0.208748	0.662944	0.483325			0.497842	0.560226	0.351045	0.850362	0.437808	0.478391	0.659117	0.709079
0.843137	0.153739	0.649592	0.847946	0.544132	0.121634	0.722699	0.777575	0.140382	0.274629	0.255541	0.664437	0.500955			0.500959	0.572589	0.365037	0.866452	0.441893	0.498137	0.646359	0.713939
0.882353	0.169954	0.652666	0.870861	0.585762	0.127206	0.787313	0.797732	0.152235	0.271193	0.310173	0.690099	0.529512			0.5	0.587424	0.380801	0.876508	0.445697	0.508197	0.640482	0.720012
0.921569	0.190203	0.66766	0.890165	0.618563	0.131253	0.828907	0.812203	0.164206	0.263341	0.373406	0.72779	0.5685			0.495923	0.605086	0.395679	0.884151	0.44781	0.518443	0.649083	0.726085
0.960784	0.214847	0.700005	0.916157	0.643799	0.13407	0.844841	0.8304	0.184618	0.253143	0.438556	0.750551	0.610352			0.490887	0.619922	0.410025	0.894207	0.446401	0.526453	0.664421	0.733374
1	0.238486	0.752732	0.940645	0.675335	0.134982	0.849086	0.847931	0.209916	0.251657	0.496644	0.758704	0.649079			0.486331	0.632286	0.422954	0.905873	0.443302	0.534277	0.691084	0.74795
1.03922	0.263974	0.800562	0.959188	0.708582	0.136425	0.867523	0.8706	0.238002	0.259725	0.541792	0.768337	0.678584			0.483933	0.63829	0.436592	0.916734	0.440344	0.549926	0.734518	0.77194
1.07843	0.288715	0.838008	0.97232	0.747571	0.140678	0.90207	0.905363	0.26279	0.281929	0.582664	0.78686	0.70226			0.482734	0.633345	0.454127	0.924778	0.443161	0.565201	0.804903	0.797145
1.11765	0.309273	0.859547	0.975111	0.782832	0.145966	0.946682	0.94011	0.286461	0.306898	0.615731	0.812201	0.720776			0.485612	0.634051	0.474141	0.935237	0.448936	0.583272	0.883888	0.819617
1.15686	0.327451	0.852234	0.982473	0.824157	0.153909	0.985946	0.97502	0.316695	0.341619	0.64741	0.838246	0.740496			0.492086	0.643588	0.492916	0.95173	0.457952	0.603204	0.952839	0.841785
1.19608	0.347401	0.834986	0.987655	0.868212	0.157274	1	0.986906	0.351302	0.379816	0.679917	0.861436	0.753987			0.501919	0.657718	0.50797	0.969026	0.469644	0.614754	0.989823	0.858791
1.23529	0.37304	0.811697	0.99552	0.9164	0.164232	0.994341	0.980723	0.387906	0.427632	0.718034	0.875382	0.77012			0.513909	0.67114	0.522317	0.982702	0.482603	0.626118	1	0.867597
1.27451	0.403396	0.796077	0.990152	0.960722	0.182525	0.976507	0.964862	0.427344	0.473861	0.765889	0.884064	0.79283			0.528297	0.679972	0.538434	0.995575	0.499225	0.651453	0.986525	0.867902
1.31373	0.443284	0.813626	0.994121	0.992465	0.214047	0.961074	0.955486	0.473091	0.524091	0.819819	0.880214	0.823628			0.544124	0.683151	0.55774	1	0.513735	0.687966	0.951405	0.865775
1.35294	0.493995	0.865512	0.999999	0.98809	0.251962	0.964088	0.945541	0.526647	0.569889	0.866183	0.888431	0.858506			0.564029	0.687743	0.582359	0.999195	0.528807	0.728018	0.890338	0.87519
1.39216	0.553814	0.921746	0.998223	0.976325	0.296474	0.974174	0.942027	0.576207	0.611012	0.899398	0.903737	0.889598			0.58777	0.694808	0.607864	0.992356	0.541062	0.758756	0.824111	0.901305
1.43137	0.614397	0.960785	0.972209	0.974593	0.333798	0.989504	0.938143	0.617313	0.656797	0.927341	0.924918	0.912392			0.615347	0.703638	0.628055	0.984714	0.556135	0.784091	0.764335	0.935317
1.47059	0.688947	0.987779	0.93984	0.988148	0.368313	0.987844	0.949216	0.653661	0.695037	0.953002	0.955774	0.923195			0.645324	0.714942	0.639745	0.979082	0.575292	0.805328	0.723337	0.968418
1.5098	0.75646	1	0.907212	1	0.419043	0.972871	0.967044	0.696327	0.733602	0.971068	0.985151	0.924859			0.676499	0.726598	0.638859	0.977072	0.600366	0.823585	0.706709	0.991497
1.54902	0.812085	0.985681	0.881458	0.980912	0.486874	0.952764	0.990901	0.737951	0.763554	0.977455	1	0.920806			0.707674	0.739668	0.637796	0.979485	0.631779	0.834948	0.700688	1
1.58824	0.864108	0.947397	0.859428	0.940269	0.561631	0.944376	1	0.782661	0.799282	0.972147	0.99892	0.923688			0.739568	0.749205	0.638151	0.987529	0.665869	0.846311	0.706852	0.989674
1.62745	0.895732	0.898696	0.838125	0.906595	0.637909	0.960082	0.99506	0.826535	0.845152	0.960954	0.978717	0.938297			0.768825	0.748852	0.640808	0.989943	0.705451	0.855253	0.71832	0.962344
1.66667	0.925473	0.851978	0.802032	0.878933	0.703541	0.983907	0.986287	0.873863	0.894479	0.951511	0.960472	0.958985			0.795204	0.738961	0.655685	0.9823	0.745739	0.857862	0.717317	0.924688
1.70588	0.949421	0.808991	0.763851	0.843522	0.768186	0.991978	0.982377	0.922916	0.942767	0.952393	0.94812	0.97895			0.816547	0.731543	0.67871	0.969831	0.789125	0.849851	0.713876	0.89675
1.7451	0.960637	0.786236	0.720373	0.795889	0.824095	0.983376	0.972913	0.958889	0.977052	0.960666	0.945613	0.995054			0.83765	0.73331	0.707403	0.957763	0.829413	0.844076	0.706422	0.889766
1.78431	0.9807	0.771345	0.685047	0.742516	0.876738	0.961771	0.947319	0.980045	0.995184	0.976103	0.949346	1			0.860432	0.7432	0.743004	0.944086	0.865615	0.847057	0.706135	0.898269
1.82353	0.991509	0.748381	0.651315	0.679179	0.925349	0.942196	0.906149	0.99324	1	0.992527	0.96014	0.987914			0.883693	0.75521	0.779844	0.929605	0.893647	0.85842	0.714449	0.907379
1.86275	1	0.692232	0.623332	0.613285	0.971077	0.925901	0.870709	1	0.998301	1	0.966867	0.956726			0.908633	0.768279	0.822352	0.91432	0.914073	0.879099	0.709433	0.897358
1.90196	0.996442	0.639136	0.592101	0.541399	1	0.919853	0.839416	0.995946	0.995468	0.990792	0.972637	0.91518			0.934053	0.781349	0.859547	0.901046	0.932526	0.908718	0.696674	0.85788
1.94118	0.968004	0.592287	0.554332	0.473289	0.994627	0.925093	0.812001	0.973793	0.981423	0.955826	0.959774	0.875482			0.957554	0.791593	0.894261	0.88576	0.941682	0.949889	0.674312	0.794109
1.98039	0.927801	0.55624	0.502588	0.420387	0.960669	0.939879	0.79437	0.938356	0.956861	0.902692	0.931258	0.845996			0.978657	0.797244	0.922069	0.872887	0.952529	0.986401	0.649513	0.725174
2.01961	0.892903	0.523128	0.447575	0.377203	0.923289	0.95951	0.78634	0.890124	0.930094	0.841064	0.907153	0.827787			0.994005	0.80219	0.940843	0.861223	0.961966	1	0.626434	0.665047
2.05882	0.872633	0.489004	0.396068	0.350463	0.90204	0.970282	0.770249	0.837679	0.899313	0.782434	0.891965	0.818793			1	0.806781	0.950408	0.852776	0.973799	0.991804	0.612672	0.615548
2.09804	0.864464	0.46082	0.362042	0.334928	0.883805	0.960888	0.744212	0.784752	0.866669	0.73552	0.883942	0.805718			0.99952	0.815613	0.955898	0.846742	0.98197	0.981371	0.597477	0.574552
2.13725	0.856305	0.433778	0.341928	0.31829	0.860124	0.921526	0.71395	0.737248	0.832293	0.70186	0.88572	0.785665			0.989688	0.828682	0.958909	0.838696	0.985068	0.97895	0.582855	0.542666
2.17647	0.838447	0.4195	0.323598	0.290605	0.828708	0.86344	0.680355	0.697741	0.801743	0.673462	0.884713	0.756298			0.971703	0.84493	0.971307	0.829847	0.985209	0.984724	0.568091	0.520498
2.21569	0.807685	0.408144	0.299709	0.255244	0.797392	0.781976	0.653876	0.677601	0.77421	0.652542	0.883628	0.726041			0.950599	0.862592	0.986716	0.816573	0.983941	0.993852	0.552179	0.506832
2.2549	0.754554	0.405949	0.276818	0.22702	0.76537	0.697563	0.628678	0.675123	0.74694	0.633243	0.870853	0.69789			0.92446	0.880607	0.998583	0.801689	0.988449	0.99199	0.535264	0.498026
2.29412	0.691842	0.40298	0.259415	0.206786	0.736668	0.616355	0.612934	0.68076	0.719158	0.617669	0.848127	0.677051			0.897602	0.895796	1	0.788817	0.989858	0.972988	0.521216	0.493167
2.33333	0.631407	0.399553	0.247918	0.188714	0.714573	0.550025	0.58638	0.687156	0.68006	0.597301	0.808641	0.663548			0.869784	0.906747	0.985299	0.777152	0.997606	0.942809	0.511468	0.489219
2.37255	0.581431	0.393733	0.237692	0.169477	0.698523	0.497686	0.545836	0.683078	0.634586	0.571918	0.757865	0.652347			0.834532	0.914518	0.94899	0.766693	1	0.897541	0.505591	0.484057
2.41176	0.557935	0.391866	0.230896	0.150919	0.69597	0.463933	0.491489	0.676033	0.585696	0.534914	0.708759	0.643756			0.792326	0.920876	0.899575	0.758245	0.997746	0.847802	0.507024	0.477679
2.45098	0.553612	0.387775	0.224424	0.135399	0.695979	0.435127	0.442744	0.669458	0.537255	0.494513	0.66947	0.636083			0.73765	0.929706	0.849097	0.752615	0.992253	0.798436	0.511755	0.46948
2.4902	0.562636	0.379712	0.21764	0.122129	0.69225	0.411147	0.405872	0.657518	0.496889	0.456692	0.646417	0.626964			0.682014	0.943129	0.80836	0.743764	0.983237	0.76006	0.513762	0.461585
2.52941	0.569664	0.364771	0.210007	0.112399	0.687586	0.387058	0.377106	0.641035	0.465188	0.426056	0.64393	0.612473			0.628777	0.95196	0.776479	0.733708	0.971545	0.728204	0.513188	0.456726
2.56863	0.56465	0.352983	0.201857	0.105656	0.682041	0.363853	0.347102	0.615677	0.445517	0.406013	0.63909	0.594849			0.582014	0.955493	0.747786	0.720032	0.954219	0.703987	0.508744	0.454904
2.60784	0.551434	0.35293	0.192262	0.101418	0.67288	0.338138	0.326726	0.589602	0.437125	0.391488	0.633316	0.576087			0.542206	0.957612	0.718562	0.704746	0.937597	0.677533	0.498136	0.455208
2.64706	0.526317	0.36417	0.180802	0.0979639	0.650702	0.312335	0.317886	0.567181	0.433679	0.381247	0.62213	0.546037			0.509113	0.956552	0.687921	0.689863	0.918298	0.652198	0.485092	0.456726
2.68627	0.490856	0.38058	0.16854	0.0948327	0.618445	0.280667	0.314157	0.549044	0.427038	0.372792	0.623559	0.503082			0.482973	0.959732	0.662593	0.676186	0.891534	0.627235	0.469753	0.457334
2.72549	0.453338	0.398949	0.157379	0.091029	0.585646	0.248487	0.302353	0.53105	0.415231	0.359361	0.639598	0.447966			0.463549	0.967502	0.637443	0.665325	0.865615	0.596684	0.453842	0.457941
2.76471	0.41048	0.4209	0.148111	0.0853593	0.55007	0.216077	0.280986	0.507137	0.398758	0.336229	0.658643	0.398743			0.45084	0.977392	0.606624	0.657683	0.837583	0.565201	0.4418	0.458245
2.80392	0.367203	0.445336	0.139987	0.0781669	0.518464	0.186478	0.254284	0.474319	0.380706	0.309031	0.677531	0.360291			0.443885	0.991875	0.576514	0.65004	0.813495	0.538375	0.431479	0.457637
2.84314	0.329301	0.469471	0.133755	0.0712944	0.49326	0.158189	0.237158	0.439322	0.365885	0.280372	0.687576	0.329188			0.440768	1	0.550124	0.64119	0.796309	0.521609	0.423165	0.456119
2.88235	0.297209	0.494068	0.1276	0.0646396	0.471935	0.134142	0.23022	0.399055	0.355385	0.25172	0.690047	0.299992			0.439329	0.997174	0.529047	0.631939	0.786308	0.505216	0.419725	0.45369
2.92157	0.273195	0.511466	0.121645	0.0580756	0.447094	0.112347	0.223191	0.358988	0.347221	0.224906	0.690237	0.270139			0.43765	0.991168	0.515409	0.6251	0.791097	0.489195	0.415138	0.450349
2.96078	0.255343	0.522135	0.115324	0.0517539	0.418892	0.0949067	0.208743	0.325408	0.341947	0.197816	0.682272	0.242238			0.43693	0.983751	0.504428	0.619067	0.796309	0.471125	0.410981	0.447616
3	0.242024	0.470071	0.109389	0.0465063	0.391499	0.0827568	0.186449	0.298026	0.334089	0.172544	0.67165	0.216513			0.435491	0.972094	0.497343	0.613435	0.807297	0.455291	0.408974	0.445187
3.03922	0.233993	0.421449	0.10393	0.0422274	0.366587	0.075435	0.169726	0.27088	0.321352	0.148436	0.655818	0.194722			0.434053	0.955846	0.489019	0.609412	0.812086	0.438152	0.405246	0.442454
3.07843	0.233461	0.398969	0.09866	0.0385045	0.348258	0.0740733	0.16673	0.247697	0.304601	0.121505	0.640899	0.175834			0.430935	0.930413	0.479277	0.606999	0.806593	0.422131	0.40281	0.440328
3.11765	0.235364	0.384952	0.093041	0.0364075	0.334124	0.0756014	0.167402	0.228442	0.285499	0.0990923	0.623156	0.155309			0.42566	0.903568	0.469713	0.605792	0.785886	0.4076	0.40195	0.438505
3.15686	0.235828	0.384105	0.0884754	0.0354081	0.317678	0.0789884	0.165508	0.211509	0.268801	0.0837525	0.604948	0.136163			0.417746	0.88202	0.4582	0.606194	0.748838	0.39158	0.398653	0.437291
3.19608	0.232521	0.380562	0.0846521	0.0344107	0.298088	0.0832624	0.164595	0.199198	0.25591	0.0714656	0.588911	0.121834			0.41271	0.86012	0.446688	0.606194	0.702212	0.375373	0.395929	0.43638
3.23529	0.225309	0.379633	0.0803255	0.033031	0.285019	0.0852419	0.163614	0.19023	0.245006	0.0624782	0.579631	0.110236			0.410552	0.838926	0.438718	0.606194	0.65305	0.361587	0.390195	0.435772
3.27451	0.217625	0.371696	0.066389	0.0310812	0.278217	0.0851905	0.161127	0.184256	0.231786	0.0554702	0.571236	0.100268			0.410791	0.815613	0.431633	0.606194	0.609945	0.349292	0.381308	0.434255
3.31373	0.209938	0.355163	0.0552631	0.0289821	0.275568	0.082568	0.159	0.176377	0.217526	0.0497196	0.55477	0.0916322			0.41223	0.792652	0.423131	0.606597	0.57332	0.339046	0.364392	0.431522
3.35294	0.202894	0.34306	0.0518761	0.0267747	0.271899	0.0751126	0.15848	0.16557	0.204689	0.0449081	0.526486	0.0849441			0.411271	0.767927	0.414453	0.606597	0.546978	0.331222	0.341313	0.427877
3.39216	0.195496	0.329749	0.0499484	0.0244222	0.263676	0.0662441	0.157716	0.155064	0.195766	0.0407219	0.490807	0.0800127			0.408394	0.742494	0.403117	0.603781	0.523595	0.326937	0.323108	0.42484
3.43137	0.189352	0.316746	0.0485656	0.0217591	0.249517	0.0583439	0.153146	0.144253	0.19124	0.0368178	0.455927	0.0752638			0.404077	0.719533	0.389302	0.600965	0.500775	0.324516	0.30691	0.423322
3.47059	0.185335	0.300512	0.0472054	0.0191531	0.238291	0.0513455	0.145178	0.135724	0.188083	0.0316329	0.429065	0.0691723			0.400719	0.699752	0.374425	0.598954	0.480772	0.323211	0.290424	0.422411
3.5098	0.182642	0.287125	0.0457617	0.0166034	0.231188	0.0456472	0.13911	0.12954	0.182924	0.026798	0.410158	0.0622476			0.397122	0.684916	0.357244	0.59815	0.461192	0.321908	0.261611	0.422107
3.54902	0.182547	0.278894	0.0421722	0.0146392	0.223282	0.0419312	0.13537	0.126565	0.177989	0.0239799	0.393006	0.0558345			0.392806	0.669021	0.341126	0.596943	0.443584	0.321163	0.227637	0.422411
3.58824	0.182495	0.267126	0.0367558	0.012902	0.214841	0.0399844	0.130425	0.124949	0.172535	0.0221869	0.371059	0.0506388			0.38729	0.647474	0.326249	0.59453	0.422595	0.321349	0.204129	0.423018
3.62745	0.179545	0.252744	0.0329333	0.0115193	0.204522	0.0377629	0.125707	0.12451	0.165142	0.0209136	0.342454	0.0457541			0.380576	0.619215	0.311902	0.590909	0.400479	0.321163	0.186927	0.423929
3.66667	0.172269	0.240776	0.0301095	0.0105913	0.191772	0.0358123	0.119038	0.125217	0.156954	0.0202045	0.314725	0.041334			0.372901	0.588838	0.299504	0.586886	0.38273	0.320231	0.173452	0.424537
3.70588	0.163478	0.235452	0.0274638	0.00957759	0.1768	0.0335524	0.112714	0.127178	0.148302	0.0192359	0.289093	0.0373958			0.36307	0.559519	0.285158	0.580852	0.366108	0.318927	0.162557	0.423322
3.7451	0.15421	0.230494	0.0249242	0.00877742	0.163608	0.0315337	0.108304	0.128129	0.139397	0.0181551	0.267164	0.0338673			0.352038	0.533027	0.27152	0.575221	0.351881	0.318554	0.150516	0.419982
3.78431	0.146884	0.220685	0.0224559	0.0081479	0.152679	0.0292663	0.105235	0.123601	0.129745	0.0168153	0.247313	0.031165			0.339808	0.511833	0.257705	0.569188	0.336949	0.316692	0.140052	0.415427
3.82353	0.142489	0.209976	0.0204951	0.00728641	0.142616	0.0275448	0.100196	0.116901	0.120839	0.0161189	0.22875	0.0288233			0.327338	0.489932	0.243889	0.563556	0.326525	0.314642	0.130304	0.410264
3.86275	0.13986	0.198884	0.0188524	0.00642798	0.127831	0.0256961	0.0944848	0.111736	0.112644	0.0158826	0.21253	0.0262142			0.313669	0.470152	0.231668	0.557924	0.321595	0.312407	0.121273	0.40328
3.90196	0.139277	0.187454	0.0173158	0.0059119	0.110597	0.0242774	0.0878832	0.106962	0.104246	0.0158571	0.196561	0.023514			0.29976	0.45143	0.220687	0.5535	0.319341	0.309985	0.112815	0.395384
3.94118	0.139527	0.174706	0.0160981	0.00545612	0.0943207	0.0223727	0.0809788	0.100951	0.0971073	0.015844	0.183272	0.0211968			0.284653	0.433768	0.210414	0.551086	0.313565	0.30775	0.104644	0.386881
3.98039	0.14068	0.160977	0.0154254	0.00514341	0.0807621	0.0207988	0.0746722	0.0962129	0.0903551	0.0156597	0.170137	0.0194308			0.269065	0.417873	0.20085	0.54827	0.301451	0.304769	0.0974772	0.378378
4.01961	0.140587	0.144326	0.0147388	0.0046631	0.0706629	0.0188922	0.0699805	0.0921072	0.0844289	0.0151062	0.157704	0.0179644			0.253477	0.401625	0.191994	0.544649	0.282434	0.30123	0.0908829	0.368964
4.05882	0.136863	0.132634	0.0139679	0.00415417	0.0628957	0.0176903	0.0660082	0.0896175	0.0795048	0.0141328	0.146558	0.0166066			0.240048	0.386082	0.18367	0.542236	0.258065	0.297317	0.0847191	0.358032
4.09804	0.129662	0.121821	0.0128789	0.00363605	0.0568993	0.0167856	0.0619064	0.0877288	0.0753377	0.0132175	0.136581	0.0153743			0.228777	0.370541	0.176231	0.541029	0.233836	0.291915	0.0788416	0.346189
4.13725	0.119305	0.110234	0.0116455	0.00343677	0.0525377	0.015879	0.0590624	0.0854992	0.0710903	0.0123921	0.12664	0.014225			0.218945	0.355705	0.168969	0.539822	0.213551	0.286699	0.0729646	0.333434
4.17647	0.107381	0.0981024	0.0104557	0.00326918	0.0497592	0.0150079	0.0559544	0.082733	0.0667588	0.0118052	0.118691	0.0128359			0.210791	0.341929	0.162416	0.537812	0.197352	0.281855	0.066944	0.320072
4.21569	0.095824	0.086349	0.00906074	0.00287573	0.0480331	0.0143051	0.0520778	0.0790452	0.0615267	0.0111745	0.110521	0.0114935			0.203117	0.328153	0.156217	0.537409	0.184956	0.277198	0.0607797	0.306711
4.2549	0.0851654	0.0752743	0.00803603	0.0024782	0.0474141	0.0129415	0.048328	0.074971	0.0563703	0.0105985	0.100997	0.0100301			0.195683	0.315436	0.149132	0.539019	0.173405	0.272541	0.0551891	0.292135
4.29412	0.0767272	0.0657002	0.00719558	0.00197132	0.0478981	0.0114144	0.0443194	0.0638495	0.0504619	0.0099137	0.0911021	0.00890641			0.18825	0.303426	0.141693	0.540627	0.162136	0.267139	0.0497421	0.276648
4.33333	0.070244	0.0594882	0.00628907	0.00145524	0.0477378	0.00990311	0.0407611	0.0527153	0.0443175	0.00940311	0.0806635	0.00802955			0.180576	0.292123	0.1339	0.541432	0.151712	0.261736	0.0447248	0.260856
4.37255	0.0662823	0.0544886	0.00557203	0.00115274	0.0463648	0.00870214	0.0368923	0.0465012	0.0385283	0.00896977	0.0683884	0.0071952			0.172901	0.281172	0.126461	0.541432	0.142274	0.251118	0.0398511	0.245369
4.41176	0.062866	0.0509187	0.0047507	0.00093201	0.0419525	0.00749182	0.0332202	0.0424876	0.0337459	0.00853369	0.0589385	0.00628965			0.165468	0.270929	0.119199	0.539421	0.134103	0.236587	0.0351206	0.230792
4.45098	0.0583682	0.0469423	0.00389634	0.00070105	0.0381937	0.00639739	0.0302415	0.0400636	0.03026	0.00806507	0.0514724	0.00542098			0.158753	0.260332	0.111583	0.531375	0.126638	0.227645	0.0303901	0.216824
4.4902	0.0531726	0.0387496	0.00309499	0.00055798	0.0353817	0.0051039	0.0281609	0.0377431	0.0278373	0.00738114	0.0459197	0.00442478			0.152038	0.249735	0.104145	0.518906	0.119876	0.217958	0.0260896	0.202855
4.52941	0.0472923	0.0314245	0.00235797	0.00056104	0.0326387	0.0041263	0.0261269	0.0344706	0.0263859	0.0065324	0.0418448	0.00352128			0.145563	0.239138	0.0968826	0.504023	0.114523	0.209948	0.0219323	0.187671
4.56863	0.0415124	0.0235804	0.00171481	0.00059477	0.030328	0.00318141	0.0226721	0.0309116	0.0253438	0.00574629	0.0388107	0.00280525			0.139568	0.229954	0.0903294	0.488335	0.110579	0.203242	0.0180619	0.17188
4.60784	0.0356832	0.0182362	0.00142451	0.00055798	0.0282579	0.00237764	0.0189689	0.0276593	0.0245443	0.00494377	0.0368405	0.00228179			0.133813	0.221124	0.0841302	0.468222	0.107762	0.195604	0.0144784	0.156696
4.64706	0.031059	0.0137891	0.00099516	0.00045681	0.0253038	0.00145051	0.0152217	0.0245927	0.0239408	0.00427445	0.0356556	0.0019166			0.128537	0.212292	0.0784628	0.411102	0.105367	0.187034	0.0111812	0.141512
4.68627	0.0267182	0.010022	0.00078396	0.00040469	0.0222117	0.00089816	0.0119998	0.0222683	0.0231992	0.00371703	0.0343387	0.00161953			0.123501	0.202755	0.072618	0.372083	0.103254	0.171758	0.00860092	0.126936
4.72549	0.0228141	0.0074605	0.0005858	0.00030249	0.0200178	0.00041684	0.00936023	0.0202635	0.0229231	0.00312433	0.0328417	0.00132964			0.119424	0.193218	0.067127	0.342719	0.101845	0.15965	0.00587744	0.112663
4.76471	0.0200398	0.00522088	0.00040328	0.00021154	0.0178634	0.00018505	0.00717092	0.018607	0.0224324	0.00260493	0.0308827	0.00105254			0.115827	0.183327	0.0616366	0.317779	0.100296	0.149963	0.00401362	0.0996049
4.80392	0.0171494	0.00374567	0.00029029	0.00015329	0.016261	4.5796e-05	0.00569067	0.0171577	0.0221861	0.00212111	0.0290982	0.0007985			0.11223	0.173437	0.0565	0.294047	0.0988872	0.140835	0.00272348	0.0874582
4.84314	0.0145665	0.00240056	0.00016687	0.00011241	0.0152482	0	0.00454684	0.015928	0.0223422	0.00173611	0.0271224	0.00056597			0.108873	0.163546	0.0515409	0.275946	0.0974787	0.132638	0.00143334	0.0759183
4.88235	0.0125494	0.00150739	8.7783e-05	0.00010219	0.013994	0	0.00335385	0.0148611	0.0227959	0.00144935	0.02537	0.00036109			0.105755	0.154009	0.0469357	0.255028	0.0949431	0.125745	0.0010033	0.064986
4.92157	0.0106234	0.00100046	3.3027e-05	7.2558e-05	0.0125438	0	0.00228765	0.0138764	0.0231087	0.00119603	0.0240074	0.00022024			0.102878	0.144472	0.042508	0.238938	0.0832512	0.119412	0.00043005	0.0549648
