# Supplementary material for: Microtubules restrict F-actin polymerization to the immune synapse via GEF-H1 to maintain polarity in lymphocytes
Source: eLife journal article supplement (doi:10.7554/elife.78330), 2022-09-16
Supplement: supp [file Figure6- figure supplement1A_B.xlsx]

## Sheet: Fig6-figsupp1A
2D Aspect ratio of cell mask
siCtrl pRK5 DMSO	siCtrl pRK5 Noco	siGEFH1 pRK5 Noco	siGEFH1 GEFH1 Noco
1.123	1.434	1.479	1.263
1.068	1.423	2.222	1.368
1.369	1.523	1.325	1.156
1.066	1.115	1.225	1.313
1.179	1.389	1.247	1.544
1.069	1.423	1.016	2.057
1.268	1.062	1.126	1.767
1.053	1.899	1.169	1.527
1.337	1.716	1.038	1.092
1.189	1.035	1.776	1.13
1.053	1.679	1.772	1.273
1.087	2.03	1.06	1.478
1.158	1.62	1.297	1.021
1.094	1.16	1.288	1.494
1.141	1.277	1.034	1.553
1.11	1.047	1.3	1.121
1.101	1.422	1.063	1.392
1.043	1.88	1.04	1.329
1.072	1.319	1.431	1.077
1.115	1.036		2.143
1.029	1.464		1.125
1.179	1.584		1.41
1.151	1.403		1.485
1.138	1.23
1.063	1.799
1.015	1.385
1.115	1.217
1.17	2.034
1.116	1.676
1.143	1.62
1.112	1.89
1.42
1.17
1.121
1.052
1.033
1.187
1.093
1.116
1.321
1.243
1.095
1.099
1.542
1.063
1.144
1.117
1.104
1.162
1.15
1.031
1.054
1.026
1.028	1.685	1.121	1.707
1.07	2.114	1.784	1.179
1.085	1.334	1.206	1.393
1.011	1.787	1.045	1.368
1.059	1.859	1.05	1.127
1.112	1.995	1.14	1.176
1.06	1.773	1.061	2.123
1.048	1.511	1.521	1.339
1.095	1.061	1.455	1.271
1.012	1.06	1.121	1.108
1.064	1.309	1.211	1.28
1.181	1.408	1.301	1.046
1.033	1.374	1.578	1.16
1.015	1.439	1.067	1.601
1.099	1.217	1.013	2.626
1.033	1.423	1.081	1.139
1.245	2.52	1.492	1.652
1.269	1.445	1.031	1.128
1.235	1.671	1.73	1.218
1.087	1.493	1.107	1.574
1.06	1.173	1.182	1.328
1.169	1.523	1.03
1.031	1.737	1.013	1.045
1.086	1.434	1.741	1.049
1.059	2.057	1.388	1.187
1.084	1.09	1.197	1.464
1.153	1.766	1.164	2.122
1.061	1.599	1.063	2.002
1.079	1.397	1.04	1.593
1.223	1.689	1.615	1.104
1.191	1.598	1.578	1.95
1.106	1.097	1.016	1.569
1.106	1.963	1.107	1.062
1.047	1.471	1.193	1.028
	1.897	1.351	2.247
		1.068	1.602
			1.389
			1.368
			1.798
			1.479
			1.302
			1.221
			1.232
			1.127
			1.17
			1.106
			1.359
			2.02
			1.431
			1.864
			2.368
			1.102
			1.346
			2.268
			1.439
			1.637
			2.063
			1.174
			2.263
			1.303
			2.112
			2.065

## Sheet: Fig6-figsupp1B
siCtrl pRK5 DMSO	siCtrl pRK5 Noco	siGEFH1 pRK5 Noco	siGEFH1 GEFH1 Noco
0.9	0.929	0.875	0.764
0.935	0.743	0.915	0.84
0.835	0.856	0.943	0.918
0.954	0.935	0.929	0.92
0.845	0.904	0.906	0.857
0.848	0.865	0.919	0.91
0.927	0.938	0.932	0.838
0.957	0.839	0.813	0.853
0.938	0.799	0.85	0.948
0.944	0.946	0.888	0.947
0.956	0.863	0.817	0.541
0.955	0.807	0.885	0.901
0.907	0.838	0.932	0.939
0.938	0.814	0.922	0.862
0.936	0.873	0.875	0.744
0.906	0.893	0.833	0.963
0.946	0.837	0.895	0.78
0.957	0.777	0.943	0.865
0.958	0.891	0.927	0.861
0.929	0.936		0.765
0.918	0.844		0.94
0.934	0.727		0.647
0.674	0.802		0.901
0.678	0.837
0.936	0.753
0.952	0.915
0.603	0.685
0.874	0.842
0.808	0.905
0.788	0.899
0.903	0.812
0.93
0.828
0.877
0.906
0.938
0.933
0.653
0.886
0.872
0.607
0.913
0.931
0.9
0.939
0.895
0.886
0.927
0.954
0.938
0.911
0.742
0.942
0.807	0.749	0.909	0.818
0.867	0.797	0.915	0.823
0.867	0.834	0.944	0.816
0.892	0.874	0.638	0.803
0.694	0.732	0.959	0.944
0.888	0.928	0.9	0.851
0.89	0.891	0.78	0.876
0.931	0.915	0.838	0.913
0.879	0.934	0.878	0.878
0.945	0.908	0.894	0.898
0.9	0.807	0.89	0.949
0.86	0.692	0.822	0.951
0.879	0.754	0.894	0.956
0.925	0.876	0.918	0.853
0.857	0.844	0.953	0.826
0.897	0.81	0.91	0.942
0.921	0.839	0.909	0.869
0.796	0.886	0.815	0.795
0.885	0.662	0.78	0.891
0.791	0.805	0.841	0.885
0.855	0.847	0.55	0.94
0.873	0.862	0.905
0.928	0.816	0.918	0.892
0.858	0.921	0.925	0.804
0.865	0.816	0.544	0.835
0.926	0.827	0.701	0.617
0.81	0.803	0.812	0.81
0.88	0.842	0.751	0.87
0.871	0.867	0.887	0.402
0.729	0.85	0.931	0.864
0.831	0.837	0.86	0.787
0.915	0.717	0.885	0.788
0.844	0.813	0.867	0.923
0.897	0.792	0.873	0.933
	0.836	0.84	0.648
		0.914	0.816
			0.607
			0.854
			0.703
			0.794
			0.902
			0.912
			0.825
			0.868
			0.736
			0.769
			0.858
			0.608
			0.821
			0.843
			0.64
			0.821
			0.842
			0.814
			0.837
			0.839
			0.738
			0.831
			0.753
			0.744
			0.915
			0.687
