# Supplementary material for: Microtubules restrict F-actin polymerization to the immune synapse via GEF-H1 to maintain polarity in lymphocytes
Source: eLife journal article supplement (doi:10.7554/elife.78330), 2022-09-16
Supplement: supp [file Figure6- figure supplement1C.xlsx]

## Sheet: Sheet 1
Antigen recruitment (only final image, no movie)
siCtrlDMSO	siCtrlNOCO	siGEFDMSO	siGEFNOCO
1.683	1.375	1.104	1.376
1.536	1.267	1.351	1.602
1.635	1.992	1.299	1.669
1.313	1.554	1.947	1.826
2.362	1.397	2.181	1.762
1.832	1.78	1.281	1.924
2.239	1.331	1.695	1.184
1.416	1.459	1.335
1.4	2.092	1.692
1.244	1.558	2.311
1.836	1.568	1.848
1.131	1.048	1.867
2.309	1.17	1.384
1.934	1.25	1.587
1.69	1.598	1.35
1.29	1.359	1.869
1.901	2.47	1.336
1.462	1.073	2.101
1.017	1.445	1.726
1.224		1.231
1.209
1.1
1.412
1.61
1.575
1.095
1.814
1.082
1.282
2.338
1.051
3.53	1.78	2.927	3.118
2.209	1.938	3.479	1.013
2.387	0.897	2.452	4.646
3.504	1.37	1.853	2.471
4.654		2.276	1.528
1.588		2.165	1.827
2.49		2.304	1.51
1.078		2.589	1.924
		2.786	1.069
		1.809	1.227
		2.057	1.629
		2.068	4.088
		3.29	3.598
		2.495	0.904
		3.102	2.207
		1.008	1.607
		2.872	1.248
		2.351	1.081
		2.497	1.135
		3.457	1.113
		3.137	5.224
		1.079	2.306
		2.462
		3.069
		2.297
		1.759
		1.716
		1.668
		1.484
		1.538
		2.102
		2.286
		2.486
		1.412
		2.059
		3.324
		3.588
		1.845
		2.193
		2.212
		1.613
		2.191
		4.824
