# Supplementary material for: Microtubules restrict F-actin polymerization to the immune synapse via GEF-H1 to maintain polarity in lymphocytes
Source: eLife journal article supplement (doi:10.7554/elife.78330), 2022-09-16
Supplement: supp [file Figure6- figure supplement1E.xlsx]

## Sheet: Sheet 1
Actin profile (linescan along cell)
Normalised distance from synapse	siCtrl DMSO																																siCtrl Noco
0	0.0516431	0.347755	0.379808	0.0332608	0.0467224	0.448225	0.156423	0.268632	0.263587	0.530712	0.341055	0.283774	0.33462	0.287876	0.215871	0.187701	0.324533	0.212795	0.355246	0.211501	0.369173	0.556043	0.356176	0.361481	0.372109	0.015675	0.076971	0.249054	0.121295	0.374181			0.0562562	0.0655488	0.182726	0.304554	0.138845	0.81208	0.138022	0.0225297	0.00214723	0.0978632	0.186577	0.270499	0.172397	0.776319	0.130725	0.371079	0.332562
0.01	0.0815235	0.399982	0.490915	0.0721561	0.0856854	0.624645	0.258819	0.3676	0.369515	0.661309	0.428493	0.39751	0.486404	0.422195	0.288394	0.304197	0.463362	0.271259	0.529757	0.316202	0.516772	0.773058	0.519784	0.410455	0.482045	0.0345921	0.102645	0.30799	0.188877	0.423677			0.114596	0.0837614	0.288975	0.439072	0.166942	0.840316	0.274427	0.0691279	0.0208931	0.162783	0.234103	0.318416	0.243099	0.892054	0.241305	0.633972	0.399376
0.02	0.133692	0.454334	0.600778	0.150235	0.152174	0.793468	0.41521	0.49366	0.506544	0.775181	0.53851	0.538772	0.642297	0.597303	0.379846	0.440003	0.655493	0.333918	0.689739	0.543785	0.703059	0.957663	0.639532	0.464516	0.656698	0.06386	0.133284	0.358754	0.274139	0.499154			0.180779	0.111864	0.363474	0.63665	0.203164	0.935065	0.398909	0.157754	0.0927246	0.230644	0.284678	0.399989	0.358728	0.954243	0.473658	0.713089	0.505384
0.03	0.217151	0.515626	0.703796	0.278162	0.280518	0.934043	0.565646	0.643676	0.649632	0.866385	0.653796	0.69404	0.788156	0.760964	0.474669	0.559051	0.851036	0.429067	0.83206	0.809675	0.888206	0.985449	0.708804	0.533607	0.842142	0.0978189	0.170325	0.402032	0.371102	0.601496			0.226437	0.164123	0.395503	0.865051	0.260432	0.995084	0.472287	0.271596	0.239428	0.256405	0.320628	0.533292	0.508277	0.972236	0.799834	0.72388	0.642817
0.04	0.327763	0.580897	0.807094	0.448407	0.501199	0.994334	0.682729	0.782997	0.791118	0.937012	0.761293	0.841649	0.891335	0.847261	0.556824	0.644859	0.973616	0.590492	0.944047	0.968244	0.986489	0.84837	0.730042	0.631989	0.969418	0.118119	0.215464	0.446825	0.480497	0.712914			0.243603	0.245146	0.425217	0.995957	0.351563	0.831833	0.525161	0.37818	0.387561	0.247428	0.346595	0.719592	0.653771	0.938606	0.999456	0.738539	0.766461
0.05	0.480208	0.645745	0.90216	0.629588	0.761942	0.968455	0.826191	0.89791	0.897928	0.978589	0.861569	0.943349	0.952119	0.890739	0.639403	0.687932	0.992493	0.805424	0.992161	0.994795	0.998809	0.657582	0.746241	0.774897	0.986939	0.12624	0.262918	0.495336	0.596094	0.805373			0.239828	0.349823	0.480054	0.969855	0.495458	0.550672	0.57404	0.441593	0.431178	0.240406	0.383787	0.903665	0.773538	0.911014	0.935244	0.798959	0.862429
0.06	0.671154	0.701169	0.965993	0.775765	0.942831	0.865472	0.968711	0.978694	0.969589	0.994323	0.946528	0.986161	0.987519	0.941829	0.741242	0.702501	0.947514	0.970929	0.998383	0.928691	0.969996	0.48547	0.787361	0.926985	0.922763	0.129309	0.305813	0.541546	0.715739	0.881605			0.218517	0.453997	0.518399	0.850418	0.697957	0.40793	0.59492	0.478448	0.39414	0.25187	0.443689	0.992699	0.842479	0.862143	0.843173	0.80214	0.941874
0.07	0.847078	0.747291	0.989372	0.872822	0.994634	0.739838	0.989909	0.994209	0.997796	0.995753	0.991813	0.999399	0.999838	0.991427	0.857435	0.733972	0.876521	0.976398	0.971261	0.837293	0.950148	0.348969	0.850419	0.992375	0.82314	0.137862	0.363112	0.582144	0.845939	0.940364			0.178609	0.52921	0.53304	0.71701	0.890713	0.320699	0.543575	0.493776	0.341891	0.246799	0.515315	0.987961	0.874119	0.771158	0.569724	0.741595	0.992786
0.08	0.966237	0.783706	0.999221	0.941462	0.921443	0.621157	0.894117	0.885593	0.963343	0.976287	0.998594	0.986251	0.976369	0.993736	0.954129	0.795018	0.801597	0.847453	0.896596	0.741257	0.921681	0.243135	0.920154	0.962313	0.695695	0.153228	0.441822	0.621131	0.957375	0.982943			0.164553	0.553889	0.513002	0.604966	0.997192	0.268361	0.478398	0.479264	0.300464	0.256599	0.599346	0.956273	0.913473	0.726641	0.334771	0.729261	0.974118
0.09	0.998487	0.807972	0.9833	0.987059	0.744396	0.520933	0.740736	0.721315	0.841957	0.957831	0.975266	0.947672	0.914953	0.943456	0.996458	0.875847	0.726299	0.689394	0.782273	0.643036	0.872705	0.168294	0.975	0.887289	0.568421	0.17122	0.523313	0.66179	0.997146	0.997574			0.158345	0.545012	0.4839	0.517207	0.974552	0.235403	0.456087	0.441755	0.266986	0.280163	0.676501	0.937024	0.961155	0.710783	0.240949	0.754276	0.894703
0.1	0.957133	0.83294	0.928648	0.997679	0.543504	0.451881	0.576948	0.565568	0.676834	0.940272	0.921406	0.881579	0.835499	0.85311	0.962751	0.953708	0.660065	0.558351	0.64828	0.568796	0.810561	0.124602	0.997331	0.822117	0.46581	0.190941	0.581111	0.709386	0.931262	0.966845			0.153941	0.511807	0.446514	0.449795	0.875206	0.242383	0.439083	0.394277	0.242937	0.274237	0.701173	0.908178	0.993164	0.698733	0.193391	0.733309	0.798211
0.11	0.894039	0.861639	0.827197	0.957563	0.384502	0.410552	0.469345	0.45721	0.515189	0.90658	0.855627	0.789936	0.748661	0.723941	0.853158	0.994605	0.613754	0.468522	0.524408	0.525742	0.721766	0.10505	0.997824	0.791549	0.402634	0.217691	0.613493	0.761033	0.762886	0.892156			0.15685	0.474399	0.38541	0.408224	0.74937	0.291	0.417309	0.35646	0.219517	0.250268	0.684713	0.849233	0.999455	0.69964	0.179399	0.656794	0.695548
0.12	0.80815	0.88132	0.72421	0.884578	0.291002	0.378763	0.409922	0.390801	0.39451	0.844159	0.794289	0.689095	0.667919	0.592844	0.683653	0.995492	0.582828	0.396291	0.44567	0.500477	0.607784	0.093967	0.985572	0.791747	0.370081	0.244003	0.641461	0.831632	0.576248	0.796788			0.177847	0.4395	0.325059	0.391293	0.617288	0.338781	0.403669	0.354842	0.203639	0.22916	0.636311	0.776807	0.994074	0.727731	0.184371	0.559807	0.597462
0.13	0.671654	0.881768	0.639038	0.846231	0.233847	0.349503	0.370398	0.335687	0.325909	0.785963	0.764935	0.596144	0.588609	0.479881	0.499363	0.947471	0.564581	0.331439	0.400938	0.468479	0.499371	0.0869221	0.953503	0.814399	0.336147	0.268587	0.689028	0.909735	0.442008	0.696963			0.21423	0.408631	0.277746	0.375473	0.494303	0.375518	0.409167	0.366463	0.197156	0.214459	0.56409	0.68039	0.97924	0.715371	0.164247	0.46049	0.501667
0.14	0.523013	0.872923	0.559528	0.81505	0.208977	0.322543	0.348474	0.281371	0.29823	0.743318	0.766447	0.519015	0.515566	0.374799	0.372654	0.854304	0.559139	0.281103	0.371714	0.423673	0.416235	0.0829924	0.892682	0.841391	0.293565	0.283593	0.758467	0.976723	0.359678	0.60504			0.239477	0.380084	0.244181	0.348497	0.39684	0.377269	0.396826	0.366955	0.202558	0.220613	0.523717	0.574461	0.925873	0.605643	0.122937	0.395003	0.422319
0.15	0.4136	0.871569	0.496669	0.768827	0.201044	0.297116	0.324831	0.241093	0.299061	0.695389	0.77038	0.455059	0.443803	0.288305	0.295127	0.762318	0.565896	0.251793	0.349947	0.388902	0.372136	0.0835877	0.809978	0.862949	0.256605	0.29537	0.836315	0.995132	0.331901	0.519787			0.252686	0.358465	0.218737	0.313627	0.331212	0.349076	0.364649	0.375415	0.209397	0.236784	0.52489	0.492466	0.835322	0.521101	0.107518	0.332375	0.365924
0.16	0.349639	0.878179	0.457823	0.70849	0.194676	0.274753	0.292982	0.219974	0.310498	0.632336	0.763792	0.402071	0.377428	0.235588	0.238254	0.691672	0.577899	0.237932	0.333039	0.367287	0.355557	0.0901287	0.72562	0.887955	0.231933	0.303886	0.911233	0.940068	0.342137	0.455723			0.276724	0.350512	0.21554	0.276153	0.286605	0.320572	0.349163	0.405352	0.212655	0.255967	0.572682	0.438633	0.742323	0.506725	0.112184	0.263392	0.329388
0.17	0.304448	0.892458	0.439656	0.652713	0.184764	0.255276	0.272494	0.209768	0.32444	0.563437	0.76543	0.358231	0.320481	0.20104	0.198156	0.640868	0.588381	0.232579	0.320716	0.342178	0.363773	0.0931077	0.654702	0.922964	0.223075	0.295515	0.97213	0.836626	0.358706	0.414698			0.304115	0.356829	0.217026	0.246691	0.253109	0.315639	0.344123	0.438035	0.21504	0.273553	0.660231	0.394853	0.674965	0.523944	0.131559	0.209219	0.306736
0.18	0.26467	0.917423	0.429757	0.588154	0.16985	0.234975	0.261749	0.201856	0.330127	0.504625	0.781764	0.315003	0.275501	0.186209	0.176556	0.604643	0.58334	0.232037	0.324243	0.312372	0.387748	0.0903349	0.602292	0.952248	0.23428	0.267111	0.999973	0.73302	0.354918	0.396375			0.322739	0.371614	0.215786	0.229321	0.227561	0.342671	0.363874	0.467564	0.218401	0.288053	0.77395	0.355373	0.625398	0.54626	0.150357	0.178002	0.297635
0.19	0.228443	0.936082	0.418957	0.514464	0.156354	0.215301	0.244234	0.190974	0.327743	0.459638	0.816267	0.271492	0.239102	0.199967	0.172761	0.579019	0.567919	0.235538	0.327173	0.291657	0.434368	0.0882196	0.567875	0.962358	0.259511	0.230107	0.987589	0.639224	0.341561	0.391187			0.316425	0.392091	0.21449	0.224319	0.20921	0.380206	0.38853	0.486894	0.225813	0.3242	0.912228	0.33254	0.573302	0.559713	0.15911	0.163237	0.288096
0.2	0.19322	0.943635	0.403552	0.454158	0.142193	0.199014	0.227667	0.175408	0.315469	0.422357	0.852144	0.237306	0.207766	0.233674	0.174071	0.545672	0.549574	0.249247	0.32282	0.28663	0.48975	0.0889404	0.523785	0.963512	0.289435	0.200199	0.944921	0.558543	0.331931	0.401871			0.310771	0.394849	0.212524	0.23236	0.195273	0.414093	0.382859	0.487933	0.229446	0.285375	0.999392	0.326575	0.516047	0.570415	0.162781	0.166919	0.271806
0.21	0.173381	0.955093	0.371266	0.41015	0.132599	0.187193	0.220676	0.163233	0.302422	0.391801	0.860099	0.212631	0.185281	0.268419	0.171548	0.516991	0.526972	0.27401	0.308306	0.281473	0.522332	0.0904048	0.474797	0.975345	0.302039	0.177216	0.883671	0.501892	0.329363	0.417512			0.314136	0.370508	0.200528	0.246225	0.183886	0.441789	0.364783	0.48064	0.220756	0.245513	0.97296	0.315918	0.473337	0.591627	0.157947	0.181216	0.261354
0.22	0.165947	0.971593	0.330955	0.372954	0.127457	0.180791	0.217283	0.156216	0.296699	0.376555	0.833591	0.190845	0.170925	0.291989	0.16709	0.507774	0.496372	0.312523	0.292023	0.260695	0.529643	0.0931853	0.439542	0.992652	0.295485	0.165525	0.797696	0.468484	0.312377	0.416265			0.32081	0.340699	0.184031	0.264827	0.173907	0.456303	0.358724	0.487542	0.210815	0.257808	0.871403	0.298436	0.441868	0.636753	0.147731	0.197764	0.258045
0.23	0.162645	0.990234	0.303613	0.340741	0.121314	0.179138	0.212634	0.15237	0.294951	0.369474	0.793726	0.169106	0.165299	0.305512	0.164814	0.522281	0.460915	0.358278	0.286705	0.234375	0.526955	0.0973815	0.417863	0.996041	0.27443	0.157373	0.693408	0.454086	0.284879	0.39319			0.324057	0.324745	0.170226	0.281445	0.166075	0.491513	0.395808	0.514212	0.224586	0.288851	0.765981	0.290174	0.417596	0.709173	0.1335	0.218975	0.258029
0.24	0.165595	1	0.295893	0.309756	0.115161	0.175286	0.207087	0.146429	0.298167	0.360092	0.762809	0.152932	0.161663	0.32192	0.165909	0.545879	0.42946	0.394076	0.290656	0.216501	0.526124	0.102382	0.397911	0.972897	0.253988	0.152248	0.570309	0.452647	0.266064	0.360962			0.342611	0.317998	0.151323	0.289865	0.16217	0.562689	0.44601	0.545446	0.245459	0.313408	0.681081	0.301473	0.38922	0.782804	0.115235	0.251206	0.25595
0.25	0.172085	0.998058	0.305005	0.285253	0.110169	0.168133	0.201054	0.138433	0.306103	0.353554	0.723972	0.142987	0.160191	0.311619	0.168426	0.551335	0.409981	0.408609	0.295337	0.211918	0.516929	0.105741	0.380004	0.942681	0.240548	0.151193	0.461378	0.46202	0.261871	0.337914			0.389137	0.313784	0.142589	0.282679	0.158993	0.628091	0.466961	0.606963	0.251284	0.34769	0.59565	0.314066	0.366945	0.822912	0.111562	0.266827	0.247803
0.26	0.182832	0.998363	0.321514	0.273784	0.106629	0.163372	0.197166	0.132388	0.316566	0.353089	0.658652	0.134364	0.167035	0.281037	0.164635	0.545556	0.392714	0.410761	0.292954	0.214044	0.494641	0.107475	0.365045	0.923507	0.23008	0.150829	0.384492	0.475926	0.270735	0.32401			0.416132	0.309483	0.135248	0.270018	0.161317	0.641896	0.473961	0.695631	0.248422	0.35617	0.511501	0.311101	0.350898	0.852557	0.126713	0.285913	0.239296
0.27	0.199217	0.995773	0.339917	0.277803	0.105058	0.161074	0.20127	0.130784	0.322566	0.360874	0.587988	0.123925	0.175911	0.257276	0.158192	0.551692	0.372897	0.392927	0.290367	0.210485	0.480309	0.110246	0.351609	0.922029	0.224264	0.154303	0.338985	0.504884	0.280366	0.310884			0.445716	0.306276	0.130969	0.261896	0.171458	0.585908	0.451161	0.739112	0.237457	0.376708	0.454541	0.296512	0.342735	0.891164	0.137018	0.324869	0.232543
0.28	0.216841	0.968745	0.346871	0.297849	0.109119	0.160478	0.208603	0.133529	0.317605	0.377546	0.5399	0.113934	0.175661	0.254276	0.153962	0.559644	0.35348	0.366957	0.293859	0.204714	0.47209	0.113698	0.346088	0.938257	0.226224	0.157858	0.313183	0.544412	0.274963	0.286112			0.491587	0.300247	0.129677	0.24768	0.185274	0.525669	0.402084	0.675533	0.227655	0.36746	0.421187	0.278179	0.336244	0.932409	0.14666	0.378661	0.229472
0.29	0.232803	0.930756	0.352784	0.317866	0.11632	0.158011	0.219203	0.138482	0.301629	0.404906	0.509257	0.103077	0.16836	0.25496	0.153788	0.557415	0.341386	0.350402	0.28961	0.20584	0.459881	0.115013	0.345709	0.950784	0.234452	0.159585	0.308971	0.56336	0.255009	0.262386			0.536	0.296207	0.141696	0.23617	0.195077	0.463561	0.359905	0.595863	0.227558	0.352295	0.408498	0.260352	0.326022	0.971296	0.157726	0.413746	0.227632
0.3	0.243306	0.897322	0.364773	0.312546	0.121787	0.152524	0.233207	0.144601	0.284127	0.427773	0.486315	0.0952758	0.159614	0.246205	0.156438	0.541795	0.329857	0.341559	0.271945	0.212565	0.438108	0.111719	0.350547	0.957142	0.249827	0.163695	0.324711	0.562828	0.234173	0.252468			0.574411	0.29591	0.156722	0.242491	0.195472	0.414077	0.338463	0.578745	0.233571	0.374256	0.411905	0.244103	0.320918	0.983126	0.156254	0.396178	0.223547
0.31	0.242777	0.863645	0.377532	0.284262	0.128733	0.14649	0.248543	0.151986	0.270314	0.436339	0.469145	0.0948489	0.151409	0.237406	0.163601	0.519194	0.320303	0.329344	0.252075	0.216811	0.413298	0.109545	0.361846	0.953832	0.27047	0.171962	0.352613	0.544353	0.223393	0.257942			0.59184	0.295342	0.160668	0.261191	0.188905	0.403082	0.337134	0.664672	0.234302	0.387759	0.417058	0.221155	0.319787	0.965347	0.157933	0.399389	0.217802
0.32	0.245176	0.838409	0.392256	0.26463	0.141283	0.141413	0.255411	0.154905	0.264761	0.433569	0.469188	0.100057	0.144504	0.230502	0.174727	0.478944	0.311951	0.309299	0.239866	0.210114	0.394036	0.109329	0.382846	0.934688	0.297403	0.178117	0.374323	0.506885	0.225807	0.26562			0.573231	0.283112	0.16295	0.282216	0.179211	0.411713	0.316296	0.834874	0.233197	0.386686	0.403051	0.193336	0.322615	0.954068	0.170974	0.413033	0.207654
0.33	0.254672	0.822958	0.416327	0.269569	0.155501	0.135967	0.253708	0.152226	0.269286	0.422663	0.481166	0.108678	0.143277	0.230524	0.185211	0.431661	0.307424	0.289753	0.236743	0.202568	0.36837	0.110031	0.398166	0.904619	0.327111	0.187513	0.388246	0.472719	0.239163	0.276706			0.528456	0.263865	0.181784	0.292791	0.170388	0.427734	0.30591	0.96625	0.229614	0.385759	0.373524	0.172135	0.329123	0.957735	0.187011	0.415022	0.196096
0.34	0.268375	0.824917	0.439747	0.282725	0.16807	0.131552	0.245913	0.142613	0.271123	0.398944	0.490678	0.118461	0.148038	0.236739	0.190528	0.401106	0.305393	0.271819	0.23007	0.192691	0.340157	0.109444	0.402999	0.865366	0.350801	0.201472	0.402652	0.462301	0.247613	0.286081			0.481687	0.242065	0.227379	0.285414	0.162673	0.443901	0.306575	0.995405	0.228325	0.392918	0.356455	0.156958	0.337778	0.967054	0.202867	0.366817	0.190762
0.35	0.282215	0.842052	0.444828	0.289107	0.172311	0.129141	0.23572	0.131862	0.262517	0.370817	0.487507	0.126532	0.156091	0.23832	0.19063	0.381062	0.302266	0.254397	0.219262	0.185422	0.319182	0.1059	0.400527	0.829877	0.366591	0.21532	0.412186	0.464992	0.244068	0.290272			0.455107	0.228603	0.27367	0.279591	0.158585	0.454459	0.317857	0.956522	0.22892	0.412514	0.356084	0.151059	0.350364	0.98255	0.226921	0.313946	0.189575
0.36	0.293383	0.863649	0.438685	0.28313	0.164753	0.126019	0.23198	0.124219	0.246802	0.352583	0.468845	0.131905	0.161698	0.229612	0.189081	0.363936	0.296586	0.235665	0.20635	0.181286	0.301686	0.102362	0.394747	0.819041	0.372038	0.225114	0.409195	0.481838	0.232715	0.291822			0.443534	0.223223	0.353766	0.284792	0.155545	0.483836	0.348926	0.876427	0.234407	0.421468	0.3549	0.148936	0.360762	0.994845	0.242881	0.280846	0.192598
0.37	0.298951	0.879624	0.425309	0.27421	0.150702	0.124431	0.232759	0.121008	0.241652	0.344005	0.433836	0.133757	0.164229	0.219498	0.186997	0.347867	0.291014	0.218873	0.192672	0.17652	0.285684	0.0997221	0.39008	0.822507	0.364919	0.226894	0.402186	0.500174	0.228152	0.29383			0.434066	0.223947	0.494998	0.285519	0.148322	0.519352	0.395126	0.800699	0.237873	0.422825	0.356376	0.140125	0.37217	0.997316	0.242193	0.271116	0.200054
0.38	0.302364	0.876694	0.410592	0.264052	0.13851	0.123457	0.233978	0.119316	0.242561	0.340795	0.396639	0.133903	0.163581	0.216337	0.18087	0.345052	0.287672	0.208168	0.181436	0.172846	0.263904	0.0971225	0.398053	0.82718	0.357658	0.226789	0.395527	0.512215	0.227284	0.292779			0.433409	0.226127	0.645187	0.276873	0.137958	0.499983	0.41562	0.780698	0.238702	0.383883	0.366502	0.126763	0.390624	0.999665	0.247364	0.257393	0.200363
0.39	0.3091	0.856818	0.395637	0.248391	0.131237	0.122791	0.238452	0.117627	0.243308	0.340107	0.364166	0.133487	0.159972	0.217366	0.173772	0.349794	0.291531	0.20247	0.180471	0.169667	0.247119	0.0954345	0.42259	0.825784	0.344013	0.230881	0.398737	0.525295	0.223756	0.286662			0.409283	0.229693	0.789333	0.272878	0.127055	0.514816	0.444485	0.795242	0.237704	0.366955	0.37513	0.11753	0.413408	0.988103	0.263629	0.260591	0.194556
0.4	0.31818	0.828534	0.382848	0.227276	0.130626	0.122152	0.239078	0.120002	0.244909	0.344918	0.34181	0.136302	0.158299	0.2192	0.169688	0.356219	0.301354	0.194454	0.178312	0.166526	0.237485	0.0938724	0.458712	0.828535	0.328743	0.233693	0.415495	0.53026	0.221556	0.278416			0.38259	0.235642	0.885307	0.276396	0.115933	0.528026	0.47999	0.780136	0.236367	0.3929	0.376736	0.112881	0.430068	0.946267	0.287052	0.274588	0.187807
0.41	0.32463	0.790574	0.365389	0.205917	0.133351	0.119935	0.235297	0.128191	0.245931	0.35208	0.325587	0.144139	0.160232	0.213993	0.163941	0.363276	0.314769	0.181499	0.171452	0.16507	0.232681	0.0916416	0.486618	0.834447	0.321881	0.227606	0.445306	0.519929	0.22361	0.265581			0.403595	0.245138	0.946496	0.287987	0.108871	0.512573	0.508431	0.712999	0.234228	0.37708	0.379122	0.109958	0.44397	0.904856	0.303932	0.277147	0.179373
0.42	0.326227	0.744994	0.339883	0.192878	0.134033	0.11709	0.230899	0.137293	0.250297	0.355002	0.307116	0.154658	0.162392	0.208432	0.153644	0.367081	0.323944	0.170341	0.160227	0.16305	0.222927	0.0908174	0.501597	0.835198	0.329202	0.218225	0.469946	0.494266	0.22729	0.254706			0.423068	0.255499	0.995669	0.301101	0.105164	0.517734	0.498541	0.641411	0.232101	0.337184	0.381266	0.109697	0.463539	0.882277	0.290424	0.275995	0.171874
0.43	0.330189	0.693144	0.317355	0.194768	0.130155	0.115811	0.238124	0.144819	0.251128	0.344475	0.275355	0.1607	0.162908	0.205089	0.143164	0.363495	0.324354	0.162276	0.15181	0.162987	0.211756	0.0924746	0.512545	0.825257	0.345196	0.20959	0.479662	0.465615	0.229583	0.247104			0.449903	0.261623	0.982228	0.303925	0.103036	0.510522	0.474828	0.597063	0.22769	0.319707	0.379926	0.112734	0.485386	0.855822	0.286775	0.283829	0.161642
0.44	0.331867	0.645946	0.301808	0.198523	0.125723	0.115795	0.25021	0.152281	0.250049	0.324242	0.240963	0.160673	0.163609	0.201197	0.134723	0.36141	0.320675	0.153473	0.149346	0.1663	0.203964	0.0953139	0.522178	0.815463	0.365568	0.206983	0.461383	0.442859	0.229043	0.235235			0.490253	0.261746	0.902997	0.293966	0.102035	0.509392	0.47213	0.567569	0.222779	0.33318	0.360758	0.117656	0.501463	0.85312	0.307884	0.292427	0.151538
0.45	0.322903	0.605791	0.290998	0.197866	0.122532	0.113332	0.256597	0.160966	0.248856	0.305234	0.215542	0.154021	0.164303	0.19644	0.12703	0.361237	0.311102	0.143514	0.147356	0.170307	0.202487	0.100005	0.511287	0.807283	0.380885	0.209539	0.429905	0.432873	0.226861	0.219458			0.537235	0.25844	0.838659	0.280592	0.100822	0.465642	0.500584	0.535822	0.220389	0.367219	0.341678	0.121384	0.518686	0.893538	0.334423	0.289871	0.146071
0.46	0.301945	0.578101	0.286065	0.190534	0.118582	0.110121	0.264912	0.167105	0.249817	0.293723	0.200686	0.141938	0.162198	0.193371	0.123254	0.364824	0.303755	0.136361	0.145706	0.172748	0.202978	0.107685	0.47228	0.796423	0.388475	0.20849	0.395865	0.430702	0.221402	0.206565			0.560348	0.257977	0.801278	0.270044	0.0991058	0.433645	0.510253	0.487378	0.213844	0.400532	0.330789	0.122905	0.551026	0.922879	0.363542	0.286782	0.14468
0.47	0.284134	0.561833	0.286457	0.175282	0.114973	0.107425	0.275788	0.16815	0.253113	0.289149	0.197459	0.126487	0.155772	0.189596	0.122471	0.372257	0.301621	0.130216	0.145694	0.173121	0.201285	0.117203	0.419612	0.77984	0.394915	0.205665	0.375524	0.434997	0.21417	0.20221			0.548226	0.262741	0.783304	0.257848	0.0965415	0.440227	0.501827	0.433484	0.204418	0.433782	0.320565	0.119118	0.586589	0.883916	0.358657	0.296363	0.143169
0.48	0.280773	0.545883	0.289664	0.162881	0.114227	0.104882	0.288566	0.166633	0.255285	0.28447	0.199787	0.109854	0.148586	0.187966	0.123383	0.38471	0.297421	0.12869	0.145572	0.173236	0.204158	0.1217	0.366992	0.760921	0.406309	0.203398	0.373136	0.439153	0.207014	0.205991			0.512444	0.272861	0.739793	0.240526	0.0941147	0.441994	0.505056	0.399229	0.198194	0.432638	0.305883	0.115219	0.615119	0.81236	0.345148	0.304401	0.142239
0.49	0.286392	0.522778	0.299099	0.1559	0.11234	0.101335	0.303541	0.162598	0.25381	0.276988	0.204387	0.100848	0.142195	0.193011	0.124483	0.393881	0.294622	0.130334	0.149215	0.171901	0.214063	0.120185	0.325296	0.741649	0.421491	0.20197	0.379633	0.437706	0.199431	0.212132			0.497239	0.2859	0.692363	0.221591	0.0924197	0.408251	0.541823	0.375905	0.20452	0.414554	0.289896	0.113348	0.628964	0.754177	0.313065	0.329285	0.143854
0.5	0.294291	0.490858	0.308573	0.151296	0.104925	0.0976924	0.312415	0.157013	0.250727	0.267594	0.209626	0.0956603	0.139314	0.208251	0.126238	0.396937	0.292823	0.131081	0.150361	0.17002	0.226241	0.117844	0.297581	0.733394	0.431465	0.200925	0.38937	0.428693	0.192187	0.216453			0.485548	0.298152	0.628258	0.207804	0.0896349	0.397299	0.613184	0.35799	0.220364	0.422526	0.268334	0.11426	0.635775	0.703676	0.292954	0.337321	0.147395
0.51	0.301365	0.461122	0.315627	0.150703	0.0976641	0.0955723	0.318344	0.153617	0.249745	0.26025	0.212451	0.0937312	0.140164	0.217554	0.129814	0.390302	0.288923	0.130674	0.150644	0.169754	0.24253	0.115075	0.277912	0.744088	0.439399	0.199928	0.40638	0.40857	0.185318	0.218139			0.456894	0.307567	0.576114	0.20342	0.085407	0.405941	0.652716	0.334046	0.238206	0.421831	0.251739	0.117992	0.654224	0.647928	0.27822	0.333548	0.150388
0.52	0.299962	0.430657	0.322341	0.150301	0.0934384	0.0951231	0.320142	0.154082	0.246876	0.253052	0.209213	0.0930312	0.146724	0.217272	0.135192	0.387616	0.285693	0.124794	0.148797	0.167558	0.258997	0.114105	0.2668	0.770254	0.451224	0.208625	0.421615	0.380202	0.177103	0.222968			0.41807	0.314665	0.539815	0.205767	0.0810006	0.421735	0.646817	0.321312	0.256604	0.4319	0.24263	0.121348	0.697489	0.613952	0.27387	0.353041	0.152809
0.53	0.30342	0.400149	0.335081	0.146147	0.0947632	0.0944157	0.317724	0.15607	0.239653	0.244499	0.21001	0.0911764	0.155679	0.20756	0.138801	0.384418	0.280045	0.115914	0.147535	0.163219	0.275246	0.111752	0.264351	0.794303	0.471646	0.216706	0.429152	0.363458	0.167602	0.22756			0.3932	0.322508	0.530297	0.211311	0.0770975	0.440183	0.644871	0.328366	0.276129	0.454699	0.239024	0.1257	0.760371	0.592828	0.257176	0.398305	0.155919
0.54	0.319581	0.367683	0.353539	0.139143	0.0982083	0.0931642	0.314407	0.161862	0.2279	0.233097	0.211964	0.0893468	0.167099	0.197817	0.143602	0.385424	0.277176	0.108917	0.146377	0.162105	0.284631	0.109553	0.26756	0.802445	0.489385	0.22229	0.418353	0.363143	0.163015	0.22317			0.417387	0.33185	0.534776	0.213052	0.0761692	0.443063	0.632148	0.354189	0.296707	0.477603	0.237319	0.132279	0.815926	0.574973	0.252208	0.459515	0.155315
0.55	0.336745	0.336406	0.365874	0.134947	0.101944	0.0935812	0.30775	0.173361	0.215279	0.221712	0.218843	0.0893443	0.174398	0.190516	0.151365	0.390217	0.276006	0.10772	0.148413	0.161725	0.286648	0.108701	0.275636	0.797915	0.500941	0.23133	0.39203	0.369689	0.164201	0.214655			0.428237	0.340535	0.512757	0.212508	0.0779091	0.443857	0.594206	0.360628	0.317054	0.511389	0.237715	0.134636	0.84187	0.560551	0.278474	0.559316	0.15351
0.56	0.341126	0.305517	0.368753	0.136666	0.104089	0.0948443	0.298678	0.181609	0.209775	0.21664	0.229368	0.0910498	0.171962	0.185169	0.155084	0.394533	0.275082	0.111817	0.151207	0.15878	0.277214	0.108403	0.287981	0.788579	0.509406	0.243036	0.365868	0.369312	0.169207	0.209163			0.397843	0.344605	0.490461	0.208157	0.0793782	0.468125	0.548334	0.33965	0.336806	0.605932	0.236432	0.132006	0.824055	0.544844	0.296549	0.674723	0.152069
0.57	0.335394	0.278876	0.365446	0.143507	0.104601	0.0960478	0.29257	0.185839	0.207752	0.211573	0.233783	0.0943278	0.160318	0.18232	0.153356	0.398156	0.271367	0.120197	0.152014	0.154347	0.261657	0.108348	0.302882	0.771844	0.514317	0.25447	0.352456	0.361466	0.179824	0.209231			0.375256	0.339879	0.476427	0.205239	0.0804174	0.476089	0.534714	0.312395	0.347966	0.735887	0.235309	0.129608	0.796749	0.515988	0.30756	0.76318	0.151878
0.58	0.332485	0.253349	0.358693	0.15404	0.104515	0.0965495	0.282029	0.190481	0.208811	0.202875	0.233106	0.0983373	0.151032	0.182068	0.149876	0.400772	0.265767	0.130904	0.157667	0.149473	0.250969	0.108013	0.319455	0.752161	0.525215	0.261235	0.353638	0.35111	0.194976	0.215576			0.369567	0.32839	0.465737	0.206012	0.0804364	0.483355	0.557376	0.296397	0.354881	0.868605	0.239898	0.131606	0.782227	0.475964	0.311075	0.772254	0.154573
0.59	0.322511	0.227468	0.348331	0.1657	0.105818	0.0960979	0.271382	0.199618	0.213141	0.196719	0.221665	0.100665	0.148294	0.186306	0.148123	0.405129	0.262664	0.129913	0.166975	0.148968	0.245388	0.110056	0.334184	0.731364	0.531661	0.260854	0.368797	0.349552	0.211015	0.224657			0.378031	0.316115	0.445756	0.20834	0.0786914	0.465465	0.591112	0.28389	0.356637	0.96341	0.251072	0.134232	0.791822	0.446521	0.323306	0.740311	0.158889
0.6	0.315319	0.203597	0.328959	0.181921	0.10969	0.0941343	0.270285	0.218364	0.218284	0.195356	0.208263	0.100112	0.146629	0.198413	0.146001	0.404731	0.263699	0.124878	0.180626	0.153414	0.239312	0.11172	0.343947	0.711562	0.532411	0.263001	0.391692	0.355879	0.223043	0.232677			0.402938	0.310972	0.406245	0.208168	0.0777975	0.425623	0.616396	0.271067	0.345203	0.974919	0.267325	0.136769	0.81859	0.426246	0.348051	0.756766	0.164083
0.61	0.313967	0.187026	0.312992	0.191088	0.117497	0.089392	0.279808	0.239767	0.221874	0.192696	0.205705	0.0977339	0.144568	0.211984	0.144716	0.385301	0.267103	0.121461	0.190864	0.157583	0.223263	0.115138	0.340596	0.69325	0.534358	0.279055	0.406762	0.366654	0.230278	0.241202			0.413494	0.312463	0.371496	0.205134	0.0780791	0.410187	0.626842	0.262777	0.32508	0.98852	0.277246	0.13932	0.825824	0.415516	0.35134	0.818811	0.166481
0.62	0.318472	0.17598	0.298819	0.188344	0.128469	0.0854237	0.284399	0.250347	0.228009	0.189279	0.212797	0.0958111	0.143358	0.219624	0.144141	0.360993	0.267508	0.117199	0.191688	0.159686	0.206205	0.119909	0.331923	0.682226	0.540056	0.303712	0.411402	0.375908	0.235082	0.246489			0.394254	0.317531	0.356227	0.200629	0.0801404	0.40833	0.615647	0.255937	0.301912	0.991911	0.289229	0.141245	0.809046	0.402713	0.33218	0.83472	0.165075
0.63	0.328116	0.165873	0.289672	0.176383	0.139476	0.0839795	0.284775	0.242464	0.232752	0.191265	0.22467	0.0964105	0.141325	0.223092	0.141085	0.342813	0.266951	0.114651	0.196327	0.161315	0.202578	0.124814	0.328148	0.681121	0.5454	0.33284	0.421155	0.383908	0.232038	0.249975			0.3799	0.329929	0.333659	0.195823	0.0840925	0.40244	0.6101	0.252715	0.285144	0.934502	0.302884	0.142435	0.761	0.385805	0.349533	0.900642	0.162565
0.64	0.339859	0.156405	0.284593	0.161932	0.148196	0.0848374	0.284347	0.226704	0.233714	0.196174	0.234849	0.0978033	0.138619	0.223636	0.140218	0.334789	0.26696	0.115343	0.203599	0.160152	0.209215	0.129619	0.334595	0.675203	0.549478	0.353835	0.434278	0.384935	0.222818	0.253355			0.36993	0.352943	0.299353	0.188679	0.0887943	0.384975	0.635899	0.246075	0.282876	0.882283	0.315716	0.141305	0.698508	0.361813	0.385045	0.966143	0.159431
0.65	0.355848	0.149085	0.284299	0.149822	0.149733	0.0863637	0.282579	0.21307	0.233496	0.198888	0.243943	0.100377	0.138246	0.224893	0.139971	0.345629	0.265909	0.118431	0.199472	0.158574	0.213142	0.13073	0.338746	0.663369	0.561337	0.366053	0.456296	0.383066	0.209895	0.259748			0.352624	0.377414	0.258649	0.184668	0.092374	0.378098	0.662351	0.240072	0.287447	0.846675	0.312502	0.142266	0.645421	0.344456	0.395837	0.988698	0.155753
0.66	0.371459	0.143214	0.287143	0.140817	0.142182	0.0878838	0.283564	0.20415	0.230887	0.197275	0.252204	0.103808	0.139167	0.233067	0.138183	0.367474	0.264679	0.125448	0.184936	0.165686	0.211557	0.127552	0.336946	0.641021	0.579035	0.366145	0.484354	0.380436	0.198726	0.273095			0.342132	0.390377	0.222686	0.183586	0.0943947	0.36928	0.657036	0.235822	0.292325	0.820383	0.295002	0.147245	0.610783	0.334476	0.363613	0.995294	0.152765
0.67	0.380753	0.136899	0.280763	0.135066	0.136085	0.0901768	0.290012	0.200629	0.228462	0.193274	0.246766	0.106816	0.146357	0.234265	0.136865	0.384587	0.268065	0.135337	0.178864	0.176439	0.213541	0.119839	0.335923	0.612627	0.588309	0.360454	0.506267	0.371108	0.191082	0.284382			0.346283	0.39037	0.200087	0.185608	0.0954305	0.377534	0.634696	0.228648	0.300357	0.834143	0.281849	0.155859	0.584291	0.33435	0.361957	0.969376	0.152126
0.68	0.379213	0.131049	0.26213	0.131184	0.137052	0.0916847	0.29671	0.207023	0.229609	0.1942	0.235893	0.111176	0.155342	0.233916	0.13579	0.39291	0.270964	0.146965	0.178543	0.179132	0.212279	0.111894	0.350103	0.580655	0.573419	0.362547	0.524418	0.364959	0.188065	0.297433			0.383997	0.381718	0.183698	0.187844	0.0958826	0.379615	0.608305	0.220443	0.311766	0.861113	0.275099	0.16774	0.546147	0.341688	0.371334	0.899386	0.152711
0.69	0.378941	0.127411	0.24185	0.129561	0.144584	0.0929407	0.297136	0.218801	0.23295	0.197538	0.223136	0.1137	0.159697	0.234237	0.134001	0.380997	0.266059	0.156723	0.178329	0.177607	0.208052	0.110583	0.379467	0.547208	0.54803	0.375219	0.538581	0.360396	0.186937	0.321477			0.437446	0.374518	0.171	0.188639	0.0975241	0.384208	0.586612	0.216486	0.328314	0.880805	0.276719	0.181456	0.489617	0.360901	0.371957	0.819387	0.15235
0.7	0.38176	0.124518	0.231411	0.132487	0.154736	0.0937355	0.298681	0.223888	0.241591	0.194507	0.209953	0.115859	0.160839	0.226478	0.130347	0.365809	0.259617	0.166309	0.181103	0.179967	0.212212	0.112816	0.409797	0.515865	0.53237	0.389595	0.564634	0.355874	0.182889	0.354345			0.459071	0.375442	0.162227	0.186935	0.0995233	0.398192	0.563906	0.221272	0.345401	0.888953	0.2762	0.186983	0.433473	0.393111	0.371522	0.749705	0.153361
0.71	0.384183	0.121819	0.22753	0.137983	0.165842	0.0948153	0.308895	0.228852	0.255122	0.191713	0.191719	0.12166	0.164037	0.206289	0.127577	0.366329	0.253692	0.177405	0.179451	0.184576	0.226396	0.115466	0.432215	0.493344	0.530688	0.411011	0.57294	0.361457	0.179413	0.385737			0.466339	0.390726	0.15536	0.187578	0.101792	0.424857	0.537984	0.228874	0.354752	0.88286	0.27001	0.184883	0.38803	0.43972	0.385601	0.715609	0.15468
0.72	0.382905	0.122296	0.226658	0.147898	0.170984	0.0980004	0.313088	0.234501	0.275598	0.192223	0.173235	0.126811	0.166701	0.19252	0.127485	0.377237	0.249809	0.184686	0.174342	0.179165	0.246018	0.117999	0.444766	0.475292	0.549037	0.43828	0.557274	0.369432	0.177224	0.40728			0.445178	0.415013	0.149439	0.188188	0.103286	0.442006	0.521465	0.239977	0.357344	0.837737	0.264611	0.186353	0.358621	0.472939	0.393357	0.715144	0.157955
0.73	0.381345	0.126906	0.228126	0.160332	0.167064	0.103108	0.310194	0.24704	0.297759	0.196101	0.162141	0.13351	0.160038	0.184527	0.126511	0.396875	0.248689	0.188811	0.173117	0.17377	0.264221	0.124496	0.438727	0.461296	0.581415	0.467902	0.541317	0.372629	0.17701	0.414949			0.393137	0.436619	0.146393	0.181077	0.105821	0.489994	0.509017	0.250546	0.368806	0.744392	0.258755	0.18676	0.335076	0.494412	0.443361	0.670929	0.159538
0.74	0.377031	0.134568	0.233423	0.161364	0.162066	0.108484	0.295907	0.270408	0.311892	0.198052	0.156123	0.138563	0.147175	0.185204	0.127993	0.418607	0.255187	0.191395	0.174791	0.172772	0.281891	0.134534	0.415391	0.450495	0.618379	0.483874	0.544878	0.373548	0.179292	0.410012			0.342831	0.452496	0.14092	0.170992	0.109949	0.555308	0.506709	0.251161	0.395727	0.666046	0.245855	0.186352	0.304358	0.522549	0.499359	0.629171	0.155718
0.75	0.372957	0.139137	0.242141	0.149451	0.161421	0.112632	0.278855	0.293021	0.318467	0.194777	0.151027	0.138537	0.13757	0.186862	0.129187	0.442893	0.260737	0.19832	0.170909	0.180496	0.302156	0.149645	0.391459	0.44795	0.653422	0.482078	0.553578	0.377533	0.180402	0.397078			0.313264	0.46029	0.135923	0.164378	0.117201	0.617062	0.517746	0.24787	0.426542	0.616112	0.230257	0.189883	0.271245	0.548381	0.502264	0.608406	0.149914
0.76	0.37351	0.139114	0.254934	0.138509	0.160097	0.11331	0.276884	0.301819	0.32314	0.188436	0.147747	0.135759	0.134405	0.189944	0.129927	0.495123	0.26129	0.213287	0.160041	0.19731	0.32053	0.169036	0.378828	0.446731	0.673512	0.472358	0.555195	0.387322	0.179003	0.396363			0.309025	0.459638	0.132947	0.165924	0.126608	0.700486	0.524464	0.246916	0.466025	0.601589	0.213773	0.196995	0.24183	0.56667	0.4663	0.610404	0.148531
0.77	0.385688	0.137344	0.26683	0.134472	0.157617	0.114862	0.284201	0.295004	0.325414	0.183748	0.141567	0.133107	0.135634	0.190567	0.131074	0.573375	0.259829	0.232174	0.155728	0.222177	0.322573	0.191116	0.37286	0.447633	0.67269	0.469722	0.573799	0.407064	0.173852	0.406099			0.307046	0.456261	0.132026	0.175451	0.135222	0.805833	0.532253	0.247656	0.505402	0.620143	0.202729	0.197967	0.217396	0.543615	0.443904	0.651564	0.146256
0.78	0.392529	0.133004	0.268973	0.130664	0.155027	0.12201	0.298959	0.280548	0.322278	0.180457	0.133243	0.131477	0.136506	0.19651	0.12947	0.646708	0.257587	0.245958	0.155362	0.239963	0.312763	0.209224	0.371201	0.453927	0.6656	0.486106	0.604943	0.435148	0.171839	0.417557			0.30695	0.455534	0.133372	0.179166	0.14058	0.889946	0.559688	0.247302	0.529051	0.603278	0.194864	0.195524	0.197927	0.499466	0.424227	0.682982	0.143227
0.79	0.376865	0.127028	0.265296	0.126504	0.149861	0.131261	0.311705	0.273054	0.309367	0.179032	0.12785	0.129347	0.138755	0.199834	0.129403	0.691507	0.259395	0.248561	0.145946	0.249914	0.305941	0.222397	0.373371	0.462732	0.64238	0.527344	0.617918	0.453081	0.17281	0.418795			0.280987	0.4666	0.139838	0.172229	0.141101	0.917262	0.623635	0.247105	0.541866	0.550975	0.188734	0.186674	0.187933	0.466358	0.421857	0.684178	0.140367
0.8	0.359009	0.122041	0.261987	0.129465	0.139875	0.138954	0.310573	0.279231	0.291881	0.174561	0.127554	0.130883	0.139486	0.202404	0.132298	0.717312	0.265012	0.244211	0.141735	0.254721	0.307973	0.233615	0.377154	0.467283	0.607372	0.577276	0.601064	0.449594	0.178096	0.414311			0.267957	0.489402	0.154633	0.164255	0.142681	0.921747	0.718493	0.247142	0.53912	0.528528	0.186093	0.160614	0.17944	0.432198	0.415194	0.67022	0.139981
0.81	0.351812	0.116102	0.260479	0.137935	0.129573	0.142368	0.3056	0.294203	0.280923	0.16617	0.135327	0.133658	0.134667	0.208519	0.139021	0.728092	0.264764	0.23152	0.147607	0.259653	0.315812	0.247712	0.376279	0.464301	0.572064	0.639893	0.569112	0.430389	0.186734	0.396927			0.265835	0.520588	0.18204	0.154066	0.146954	0.857503	0.822075	0.24588	0.536773	0.539693	0.191973	0.139163	0.168655	0.400403	0.415515	0.635625	0.143176
0.82	0.35055	0.110322	0.258366	0.1473	0.123847	0.142449	0.301307	0.309563	0.2783	0.157883	0.145536	0.136454	0.126766	0.213835	0.152686	0.720315	0.260276	0.228244	0.162267	0.27715	0.32414	0.263228	0.37094	0.454292	0.552264	0.716529	0.534853	0.401432	0.198263	0.372966			0.261449	0.543868	0.204152	0.140579	0.153339	0.794915	0.876121	0.243498	0.540326	0.552733	0.199775	0.128462	0.158164	0.373096	0.404106	0.635326	0.147018
0.83	0.34427	0.104784	0.25656	0.155881	0.123687	0.145879	0.302896	0.321453	0.27886	0.149893	0.158071	0.138126	0.118369	0.219918	0.169614	0.708431	0.257978	0.238925	0.18329	0.298285	0.316473	0.289818	0.367446	0.440234	0.545695	0.781628	0.505802	0.368765	0.206847	0.34678			0.262562	0.561851	0.200952	0.126235	0.165019	0.768356	0.882831	0.242792	0.55342	0.589464	0.206937	0.125787	0.155026	0.35186	0.376258	0.661675	0.149539
0.84	0.336633	0.101282	0.251366	0.161259	0.12876	0.153489	0.313379	0.321248	0.275047	0.140713	0.169396	0.137939	0.11319	0.22103	0.183032	0.7103	0.261758	0.250384	0.213227	0.323664	0.298272	0.324835	0.3671	0.432483	0.548671	0.821054	0.489178	0.340986	0.209277	0.329717			0.277567	0.577751	0.210507	0.116296	0.178323	0.760776	0.916437	0.246686	0.602345	0.662036	0.209577	0.124622	0.152681	0.35253	0.384549	0.600597	0.146686
0.85	0.336534	0.0995761	0.244481	0.166145	0.135227	0.163272	0.321866	0.30918	0.262343	0.134712	0.17131	0.136006	0.110498	0.220999	0.193248	0.714932	0.270944	0.260643	0.263643	0.359719	0.276641	0.354574	0.368995	0.432637	0.554204	0.850729	0.490327	0.323395	0.206387	0.31631			0.310593	0.598842	0.225699	0.122151	0.185678	0.761246	0.973681	0.265852	0.694348	0.734032	0.205531	0.124835	0.141772	0.37906	0.422085	0.555005	0.140121
0.86	0.336539	0.0987968	0.23965	0.169034	0.143208	0.172436	0.325752	0.289664	0.248964	0.13647	0.16369	0.130613	0.10775	0.222352	0.201686	0.695117	0.28161	0.267521	0.345848	0.402973	0.266889	0.376376	0.364899	0.437333	0.556117	0.895942	0.506974	0.31405	0.201213	0.307397			0.334577	0.622796	0.238295	0.13623	0.184722	0.746478	0.999558	0.286038	0.800364	0.740557	0.200613	0.126043	0.12588	0.420886	0.409718	0.555454	0.135543
0.87	0.331599	0.0966875	0.240562	0.180752	0.158164	0.1799	0.327475	0.267516	0.250818	0.146989	0.152425	0.126776	0.106079	0.235464	0.215951	0.657496	0.287938	0.268938	0.459909	0.451317	0.273003	0.416565	0.362553	0.441457	0.557516	0.955923	0.516423	0.297162	0.202311	0.311933			0.352039	0.641871	0.272848	0.145976	0.180005	0.705496	0.966291	0.320707	0.879904	0.704115	0.202643	0.128241	0.113297	0.448432	0.40635	0.582434	0.134359
0.88	0.326586	0.0930488	0.245049	0.190424	0.180415	0.186001	0.326928	0.247107	0.271716	0.160508	0.145307	0.125991	0.105729	0.255916	0.239568	0.617608	0.286153	0.250569	0.607458	0.502894	0.289271	0.49044	0.37465	0.430938	0.568175	0.993823	0.500065	0.277189	0.207774	0.325061			0.367793	0.666223	0.3399	0.146563	0.177115	0.666532	0.900618	0.338074	0.916818	0.691671	0.218178	0.123902	0.104039	0.457094	0.466479	0.61151	0.13491
0.89	0.310927	0.0891231	0.246465	0.18489	0.195314	0.19666	0.325535	0.238826	0.304184	0.171303	0.146716	0.1239	0.104221	0.267689	0.26592	0.578201	0.279634	0.227873	0.726484	0.541725	0.314613	0.571285	0.392481	0.41145	0.590311	0.993418	0.469479	0.263441	0.205389	0.352033			0.401137	0.706439	0.420851	0.143939	0.173939	0.624245	0.857505	0.312593	0.955573	0.717546	0.240676	0.120544	0.0980211	0.448445	0.500175	0.603859	0.134146
0.9	0.28453	0.0882715	0.244994	0.159831	0.19818	0.211931	0.316034	0.23799	0.35024	0.175295	0.144934	0.117696	0.105812	0.276689	0.286454	0.552991	0.26951	0.209214	0.786536	0.566963	0.338758	0.659766	0.402137	0.389944	0.616015	0.961767	0.439057	0.263247	0.197481	0.392786			0.443897	0.774741	0.467392	0.149119	0.165719	0.590504	0.780732	0.284199	0.992949	0.775066	0.240312	0.118741	0.0945121	0.436257	0.478083	0.62512	0.135724
0.91	0.261887	0.085221	0.249118	0.138305	0.182931	0.237535	0.30571	0.236583	0.398518	0.17201	0.135113	0.11282	0.108752	0.304097	0.296436	0.523602	0.268399	0.18953	0.820485	0.619081	0.3602	0.750587	0.40553	0.372237	0.640268	0.895712	0.397167	0.270661	0.187298	0.427488			0.497488	0.87422	0.476977	0.160099	0.154848	0.545296	0.684595	0.283643	0.991258	0.801816	0.2387	0.119188	0.0925901	0.442042	0.51262	0.618168	0.137612
0.92	0.246543	0.078376	0.263708	0.142352	0.166686	0.273043	0.300343	0.228201	0.421751	0.172101	0.12144	0.115191	0.113763	0.341893	0.300107	0.489618	0.281681	0.172182	0.751999	0.723406	0.382273	0.804301	0.414093	0.361508	0.670969	0.829231	0.34535	0.272218	0.179066	0.436174			0.60044	0.966602	0.487855	0.167686	0.151883	0.479133	0.589103	0.313831	0.97022	0.743802	0.242403	0.11721	0.0893226	0.460413	0.56306	0.633535	0.125964
0.93	0.233699	0.0683185	0.284738	0.175094	0.156938	0.305265	0.300549	0.213591	0.408896	0.18452	0.109108	0.120941	0.11499	0.382008	0.307244	0.453808	0.306142	0.16142	0.612095	0.759377	0.387596	0.777047	0.431393	0.368485	0.730803	0.754094	0.286412	0.268006	0.170269	0.414891			0.753785	0.998917	0.534339	0.170753	0.162656	0.432162	0.514052	0.332964	0.951222	0.662803	0.248598	0.114386	0.0829604	0.469703	0.527704	0.674779	0.10091
0.94	0.213189	0.0587325	0.297412	0.197668	0.151386	0.319576	0.296038	0.183062	0.375038	0.192738	0.09537	0.125777	0.105383	0.416459	0.316818	0.413625	0.326835	0.155198	0.510911	0.637835	0.354079	0.694301	0.450969	0.388913	0.779106	0.629532	0.233751	0.259524	0.14985	0.370337			0.937407	0.932998	0.549014	0.191049	0.183677	0.41029	0.438257	0.312075	0.897958	0.669768	0.253473	0.114463	0.0711577	0.458971	0.528374	0.687972	0.0844357
0.95	0.181389	0.0491771	0.296488	0.180579	0.14721	0.320563	0.284019	0.136179	0.320618	0.189457	0.0803353	0.119023	0.0876207	0.408092	0.308899	0.364988	0.327218	0.149013	0.465384	0.437767	0.282179	0.56576	0.468696	0.418694	0.754329	0.451561	0.191986	0.246277	0.108092	0.310481			0.985577	0.755168	0.57073	0.223273	0.193912	0.412079	0.407392	0.292612	0.803618	0.699478	0.261764	0.11659	0.056822	0.41734	0.532165	0.689367	0.0805958
0.96	0.154365	0.0400798	0.276242	0.141134	0.131481	0.310045	0.257316	0.0798544	0.256289	0.187881	0.0647147	0.0998134	0.0642395	0.344051	0.270137	0.318342	0.294111	0.136377	0.403548	0.240315	0.1797	0.42186	0.473691	0.462034	0.630596	0.299759	0.161666	0.223944	0.0615925	0.229384			0.831768	0.523946	0.5676	0.226321	0.176293	0.404651	0.457642	0.279678	0.706798	0.703636	0.235656	0.113907	0.0387441	0.3438	0.585415	0.654064	0.0844691
0.97	0.128359	0.0329499	0.238789	0.1005	0.0895297	0.287791	0.205337	0.0357089	0.186192	0.165821	0.0511158	0.0698974	0.0390579	0.287996	0.205672	0.263596	0.226083	0.114836	0.336245	0.130727	0.0828186	0.27675	0.43586	0.482626	0.450367	0.180308	0.143294	0.187272	0.0299883	0.133714			0.577988	0.319438	0.47703	0.183497	0.128156	0.361347	0.557327	0.246701	0.624033	0.623733	0.166457	0.104292	0.0222272	0.24049	0.543546	0.614582	0.0868214
0.98	0.104383	0.0285922	0.190237	0.0654198	0.040198	0.259601	0.140883	0.01437	0.121211	0.105154	0.0385428	0.0410062	0.0181845	0.227136	0.134242	0.204558	0.141039	0.0896967	0.292366	0.0699212	0.0254803	0.171038	0.326652	0.441403	0.301316	0.0954935	0.132305	0.139346	0.013278	0.0626499			0.379361	0.180538	0.34544	0.122776	0.0792503	0.34008	0.60931	0.208919	0.551216	0.466784	0.102985	0.0939457	0.0109383	0.127974	0.2895	0.608051	0.0818644
0.99	0.0716242	0.0259014	0.138177	0.0369011	0.0168365	0.229392	0.0921041	0.00284616	0.0703451	0.0498877	0.0290668	0.0198658	0.00637164	0.16804	0.0754985	0.150324	0.075041	0.0683073	0.26147	0.0250928	0.00527535	0.115906	0.211363	0.339443	0.212602	0.0476075	0.129239	0.0923523	0.00309772	0.0230918			0.244733	0.0962061	0.213601	0.0780645	0.0444107	0.205334	0.497407	0.164985	0.488025	0.247752	0.0628726	0.0844471	0.00208622	0.0587591	0.0630241	0.500559	0.075838
1
[truncated: 50 more columns]
