# Supplementary material for: Microtubules restrict F-actin polymerization to the immune synapse via GEF-H1 to maintain polarity in lymphocytes
Source: eLife journal article supplement (doi:10.7554/elife.78330), 2022-09-16
Supplement: supp [file Figure6A.xlsx]

## Sheet: Sheet 1
Ratio acetyl alpha-tubulin/alpha-tubulin
0-5 min	15-20 min
0.477	0.537
0.593	0.602
0.577	1.213
0.498	0.665
0.433	0.676
0.45	0.74
0.481	0.628
0.5	0.489
0.489	1.306
0.506	0.739
0.685	0.499
0.457	0.534
0.555	0.523
0.695	0.655
	0.717
	0.67
	0.731
	0.637
0.543	0.519
0.581	0.548
0.808	0.561
0.58	0.958
0.361	0.627
0.307	0.408
0.455	0.481
0.452	0.541
0.413	0.5
0.262	0.413
0.446	0.618
0.444	0.479
0.397	0.576
0.45	0.674
0.44
0.73
0.478
0.395
0.445
0.668
