# Supplementary material for: Microtubules restrict F-actin polymerization to the immune synapse via GEF-H1 to maintain polarity in lymphocytes
Source: eLife journal article supplement (doi:10.7554/elife.78330), 2022-09-16
Supplement: supp [file Figure6B.xlsx]

## Sheet: Sheet 1
GEF-H1 enrichment
DMSO 0-5 min	DMSO 15-20min	Noco 15-20min
0.132	0.189	0.148
0.088	0.119	0.154
0.137	0.129	0.066
0.095	0.16	0.105
0.123	0.128	0.056
0.089	0.051	0.106
0.095	0.095	0.118
0.123	0.096	0.072
0.279	0.217	0.171
0.131	0.14	0.073
0.119	0.119	0.067
0.086	0.076	0.117
0.139	0.081	0.119
0.114	0.15	0.047
0.098	0.129	0.106
0.066	0.107	0.103
0.077	0.163	0.115
0.135	0.158	0.098
0.212	0.138	0.08
0.095	0.141
0.085	0.139	0.131
0.071	0.18	0.102
0.025	0.122	0.087
0.122	0.191	0.107
0.149	0.21	0.097
0.083	0.232	0.103
0.185	0.106	0.112
0.086	0.114	0.106
0.106	0.197	0.191
0.05	0.224	0.118
0.106	0.126	0.114
0.035	0.146	0.152
0.073	0.162	0.146
0.054	0.206	0.103
0.158	0.125	0.11
0.086	0.154	0.113
0.028	0.108	0.038
0.043	0.175	0.195
	0.117	0.123
	0.173	0.164
