# Supplementary material for: Microtubules restrict F-actin polymerization to the immune synapse via GEF-H1 to maintain polarity in lymphocytes
Source: eLife journal article supplement (doi:10.7554/elife.78330), 2022-09-16
Supplement: supp [file Figure6C_D.xlsx]

## Sheet: 6C GEF-H1
GEF-H1 enrichment
DMSO	SAHA
0.143	0.1
0.195	0.146
0.166	0.115
0.092	0.096
0.17	0.097
0.101	0.104
0.104	0.106
0.183	0.155
0.178	0.145
0.165	0.08
0.171	0.141
0.149	0.166
0.091	0.125
0.242	0.138
0.154	0.1
0.07	0.186
0.101	0.148
0.078	0.086
0.16	0.071
0.078	0.084
0.145	0.117
0.222
0.156
0.085	0.114
0.082	0.085
0.095	0.133
0.075	0.072
0.075	0.083
0.046	0.083
0.104	0.1
0.143	0.052
0.132	0.068
0.142	0.134
0.146	0.07
0.101	0.118
0.109	0.121
0.103	0.093
0.121	0.161
0.083	0.082
	0.086
	0.115
	0.111

## Sheet: 6D Actin
Ratio of actin in the front half of the cell (synapse side)/ in the back of the cell (away from the droplet)
DMSO	SAHA
3.10158	2.00812
3.11355	1.58251
1.83324	1.8803
1.36134	1.18536
1.62151	2.06605
0.835002	3.25383
2.44075	2.31496
2.64858	2.41894
2.31519	0.939182
1.47971	1.68114
2.56074	1.49769
1.90278	2.02076
2.33752	1.35313
1.87557	1.61897
0.928781	0.801659
3.25035	2.01897
1.94619	0.877397
1.16022	0.801747
1.46027	2.56926
1.42934	1.69344
2.90183	2.37393
1.75215
1.91965
1.17096	2.40501
2.14262	0.747558
2.293	0.743797
1.8964	0.553832
1.60151	0.897684
0.908619	0.909466
1.79005	0.996477
1.54285	1.56279
1.15207	1.1335
1.52113	0.729786
2.93202	0.754916
1.38228	1.04358
2.53282	1.36768
1.66784	1.35019
1.15636	1.5088
1.00032	0.765015
	1.38117
	4.09958
	2.28088
