# Supplementary material for: Microtubules restrict F-actin polymerization to the immune synapse via GEF-H1 to maintain polarity in lymphocytes
Source: eLife journal article supplement (doi:10.7554/elife.78330), 2022-09-16
Supplement: supp [file Figure6G_H.xlsx]

## Sheet: 6G Solidity
Solidity of the cell mask, at end point (2D)
siCtrl DMSO	siCtrl Noco	siArhgef2 DMSO	siArhgef2 Noco
0.935	0.902	0.96	0.973
0.968	0.953	0.88	0.947
0.868	0.947	0.94	0.97
0.929	0.866	0.967	0.943
0.969	0.902	0.967	0.937
0.962	0.975	0.968	0.945
0.969	0.883	0.958	0.969
0.954	0.867	0.9	0.966
0.939	0.866	0.974	0.886
0.959	0.885	0.97	0.901
0.965	0.923	0.966	0.856
0.959	0.863	0.937	0.912
0.976	0.923	0.976	0.957
0.92	0.937	0.974	0.906
0.936	0.932	0.974	0.968
0.973	0.972	0.947	0.891
0.965	0.898	0.971	0.954
0.968	0.853	0.906	0.955
0.971	0.946	0.949	0.97
0.891	0.741	0.971	0.954
0.954	0.912	0.928	0.897
0.973	0.928	0.948	0.951
0.907	0.944	0.964	0.966
0.966		0.942	0.925
0.941		0.94	0.966
0.97		0.968	0.955
0.964		0.976	0.854
0.957		0.953	0.954
0.974		0.972	0.928
0.949		0.971	0.801
0.966		0.843	0.962
0.957		0.969	0.914
0.934		0.962	0.963
0.91		0.943	0.895
0.969		0.928
0.959		0.957
0.913		0.966
0.933		0.933
		0.956
		0.97
		0.931
		0.919
		0.946
		0.961
		0.939
		0.891
		0.958
		0.969
		0.962
		0.956
		0.959
		0.936
		0.928
		0.952
		0.927
		0.898
		0.954
		0.968
		0.912
		0.945
		0.97
		0.924
		0.948
		0.971
		0.899

## Sheet: 6H Aspect Ratio
Aspect Ratio of the cell mask, at end point (2D)
siCtrl DMSO	siCtrl Noco	siArhgef2 DMSO	siArhgef2 Noco
1.266	2.104	1.039	1.045
1.043	1.422	1.177	1.042
1.1	1.54	1.063	1.029
1.218	1.844	1.026	1.06
1.109	1.673	1.033	1.03
1.141	1.013	1.073	1.156
1.023	1.778	1.085	1.12
1.317	1.911	1.039	1.076
1.093	1.506	1.032	1.244
1.052	1.763	1.09	1.597
1.011	1.287	1.073	1.269
1.108	1.55	1.244	1.094
1.045	1.62	1.016	1.144
1.123	1.326	1.072	1.448
1.074	1.052	1.106	1.013
1.013	1.007	1.084	1.423
1.12	2.46	1.177	1.035
1.029	1.452	1.372	1.01
1.017	1.388	1.215	1.247
1.119	2.036	1.126	1.021
1.038	1.259	1.084	1.435
1.01	1.143	1.033	1.058
1.062	1.329	1.125	1.023
1.129		1.031	1.404
1.048		1.059	1.019
1.277		1.027	1.065
1.07		1.059	1.679
1.029		1.034	1.047
1.017		1.073	1.181
1.065		1.112	1.534
1.043		1.096	1.019
1.028		1.019	1.47
1.096		1.123	1.032
1.038		1.526	2.14
1.021		1.328
1.124		1.101
1.06		1.056
1.073		1.077
		1.048
		1.024
		1.215
		1.266
		1.05
		1.062
		1.226
		1.586
		1.116
		1.094
		1.091
		1.136
		1.036
		1.084
		1.034
		1.141
		1.149
		1.069
		1.082
		1.05
		1.279
		1.026
		1.088
		1.196
		1.051
		1.056
		1.512
