# Supplementary material for: Microtubules restrict F-actin polymerization to the immune synapse via GEF-H1 to maintain polarity in lymphocytes
Source: eLife journal article supplement (doi:10.7554/elife.78330), 2022-09-16
Supplement: supp [file Figure6I.xlsx]

## Sheet: Sheet 1
Actin profile at the immune synapse, normalized to max
Distance from synapse center (µm)	siCtrl DMSO																			siCtrl Noco													siGEF Noco
-5	0.0146188	0.0094394	0.110678	0.058174	0	0.00699029	0.12131	0.0588569	0.0579652	0	0.00808878	0.0608531	0.0172185	0.382563	0.228377	0.0230683	0.340467	0.308477		0.0684667	0.0186756	0.189481	0.222022	0.00587544	0.0939733	0.0897196	0.00396767	0	0.0531627	0			0.0210642	0	0.00063371	0.0330244	0.0723035	0.0884326	0.132705	0.096191	0.179077
-4.96078	0.0172628	0.01218	0.123217	0.0667926	0	0.0104854	0.129705	0.0675866	0.0619266	0	0.0091001	0.0705145	0.0266294	0.391905	0.24393	0.0276817	0.359144	0.322817		0.0720816	0.0222256	0.204371	0.241173	0.00783431	0.0973621	0.0956383	0.00455129	0	0.0568282	0.00029134			0.0230598	0	0.00084474	0.0373219	0.0766767	0.0951238	0.142131	0.0984153	0.191489
-4.92157	0.019751	0.0152256	0.136187	0.0764883	0	0.0143686	0.137829	0.0763162	0.0660969	0	0.0103135	0.0790464	0.0330429	0.402581	0.257587	0.032872	0.378989	0.334926		0.075909	0.0267018	0.216378	0.260922	0.0105758	0.101301	0.101869	0.00490139	0	0.060495	0.00058355			0.0251664	0	0.00147845	0.0420719	0.0816324	0.101816	0.152284	0.100917	0.205673
-4.88235	0.0225504	0.0182704	0.150022	0.0880689	0	0.0182528	0.146223	0.0847645	0.0713094	0	0.0121335	0.0886449	0.0405716	0.413257	0.271244	0.0383503	0.405058	0.342575		0.0797363	0.0316405	0.224303	0.280072	0.0137097	0.105239	0.1081	0.005485	0	0.0637026	0.00145844			0.0274946	0	0.00253485	0.0472746	0.0868802	0.109464	0.161711	0.103976	0.220745
-4.84314	0.0253498	0.0213152	0.163856	0.102343	0	0.022913	0.153804	0.0940577	0.0769391	0	0.0135488	0.0986198	0.0482399	0.424822	0.285281	0.0441177	0.435797	0.347992		0.0833513	0.0365797	0.232709	0.297726	0.0176263	0.110002	0.114642	0.00641837	0	0.0669116	0.00233333			0.0299335	0	0.00443599	0.0527032	0.0924201	0.116634	0.170412	0.107867	0.236702
-4.80392	0.028305	0.024665	0.177259	0.120119	0	0.0279612	0.161657	0.103914	0.0831943	0	0.0159755	0.108846	0.0565353	0.439947	0.300455	0.0510381	0.470428	0.352454		0.0869655	0.0412101	0.246878	0.31538	0.0219354	0.11678	0.121807	0.00770218	0	0.070577	0.00408311			0.0323724	0	0.00654816	0.0583578	0.0979592	0.125239	0.179114	0.112038	0.254434
-4.76471	0.0312597	0.0283191	0.191093	0.142203	0	0.0333985	0.169781	0.112926	0.0892412	0.00079689	0.0186049	0.120326	0.0652492	0.460409	0.316388	0.0591116	0.505059	0.357553		0.0912184	0.0455316	0.271614	0.333034	0.027027	0.121451	0.129283	0.008986	0	0.0742439	0.00554068			0.0350331	0	0.00929468	0.064465	0.103498	0.133843	0.189267	0.116764	0.273051
-4.72549	0.0342145	0.0319732	0.205361	0.166173	0	0.0396117	0.178446	0.122219	0.0954964	0.00199164	0.0214356	0.132622	0.0748693	0.483986	0.332701	0.0689161	0.538911	0.364245		0.0956836	0.0496989	0.299472	0.350689	0.0317274	0.125664	0.13676	0.0102695	0	0.0779107	0.00787402			0.0376939	0	0.0120406	0.0705723	0.109621	0.142447	0.200869	0.12149	0.292553
-4.68627	0.037325	0.0365408	0.220925	0.192566	0	0.0454369	0.187923	0.13123	0.102168	0.00398208	0.0238623	0.145671	0.0849773	0.506673	0.350531	0.0798728	0.567315	0.373167		0.100574	0.0544839	0.330452	0.368342	0.036819	0.130518	0.14486	0.0106196	0	0.0811183	0.0102074			0.0401331	0	0.0149981	0.0771321	0.115161	0.152008	0.213922	0.126216	0.312944
-4.64706	0.0404356	0.0414126	0.235625	0.217883	0	0.0516501	0.199025	0.140242	0.108841	0.00756631	0.027907	0.159975	0.0964795	0.526245	0.36874	0.0916955	0.592607	0.384321		0.10589	0.0603487	0.35927	0.385099	0.0426945	0.136747	0.153894	0.0119034	0	0.0847851	0.0131234			0.0429047	0.00032782	0.0185887	0.0839179	0.1207	0.162046	0.228426	0.130665	0.334221
-4.60784	0.0435457	0.047503	0.251189	0.243469	0	0.0578645	0.211752	0.149254	0.116347	0.0119474	0.0317491	0.17547	0.108818	0.54226	0.388088	0.103229	0.617509	0.397706		0.111843	0.06714	0.376081	0.400958	0.0489624	0.144807	0.163551	0.0130703	0	0.0879927	0.0154567			0.045898	0.00049148	0.0228137	0.0909296	0.126239	0.172562	0.24293	0.134556	0.354609
-4.56863	0.0466563	0.0538977	0.267617	0.267978	0	0.0648548	0.225833	0.15911	0.12427	0.0179212	0.0361984	0.19266	0.121297	0.552047	0.407056	0.115917	0.635408	0.413958		0.118435	0.0759376	0.39049	0.414123	0.0556205	0.154058	0.174766	0.0149377	0	0.0921174	0.0180814			0.0492239	0.00098296	0.0274607	0.098168	0.132361	0.184513	0.258159	0.138171	0.375886
-4.52941	0.0499223	0.06151	0.285344	0.291947	0	0.071456	0.241538	0.169248	0.13261	0.0250896	0.0408492	0.210038	0.134054	0.556051	0.426404	0.128605	0.645914	0.431485		0.125027	0.0861244	0.408021	0.424895	0.0622797	0.164682	0.186293	0.0162212	0	0.0966999	0.0209974			0.0529932	0.00180226	0.0323194	0.105858	0.138776	0.19694	0.275563	0.141507	0.397162
-4.4902	0.0533436	0.0697317	0.305231	0.31457	0	0.0792233	0.259139	0.179949	0.142619	0.0314612	0.0455005	0.227541	0.147578	0.55872	0.446509	0.141869	0.653308	0.450924		0.131405	0.0972372	0.427954	0.434171	0.0693302	0.177597	0.199065	0.017505	0	0.101742	0.0244969			0.0570954	0.0032767	0.0369664	0.113549	0.145481	0.211281	0.295142	0.144565	0.417553
-4.45098	0.0569207	0.0782585	0.326848	0.335847	0	0.0866016	0.279177	0.192058	0.153253	0.0390287	0.0503539	0.245671	0.16152	0.561833	0.47003	0.155132	0.664591	0.471638		0.137997	0.108967	0.446205	0.442848	0.076772	0.191885	0.213707	0.0186718	0	0.106783	0.0279965			0.0617518	0.00540629	0.0420361	0.121466	0.153061	0.226578	0.318346	0.148179	0.437056
-4.41176	0.0609644	0.0867844	0.350195	0.359547	0	0.094369	0.300569	0.204449	0.164304	0.0469928	0.0554093	0.263425	0.17602	0.567171	0.49393	0.168397	0.683658	0.494902		0.144163	0.122241	0.460375	0.450329	0.0846063	0.207547	0.230218	0.0208894	0	0.111824	0.0312047			0.0668514	0.00802736	0.0473175	0.130061	0.161224	0.243786	0.345178	0.152627	0.455673
-4.37255	0.0653188	0.0959196	0.378297	0.387557	0	0.102524	0.32196	0.217403	0.175146	0.0545603	0.0618807	0.280615	0.191007	0.574734	0.523899	0.181661	0.713229	0.521351		0.149692	0.136595	0.470942	0.456912	0.0936157	0.223301	0.249222	0.0222898	0	0.117323	0.0347043			0.0711752	0.0113041	0.053443	0.139109	0.170554	0.261472	0.379986	0.157354	0.473404
-4.33333	0.0698291	0.105055	0.406398	0.418798	0.00041232	0.111457	0.343081	0.230358	0.185988	0.0633214	0.0671387	0.296989	0.206065	0.582741	0.551972	0.196079	0.756809	0.546527		0.156071	0.151566	0.48439	0.461999	0.103016	0.23704	0.268848	0.0246235	0	0.122823	0.0382038			0.0754989	0.0139251	0.0591464	0.148383	0.180758	0.279637	0.415518	0.162913	0.499114
-4.29412	0.0743389	0.11419	0.448768	0.461352	0.00061817	0.120388	0.364744	0.248381	0.196831	0.0716846	0.0732055	0.312798	0.222029	0.592971	0.580425	0.211073	0.817509	0.570427		0.16245	0.166538	0.496878	0.467085	0.113592	0.249405	0.289408	0.0270742	0.00113115	0.128322	0.0417034			0.0797119	0.0167103	0.0652725	0.158335	0.19242	0.298279	0.448875	0.169308	0.534574
-4.2549	0.078538	0.123934	0.474708	0.512793	0.0014422	0.129708	0.386136	0.268375	0.20809	0.0804456	0.0806876	0.328419	0.23862	0.606762	0.610015	0.226067	0.881323	0.598152		0.168616	0.181046	0.509126	0.470676	0.123776	0.259022	0.309657	0.0295249	0.00339174	0.134281	0.048119			0.0843682	0.0201507	0.0713986	0.168966	0.204665	0.318833	0.481507	0.176258	0.585992
-4.21569	0.0830482	0.134592	0.48984	0.56154	0.00226684	0.139418	0.409965	0.290341	0.218515	0.0892079	0.0883723	0.344856	0.255908	0.623665	0.638846	0.241349	0.938521	0.625239		0.174144	0.196018	0.518012	0.473669	0.134744	0.264059	0.329907	0.0334929	0.00565234	0.140238	0.0603675			0.0890245	0.0244104	0.0779468	0.179824	0.21691	0.3413	0.512691	0.183486	0.643617
-4.17647	0.088025	0.145554	0.506268	0.605979	0.0039149	0.149903	0.43948	0.314278	0.228941	0.0975711	0.0964611	0.361355	0.273614	0.644573	0.668057	0.25692	0.979766	0.641173		0.178822	0.211916	0.523055	0.476062	0.146495	0.266716	0.349533	0.0402614	0.00904409	0.146655	0.0737822			0.0932371	0.0307996	0.0844949	0.190907	0.229446	0.367113	0.539521	0.191549	0.703013
-4.13725	0.0933126	0.157125	0.527021	0.654996	0.00535772	0.161165	0.469537	0.346381	0.239783	0.10673	0.104955	0.378984	0.292715	0.66637	0.691198	0.271626	1	0.645634		0.182011	0.229048	0.529539	0.476062	0.160203	0.268181	0.370093	0.0418953	0.0146981	0.152612	0.0866142			0.0971175	0.0393185	0.0927332	0.202669	0.242565	0.397228	0.5591	0.198776	0.758864
-4.09804	0.0993779	0.169305	0.550367	0.698627	0.00886029	0.173204	0.499052	0.390031	0.251042	0.116288	0.116481	0.397052	0.312792	0.688612	0.709788	0.288062	0.998443	0.639898		0.185626	0.245562	0.542988	0.475763	0.174304	0.268914	0.390654	0.0432957	0.0203505	0.159487	0.0982791			0.100887	0.0507862	0.100971	0.216014	0.255685	0.43499	0.577229	0.206005	0.803191
-4.05882	0.106532	0.182095	0.583658	0.73283	0.0117453	0.186408	0.526672	0.434807	0.262719	0.125846	0.131446	0.414492	0.333496	0.707296	0.725721	0.309401	0.990272	0.631293		0.189666	0.26254	0.564121	0.476661	0.189189	0.27102	0.409346	0.0446961	0.027134	0.165903	0.10907			0.104545	0.0637289	0.110477	0.23117	0.268513	0.469407	0.596808	0.212955	0.837766
-4.01961	0.114463	0.195493	0.599654	0.754377	0.0173089	0.201941	0.551314	0.466629	0.274812	0.136998	0.140748	0.43256	0.355455	0.722866	0.738998	0.33391	0.97821	0.628425		0.194557	0.281062	0.595581	0.477857	0.204465	0.273127	0.424922	0.0464466	0.0356133	0.173236	0.119569			0.108204	0.0783091	0.121039	0.247907	0.280758	0.487572	0.617114	0.219349	0.861702
-3.98039	0.123639	0.208892	0.608301	0.762994	0.0218419	0.219806	0.574059	0.474232	0.287531	0.148148	0.151264	0.452259	0.378599	0.733986	0.753793	0.361304	0.964981	0.633525		0.200723	0.302516	0.635927	0.477558	0.221308	0.27505	0.436449	0.0483137	0.0446574	0.180568	0.131817			0.112306	0.0914154	0.132023	0.267134	0.292128	0.496654	0.635967	0.225188	0.879434
-3.94118	0.133282	0.222899	0.618677	0.758685	0.028436	0.238058	0.594909	0.478739	0.301501	0.160493	0.161577	0.473087	0.403485	0.736655	0.76745	0.385525	0.9607	0.643403		0.207952	0.328291	0.684198	0.477558	0.239718	0.276882	0.445483	0.0504143	0.0565285	0.188359	0.144648			0.11663	0.105177	0.143853	0.286135	0.299125	0.503346	0.651922	0.230748	0.893617
-3.90196	0.144013	0.237515	0.629918	0.751414	0.0356482	0.256699	0.615218	0.486342	0.315471	0.173636	0.170677	0.493601	0.431021	0.736655	0.779211	0.402249	0.961089	0.650414		0.215819	0.356691	0.735351	0.478456	0.261261	0.278806	0.451713	0.0530985	0.0695308	0.197526	0.16098			0.121397	0.116317	0.157795	0.305587	0.302624	0.509082	0.666424	0.236864	0.909574
-3.86275	0.155054	0.253045	0.642023	0.747913	0.0414177	0.277282	0.635798	0.49479	0.328816	0.187177	0.17816	0.514241	0.462042	0.73799	0.789454	0.414937	0.965758	0.652326		0.225813	0.385399	0.774256	0.479354	0.287505	0.281645	0.454517	0.0558993	0.0814019	0.20715	0.179936			0.126164	0.127457	0.175539	0.325718	0.304373	0.514341	0.676577	0.243814	0.920213
-3.82353	0.168896	0.269793	0.654562	0.748182	0.0500721	0.299806	0.654482	0.502112	0.341326	0.19992	0.186451	0.535257	0.499547	0.741993	0.79742	0.429066	0.965758	0.647228		0.236445	0.410557	0.79683	0.479952	0.320799	0.28595	0.454829	0.0589332	0.0921418	0.218607	0.199184			0.13204	0.139089	0.191804	0.347659	0.302624	0.520077	0.680928	0.25132	0.925532
-3.78431	0.18056	0.288063	0.666667	0.746835	0.0589324	0.326991	0.672624	0.50887	0.352794	0.215452	0.194944	0.555772	0.54214	0.747331	0.801214	0.44233	0.952918	0.634481		0.245375	0.432011	0.801633	0.480251	0.356835	0.292086	0.454206	0.0619676	0.105144	0.231898	0.216973			0.137361	0.153997	0.199831	0.371636	0.298251	0.525813	0.679477	0.258827	0.923758
-3.7451	0.18787	0.307552	0.679205	0.745758	0.0675868	0.360388	0.692391	0.513094	0.363845	0.232178	0.204247	0.577415	0.592123	0.755783	0.804249	0.454152	0.933073	0.617272		0.251116	0.450532	0.782421	0.482047	0.38582	0.298223	0.452336	0.0651185	0.118711	0.246105	0.231555			0.142018	0.171199	0.204056	0.397647	0.293003	0.531549	0.675126	0.265777	0.922872
-3.70588	0.194401	0.331303	0.693039	0.750337	0.0752114	0.395729	0.714595	0.514784	0.375521	0.250099	0.212538	0.598871	0.64099	0.765124	0.804249	0.473183	0.911284	0.601338		0.253455	0.465813	0.75	0.484441	0.406189	0.305642	0.449844	0.0683859	0.132278	0.260311	0.244094			0.145565	0.189548	0.208492	0.422755	0.288046	0.536329	0.66715	0.270503	0.926418
-3.66667	0.202022	0.359927	0.709036	0.763264	0.0855139	0.424855	0.737612	0.516756	0.38824	0.269614	0.22002	0.621016	0.677937	0.774912	0.803869	0.494522	0.889105	0.590504		0.25388	0.478932	0.709414	0.487134	0.428123	0.312328	0.446729	0.0718869	0.14641	0.274977	0.255759			0.149889	0.209535	0.21504	0.444695	0.28484	0.539675	0.657722	0.275507	0.932625
-3.62745	0.210731	0.394031	0.729789	0.787503	0.095817	0.446991	0.759275	0.520135	0.400334	0.291915	0.227301	0.644166	0.707006	0.784698	0.799697	0.50519	0.866148	0.585404		0.25388	0.487884	0.668107	0.490126	0.452018	0.318923	0.443925	0.0752713	0.161673	0.291018	0.267133			0.155211	0.226409	0.224757	0.463244	0.281924	0.542543	0.647571	0.28079	0.941489
-3.58824	0.220062	0.434835	0.753999	0.819283	0.10509	0.461747	0.783645	0.522951	0.409508	0.3182	0.234581	0.669448	0.736215	0.797599	0.795523	0.510958	0.841245	0.584768		0.254093	0.492823	0.633766	0.490724	0.472777	0.32506	0.440498	0.0791224	0.176935	0.307057	0.281423			0.159978	0.240171	0.238699	0.477946	0.281049	0.54589	0.638869	0.285794	0.945035
-3.54902	0.22675	0.47838	0.779075	0.849717	0.113126	0.474175	0.807203	0.524359	0.416805	0.344883	0.242467	0.701882	0.767236	0.811388	0.793626	0.515859	0.81284	0.587954		0.25388	0.492514	0.611432	0.489527	0.486878	0.333394	0.436137	0.0835571	0.193894	0.32264	0.300379			0.163304	0.252785	0.255598	0.487673	0.281633	0.547801	0.633067	0.291354	0.944149
-3.5098	0.229394	0.524665	0.80415	0.870725	0.120544	0.487378	0.826158	0.526049	0.424521	0.373955	0.249747	0.74128	0.799024	0.823843	0.797799	0.521338	0.782879	0.592416		0.253455	0.490199	0.606148	0.489228	0.497062	0.343928	0.431776	0.0878749	0.214245	0.337305	0.326043			0.165189	0.258191	0.267638	0.491291	0.281633	0.549235	0.628716	0.299694	0.941489
-3.47059	0.231882	0.570036	0.8262	0.880958	0.12858	0.500971	0.841863	0.527175	0.432235	0.406213	0.257028	0.776035	0.830951	0.838523	0.804628	0.523644	0.756031	0.599745		0.252817	0.486649	0.618396	0.491622	0.507638	0.356384	0.428349	0.0925428	0.239118	0.348763	0.356955			0.167184	0.268185	0.274609	0.493101	0.280175	0.549713	0.630167	0.310536	0.937944
-3.43137	0.234059	0.608404	0.84479	0.883382	0.137235	0.514952	0.860547	0.526894	0.438699	0.444047	0.263903	0.804831	0.867201	0.857206	0.811077	0.525952	0.736964	0.608031		0.252392	0.486186	0.642651	0.495213	0.516647	0.367192	0.427414	0.0973276	0.27134	0.359303	0.389618			0.169512	0.282438	0.282003	0.494232	0.277843	0.550192	0.633791	0.321379	0.937056
-3.39216	0.236081	0.639464	0.860787	0.883652	0.148362	0.528932	0.874086	0.524077	0.443494	0.480287	0.270576	0.829988	0.901499	0.882118	0.818285	0.529989	0.726848	0.614085		0.252605	0.491125	0.673391	0.499401	0.524873	0.382396	0.428037	0.102346	0.314868	0.368927	0.420239			0.172838	0.309305	0.29003	0.495589	0.276385	0.550192	0.638869	0.329719	0.939715
-3.35294	0.237169	0.665652	0.874189	0.877996	0.161756	0.543301	0.880314	0.51929	0.448916	0.518121	0.278463	0.845232	0.922273	0.907474	0.829287	0.538062	0.720622	0.619503		0.252605	0.503473	0.706292	0.502693	0.531924	0.400165	0.429907	0.107014	0.370265	0.379011	0.452318			0.177383	0.341088	0.298902	0.497173	0.276094	0.552104	0.644669	0.335279	0.943263
-3.31373	0.238258	0.683009	0.884134	0.871532	0.177622	0.554175	0.885459	0.515348	0.456005	0.57268	0.286755	0.849247	0.933426	0.935943	0.844461	0.548443	0.71751	0.623327		0.252179	0.521531	0.735831	0.504488	0.53819	0.413354	0.433645	0.111915	0.425664	0.389093	0.484689			0.183038	0.380734	0.307351	0.499887	0.277843	0.555449	0.655546	0.338338	0.940604
-3.27451	0.239036	0.69732	0.891482	0.865069	0.192046	0.563496	0.889791	0.51225	0.464345	0.619275	0.293428	0.849686	0.943534	0.967972	0.860773	0.561996	0.713618	0.623327		0.252179	0.550548	0.760567	0.504189	0.544066	0.425169	0.436449	0.1174	0.468626	0.401009	0.516477			0.188138	0.415793	0.316223	0.503506	0.281341	0.56023	0.668599	0.342229	0.929965
-3.23529	0.239036	0.710414	0.895374	0.858874	0.208943	0.570097	0.895749	0.511687	0.472894	0.64994	0.298483	0.84862	0.952457	0.991548	0.874051	0.571511	0.705837	0.620141		0.252817	0.589906	0.778098	0.503591	0.5472	0.434695	0.439564	0.124402	0.496891	0.412008	0.551181			0.192239	0.453473	0.326785	0.507577	0.286881	0.56501	0.680928	0.346122	0.911348
-3.19608	0.238725	0.723203	0.897104	0.852949	0.227076	0.576311	0.903872	0.515629	0.482902	0.66149	0.303337	0.847867	0.95894	1	0.885432	0.581603	0.69572	0.618865		0.254093	0.635746	0.78146	0.503591	0.547591	0.443305	0.441745	0.133504	0.526285	0.421173	0.589968			0.195787	0.480832	0.340515	0.510518	0.293878	0.568834	0.687454	0.349736	0.897162
-3.15686	0.237325	0.735383	0.90013	0.845677	0.248918	0.58369	0.913891	0.523232	0.493328	0.664675	0.308797	0.847365	0.965772	0.992883	0.895296	0.590253	0.684825	0.626513		0.255369	0.687606	0.778579	0.50389	0.546416	0.454296	0.442991	0.145408	0.55455	0.431714	0.631671			0.199335	0.502293	0.358682	0.512327	0.301458	0.570268	0.691081	0.352794	0.886524
-3.11765	0.235926	0.744214	0.904021	0.837328	0.272615	0.591845	0.924722	0.529991	0.50417	0.668259	0.318099	0.847742	0.971488	0.974644	0.901365	0.595444	0.677043	0.642447		0.25707	0.740238	0.771614	0.504189	0.546416	0.46776	0.441433	0.155911	0.570944	0.44363	0.674249			0.201663	0.521133	0.381496	0.514137	0.309038	0.569789	0.691805	0.353906	0.882093
-3.07843	0.234681	0.74665	0.907047	0.832211	0.296724	0.598447	0.932575	0.536468	0.513345	0.672243	0.328008	0.84931	0.976786	0.957295	0.904021	0.595156	0.673541	0.664754		0.258346	0.790863	0.777378	0.506882	0.545632	0.483056	0.439876	0.165597	0.569813	0.457379	0.71741			0.202993	0.550131	0.412336	0.514816	0.317784	0.568355	0.693256	0.355852	0.878545
-3.03922	0.234215	0.73782	0.909209	0.838944	0.319184	0.60233	0.939616	0.543791	0.521267	0.678614	0.33731	0.851506	0.981317	0.941281	0.907815	0.592272	0.670817	0.693754		0.260047	0.838246	0.79659	0.515859	0.54485	0.493589	0.438941	0.174816	0.57264	0.470669	0.752115			0.20388	0.579128	0.444444	0.516173	0.325948	0.5674	0.694705	0.360578	0.875
-3	0.234526	0.721071	0.912668	0.850794	0.345147	0.605048	0.946927	0.548577	0.52794	0.685385	0.347826	0.853827	0.984664	0.927492	0.917678	0.589965	0.66965	0.731358		0.261961	0.880846	0.82757	0.533513	0.546025	0.5	0.438007	0.181818	0.569248	0.483502	0.777778			0.204989	0.61517	0.472328	0.517303	0.332945	0.565487	0.695432	0.369197	0.870566
-2.96078	0.234992	0.705542	0.917856	0.864799	0.384298	0.608933	0.953696	0.549704	0.535029	0.689367	0.357533	0.85665	0.988289	0.917705	0.934749	0.589388	0.670427	0.770236		0.264512	0.915728	0.85855	0.560144	0.550725	0.50577	0.438318	0.185553	0.574336	0.492209	0.804899			0.207095	0.653342	0.493663	0.52047	0.336735	0.562619	0.696881	0.376981	0.867021
-2.92157	0.235303	0.695493	0.923476	0.881766	0.410262	0.614758	0.959653	0.548577	0.543161	0.690959	0.363599	0.860602	0.991635	0.911033	0.956753	0.5891	0.673541	0.797641		0.266851	0.941812	0.878002	0.588869	0.555817	0.511907	0.439564	0.188937	0.582815	0.497709	0.822689			0.2102	0.699214	0.507816	0.523185	0.339359	0.56023	0.699783	0.385321	0.865247
-2.88235	0.235459	0.687576	0.927799	0.897926	0.440346	0.622913	0.965611	0.550267	0.553169	0.692154	0.366026	0.865747	0.994284	0.906584	0.979893	0.588812	0.676654	0.811026		0.268764	0.961414	0.884966	0.611909	0.558951	0.522074	0.443614	0.195122	0.590164	0.505041	0.832896			0.213969	0.724443	0.515209	0.525446	0.343441	0.561664	0.704134	0.394218	0.860816
-2.84314	0.235926	0.682704	0.932123	0.906005	0.461776	0.630292	0.966152	0.558715	0.567973	0.693349	0.365419	0.871079	0.996236	0.90258	0.995827	0.59083	0.678988	0.816444		0.270678	0.980244	0.889289	0.625075	0.560517	0.535354	0.448598	0.203641	0.603731	0.516499	0.845144			0.218625	0.7346	0.526405	0.52703	0.353062	0.569789	0.712836	0.401724	0.854609
-2.80392	0.237169	0.681182	0.93904	0.901697	0.480734	0.636505	0.963444	0.575894	0.586322	0.695738	0.363195	0.876098	0.997978	0.895019	1	0.595156	0.679377	0.820905		0.273655	0.993363	0.892891	0.631059	0.562476	0.555047	0.454517	0.216711	0.631429	0.527498	0.858851			0.223281	0.734928	0.538657	0.529066	0.369096	0.587477	0.722986	0.407284	0.84929
-2.76471	0.238414	0.683009	0.945957	0.891732	0.500309	0.64	0.961549	0.600676	0.610091	0.698527	0.361577	0.881305	0.998257	0.884342	0.992412	0.598328	0.677431	0.828872		0.279396	1	0.898175	0.637044	0.566001	0.580601	0.461682	0.236784	0.663651	0.539872	0.87285			0.227384	0.7269	0.547951	0.531102	0.392711	0.616635	0.73459	0.409786	0.844859
-2.72549	0.238725	0.688185	0.951578	0.878534	0.52586	0.640389	0.962903	0.629963	0.636572	0.700916	0.361779	0.886387	0.998675	0.871886	0.978755	0.600923	0.675097	0.839388		0.287901	0.993209	0.902257	0.650808	0.570702	0.612109	0.466979	0.261291	0.699264	0.552246	0.885098			0.229823	0.71789	0.554922	0.533137	0.423615	0.652964	0.745468	0.413122	0.841311
-2.68627	0.23888	0.696406	0.953739	0.86049	0.553678	0.638447	0.964257	0.658688	0.664721	0.706093	0.363599	0.89059	0.998745	0.858541	0.966236	0.601499	0.674319	0.849586		0.301084	0.978392	0.90658	0.672651	0.576968	0.64151	0.469782	0.290466	0.71905	0.568286	0.897638			0.230155	0.705603	0.564428	0.535852	0.459767	0.698853	0.751268	0.420907	0.840426
-2.64706	0.240435	0.707064	0.952442	0.843792	0.561302	0.638447	0.96182	0.684595	0.694954	0.715651	0.366026	0.893099	0.999163	0.846976	0.956373	0.601499	0.672373	0.857871		0.318095	0.961568	0.911864	0.705267	0.58441	0.66688	0.472897	0.321625	0.734877	0.585701	0.909011			0.229268	0.69266	0.576468	0.540828	0.500875	0.750957	0.756345	0.433972	0.841311
-2.60784	0.243391	0.720463	0.950281	0.830326	0.558417	0.64	0.956404	0.706561	0.725605	0.726802	0.370476	0.892911	0.998954	0.834965	0.951441	0.600346	0.671206	0.86775		0.337019	0.946442	0.919068	0.739677	0.592636	0.687397	0.476324	0.353134	0.734877	0.6022	0.91601			0.227716	0.677424	0.594846	0.54784	0.544023	0.800669	0.75417	0.451487	0.842199
-2.56863	0.2479	0.735993	0.950713	0.819014	0.55306	0.641942	0.949905	0.726837	0.753127	0.73397	0.377756	0.891531	0.999373	0.822064	0.955234	0.596598	0.66965	0.883365		0.359132	0.936255	0.924592	0.770197	0.601645	0.707731	0.481308	0.377991	0.732617	0.612282	0.913386			0.225831	0.665957	0.616181	0.556435	0.587172	0.842735	0.753443	0.467612	0.842199
-2.52941	0.252722	0.74939	0.953307	0.803932	0.550999	0.64466	0.943677	0.747113	0.777523	0.734369	0.38908	0.89128	1	0.810498	0.96396	0.593714	0.66926	0.906628		0.381671	0.927921	0.930596	0.800419	0.608304	0.729987	0.491589	0.393862	0.731486	0.613199	0.90697			0.225721	0.658748	0.631812	0.568197	0.626239	0.883366	0.75417	0.484014	0.843971
-2.4902	0.257387	0.759135	0.954604	0.795044	0.556151	0.652039	0.939886	0.769923	0.800459	0.728395	0.40546	0.89473	0.999024	0.800712	0.980653	0.598039	0.668483	0.932122		0.405698	0.918506	0.932997	0.829742	0.612612	0.750046	0.509657	0.409266	0.732617	0.612741	0.901137			0.229823	0.650721	0.641107	0.581768	0.659184	0.912524	0.75707	0.497081	0.847519
-2.45098	0.261431	0.766139	0.953739	0.795852	0.568926	0.660971	0.941511	0.794987	0.82256	0.723217	0.426694	0.900627	0.996236	0.791815	0.991653	0.61188	0.667704	0.953155		0.427387	0.912641	0.942123	0.85787	0.617313	0.77212	0.530841	0.426187	0.738269	0.614116	0.899388			0.240466	0.646953	0.650824	0.596924	0.686589	0.929732	0.765047	0.509035	0.853723
-2.41176	0.267185	0.772228	0.953739	0.796929	0.586029	0.671068	0.950447	0.822867	0.841743	0.719633	0.451567	0.906148	0.991844	0.783363	0.998862	0.630046	0.667315	0.970045		0.447799	0.908628	0.95389	0.889288	0.622405	0.787507	0.551402	0.441008	0.743923	0.620991	0.898804			0.258093	0.645478	0.664343	0.612531	0.712828	0.936902	0.768672	0.51682	0.863476
-2.37255	0.276205	0.774361	0.954172	0.800161	0.608283	0.683496	0.96209	0.846522	0.861551	0.72282	0.481092	0.91079	0.987522	0.776691	0.999241	0.647347	0.668871	0.985978		0.471401	0.904152	0.966859	0.924596	0.627106	0.803902	0.56947	0.450928	0.749011	0.630615	0.896763			0.28082	0.648755	0.692015	0.629496	0.738776	0.934034	0.771574	0.523492	0.874114
-2.33333	0.290358	0.772228	0.95201	0.804471	0.637132	0.696311	0.969401	0.873838	0.8799	0.730386	0.51547	0.915809	0.983688	0.771797	0.992412	0.662053	0.673541	0.997132		0.496704	0.889952	0.98487	0.955117	0.629847	0.827716	0.584736	0.464582	0.755228	0.642989	0.894138			0.308315	0.654816	0.726447	0.645782	0.774636	0.930211	0.775925	0.528218	0.884753
-2.29412	0.313064	0.767357	0.948119	0.812281	0.672574	0.711457	0.965611	0.895803	0.900542	0.741139	0.55086	0.921957	0.980551	0.766905	0.981791	0.677913	0.679766	1		0.523283	0.866491	0.995437	0.97696	0.632981	0.859132	0.596885	0.482553	0.762578	0.659028	0.885389			0.341131	0.666776	0.759612	0.664555	0.811662	0.927343	0.783176	0.529052	0.895391
-2.2549	0.347123	0.760962	0.945957	0.823862	0.713373	0.727379	0.95857	0.914108	0.918265	0.74552	0.583215	0.929046	0.979156	0.760676	0.968513	0.694925	0.685602	0.99777		0.552626	0.829912	1	0.982645	0.636506	0.893296	0.603738	0.500525	0.772187	0.671402	0.875474			0.378049	0.68021	0.789607	0.684687	0.857434	0.924953	0.786076	0.527384	0.905141
-2.21569	0.390824	0.753045	0.946822	0.834096	0.757882	0.741359	0.952613	0.93016	0.930984	0.739148	0.613549	0.937704	0.978738	0.754448	0.955234	0.714821	0.688327	0.990121		0.586859	0.787313	0.996638	0.978157	0.644732	0.924803	0.604984	0.515113	0.775578	0.678736	0.871682			0.42184	0.693152	0.811364	0.708889	0.898542	0.926864	0.7839	0.528774	0.915779
-2.17647	0.440436	0.749086	0.948119	0.83679	0.803008	0.75767	0.945843	0.94931	0.933069	0.729191	0.642872	0.947993	0.979644	0.74911	0.947268	0.741638	0.688716	0.974187		0.624069	0.749498	0.988473	0.968283	0.658441	0.948434	0.606853	0.52865	0.773318	0.686985	0.8711			0.474945	0.71019	0.826574	0.733092	0.932653	0.931166	0.7781	0.532388	0.929965
-2.13725	0.492691	0.751827	0.947687	0.84083	0.845044	0.773205	0.945302	0.951562	0.931609	0.723616	0.671386	0.959599	0.98069	0.744662	0.936267	0.782584	0.687548	0.955705		0.666808	0.724186	0.98415	0.96559	0.672542	0.963547	0.61215	0.531917	0.769926	0.699359	0.869641			0.539468	0.739679	0.825095	0.755937	0.955394	0.935468	0.775925	0.549902	0.945035
-2.09804	0.550856	0.760048	0.947254	0.861837	0.877807	0.790291	0.946115	0.945649	0.934946	0.720828	0.696461	0.972647	0.981527	0.742438	0.919575	0.832757	0.685602	0.937859		0.705295	0.705973	0.985831	0.966786	0.686643	0.970049	0.622119	0.5276	0.76823	0.719982	0.865558			0.613969	0.778834	0.817702	0.778105	0.965015	0.940727	0.781	0.583542	0.959221
-2.05882	0.611198	0.775274	0.945525	0.903312	0.906038	0.808544	0.955591	0.932131	0.94829	0.72282	0.724368	0.985822	0.981596	0.741993	0.896813	0.870819	0.68716	0.92288		0.73889	0.688378	0.989674	0.966786	0.696827	0.979026	0.639564	0.525966	0.763143	0.749771	0.86585			0.689357	0.825688	0.809886	0.803212	0.966181	0.940727	0.788251	0.619961	0.968971
-2.01961	0.675272	0.797807	0.943796	0.946135	0.936122	0.821747	0.969401	0.916362	0.963928	0.726802	0.755713	0.995985	0.98069	0.743772	0.868361	0.891003	0.693774	0.913958		0.766107	0.67603	0.997358	0.964991	0.704662	0.989467	0.663551	0.526666	0.756359	0.784143	0.871682			0.752439	0.873689	0.795733	0.829677	0.95831	0.945986	0.798404	0.661384	0.977838
-1.98039	0.731416	0.83039	0.940769	0.974414	0.956934	0.833398	0.984565	0.910166	0.981234	0.734369	0.78908	1	0.978459	0.743328	0.840288	0.892157	0.702723	0.910772		0.782266	0.673715	0.996398	0.972172	0.710145	1	0.690965	0.535535	0.748444	0.818057	0.876932			0.797339	0.908585	0.792142	0.859081	0.952187	0.960326	0.806382	0.706978	0.981383
-1.94118	0.785537	0.866321	0.938175	0.983571	0.974655	0.846603	0.995126	0.910166	0.993119	0.738351	0.820223	0.996487	0.975322	0.741549	0.814492	0.890715	0.709727	0.909815		0.794174	0.677882	0.98391	0.983543	0.716412	0.995512	0.725234	0.556658	0.739965	0.848305	0.878974			0.829933	0.934633	0.806928	0.888713	0.948396	0.978968	0.811457	0.742842	0.981383
-1.90196	0.836392	0.900731	0.938175	0.972259	0.991757	0.860583	1	0.914108	1	0.74313	0.851365	0.989272	0.971767	0.742438	0.797799	0.894176	0.712451	0.899618		0.802254	0.685137	0.963017	0.998504	0.726204	0.974812	0.770093	0.594935	0.727529	0.874885	0.871391			0.854878	0.955603	0.833333	0.919701	0.947522	0.994743	0.815808	0.768418	0.978723
-1.86275	0.878072	0.928136	0.941634	0.946674	1	0.874952	0.992418	0.923965	0.996663	0.755078	0.88817	0.98212	0.968839	0.745997	0.784901	0.908593	0.711673	0.881135		0.801191	0.692082	0.920029	1	0.744222	0.939275	0.821184	0.648034	0.715658	0.894134	0.861184			0.875942	0.961992	0.859105	0.942773	0.945481	1	0.816532	0.788435	0.980497
-1.82353	0.898289	0.942448	0.947687	0.920549	0.995879	0.885049	0.974275	0.932131	0.984779	0.780565	0.924772	0.97591	0.965563	0.75	0.7739	0.926471	0.711673	0.852772		0.802892	0.695941	0.860711	0.986236	0.766549	0.903371	0.873521	0.71712	0.710006	0.906967	0.853018			0.898115	0.96576	0.879805	0.952499	0.945481	0.992352	0.819434	0.795941	0.992021
-1.78431	0.905599	0.950365	0.956333	0.911931	0.975685	0.887767	0.957216	0.950155	0.956839	0.814018	0.956926	0.969636	0.962984	0.752225	0.765554	0.940023	0.714397	0.8174		0.811397	0.693934	0.793948	0.956313	0.791618	0.868474	0.91838	0.79776	0.708875	0.913382	0.854185			0.92439	0.972641	0.89417	0.953404	0.955394	0.969885	0.825234	0.808173	0.999114
-1.7451	0.906843	0.952801	0.966278	0.921357	0.956315	0.890097	0.948822	0.969023	0.913678	0.850259	0.984429	0.963237	0.960474	0.754894	0.759864	0.942042	0.719066	0.789357		0.830534	0.687606	0.732949	0.912627	0.807286	0.831746	0.939876	0.879099	0.706614	0.919341	0.868183			0.954767	0.976736	0.908323	0.952499	0.970262	0.934513	0.835387	0.833472	1
-1.70588	0.909176	0.955846	0.975357	0.935092	0.932413	0.899806	0.940969	0.986764	0.859258	0.872162	0.999596	0.956524	0.958174	0.760676	0.754173	0.942619	0.722568	0.772785		0.862003	0.678654	0.689481	0.864154	0.823345	0.79456	0.937694	0.937449	0.706614	0.92759	0.898804			0.982483	0.98886	0.934094	0.961773	0.987464	0.895794	0.843365	0.86044	0.995566
-1.66667	0.92084	0.963154	0.983571	0.958793	0.906862	0.917282	0.939616	0.998028	0.808173	0.875747	1	0.948683	0.956152	0.767793	0.744688	0.950115	0.725291	0.7645		0.899213	0.665072	0.659222	0.822561	0.839013	0.75948	0.91028	0.971059	0.70831	0.932631	0.934675			0.997339	0.987221	0.962822	0.978285	0.999709	0.866635	0.841914	0.902696	0.993795
-1.62745	0.936081	0.972594	0.992218	0.984649	0.894498	0.944078	0.933929	1	0.76251	0.862207	0.991507	0.93852	0.954548	0.772687	0.734445	0.97549	0.727626	0.748884		0.931958	0.637752	0.639769	0.78875	0.857814	0.728522	0.876324	0.987396	0.717354	0.941339	0.970837			1	0.992791	0.984368	0.99525	1	0.849905	0.838287	0.946066	0.991136
-1.58824	0.957854	0.981424	0.998271	1	0.890171	0.968156	0.927701	0.999155	0.725396	0.852649	0.981396	0.926913	0.952388	0.774022	0.723445	0.995963	0.731128	0.726259		0.95556	0.605803	0.62464	0.776481	0.878182	0.692801	0.851402	0.991131	0.730921	0.955546	0.991542			0.996341	0.999836	0.990072	1	0.969971	0.844647	0.831036	0.981374	0.984043
-1.54902	0.975428	0.99391	1	0.996498	0.883371	0.99068	0.918765	0.993804	0.694954	0.842294	0.973306	0.914868	0.949878	0.774912	0.709788	1	0.735797	0.702039		0.968956	0.577867	0.612392	0.770197	0.898551	0.656439	0.847664	0.976893	0.746749	0.975711	1			0.986918	1	0.992395	0.990726	0.915744	0.839867	0.82451	1	0.97163
-1.5098	0.993779	1	0.995244	0.975761	0.870389	1	0.911454	0.982821	0.668057	0.845081	0.964813	0.9032	0.947508	0.778025	0.694233	0.984141	0.741245	0.683556		0.974059	0.56058	0.601104	0.769899	0.913435	0.628046	0.85514	0.947835	0.758055	0.994043	0.998542			0.965964	0.980996	0.998522	0.971726	0.853061	0.83174	0.817259	0.999166	0.955673
-1.47059	1	0.999391	0.984868	0.95987	0.852668	0.999612	0.900623	0.969304	0.639283	0.862207	0.954499	0.89197	0.945068	0.782473	0.680197	0.971165	0.743191	0.670172		0.978524	0.556567	0.587176	0.763615	0.932629	0.606979	0.868224	0.911308	0.77671	1	0.991251			0.93725	0.945281	1	0.954083	0.785714	0.815488	0.810006	0.979983	0.941489
-1.43137	0.989891	0.992083	0.977519	0.953676	0.827117	0.989127	0.879231	0.951562	0.609466	0.89765	0.936502	0.881242	0.942977	0.786922	0.667678	0.961938	0.742023	0.655194		0.97895	0.560117	0.572527	0.748653	0.951038	0.590951	0.87757	0.878749	0.799321	0.991751	0.980461			0.898337	0.897608	0.994297	0.94413	0.737609	0.797324	0.804931	0.956353	0.934396
-1.39216	0.968118	0.983252	0.973195	0.9561	0.804245	0.964661	0.842946	0.932695	0.583611	0.941458	0.915875	0.872836	0.940955	0.791815	0.656298	0.961073	0.746303	0.633843		0.979162	0.565211	0.557877	0.724118	0.970231	0.579044	0.877259	0.85716	0.818542	0.971127	0.965004			0.849335	0.849934	0.98289	0.93938	0.69621	0.780115	0.804931	0.911315	0.930851
-1.35294	0.934992	0.98112	0.968006	0.963371	0.792293	0.938642	0.807203	0.907913	0.559008	0.980087	0.890192	0.866939	0.939352	0.797599	0.647572	0.962226	0.753307	0.612811		0.986391	0.568452	0.545629	0.69629	0.975714	0.566862	0.885047	0.852258	0.829846	0.950504	0.956547			0.787361	0.814384	0.966202	0.928749	0.666764	0.760039	0.812908	0.869058	0.926418
-1.31373	0.898289	0.987819	0.961521	0.968489	0.781372	0.911068	0.78202	0.872712	0.538782	0.998805	0.865116	0.860728	0.937051	0.801602	0.639605	0.961073	0.756809	0.604525		0.994259	0.566754	0.535543	0.665469	0.978457	0.551566	0.897507	0.863578	0.836065	0.94363	0.947798			0.726386	0.789646	0.950993	0.916082	0.638193	0.746176	0.822334	0.832917	0.915779
-1.27451	0.858476	0.992387	0.959792	0.97199	0.777251	0.880777	0.766586	0.834131	0.520225	1	0.837007	0.853451	0.933287	0.803826	0.633915	0.961361	0.753697	0.606437		0.999787	0.558419	0.522815	0.64243	0.98629	0.533339	0.910592	0.887385	0.840022	0.948671	0.938174			0.677938	0.764744	0.939797	0.897535	0.609912	0.736617	0.82741	0.778148	0.902481
-1.23529	0.819751	0.994519	0.961089	0.968219	0.781578	0.852039	0.753588	0.787947	0.502085	0.988849	0.809909	0.845358	0.929034	0.80694	0.633156	0.955305	0.755641	0.615997		1	0.538355	0.513929	0.620287	0.998434	0.512731	0.929907	0.915043	0.834369	0.963337	0.910178			0.634812	0.734436	0.927334	0.880117	0.5793	0.728012	0.831761	0.720044	0.892731
-1.19608	0.776672	0.99391	0.959792	0.957178	0.787348	0.826408	0.743569	0.751337	0.483528	0.971724	0.782204	0.838896	0.925131	0.812278	0.636191	0.941176	0.768482	0.630657		0.980225	0.505634	0.506724	0.605925	1	0.491116	0.960436	0.943167	0.831542	0.962878	0.874599			0.596452	0.701671	0.911491	0.853427	0.548105	0.719408	0.840463	0.655824	0.887412
-1.15686	0.735148	0.985688	0.95763	0.939132	0.80919	0.804661	0.738966	0.715009	0.463511	0.951016	0.753893	0.834504	0.922691	0.815392	0.639605	0.911765	0.789105	0.646909		0.934297	0.468437	0.504563	0.592759	0.980807	0.469958	0.988474	0.966858	0.832673	0.951879	0.833771			0.561752	0.67464	0.894804	0.825378	0.525365	0.71654	0.852791	0.589102	0.883864
-1.11765	0.700778	0.971072	0.957198	0.927013	0.837008	0.788738	0.728405	0.692481	0.444746	0.927121	0.720526	0.829925	0.919972	0.814502	0.64226	0.88293	0.809338	0.66571		0.877525	0.431548	0.500481	0.585877	0.952605	0.447335	1	0.984246	0.844544	0.941797	0.804899			0.53592	0.648427	0.884241	0.796652	0.501458	0.716061	0.860042	0.524882	0.878545
-1.07843	0.672784	0.949147	0.952875	0.924859	0.872244	0.772427	0.709721	0.672205	0.425563	0.910394	0.680283	0.824843	0.916626	0.814057	0.644917	0.859285	0.823735	0.68037		0.821815	0.401297	0.496878	0.582585	0.916569	0.423246	0.992835	0.995682	0.866026	0.926673	0.783027			0.510421	0.62074	0.866709	0.77358	0.479592	0.716061	0.859318	0.452321	0.87234
-1.03922	0.644635	0.922959	0.945957	0.931591	0.905625	0.756117	0.685351	0.641791	0.410967	0.903226	0.637614	0.820452	0.913698	0.815836	0.646434	0.845733	0.829572	0.682282		0.777801	0.375984	0.493756	0.583483	0.8821	0.399615	0.96729	1	0.89316	0.901925	0.76932			0.479823	0.605341	0.837558	0.753676	0.452187	0.71654	0.85134	0.391993	0.863476
-1	0.618507	0.893727	0.93904	0.931053	0.917165	0.743301	0.658543	0.609405	0.403044	0.903226	0.600607	0.818068	0.910701	0.817616	0.647951	0.841407	0.826848	0.675908		0.753987	0.347276	0.493756	0.583483	0.851548	0.375252	0.93053	0.981095	0.92425	0.869386	0.751822			0.44224	0.595183	0.814111	0.739199	0.434694	0.715106	0.841189	0.34779	0.855497
-0.960784	0.593624	0.865713	0.929961	0.917317	0.906449	0.736699	0.639588	0.57336	0.396789	0.899244	0.571688	0.818319	0.907285	0.818505	0.652124	0.845733	0.824513	0.66826		0.737402	0.316252	0.491354	0.581389	0.819036	0.344019	0.877259	0.945501	0.949124	0.824474	0.729367			0.403659	0.59633	0.778411	0.727211	0.42449	0.703634	0.832487	0.319989	0.850178
-0.921569	0.563142	0.834957	0.924773	0.887692	0.885844	0.729321	0.624154	0.54886	0.390742	0.890881	0.547826	0.820138	0.902893	0.817616	0.656298	0.850346	0.824124	0.663162		0.73166	0.298348	0.48415	0.575105	0.790443	0.312054	0.827414	0.903723	0.964951	0.787352	0.705453			0.371064	0.600753	0.72349	0.720199	0.4207	0.686425	0.82451	0.300807	0.850178
-0.882353	0.529083	0.80542	0.923044	0.852141	0.865444	0.721942	0.613864	0.532244	0.385947	0.878136	0.528211	0.82202	0.898362	0.812278	0.659712	0.844003	0.82568	0.661886		0.724856	0.294799	0.472862	0.567325	0.760282	0.279081	0.778816	0.852492	0.969474	0.763062	0.684456			0.348781	0.604358	0.677017	0.719294	0.410495	0.671606	0.819434	0.286628	0.850178
-0.843137	0.5028	0.778623	0.92045	0.814974	0.859468	0.716117	0.609803	0.524922	0.380317	0.866986	0.507381	0.823024	0.893831	0.80605	0.664264	0.831603	0.824903	0.659656		0.707846	0.298966	0.461095	0.55775	0.742656	0.252519	0.740187	0.807212	0.975127	0.750688	0.673957			0.337029	0.606815	0.637516	0.718616	0.398834	0.655354	0.820159	0.276897	0.841311
-0.803922	0.483204	0.762789	0.916126	0.783194	0.869359	0.708738	0.614405	0.52267	0.375313	0.855436	0.492417	0.823024	0.88916	0.802047	0.672989	0.804498	0.824513	0.653282		0.682755	0.301127	0.449328	0.547576	0.732864	0.232918	0.71838	0.7624	0.975691	0.734647	0.664626			0.32827	0.597477	0.600338	0.717711	0.389504	0.632409	0.818708	0.267167	0.835106
-0.764706	0.463608	0.753958	0.911803	0.753299	0.884813	0.701747	0.620904	0.517037	0.372393	0.84986	0.477857	0.822208	0.884838	0.801157	0.682093	0.779989	0.82179	0.648184		0.65001	0.299583	0.436839	0.538301	0.719938	0.215607	0.716199	0.721788	0.975691	0.696609	0.664626			0.32561	0.582405	0.582172	0.717484	0.380467	0.602295	0.823785	0.259383	0.832447
-0.72549	0.445879	0.74939	0.907047	0.723943	0.893262	0.697476	0.624695	0.511687	0.371768	0.842294	0.461072	0.821581	0.880934	0.799822	0.69006	0.761246	0.816342	0.652008		0.615139	0.29449	0.424352	0.53441	0.701528	0.206448	0.723988	0.685028	0.967212	0.647571	0.662292			0.322062	0.567497	0.573722	0.725175	0.372304	0.576482	0.825234	0.255769	0.835992
-0.686275	0.427527	0.741778	0.903156	0.697011	0.886049	0.695534	0.625778	0.510279	0.37156	0.827559	0.435794	0.821393	0.87696	0.795818	0.694233	0.759804	0.813618	0.658062		0.592813	0.28739	0.416187	0.530521	0.679201	0.19848	0.72025	0.647917	0.959299	0.607242	0.664042			0.317295	0.563565	0.568441	0.738747	0.368805	0.556406	0.823059	0.253267	0.844859
-0.647059	0.413997	0.735688	0.903589	0.676003	0.861941	0.687379	0.627674	0.510279	0.370517	0.812823	0.401011	0.821016	0.874521	0.792261	0.694612	0.759516	0.816342	0.660612		0.573464	0.278438	0.414505	0.53082	0.661575	0.189778	0.725857	0.614658	0.963256	0.576994	0.662584			0.309978	0.560288	0.559569	0.74802	0.365598	0.535373	0.823059	0.248263	0.84929
-0.607843	0.402955	0.730816	0.904886	0.660921	0.811457	0.669126	0.628487	0.504084	0.366764	0.80207	0.364813	0.820703	0.872778	0.785588	0.697648	0.766148	0.816732	0.657106		0.550074	0.268869	0.418107	0.53441	0.647865	0.182543	0.733645	0.583032	0.9723	0.562328	0.669583			0.297007	0.560125	0.552387	0.754354	0.363849	0.517687	0.815084	0.242146	0.854609
-0.568627	0.395024	0.724421	0.903589	0.64907	0.764269	0.643884	0.627132	0.48775	0.363845	0.80247	0.334075	0.819824	0.871035	0.776246	0.701062	0.775087	0.814007	0.650096		0.529662	0.263621	0.42243	0.538899	0.640423	0.176772	0.729283	0.562493	0.992085	0.556829	0.677165			0.286918	0.557667	0.547106	0.760009	0.360641	0.510994	0.807106	0.239922	0.858157
-0.529412	0.392535	0.722594	0.899698	0.631026	0.72347	0.620971	0.625237	0.473951	0.360092	0.814417	0.315672	0.817315	0.869223	0.76468	0.704855	0.791522	0.809728	0.644359		0.497342	0.262849	0.42171	0.535907	0.637289	0.174849	0.7	0.562143	1	0.550871	0.682706			0.276386	0.556848	0.547106	0.762271	0.361808	0.511951	0.799129	0.23881	0.857269
-0.490196	0.393624	0.726248	0.893645	0.608942	0.690295	0.612039	0.623883	0.464658	0.359466	0.818797	0.30455	0.814617	0.86741	0.756229	0.710167	0.802768	0.80856	0.640535		0.458856	0.264856	0.420269	0.525733	0.630239	0.174666	0.64704	0.576497	0.994912	0.547662	0.682706			0.262971	0.575196	0.554288	0.762045	0.363557	0.511951	0.804206	0.237698	0.855497
-0.45098	0.389891	0.73721	0.888457	0.587395	0.660416	0.613981	0.626591	0.457054	0.362177	0.817602	0.294843	0.813739	0.865667	0.748221	0.715098	0.800461	0.807003	0.640535		0.413991	0.263467	0.411623	0.516457	0.622797	0.176406	0.593458	0.602987	0.977954	0.547662	0.678624			0.253104	0.593709	0.560203	0.754806	0.365014	0.511473	0.841189	0.23742	0.858157
-0.411765	0.380404	0.750913	0.886294	0.570159	0.641665	0.623301	0.624154	0.456209	0.370726	0.814815	0.287159	0.813425	0.863506	0.739324	0.724583	0.799596	0.805447	0.641173		0.369339	0.256212	0.403939	0.518252	0.617705	0.177322	0.546106	0.628895	0.940644	0.552704	0.68329			0.249335	0.616153	0.563371	0.74508	0.36793	0.507171	0.907903	0.237142	0.860816
-0.372549	0.365785	0.760658	0.886294	0.554	0.629301	0.632234	0.619821	0.458463	0.381776	0.815213	0.281699	0.811606	0.86267	0.728204	0.733307	0.808535	0.800778	0.637667		0.335105	0.246797	0.392411	0.527229	0.618488	0.177871	0.521495	0.649784	0.900508	0.562328	0.693205			0.25255	0.64597	0.565272	0.73083	0.374635	0.507648	0.970268	0.234084	0.862588
-0.333333	0.347901	0.754872	0.886294	0.53353	0.624562	0.641942	0.61576	0.459025	0.393036	0.812425	0.282103	0.807277	0.863925	0.714858	0.749621	0.825837	0.789883	0.631293		0.316181	0.239543	0.388568	0.538001	0.622013	0.178421	0.513084	0.634963	0.862068	0.56737	0.708953			0.255654	0.677261	0.573933	0.712508	0.384549	0.505737	1	0.231026	0.867907
-0.294118	0.333126	0.736297	0.884997	0.515755	0.621059	0.63534	0.609261	0.457899	0.395538	0.812027	0.286755	0.803011	0.865389	0.704627	0.775417	0.83564	0.783268	0.630657		0.301297	0.238772	0.389289	0.545482	0.635723	0.182726	0.511838	0.602404	0.832109	0.565995	0.718285			0.255876	0.733781	0.591255	0.701198	0.387172	0.496176	0.995649	0.228801	0.874114
-0.254902	0.321617	0.719244	0.885863	0.510907	0.604574	0.620194	0.5987	0.456209	0.397206	0.804062	0.293023	0.800627	0.86504	0.698844	0.813733	0.831892	0.785992	0.629381		0.304274	0.241395	0.396254	0.546679	0.649824	0.187488	0.515264	0.562726	0.823629	0.561411	0.731992			0.255211	0.777851	0.608788	0.694639	0.379883	0.488528	0.972443	0.228524	0.883864
-0.215686	0.323017	0.714068	0.886728	0.512793	0.579023	0.618253	0.582183	0.462405	0.390117	0.800876	0.302932	0.799435	0.861833	0.694395	0.86267	0.797578	0.794941	0.623965		0.31533	0.246334	0.403939	0.543088	0.657266	0.18529	0.525857	0.539386	0.820802	0.558662	0.74599			0.249667	0.805865	0.622729	0.701651	0.367056	0.489006	0.947788	0.228246	0.896277
-0.176471	0.331726	0.722594	0.885431	0.514678	0.542551	0.625631	0.570268	0.459307	0.389491	0.799681	0.315672	0.797553	0.858627	0.690837	0.91047	0.751153	0.796497	0.627469		0.32256	0.251119	0.412104	0.532017	0.654524	0.17952	0.534891	0.524565	0.811758	0.556371	0.757655			0.241242	0.804391	0.617237	0.712961	0.353644	0.493786	0.906454	0.227133	0.90071
-0.137255	0.33577	0.720463	0.885431	0.520603	0.50237	0.64	0.550501	0.452549	0.389282	0.797691	0.330839	0.794667	0.857442	0.689057	0.942337	0.721741	0.786381	0.644997		0.328514	0.259453	0.424592	0.508678	0.65609	0.176681	0.55296	0.511845	0.8078	0.549954	0.755906			0.241353	0.770314	0.622518	0.737842	0.347814	0.501435	0.857142	0.227133	0.883864
-0.0980392	0.349456	0.714372	0.888025	0.523027	0.462807	0.659418	0.535879	0.435652	0.399082	0.801275	0.348837	0.793978	0.857163	0.685943	0.980272	0.731834	0.768872	0.664118		0.34276	0.271184	0.450528	0.471574	0.668234	0.183184	0.56729	0.473801	0.817411	0.538955	0.752406			0.241463	0.737221	0.64512	0.753223	0.355393	0.494742	0.831036	0.227967	0.867907
-0.0588235	0.36423	0.712545	0.886294	0.523297	0.427982	0.664466	0.535067	0.42298	0.412427	0.797691	0.371891	0.795671	0.855629	0.678381	0.98217	0.772203	0.761089	0.66348		0.353817	0.287081	0.481268	0.435967	0.661183	0.195365	0.607788	0.42502	0.834934	0.529789	0.746573			0.24235	0.717071	0.657372	0.773354	0.375219	0.480402	0.817983	0.228246	0.867021
-0.0196078	0.362675	0.729902	0.878512	0.514139	0.402844	0.669126	0.5329	0.421853	0.406172	0.778575	0.388676	0.798871	0.857232	0.674377	0.999241	0.829873	0.752139	0.6587		0.368275	0.292638	0.478626	0.418611	0.652958	0.194175	0.557009	0.390711	0.832109	0.528414	0.77282			0.23969	0.701998	0.666244	0.772449	0.398251	0.459369	0.803479	0.227412	0.882093
0.0196078	0.36423	0.712545	0.886294	0.523297	0.427982	0.664466	0.535067	0.42298	0.412427	0.797691	0.371891	0.795671	0.855629	0.678381	0.98217	0.772203	0.761089	0.66348		0.353817	0.287081	0.481268	0.435967	0.661183	0.195365	0.607788	0.42502	0.834934	0.529789	0.746573			0.24235	0.717071	0.657372	0.773354	0.375219	0.480402	0.817983	0.228246	0.867021
0.0588235	0.349456	0.714372	0.888025	0.523027	0.462807	0.659418	0.535879	0.435652	0.399082	0.801275	0.348837	0.793978	0.857163	0.685943	0.980272	0.731834	0.768872	0.664118		0.34276	0.271184	0.450528	0.471574	0.668234	0.183184	0.56729	0.473801	0.817411	0.538955	0.752406			0.241463	0.737221	0.64512	0.753223	0.355393	0.494742	0.831036	0.227967	0.867907
0.0980392	0.33577	0.720463	0.885431	0.520603	0.50237	0.64	0.550501	0.452549	0.389282	0.797691	0.330839	0.794667	0.857442	0.689057	0.942337	0.721741	0.786381	0.644997		0.328514	0.259453	0.424592	0.508678	0.65609	0.176681	0.55296	0.511845	0.8078	0.549954	0.755906			0.241353	0.770314	0.622518	0.737842	0.347814	0.501435	0.857142	0.227133	0.883864
0.137255	0.331726	0.722594	0.885431	0.514678	0.542551	0.625631	0.570268	0.459307	0.389491	0.799681	0.315672	0.797553	0.858627	0.690837	0.91047	0.751153	0.796497	0.627469		0.32256	0.251119	0.412104	0.532017	0.654524	0.17952	0.534891	0.524565	0.811758	0.556371	0.757655			0.241242	0.804391	0.617237	0.712961	0.353644	0.493786	0.906454	0.227133	0.90071
0.176471	0.323017	0.714068	0.886728	0.512793	0.579023	0.618253	0.582183	0.462405	0.390117	0.800876	0.302932	0.799435	0.861833	0.694395	0.86267	0.797578	0.794941	0.623965		0.31533	0.246334	0.403939	0.543088	0.657266	0.18529	0.525857	0.539386	0.820802	0.558662	0.74599			0.249667	0.805865	0.622729	0.701651	0.367056	0.489006	0.947788	0.228246	0.896277
0.215686	0.321617	0.719244	0.885863	0.510907	0.604574	0.620194	0.5987	0.456209	0.397206	0.804062	0.293023	0.800627	0.86504	0.698844	0.813733	0.831892	0.785992	0.629381		0.304274	0.241395	0.396254	0.546679	0.649824	0.187488	0.515264	0.562726	0.823629	0.561411	0.731992			0.255211	0.777851	0.608788	0.694639	0.379883	0.488528	0.972443	0.228524	0.883864
0.254902	0.333126	0.736297	0.884997	0.515755	0.621059	0.63534	0.609261	0.457899	0.395538	0.812027	0.286755	0.803011	0.865389	0.704627	0.775417	0.83564	0.783268	0.630657		0.301297	0.238772	0.389289	0.545482	0.635723	0.182726	0.511838	0.602404	0.832109	0.565995	0.718285			0.255876	0.733781	0.591255	0.701198	0.387172	0.496176	0.995649	0.228801	0.874114
0.294118	0.347901	0.754872	0.886294	0.53353	0.624562	0.641942	0.61576	0.459025	0.393036	0.812425	0.282103	0.807277	0.863925	0.714858	0.749621	0.825837	0.789883	0.631293		0.316181	0.239543	0.388568	0.538001	0.622013	0.178421	0.513084	0.634963	0.862068	0.56737	0.708953			0.255654	0.677261	0.573933	0.712508	0.384549	0.505737	1	0.231026	0.867907
0.333333	0.365785	0.760658	0.886294	0.554	0.629301	0.632234	0.619821	0.458463	0.381776	0.815213	0.281699	0.811606	0.86267	0.728204	0.733307	0.808535	0.800778	0.637667		0.335105	0.246797	0.392411	0.527229	0.618488	0.177871	0.521495	0.649784	0.900508	0.562328	0.693205			0.25255	0.64597	0.565272	0.73083	0.374635	0.507648	0.970268	0.234084	0.862588
0.372549	0.380404	0.750913	0.886294	0.570159	0.641665	0.623301	0.624154	0.456209	0.370726	0.814815	0.287159	0.813425	0.863506	0.739324	0.724583	0.799596	0.805447	0.641173		0.369339	0.256212	0.403939	0.518252	0.617705	0.177322	0.546106	0.628895	0.940644	0.552704	0.68329			0.249335	0.616153	0.563371	0.74508	0.36793	0.507171	0.907903	0.237142	0.860816
0.411765	0.389891	0.73721	0.888457	0.587395	0.660416	0.613981	0.626591	0.457054	0.362177	0.817602	0.294843	0.813739	0.865667	0.748221	0.715098	0.800461	0.807003	0.640535		0.413991	0.263467	0.411623	0.516457	0.622797	0.176406	0.593458	0.602987	0.977954	0.547662	0.678624			0.253104	0.593709	0.560203	0.754806	0.365014	0.511473	0.841189	0.23742	0.858157
0.45098	0.393624	0.726248	0.893645	0.608942	0.690295	0.612039	0.623883	0.464658	0.359466	0.818797	0.30455	0.814617	0.86741	0.756229	0.710167	0.802768	0.80856	0.640535		0.458856	0.264856	0.420269	0.525733	0.630239	0.174666	0.64704	0.576497	0.994912	0.547662	0.682706			0.262971	0.575196	0.554288	0.762045	0.363557	0.511951	0.804206	0.237698	0.855497
0.490196	0.392535	0.722594	0.899698	0.631026	0.72347	0.620971	0.625237	0.473951	0.360092	0.814417	0.315672	0.817315	0.869223	0.76468	0.704855	0.791522	0.809728	0.644359		0.497342	0.262849	0.42171	0.535907	0.637289	0.174849	0.7	0.562143	1	0.550871	0.682706			0.276386	0.556848	0.547106	0.762271	0.361808	0.511951	0.799129	0.23881	0.857269
0.529412	0.395024	0.724421	0.903589	0.64907	0.764269	0.643884	0.627132	0.48775	0.363845	0.80247	0.334075	0.819824	0.871035	0.776246	0.701062	0.775087	0.814007	0.650096		0.529662	0.263621	0.42243	0.538899	0.640423	0.176772	0.729283	0.562493	0.992085	0.556829	0.677165			0.286918	0.557667	0.547106	0.760009	0.360641	0.510994	0.807106	0.239922	0.858157
0.568627	0.402955	0.730816	0.904886	0.660921	0.811457	0.669126	0.628487	0.504084	0.366764	0.80207	0.364813	0.820703	0.872778	0.785588	0.697648	0.766148	0.816732	0.657106		0.550074	0.268869	0.418107	0.53441	0.647865	0.182543	0.733645	0.583032	0.9723	0.562328	0.669583			0.297007	0.560125	0.552387	0.754354	0.363849	0.517687	0.815084	0.242146	0.854609
0.607843	0.413997	0.735688	0.903589	0.676003	0.861941	0.687379	0.627674	0.510279	0.370517	0.812823	0.401011	0.821016	0.874521	0.792261	0.694612	0.759516	0.816342	0.660612		0.573464	0.278438	0.414505	0.53082	0.661575	0.189778	0.725857	0.614658	0.963256	0.576994	0.662584			0.309978	0.560288	0.559569	0.74802	0.365598	0.535373	0.823059	0.248263	0.84929
0.647059	0.427527	0.741778	0.903156	0.697011	0.886049	0.695534	0.625778	0.510279	0.37156	0.827559	0.435794	0.821393	0.87696	0.795818	0.694233	0.759804	0.813618	0.658062		0.592813	0.28739	0.416187	0.530521	0.679201	0.19848	0.72025	0.647917	0.959299	0.607242	0.664042			0.317295	0.563565	0.568441	0.738747	0.368805	0.556406	0.823059	0.253267	0.844859
0.686275	0.445879	0.74939	0.907047	0.723943	0.893262	0.697476	0.624695	0.511687	0.371768	0.842294	0.461072	0.821581	0.880934	0.799822	0.69006	0.761246	0.816342	0.652008		0.615139	0.29449	0.424352	0.53441	0.701528	0.206448	0.723988	0.685028	0.967212	0.647571	0.662292			0.322062	0.567497	0.573722	0.725175	0.372304	0.576482	0.825234	0.255769	0.835992
0.72549	0.463608	0.753958	0.911803	0.753299	0.884813	0.701747	0.620904	0.517037	0.372393	0.84986	0.477857	0.822208	0.884838	0.801157	0.682093	0.779989	0.82179	0.648184		0.65001	0.299583	0.436839	0.538301	0.719938	0.215607	0.716199	0.721788	0.975691	0.696609	0.664626			0.32561	0.582405	0.582172	0.717484	0.380467	0.602295	0.823785	0.259383	0.832447
0.764706	0.483204	0.762789	0.916126	0.783194	0.869359	0.708738	0.614405	0.52267	0.375313	0.855436	0.492417	0.823024	0.88916	0.802047	0.672989	0.804498	0.824513	0.653282		0.682755	0.301127	0.449328	0.547576	0.732864	0.232918	0.71838	0.7624	0.975691	0.734647	0.664626			0.32827	0.597477	0.600338	0.717711	0.389504	0.632409	0.818708	0.267167	0.835106
0.803922	0.5028	0.778623	0.92045	0.814974	0.859468	0.716117	0.609803	0.524922	0.380317	0.866986	0.507381	0.823024	0.893831	0.80605	0.664264	0.831603	0.824903	0.659656		0.707846	0.298966	0.461095	0.55775	0.742656	0.252519	0.740187	0.807212	0.975127	0.750688	0.673957			0.337029	0.606815	0.637516	0.718616	0.398834	0.655354	0.820159	0.276897	0.841311
0.843137	0.529083	0.80542	0.923044	0.852141	0.865444	0.721942	0.613864	0.532244	0.385947	0.878136	0.528211	0.82202	0.898362	0.812278	0.659712	0.844003	0.82568	0.661886		0.724856	0.294799	0.472862	0.567325	0.760282	0.279081	0.778816	0.852492	0.969474	0.763062	0.684456			0.348781	0.604358	0.677017	0.719294	0.410495	0.671606	0.819434	0.286628	0.850178
0.882353	0.563142	0.834957	0.924773	0.887692	0.885844	0.729321	0.624154	0.54886	0.390742	0.890881	0.547826	0.820138	0.902893	0.817616	0.656298	0.850346	0.824124	0.663162		0.73166	0.298348	0.48415	0.575105	0.790443	0.312054	0.827414	0.903723	0.964951	0.787352	0.705453			0.371064	0.600753	0.72349	0.720199	0.4207	0.686425	0.82451	0.300807	0.850178
0.921569	0.593624	0.865713	0.929961	0.917317	0.906449	0.736699	0.639588	0.57336	0.396789	0.899244	0.571688	0.818319	0.907285	0.818505	0.652124	0.845733	0.824513	0.66826		0.737402	0.316252	0.491354	0.581389	0.819036	0.344019	0.877259	0.945501	0.949124	0.824474	0.729367			0.403659	0.59633	0.778411	0.727211	0.42449	0.703634	0.832487	0.319989	0.850178
0.960784	0.618507	0.893727	0.93904	0.931053	0.917165	0.743301	0.658543	0.609405	0.403044	0.903226	0.600607	0.818068	0.910701	0.817616	0.647951	0.841407	0.826848	0.675908		0.753987	0.347276	0.493756	0.583483	0.851548	0.375252	0.93053	0.981095	0.92425	0.869386	0.751822			0.44224	0.595183	0.814111	0.739199	0.434694	0.715106	0.841189	0.34779	0.855497
1	0.644635	0.922959	0.945957	0.931591	0.905625	0.756117	0.685351	0.641791	0.410967	0.903226	0.637614	0.820452	0.913698	0.815836	0.646434	0.845733	0.829572	0.682282		0.777801	0.375984	0.493756	0.583483	0.8821	0.399615	0.96729	1	0.89316	0.901925	0.76932			0.479823	0.605341	0.837558	0.753676	0.452187	0.71654	0.85134	0.391993	0.863476
1.03922	0.672784	0.949147	0.952875	0.924859	0.872244	0.772427	0.709721	0.672205	0.425563	0.910394	0.680283	0.824843	0.916626	0.814057	0.644917	0.859285	0.823735	0.68037		0.821815	0.401297	0.496878	0.582585	0.916569	0.423246	0.992835	0.995682	0.866026	0.926673	0.783027			0.510421	0.62074	0.866709	0.77358	0.479592	0.716061	0.859318	0.452321	0.87234
1.07843	0.700778	0.971072	0.957198	0.927013	0.837008	0.788738	0.728405	0.692481	0.444746	0.927121	0.720526	0.829925	0.919972	0.814502	0.64226	0.88293	0.809338	0.66571		0.877525	0.431548	0.500481	0.585877	0.952605	0.447335	1	0.984246	0.844544	0.941797	0.804899			0.53592	0.648427	0.884241	0.796652	0.501458	0.716061	0.860042	0.524882	0.878545
1.11765	0.735148	0.985688	0.95763	0.939132	0.80919	0.804661	0.738966	0.715009	0.463511	0.951016	0.753893	0.834504	0.922691	0.815392	0.639605	0.911765	0.789105	0.646909		0.934297	0.468437	0.504563	0.592759	0.980807	0.469958	0.988474	0.966858	0.832673	0.951879	0.833771			0.561752	0.67464	0.894804	0.825378	0.525365	0.71654	0.852791	0.589102	0.883864
1.15686	0.776672	0.99391	0.959792	0.957178	0.787348	0.826408	0.743569	0.751337	0.483528	0.971724	0.782204	0.838896	0.925131	0.812278	0.636191	0.941176	0.768482	0.630657		0.980225	0.505634	0.506724	0.605925	1	0.491116	0.960436	0.943167	0.831542	0.962878	0.874599			0.596452	0.701671	0.911491	0.853427	0.548105	0.719408	0.840463	0.655824	0.887412
1.19608	0.819751	0.994519	0.961089	0.968219	0.781578	0.852039	0.753588	0.787947	0.502085	0.988849	0.809909	0.845358	0.929034	0.80694	0.633156	0.955305	0.755641	0.615997		1	0.538355	0.513929	0.620287	0.998434	0.512731	0.929907	0.915043	0.834369	0.963337	0.910178			0.634812	0.734436	0.927334	0.880117	0.5793	0.728012	0.831761	0.720044	0.892731
1.23529	0.858476	0.992387	0.959792	0.97199	0.777251	0.880777	0.766586	0.834131	0.520225	1	0.837007	0.853451	0.933287	0.803826	0.633915	0.961361	0.753697	0.606437		0.999787	0.558419	0.522815	0.64243	0.98629	0.533339	0.910592	0.887385	0.840022	0.948671	0.938174			0.677938	0.764744	0.939797	0.897535	0.609912	0.736617	0.82741	0.778148	0.902481
1.27451	0.898289	0.987819	0.961521	0.968489	0.781372	0.911068	0.78202	0.872712	0.538782	0.998805	0.865116	0.860728	0.937051	0.801602	0.639605	0.961073	0.756809	0.604525		0.994259	0.566754	0.535543	0.665469	0.978457	0.551566	0.897507	0.863578	0.836065	0.94363	0.947798			0.726386	0.789646	0.950993	0.916082	0.638193	0.746176	0.822334	0.832917	0.915779
1.31373	0.934992	0.98112	0.968006	0.963371	0.792293	0.938642	0.807203	0.907913	0.559008	0.980087	0.890192	0.866939	0.939352	0.797599	0.647572	0.962226	0.753307	0.612811		0.986391	0.568452	0.545629	0.69629	0.975714	0.566862	0.885047	0.852258	0.829846	0.950504	0.956547			0.787361	0.814384	0.966202	0.928749	0.666764	0.760039	0.812908	0.869058	0.926418
1.35294	0.968118	0.983252	0.973195	0.9561	0.804245	0.964661	0.842946	0.932695	0.583611	0.941458	0.915875	0.872836	0.940955	0.791815	0.656298	0.961073	0.746303	0.633843		0.979162	0.565211	0.557877	0.724118	0.970231	0.579044	0.877259	0.85716	0.818542	0.971127	0.965004			0.849335	0.849934	0.98289	0.93938	0.69621	0.780115	0.804931	0.911315	0.930851
1.39216	0.989891	0.992083	0.977519	0.953676	0.827117	0.989127	0.879231	0.951562	0.609466	0.89765	0.936502	0.881242	0.942977	0.786922	0.667678	0.961938	0.742023	0.655194		0.97895	0.560117	0.572527	0.748653	0.951038	0.590951	0.87757	0.878749	0.799321	0.991751	0.980461			0.898337	0.897608	0.994297	0.94413	0.737609	0.797324	0.804931	0.956353	0.934396
1.43137	1	0.999391	0.984868	0.95987	0.852668	0.999612	0.900623	0.969304	0.639283	0.862207	0.954499	0.89197	0.945068	0.782473	0.680197	0.971165	0.743191	0.670172		0.978524	0.556567	0.587176	0.763615	0.932629	0.606979	0.868224	0.911308	0.77671	1	0.991251			0.93725	0.945281	1	0.954083	0.785714	0.815488	0.810006	0.979983	0.941489
1.47059	0.993779	1	0.995244	0.975761	0.870389	1	0.911454	0.982821	0.668057	0.845081	0.964813	0.9032	0.947508	0.778025	0.694233	0.984141	0.741245	0.683556		0.974059	0.56058	0.601104	0.769899	0.913435	0.628046	0.85514	0.947835	0.758055	0.994043	0.998542			0.965964	0.980996	0.998522	0.971726	0.853061	0.83174	0.817259	0.999166	0.955673
1.5098	0.975428	0.99391	1	0.996498	0.883371	0.99068	0.918765	0.993804	0.694954	0.842294	0.973306	0.914868	0.949878	0.774912	0.709788	1	0.735797	0.702039		0.968956	0.577867	0.612392	0.770197	0.898551	0.656439	0.847664	0.976893	0.746749	0.975711	1			0.986918	1	0.992395	0.990726	0.915744	0.839867	0.82451	1	0.97163
1.54902	0.957854	0.981424	0.998271	1	0.890171	0.968156	0.927701	0.999155	0.725396	0.852649	0.981396	0.926913	0.952388	0.774022	0.723445	0.995963	0.731128	0.726259		0.95556	0.605803	0.62464	0.776481	0.878182	0.692801	0.851402	0.991131	0.730921	0.955546	0.991542			0.996341	0.999836	0.990072	1	0.969971	0.844647	0.831036	0.981374	0.984043
1.58824	0.936081	0.972594	0.992218	0.984649	0.894498	0.944078	0.933929	1	0.76251	0.862207	0.991507	0.93852	0.954548	0.772687	0.734445	0.97549	0.727626	0.748884		0.931958	0.637752	0.639769	0.78875	0.857814	0.728522	0.876324	0.987396	0.717354	0.941339	0.970837			1	0.992791	0.984368	0.99525	1	0.849905	0.838287	0.946066	0.991136
1.62745	0.92084	0.963154	0.983571	0.958793	0.906862	0.917282	0.939616	0.998028	0.808173	0.875747	1	0.948683	0.956152	0.767793	0.744688	0.950115	0.725291	0.7645		0.899213	0.665072	0.659222	0.822561	0.839013	0.75948	0.91028	0.971059	0.70831	0.932631	0.934675			0.997339	0.987221	0.962822	0.978285	0.999709	0.866635	0.841914	0.902696	0.993795
1.66667	0.909176	0.955846	0.975357	0.935092	0.932413	0.899806	0.940969	0.986764	0.859258	0.872162	0.999596	0.956524	0.958174	0.760676	0.754173	0.942619	0.722568	0.772785		0.862003	0.678654	0.689481	0.864154	0.823345	0.79456	0.937694	0.937449	0.706614	0.92759	0.898804			0.982483	0.98886	0.934094	0.961773	0.987464	0.895794	0.843365	0.86044	0.995566
1.70588	0.906843	0.952801	0.966278	0.921357	0.956315	0.890097	0.948822	0.969023	0.913678	0.850259	0.984429	0.963237	0.960474	0.754894	0.759864	0.942042	0.719066	0.789357		0.830534	0.687606	0.732949	0.912627	0.807286	0.831746	0.939876	0.879099	0.706614	0.919341	0.868183			0.954767	0.976736	0.908323	0.952499	0.970262	0.934513	0.835387	0.833472	1
1.7451	0.905599	0.950365	0.956333	0.911931	0.975685	0.887767	0.957216	0.950155	0.956839	0.814018	0.956926	0.969636	0.962984	0.752225	0.765554	0.940023	0.714397	0.8174		0.811397	0.693934	0.793948	0.956313	0.791618	0.868474	0.91838	0.79776	0.708875	0.913382	0.854185			0.92439	0.972641	0.89417	0.953404	0.955394	0.969885	0.825234	0.808173	0.999114
1.78431	0.898289	0.942448	0.947687	0.920549	0.995879	0.885049	0.974275	0.932131	0.984779	0.780565	0.924772	0.97591	0.965563	0.75	0.7739	0.926471	0.711673	0.852772		0.802892	0.695941	0.860711	0.986236	0.766549	0.903371	0.873521	0.71712	0.710006	0.906967	0.853018			0.898115	0.96576	0.879805	0.952499	0.945481	0.992352	0.819434	0.795941	0.992021
1.82353	0.878072	0.928136	0.941634	0.946674	1	0.874952	0.992418	0.923965	0.996663	0.755078	0.88817	0.98212	0.968839	0.745997	0.784901	0.908593	0.711673	0.881135		0.801191	0.692082	0.920029	1	0.744222	0.939275	0.821184	0.648034	0.715658	0.894134	0.861184			0.875942	0.961992	0.859105	0.942773	0.945481	1	0.816532	0.788435	0.980497
1.86275	0.836392	0.900731	0.938175	0.972259	0.991757	0.860583	1	0.914108	1	0.74313	0.851365	0.989272	0.971767	0.742438	0.797799	0.894176	0.712451	0.899618		0.802254	0.685137	0.963017	0.998504	0.726204	0.974812	0.770093	0.594935	0.727529	0.874885	0.871391			0.854878	0.955603	0.833333	0.919701	0.947522	0.994743	0.815808	0.768418	0.978723
1.90196	0.785537	0.866321	0.938175	0.983571	0.974655	0.846603	0.995126	0.910166	0.993119	0.738351	0.820223	0.996487	0.975322	0.741549	0.814492	0.890715	0.709727	0.909815		0.794174	0.677882	0.98391	0.983543	0.716412	0.995512	0.725234	0.556658	0.739965	0.848305	0.878974			0.829933	0.934633	0.806928	0.888713	0.948396	0.978968	0.811457	0.742842	0.981383
1.94118	0.731416	0.83039	0.940769	0.974414	0.956934	0.833398	0.984565	0.910166	0.981234	0.734369	0.78908	1	0.978459	0.743328	0.840288	0.892157	0.702723	0.910772		0.782266	0.673715	0.996398	0.972172	0.710145	1	0.690965	0.535535	0.748444	0.818057	0.876932			0.797339	0.908585	0.792142	0.859081	0.952187	0.960326	0.806382	0.706978	0.981383
1.98039	0.675272	0.797807	0.943796	0.946135	0.936122	0.821747	0.969401	0.916362	0.963928	0.726802	0.755713	0.995985	0.98069	0.743772	0.868361	0.891003	0.693774	0.913958		0.766107	0.67603	0.997358	0.964991	0.704662	0.989467	0.663551	0.526666	0.756359	0.784143	0.871682			0.752439	0.873689	0.795733	0.829677	0.95831	0.945986	0.798404	0.661384	0.977838
2.01961	0.611198	0.775274	0.945525	0.903312	0.906038	0.808544	0.955591	0.932131	0.94829	0.72282	0.724368	0.985822	0.981596	0.741993	0.896813	0.870819	0.68716	0.92288		0.73889	0.688378	0.989674	0.966786	0.696827	0.979026	0.639564	0.525966	0.763143	0.749771	0.86585			0.689357	0.825688	0.809886	0.803212	0.966181	0.940727	0.788251	0.619961	0.968971
2.05882	0.550856	0.760048	0.947254	0.861837	0.877807	0.790291	0.946115	0.945649	0.934946	0.720828	0.696461	0.972647	0.981527	0.742438	0.919575	0.832757	0.685602	0.937859		0.705295	0.705973	0.985831	0.966786	0.686643	0.970049	0.622119	0.5276	0.76823	0.719982	0.865558			0.613969	0.778834	0.817702	0.778105	0.965015	0.940727	0.781	0.583542	0.959221
2.09804	0.492691	0.751827	0.947687	0.84083	0.845044	0.773205	0.945302	0.951562	0.931609	0.723616	0.671386	0.959599	0.98069	0.744662	0.936267	0.782584	0.687548	0.955705		0.666808	0.724186	0.98415	0.96559	0.672542	0.963547	0.61215	0.531917	0.769926	0.699359	0.869641			0.539468	0.739679	0.825095	0.755937	0.955394	0.935468	0.775925	0.549902	0.945035
2.13725	0.440436	0.749086	0.948119	0.83679	0.803008	0.75767	0.945843	0.94931	0.933069	0.729191	0.642872	0.947993	0.979644	0.74911	0.947268	0.741638	0.688716	0.974187		0.624069	0.749498	0.988473	0.968283	0.658441	0.948434	0.606853	0.52865	0.773318	0.686985	0.8711			0.474945	0.71019	0.826574	0.733092	0.932653	0.931166	0.7781	0.532388	0.929965
2.17647	0.390824	0.753045	0.946822	0.834096	0.757882	0.741359	0.952613	0.93016	0.930984	0.739148	0.613549	0.937704	0.978738	0.754448	0.955234	0.714821	0.688327	0.990121		0.586859	0.787313	0.996638	0.978157	0.644732	0.924803	0.604984	0.515113	0.775578	0.678736	0.871682			0.42184	0.693152	0.811364	0.708889	0.898542	0.926864	0.7839	0.528774	0.915779
2.21569	0.347123	0.760962	0.945957	0.823862	0.713373	0.727379	0.95857	0.914108	0.918265	0.74552	0.583215	0.929046	0.979156	0.760676	0.968513	0.694925	0.685602	0.99777		0.552626	0.829912	1	0.982645	0.636506	0.893296	0.603738	0.500525	0.772187	0.671402	0.875474			0.378049	0.68021	0.789607	0.684687	0.857434	0.924953	0.786076	0.527384	0.905141
2.2549	0.313064	0.767357	0.948119	0.812281	0.672574	0.711457	0.965611	0.895803	0.900542	0.741139	0.55086	0.921957	0.980551	0.766905	0.981791	0.677913	0.679766	1		0.523283	0.866491	0.995437	0.97696	0.632981	0.859132	0.596885	0.482553	0.762578	0.659028	0.885389			0.341131	0.666776	0.759612	0.664555	0.811662	0.927343	0.783176	0.529052	0.895391
2.29412	0.290358	0.772228	0.95201	0.804471	0.637132	0.696311	0.969401	0.873838	0.8799	0.730386	0.51547	0.915809	0.983688	0.771797	0.992412	0.662053	0.673541	0.997132		0.496704	0.889952	0.98487	0.955117	0.629847	0.827716	0.584736	0.464582	0.755228	0.642989	0.894138			0.308315	0.654816	0.726447	0.645782	0.774636	0.930211	0.775925	0.528218	0.884753
2.33333	0.276205	0.774361	0.954172	0.800161	0.608283	0.683496	0.96209	0.846522	0.861551	0.72282	0.481092	0.91079	0.987522	0.776691	0.999241	0.647347	0.668871	0.985978		0.471401	0.904152	0.966859	0.924596	0.627106	0.803902	0.56947	0.450928	0.749011	0.630615	0.896763			0.28082	0.648755	0.692015	0.629496	0.738776	0.934034	0.771574	0.523492	0.874114
2.37255	0.267185	0.772228	0.953739	0.796929	0.586029	0.671068	0.950447	0.822867	0.841743	0.719633	0.451567	0.906148	0.991844	0.783363	0.998862	0.630046	0.667315	0.970045		0.447799	0.908628	0.95389	0.889288	0.622405	0.787507	0.551402	0.441008	0.743923	0.620991	0.898804			0.258093	0.645478	0.664343	0.612531	0.712828	0.936902	0.768672	0.51682	0.863476
2.41176	0.261431	0.766139	0.953739	0.795852	0.568926	0.660971	0.941511	0.794987	0.82256	0.723217	0.426694	0.900627	0.996236	0.791815	0.991653	0.61188	0.667704	0.953155		0.427387	0.912641	0.942123	0.85787	0.617313	0.77212	0.530841	0.426187	0.738269	0.614116	0.899388			0.240466	0.646953	0.650824	0.596924	0.686589	0.929732	0.765047	0.509035	0.853723
2.45098	0.257387	0.759135	0.954604	0.795044	0.556151	0.652039	0.939886	0.769923	0.800459	0.728395	0.40546	0.89473	0.999024	0.800712	0.980653	0.598039	0.668483	0.932122		0.405698	0.918506	0.932997	0.829742	0.612612	0.750046	0.509657	0.409266	0.732617	0.612741	0.901137			0.229823	0.650721	0.641107	0.581768	0.659184	0.912524	0.75707	0.497081	0.847519
2.4902	0.252722	0.74939	0.953307	0.803932	0.550999	0.64466	0.943677	0.747113	0.777523	0.734369	0.38908	0.89128	1	0.810498	0.96396	0.593714	0.66926	0.906628		0.381671	0.927921	0.930596	0.800419	0.608304	0.729987	0.491589	0.393862	0.731486	0.613199	0.90697			0.225721	0.658748	0.631812	0.568197	0.626239	0.883366	0.75417	0.484014	0.843971
2.52941	0.2479	0.735993	0.950713	0.819014	0.55306	0.641942	0.949905	0.726837	0.753127	0.73397	0.377756	0.891531	0.999373	0.822064	0.955234	0.596598	0.66965	0.883365		0.359132	0.936255	0.924592	0.770197	0.601645	0.707731	0.481308	0.377991	0.732617	0.612282	0.913386			0.225831	0.665957	0.616181	0.556435	0.587172	0.842735	0.753443	0.467612	0.842199
2.56863	0.243391	0.720463	0.950281	0.830326	0.558417	0.64	0.956404	0.706561	0.725605	0.726802	0.370476	0.892911	0.998954	0.834965	0.951441	0.600346	0.671206	0.86775		0.337019	0.946442	0.919068	0.739677	0.592636	0.687397	0.476324	0.353134	0.734877	0.6022	0.91601			0.227716	0.677424	0.594846	0.54784	0.544023	0.800669	0.75417	0.451487	0.842199
2.60784	0.240435	0.707064	0.952442	0.843792	0.561302	0.638447	0.96182	0.684595	0.694954	0.715651	0.366026	0.893099	0.999163	0.846976	0.956373	0.601499	0.672373	0.857871		0.318095	0.961568	0.911864	0.705267	0.58441	0.66688	0.472897	0.321625	0.734877	0.585701	0.909011			0.229268	0.69266	0.576468	0.540828	0.500875	0.750957	0.756345	0.433972	0.841311
2.64706	0.23888	0.696406	0.953739	0.86049	0.553678	0.638447	0.964257	0.658688	0.664721	0.706093	0.363599	0.89059	0.998745	0.858541	0.966236	0.601499	0.674319	0.849586		0.301084	0.978392	0.90658	0.672651	0.576968	0.64151	0.469782	0.290466	0.71905	0.568286	0.897638			0.230155	0.705603	0.564428	0.535852	0.459767	0.698853	0.751268	0.420907	0.840426
2.68627	0.238725	0.688185	0.951578	0.878534	0.52586	0.640389	0.962903	0.629963	0.636572	0.700916	0.361779	0.886387	0.998675	0.871886	0.978755	0.600923	0.675097	0.839388		0.287901	0.993209	0.902257	0.650808	0.570702	0.612109	0.466979	0.261291	0.699264	0.552246	0.885098			0.229823	0.71789	0.554922	0.533137	0.423615	0.652964	0.745468	0.413122	0.841311
2.72549	0.238414	0.683009	0.945957	0.891732	0.500309	0.64	0.961549	0.600676	0.610091	0.698527	0.361577	0.881305	0.998257	0.884342	0.992412	0.598328	0.677431	0.828872		0.279396	1	0.898175	0.637044	0.566001	0.580601	0.461682	0.236784	0.663651	0.539872	0.87285			0.227384	0.7269	0.547951	0.531102	0.392711	0.616635	0.73459	0.409786	0.844859
2.76471	0.237169	0.681182	0.93904	0.901697	0.480734	0.636505	0.963444	0.575894	0.586322	0.695738	0.363195	0.876098	0.997978	0.895019	1	0.595156	0.679377	0.820905		0.273655	0.993363	0.892891	0.631059	0.562476	0.555047	0.454517	0.216711	0.631429	0.527498	0.858851			0.223281	0.734928	0.538657	0.529066	0.369096	0.587477	0.722986	0.407284	0.84929
2.80392	0.235926	0.682704	0.932123	0.906005	0.461776	0.630292	0.966152	0.558715	0.567973	0.693349	0.365419	0.871079	0.996236	0.90258	0.995827	0.59083	0.678988	0.816444		0.270678	0.980244	0.889289	0.625075	0.560517	0.535354	0.448598	0.203641	0.603731	0.516499	0.845144			0.218625	0.7346	0.526405	0.52703	0.353062	0.569789	0.712836	0.401724	0.854609
2.84314	0.235459	0.687576	0.927799	0.897926	0.440346	0.622913	0.965611	0.550267	0.553169	0.692154	0.366026	0.865747	0.994284	0.906584	0.979893	0.588812	0.676654	0.811026		0.268764	0.961414	0.884966	0.611909	0.558951	0.522074	0.443614	0.195122	0.590164	0.505041	0.832896			0.213969	0.724443	0.515209	0.525446	0.343441	0.561664	0.704134	0.394218	0.860816
2.88235	0.235303	0.695493	0.923476	0.881766	0.410262	0.614758	0.959653	0.548577	0.543161	0.690959	0.363599	0.860602	0.991635	0.911033	0.956753	0.5891	0.673541	0.797641		0.266851	0.941812	0.878002	0.588869	0.555817	0.511907	0.439564	0.188937	0.582815	0.497709	0.822689			0.2102	0.699214	0.507816	0.523185	0.339359	0.56023	0.699783	0.385321	0.865247
2.92157	0.234992	0.705542	0.917856	0.864799	0.384298	0.608933	0.953696	0.549704	0.535029	0.689367	0.357533	0.85665	0.988289	0.917705	0.934749	0.589388	0.670427	0.770236		0.264512	0.915728	0.85855	0.560144	0.550725	0.50577	0.438318	0.185553	0.574336	0.492209	0.804899			0.207095	0.653342	0.493663	0.52047	0.336735	0.562619	0.696881	0.376981	0.867021
2.96078	0.234526	0.721071	0.912668	0.850794	0.345147	0.605048	0.946927	0.548577	0.52794	0.685385	0.347826	0.853827	0.984664	0.927492	0.917678	0.589965	0.66965	0.731358		0.261961	0.880846	0.82757	0.533513	0.546025	0.5	0.438007	0.181818	0.569248	0.483502	0.777778			0.204989	0.61517	0.472328	0.517303	0.332945	0.565487	0.695432	0.369197	0.870566
3	0.234215	0.73782	0.909209	0.838944	0.319184	0.60233	0.939616	0.543791	0.521267	0.678614	0.33731	0.851506	0.981317	0.941281	0.907815	0.592272	0.670817	0.693754		0.260047	0.838246	0.79659	0.515859	0.54485	0.493589	0.438941	0.174816	0.57264	0.470669	0.752115			0.20388	0.579128	0.444444	0.516173	0.325948	0.5674	0.694705	0.360578	0.875
3.03922	0.234681	0.74665	0.907047	0.832211	0.296724	0.598447	0.932575	0.536468	0.513345	0.672243	0.328008	0.84931	0.976786	0.957295	0.904021	0.595156	0.673541	0.664754		0.258346	0.790863	0.777378	0.506882	0.545632	0.483056	0.439876	0.165597	0.569813	0.457379	0.71741			0.202993	0.550131	0.412336	0.514816	0.317784	0.568355	0.693256	0.355852	0.878545
3.07843	0.235926	0.744214	0.904021	0.837328	0.272615	0.591845	0.924722	0.529991	0.50417	0.668259	0.318099	0.847742	0.971488	0.974644	0.901365	0.595444	0.677043	0.642447		0.25707	0.740238	0.771614	0.504189	0.546416	0.46776	0.441433	0.155911	0.570944	0.44363	0.674249			0.201663	0.521133	0.381496	0.514137	0.309038	0.569789	0.691805	0.353906	0.882093
3.11765	0.237325	0.735383	0.90013	0.845677	0.248918	0.58369	0.913891	0.523232	0.493328	0.664675	0.308797	0.847365	0.965772	0.992883	0.895296	0.590253	0.684825	0.626513		0.255369	0.687606	0.778579	0.50389	0.546416	0.454296	0.442991	0.145408	0.55455	0.431714	0.631671			0.199335	0.502293	0.358682	0.512327	0.301458	0.570268	0.691081	0.352794	0.886524
3.15686	0.238725	0.723203	0.897104	0.852949	0.227076	0.576311	0.903872	0.515629	0.482902	0.66149	0.303337	0.847867	0.95894	1	0.885432	0.581603	0.69572	0.618865		0.254093	0.635746	0.78146	0.503591	0.547591	0.443305	0.441745	0.133504	0.526285	0.421173	0.589968			0.195787	0.480832	0.340515	0.510518	0.293878	0.568834	0.687454	0.349736	0.897162
3.19608	0.239036	0.710414	0.895374	0.858874	0.208943	0.570097	0.895749	0.511687	0.472894	0.64994	0.298483	0.84862	0.952457	0.991548	0.874051	0.571511	0.705837	0.620141		0.252817	0.589906	0.778098	0.503591	0.5472	0.434695	0.439564	0.124402	0.496891	0.412008	0.551181			0.192239	0.453473	0.326785	0.507577	0.286881	0.56501	0.680928	0.346122	0.911348
3.23529	0.239036	0.69732	0.891482	0.865069	0.192046	0.563496	0.889791	0.51225	0.464345	0.619275	0.293428	0.849686	0.943534	0.967972	0.860773	0.561996	0.713618	0.623327		0.252179	0.550548	0.760567	0.504189	0.544066	0.425169	0.436449	0.1174	0.468626	0.401009	0.516477			0.188138	0.415793	0.316223	0.503506	0.281341	0.56023	0.668599	0.342229	0.929965
3.27451	0.238258	0.683009	0.884134	0.871532	0.177622	0.554175	0.885459	0.515348	0.456005	0.57268	0.286755	0.849247	0.933426	0.935943	0.844461	0.548443	0.71751	0.623327		0.252179	0.521531	0.735831	0.504488	0.53819	0.413354	0.433645	0.111915	0.425664	0.389093	0.484689			0.183038	0.380734	0.307351	0.499887	0.277843	0.555449	0.655546	0.338338	0.940604
3.31373	0.237169	0.665652	0.874189	0.877996	0.161756	0.543301	0.880314	0.51929	0.448916	0.518121	0.278463	0.845232	0.922273	0.907474	0.829287	0.538062	0.720622	0.619503		0.252605	0.503473	0.706292	0.502693	0.531924	0.400165	0.429907	0.107014	0.370265	0.379011	0.452318			0.177383	0.341088	0.298902	0.497173	0.276094	0.552104	0.644669	0.335279	0.943263
3.35294	0.236081	0.639464	0.860787	0.883652	0.148362	0.528932	0.874086	0.524077	0.443494	0.480287	0.270576	0.829988	0.901499	0.882118	0.818285	0.529989	0.726848	0.614085		0.252605	0.491125	0.673391	0.499401	0.524873	0.382396	0.428037	0.102346	0.314868	0.368927	0.420239			0.172838	0.309305	0.29003	0.495589	0.276385	0.550192	0.638869	0.329719	0.939715
3.39216	0.234059	0.608404	0.84479	0.883382	0.137235	0.514952	0.860547	0.526894	0.438699	0.444047	0.263903	0.804831	0.867201	0.857206	0.811077	0.525952	0.736964	0.608031		0.252392	0.486186	0.642651	0.495213	0.516647	0.367192	0.427414	0.0973276	0.27134	0.359303	0.389618			0.169512	0.282438	0.282003	0.494232	0.277843	0.550192	0.633791	0.321379	0.937056
3.43137	0.231882	0.570036	0.8262	0.880958	0.12858	0.500971	0.841863	0.527175	0.432235	0.406213	0.257028	0.776035	0.830951	0.838523	0.804628	0.523644	0.756031	0.599745		0.252817	0.486649	0.618396	0.491622	0.507638	0.356384	0.428349	0.0925428	0.239118	0.348763	0.356955			0.167184	0.268185	0.274609	0.493101	0.280175	0.549713	0.630167	0.310536	0.937944
3.47059	0.229394	0.524665	0.80415	0.870725	0.120544	0.487378	0.826158	0.526049	0.424521	0.373955	0.249747	0.74128	0.799024	0.823843	0.797799	0.521338	0.782879	0.592416		0.253455	0.490199	0.606148	0.489228	0.497062	0.343928	0.431776	0.0878749	0.214245	0.337305	0.326043			0.165189	0.258191	0.267638	0.491291	0.281633	0.549235	0.628716	0.299694	0.941489
3.5098	0.22675	0.47838	0.779075	0.849717	0.113126	0.474175	0.807203	0.524359	0.416805	0.344883	0.242467	0.701882	0.767236	0.811388	0.793626	0.515859	0.81284	0.587954		0.25388	0.492514	0.611432	0.489527	0.486878	0.333394	0.436137	0.0835571	0.193894	0.32264	0.300379			0.163304	0.252785	0.255598	0.487673	0.281633	0.547801	0.633067	0.291354	0.944149
3.54902	0.220062	0.434835	0.753999	0.819283	0.10509	0.461747	0.783645	0.522951	0.409508	0.3182	0.234581	0.669448	0.736215	0.797599	0.795523	0.510958	0.841245	0.584768		0.254093	0.492823	0.633766	0.490724	0.472777	0.32506	0.440498	0.0791224	0.176935	0.307057	0.281423			0.159978	0.240171	0.238699	0.477946	0.281049	0.54589	0.638869	0.285794	0.945035
3.58824	0.210731	0.394031	0.729789	0.787503	0.095817	0.446991	0.759275	0.520135	0.400334	0.291915	0.227301	0.644166	0.707006	0.784698	0.799697	0.50519	0.866148	0.585404		0.25388	0.487884	0.668107	0.490126	0.452018	0.318923	0.443925	0.0752713	0.161673	0.291018	0.267133			0.155211	0.226409	0.224757	0.463244	0.281924	0.542543	0.647571	0.28079	0.941489
3.62745	0.202022	0.359927	0.709036	0.763264	0.0855139	0.424855	0.737612	0.516756	0.38824	0.269614	0.22002	0.621016	0.677937	0.774912	0.803869	0.494522	0.889105	0.590504		0.25388	0.478932	0.709414	0.487134	0.428123	0.312328	0.446729	0.0718869	0.14641	0.274977	0.255759			0.149889	0.209535	0.21504	0.444695	0.28484	0.539675	0.657722	0.275507	0.932625
3.66667	0.194401	0.331303	0.693039	0.750337	0.0752114	0.395729	0.714595	0.514784	0.375521	0.250099	0.212538	0.598871	0.64099	0.765124	0.804249	0.473183	0.911284	0.601338		0.253455	0.465813	0.75	0.484441	0.406189	0.305642	0.449844	0.0683859	0.132278	0.260311	0.244094			0.145565	0.189548	0.208492	0.422755	0.288046	0.536329	0.66715	0.270503	0.926418
3.70588	0.18787	0.307552	0.679205	0.745758	0.0675868	0.360388	0.692391	0.513094	0.363845	0.232178	0.204247	0.577415	0.592123	0.755783	0.804249	0.454152	0.933073	0.617272		0.251116	0.450532	0.782421	0.482047	0.38582	0.298223	0.452336	0.0651185	0.118711	0.246105	0.231555			0.142018	0.171199	0.204056	0.397647	0.293003	0.531549	0.675126	0.265777	0.922872
3.7451	0.18056	0.288063	0.666667	0.746835	0.0589324	0.326991	0.672624	0.50887	0.352794	0.215452	0.194944	0.555772	0.54214	0.747331	0.801214	0.44233	0.952918	0.634481		0.245375	0.432011	0.801633	0.480251	0.356835	0.292086	0.454206	0.0619676	0.105144	0.231898	0.216973			0.137361	0.153997	0.199831	0.371636	0.298251	0.525813	0.679477	0.258827	0.923758
3.78431	0.168896	0.269793	0.654562	0.748182	0.0500721	0.299806	0.654482	0.502112	0.341326	0.19992	0.186451	0.535257	0.499547	0.741993	0.79742	0.429066	0.965758	0.647228		0.236445	0.410557	0.79683	0.479952	0.320799	0.28595	0.454829	0.0589332	0.0921418	0.218607	0.199184			0.13204	0.139089	0.191804	0.347659	0.302624	0.520077	0.680928	0.25132	0.925532
3.82353	0.155054	0.253045	0.642023	0.747913	0.0414177	0.277282	0.635798	0.49479	0.328816	0.187177	0.17816	0.514241	0.462042	0.73799	0.789454	0.414937	0.965758	0.652326		0.225813	0.385399	0.774256	0.479354	0.287505	0.281645	0.454517	0.0558993	0.0814019	0.20715	0.179936			0.126164	0.127457	0.175539	0.325718	0.304373	0.514341	0.676577	0.243814	0.920213
3.86275	0.144013	0.237515	0.629918	0.751414	0.0356482	0.256699	0.615218	0.486342	0.315471	0.173636	0.170677	0.493601	0.431021	0.736655	0.779211	0.402249	0.961089	0.650414		0.215819	0.356691	0.735351	0.478456	0.261261	0.278806	0.451713	0.0530985	0.0695308	0.197526	0.16098			0.121397	0.116317	0.157795	0.305587	0.302624	0.509082	0.666424	0.236864	0.909574
3.90196	0.133282	0.222899	0.618677	0.758685	0.028436	0.238058	0.594909	0.478739	0.301501	0.160493	0.161577	0.473087	0.403485	0.736655	0.76745	0.385525	0.9607	0.643403		0.207952	0.328291	0.684198	0.477558	0.239718	0.276882	0.445483	0.0504143	0.0565285	0.188359	0.144648			0.11663	0.105177	0.143853	0.286135	0.299125	0.503346	0.651922	0.230748	0.893617
3.94118	0.123639	0.208892	0.608301	0.762994	0.0218419	0.219806	0.574059	0.474232	0.287531	0.148148	0.151264	0.452259	0.378599	0.733986	0.753793	0.361304	0.964981	0.633525		0.200723	0.302516	0.635927	0.477558	0.221308	0.27505	0.436449	0.0483137	0.0446574	0.180568	0.131817			0.112306	0.0914154	0.132023	0.267134	0.292128	0.496654	0.635967	0.225188	0.879434
3.98039	0.114463	0.195493	0.599654	0.754377	0.0173089	0.201941	0.551314	0.466629	0.274812	0.136998	0.140748	0.43256	0.355455	0.722866	0.738998	0.33391	0.97821	0.628425		0.194557	0.281062	0.595581	0.477857	0.204465	0.273127	0.424922	0.0464466	0.0356133	0.173236	0.119569			0.108204	0.0783091	0.121039	0.247907	0.280758	0.487572	0.617114	0.219349	0.861702
4.01961	0.106532	0.182095	0.583658	0.73283	0.0117453	0.186408	0.526672	0.434807	0.262719	0.125846	0.131446	0.414492	0.333496	0.707296	0.725721	0.309401	0.990272	0.631293		0.189666	0.26254	0.564121	0.476661	0.189189	0.27102	0.409346	0.0446961	0.027134	0.165903	0.10907			0.104545	0.0637289	0.110477	0.23117	0.268513	0.469407	0.596808	0.212955	0.837766
4.05882	0.0993779	0.169305	0.550367	0.698627	0.00886029	0.173204	0.499052	0.390031	0.251042	0.116288	0.116481	0.397052	0.312792	0.688612	0.709788	0.288062	0.998443	0.639898		0.185626	0.245562	0.542988	0.475763	0.174304	0.268914	0.390654	0.0432957	0.0203505	0.159487	0.0982791			0.100887	0.0507862	0.100971	0.216014	0.255685	0.43499	0.577229	0.206005	0.803191
4.09804	0.0933126	0.157125	0.527021	0.654996	0.00535772	0.161165	0.469537	0.346381	0.239783	0.10673	0.104955	0.378984	0.292715	0.66637	0.691198	0.271626	1	0.645634		0.182011	0.229048	0.529539	0.476062	0.160203	0.268181	0.370093	0.0418953	0.0146981	0.152612	0.0866142			0.0971175	0.0393185	0.0927332	0.202669	0.242565	0.397228	0.5591	0.198776	0.758864
4.13725	0.088025	0.145554	0.506268	0.605979	0.0039149	0.149903	0.43948	0.314278	0.228941	0.0975711	0.0964611	0.361355	0.273614	0.644573	0.668057	0.25692	0.979766	0.641173		0.178822	0.211916	0.523055	0.476062	0.146495	0.266716	0.349533	0.0402614	0.00904409	0.146655	0.0737822			0.0932371	0.0307996	0.0844949	0.190907	0.229446	0.367113	0.539521	0.191549	0.703013
4.17647	0.0830482	0.134592	0.48984	0.56154	0.00226684	0.139418	0.409965	0.290341	0.218515	0.0892079	0.0883723	0.344856	0.255908	0.623665	0.638846	0.241349	0.938521	0.625239		0.174144	0.196018	0.518012	0.473669	0.134744	0.264059	0.329907	0.0334929	0.00565234	0.140238	0.0603675			0.0890245	0.0244104	0.0779468	0.179824	0.21691	0.3413	0.512691	0.183486	0.643617
4.21569	0.078538	0.123934	0.474708	0.512793	0.0014422	0.129708	0.386136	0.268375	0.20809	0.0804456	0.0806876	0.328419	0.23862	0.606762	0.610015	0.226067	0.881323	0.598152		0.168616	0.181046	0.509126	0.470676	0.123776	0.259022	0.309657	0.0295249	0.00339174	0.134281	0.048119			0.0843682	0.0201507	0.0713986	0.168966	0.204665	0.318833	0.481507	0.176258	0.585992
4.2549	0.0743389	0.11419	0.448768	0.461352	0.00061817	0.120388	0.364744	0.248381	0.196831	0.0716846	0.0732055	0.312798	0.222029	0.592971	0.580425	0.211073	0.817509	0.570427		0.16245	0.166538	0.496878	0.467085	0.113592	0.249405	0.289408	0.0270742	0.00113115	0.128322	0.0417034			0.0797119	0.0167103	0.0652725	0.158335	0.19242	0.298279	0.448875	0.169308	0.534574
4.29412	0.0698291	0.105055	0.406398	0.418798	0.00041232	0.111457	0.343081	0.230358	0.185988	0.0633214	0.0671387	0.296989	0.206065	0.582741	0.551972	0.196079	0.756809	0.546527		0.156071	0.151566	0.48439	0.461999	0.103016	0.23704	0.268848	0.0246235	0	0.122823	0.0382038			0.0754989	0.0139251	0.0591464	0.148383	0.180758	0.279637	0.415518	0.162913	0.499114
4.33333	0.0653188	0.0959196	0.378297	0.387557	0	0.102524	0.32196	0.217403	0.175146	0.0545603	0.0618807	0.280615	0.191007	0.574734	0.523899	0.181661	0.713229	0.521351		0.149692	0.136595	0.470942	0.456912	0.0936157	0.223301	0.249222	0.0222898	0	0.117323	0.0347043			0.0711752	0.0113041	0.053443	0.139109	0.170554	0.261472	0.379986	0.157354	0.473404
4.37255	0.0609644	0.0867844	0.350195	0.359547	0	0.094369	0.300569	0.204449	0.164304	0.0469928	0.0554093	0.263425	0.17602	0.567171	0.49393	0.168397	0.683658	0.494902		0.144163	0.122241	0.460375	0.450329	0.0846063	0.207547	0.230218	0.0208894	0	0.111824	0.0312047			0.0668514	0.00802736	0.0473175	0.130061	0.161224	0.243786	0.345178	0.152627	0.455673
4.41176	0.0569207	0.0782585	0.326848	0.335847	0	0.0866016	0.279177	0.192058	0.153253	0.0390287	0.0503539	0.245671	0.16152	0.561833	0.47003	0.155132	0.664591	0.471638		0.137997	0.108967	0.446205	0.442848	0.076772	0.191885	0.213707	0.0186718	0	0.106783	0.0279965			0.0617518	0.00540629	0.0420361	0.121466	0.153061	0.226578	0.318346	0.148179	0.437056
4.45098	0.0533436	0.0697317	0.305231	0.31457	0	0.0792233	0.259139	0.179949	0.142619	0.0314612	0.0455005	0.227541	0.147578	0.55872	0.446509	0.141869	0.653308	0.450924		0.131405	0.0972372	0.427954	0.434171	0.0693302	0.177597	0.199065	0.017505	0	0.101742	0.0244969			0.0570954	0.0032767	0.0369664	0.113549	0.145481	0.211281	0.295142	0.144565	0.417553
4.4902	0.0499223	0.06151	0.285344	0.291947	0	0.071456	0.241538	0.169248	0.13261	0.0250896	0.0408492	0.210038	0.134054	0.556051	0.426404	0.128605	0.645914	0.431485		0.125027	0.0861244	0.408021	0.424895	0.0622797	0.164682	0.186293	0.0162212	0	0.0966999	0.0209974			0.0529932	0.00180226	0.0323194	0.105858	0.138776	0.19694	0.275563	0.141507	0.397162
4.52941	0.0466563	0.0538977	0.267617	0.267978	0	0.0648548	0.225833	0.15911	0.12427	0.0179212	0.0361984	0.19266	0.121297	0.552047	0.407056	0.115917	0.635408	0.413958		0.118435	0.0759376	0.39049	0.414123	0.0556205	0.154058	0.174766	0.0149377	0	0.0921174	0.0180814			0.0492239	0.00098296	0.0274607	0.098168	0.132361	0.184513	0.258159	0.138171	0.375886
4.56863	0.0435457	0.047503	0.251189	0.243469	0	0.0578645	0.211752	0.149254	0.116347	0.0119474	0.0317491	0.17547	0.108818	0.54226	0.388088	0.103229	0.617509	0.397706		0.111843	0.06714	0.376081	0.400958	0.0489624	0.144807	0.163551	0.0130703	0	0.0879927	0.0154567			0.045898	0.00049148	0.0228137	0.0909296	0.126239	0.172562	0.24293	0.134556	0.354609
4.60784	0.0404356	0.0414126	0.235625	0.217883	0	0.0516501	0.199025	0.140242	0.108841	0.00756631	0.027907	0.159975	0.0964795	0.526245	0.36874	0.0916955	0.592607	0.384321		0.10589	0.0603487	0.35927	0.385099	0.0426945	0.136747	0.153894	0.0119034	0	0.0847851	0.0131234			0.0429047	0.00032782	0.0185887	0.0839179	0.1207	0.162046	0.228426	0.130665	0.334221
4.64706	0.037325	0.0365408	0.220925	0.192566	0	0.0454369	0.187923	0.13123	0.102168	0.00398208	0.0238623	0.145671	0.0849773	0.506673	0.350531	0.0798728	0.567315	0.373167		0.100574	0.0544839	0.330452	0.368342	0.036819	0.130518	0.14486	0.0106196	0	0.0811183	0.0102074			0.0401331	0	0.0149981	0.0771321	0.115161	0.152008	0.213922	0.126216	0.312944
4.68627	0.0342145	0.0319732	0.205361	0.166173	0	0.0396117	0.178446	0.122219	0.0954964	0.00199164	0.0214356	0.132622	0.0748693	0.483986	0.332701	0.0689161	0.538911	0.364245		0.0956836	0.0496989	0.299472	0.350689	0.0317274	0.125664	0.13676	0.0102695	0	0.0779107	0.00787402			0.0376939	0	0.0120406	0.0705723	0.109621	0.142447	0.200869	0.12149	0.292553
4.72549	0.0312597	0.0283191	0.191093	0.142203	0	0.0333985	0.169781	0.112926	0.0892412	0.00079689	0.0186049	0.120326	0.0652492	0.460409	0.316388	0.0591116	0.505059	0.357553		0.0912184	0.0455316	0.271614	0.333034	0.027027	0.121451	0.129283	0.008986	0	0.0742439	0.00554068			0.0350331	0	0.00929468	0.064465	0.103498	0.133843	0.189267	0.116764	0.273051
4.76471	0.028305	0.024665	0.177259	0.120119	0	0.0279612	0.161657	0.103914	0.0831943	0	0.0159755	0.108846	0.0565353	0.439947	0.300455	0.0510381	0.470428	0.352454		0.0869655	0.0412101	0.246878	0.31538	0.0219354	0.11678	0.121807	0.00770218	0	0.070577	0.00408311			0.0323724	0	0.00654816	0.0583578	0.0979592	0.125239	0.179114	0.112038	0.254434
4.80392	0.0253498	0.0213152	0.163856	0.102343	0	0.022913	0.153804	0.0940577	0.0769391	0	0.0135488	0.0986198	0.0482399	0.424822	0.285281	0.0441177	0.435797	0.347992		0.0833513	0.0365797	0.232709	0.297726	0.0176263	0.110002	0.114642	0.00641837	0	0.0669116	0.00233333			0.0299335	0	0.00443599	0.0527032	0.0924201	0.116634	0.170412	0.107867	0.236702
4.84314	0.0225504	0.0182704	0.150022	0.0880689	0	0.0182528	0.146223	0.0847645	0.0713094	0	0.0121335	0.0886449	0.0405716	0.413257	0.271244	0.0383503	0.405058	0.342575		0.0797363	0.0316405	0.224303	0.280072	0.0137097	0.105239	0.1081	0.005485	0	0.0637026	0.00145844			0.0274946	0	0.00253485	0.0472746	0.0868802	0.109464	0.161711	0.103976	0.220745
4.88235	0.019751	0.0152256	0.136187	0.0764883	0	0.0143686	0.137829	0.0763162	0.0660969	0	0.0103135	0.0790464	0.0330429	0.402581	0.257587	0.032872	0.378989	0.334926		0.075909	0.0267018	0.216378	0.260922	0.0105758	0.101301	0.101869	0.00490139	0	0.060495	0.00058355			0.0251664	0	0.00147845	0.0420719	0.0816324	0.101816	0.152284	0.100917	0.205673
4.92157	0.0172628	0.01218	0.123217	0.0667926	0	0.0104854	0.129705	0.0675866	0.0619266	0	0.0091001	0.0705145	0.0266294	0.391905	0.24393	0.0276817	0.359144	0.322817		0.0720816	0.0222256	0.204371	0.241173	0.00783431	0.0973621	0.0956383	0.00455129	0	0.0568282	0.00029134			0.0230598	0	0.00084474	0.0373219	0.0766767	0.0951238	0.142131	0.0984153	0.191489
