# Supplementary material for: Microtubules restrict F-actin polymerization to the immune synapse via GEF-H1 to maintain polarity in lymphocytes
Source: eLife journal article supplement (doi:10.7554/elife.78330), 2022-09-16
Supplement: supp [file Figure7-Figure supplement 1B-C.xlsx]

## Sheet: Fig7-figsupp1B
%Coefficient of variation of Aspect Ratio of cell mask
RhoA WT DMSO	RhoA WT Noco	RhoA DN DMSO	RhoA DN Noco
5.219	2.769	4.765	1.831
5.968	5.504	2.244	1.816
2.707	11.65	1.977	3.525
1.761	6.578	4.95	13.26
1.885	11.44	5.807	12.18
7.568	8.67	1.859	5.542
6.372	13.31	5.775	1.786
7.856	2.636	3.103	4.634
	11.7	2.878	3.827
	5.075	2.316	2.836
	7.501	4.041
		2.835
		6.855
		1.986
2.487	7.1	6.686	8.346
3.342	12.49	4.177	2.158
18.1	12.86	3.595	2.188
7.215	19.87	3.854	2.171
2.476	5.962	2.421	4.795
5.382	9.318	3.069	3.158
6.185	5.146	3.143	7.435
5.65	15.54	2.416	11.98
	8.335		4.321
			8.267
			6.337
			2.525
			1.203
			4.676
			1.559

## Sheet: Fig7-figsupp1C
Median Solidity of cell mask
RhoA WT DMSO	RhoA WT Noco	RhoA DN DMSO	RhoA DN Noco
0.9195	0.958	0.958	0.959
0.961	0.924	0.954	0.95
0.958	0.912	0.961	0.96
0.961	0.893	0.96	0.886
0.962	0.899	0.957	0.933
0.938	0.94	0.959	0.957
0.946	0.867	0.951	0.966
0.958	0.939	0.963	0.962
	0.889	0.953	0.954
	0.954	0.956	0.947
	0.911	0.958
		0.958
		0.962
		0.961
0.958	0.911	0.956	0.95
0.962	0.887	0.962	0.956
0.899	0.889	0.957	0.939
0.955	0.865	0.952	0.936
0.957	0.902	0.953	0.908
0.919	0.888	0.959	0.962
0.962	0.954	0.954	0.956
0.961	0.832	0.959	0.94
	0.914		0.955
			0.936
			0.962
			0.962
			0.961
			0.963
			0.959
