# Supplementary material for: Microtubules restrict F-actin polymerization to the immune synapse via GEF-H1 to maintain polarity in lymphocytes
Source: eLife journal article supplement (doi:10.7554/elife.78330), 2022-09-16
Supplement: supp [file Figure7B_C.xlsx]

## Sheet: 7B
%Coefficient of Variation of Aspect Ratio 2D of cell mask
Control	RhoA CA
5.273	18.27
7.772	5.691
5.698	11.34
7.711	14.85
8.937	12.45
7.053	9.218
15.26	17.88
14.08	5.13
6.009	4.577
4.922	6.518
5.223	19.44
4.226	19.71
2.53	11.84
5.557	8.456
9.682	11.69
5.615	8.901
11.42	12.22
3.261	17.91
19.27	4.365
	18.71
	7.366

## Sheet: 7C
Median Solidity of cell mask
Control	RhoA CA
0.954	0.8265
0.949	0.9375
0.942	0.851
0.95	0.905
0.944	0.934
0.959	0.9015
0.941	0.931
0.9285	0.945
0.953	0.956
0.957	0.935
0.956	0.888
0.9415	0.823
0.957	0.859
0.959	0.942
0.943	0.879
0.943	0.92
0.955	0.928
0.952	0.849
0.932	0.942
	0.945
	0.9425
