# Supplementary material for: Microtubules restrict F-actin polymerization to the immune synapse via GEF-H1 to maintain polarity in lymphocytes
Source: eLife journal article supplement (doi:10.7554/elife.78330), 2022-09-16
Supplement: supp [file Figure7D.xlsx]

## Sheet: Sheet 1
Average distance of actin maxima to the droplet
Control	RhoA CA
4.569	4.766
0.4783	12.61
0.7754	3.651
2.345	8.025
0.835	0.4412
5.041	2.394
0.2244	6.164
9.646	8.113
6.376	13.09
0.07025	8.91
0.7651	11.02
4.958	4.644
0.2923	3.6
6.936	2.43
6.643	5.522
0.9335	2.673
5.308	8.647
1.249	5.153
3.413	9.413
	2.079
	1.903
