# Supplementary material for: Microtubules restrict F-actin polymerization to the immune synapse via GEF-H1 to maintain polarity in lymphocytes
Source: eLife journal article supplement (doi:10.7554/elife.78330), 2022-09-16
Supplement: supp [file Figure7F.xlsx]

## Sheet: Sheet 1
Median Solidity of cell mask
DMSO	NocoBlebb
0.924	0.961
0.955	0.953
0.949	0.958
0.963	0.939
0.945	0.969
0.956	0.923
0.954	0.937
0.952	0.945
0.946	0.896
0.9475	0.9425
0.957	0.959
0.942
0.9455
0.939
