# Supplementary material for: Microtubules restrict F-actin polymerization to the immune synapse via GEF-H1 to maintain polarity in lymphocytes
Source: eLife journal article supplement (doi:10.7554/elife.78330), 2022-09-16
Supplement: supp [file Figure7G_H.xlsx]

## Sheet: 7G
Aspect Ratio (2D) of cell mask
Time (min)	DMSO															NocoBlebb
0	1.265	1.233	1.02	1.06	1.348	1.046	1.098	1.066	1.056	1.074	1.014	1.091	1.102	1.014		1.079	1.129	1.017	1.026	1.231	1.533	1.137	1.032	1.891	1.04	1.046
0.5	1.281	1.253	1.07	1.104	1.274	1.161	1.066	1.084	1.006	1.146	1.159	1.086	1.041	1.127		1.058	1.197	1.015	1.027	1.247	1.476	1.107	1.062	1.919	1.031	1.05
1	1.3	1.204	1.187	1.153	1.112	1.221	1.633	1.043	1.068	1.259	1.207	1.149	1.1	1.156		1.031	1.39	1.039	1.047	1.251	1.469	1.096	1.058	1.927	1.065	1.054
1.5	1.324	1.287	1.177	1.204	1.077	1.167	1.551	1.066	1.121	1.155	1.204	1.223	1.128	1.18		1.149	1.373	1.139	1.043	1.239	1.497	1.243	1.047	1.94	1.081	1.014
2	1.306	1.326	1.175	1.12	1.078	1.197	1.376	1.064	1.144	1.129	1.343	1.187	1.081	1.188		1.189	1.235	1.231	1.083	1.225	1.544	1.347	1.143	1.958	1.12	1.082
2.5	1.302	1.32	1.192	1.073	1.144	1.161	1.397	1.053	1.147	1.148	1.233	1.187	1.084	1.241		1.237	1.262	1.192	1.075	1.217	1.561	1.367	1.131	1.969	1.151	1.147
3	1.308	1.268	1.143	1.075	1.153	1.212	1.549	1.059	1.154	1.102	1.177	1.218	1.063	1.287		1.172	1.372	1.165	1.136	1.204	1.608	1.335	1.111	1.965	1.177	1.141
3.5	1.29	1.228	1.084	1.104	1.28	1.153	1.406	1.096	1.256	1.119	1.16	1.247	1.117	1.286		1.132	1.379	1.198	1.157	1.18	1.633	1.281	1.113	1.984	1.208	1.137
4	1.27	1.222	1.064	1.094	1.465	1.074	1.385	1.243	1.443	1.07	1.173	1.249	1.191	1.211		1.152	1.437	1.182	1.153	1.157	1.636	1.41	1.137	1.975	1.258	1.114
4.5	1.268	1.162	1.127	1.083	1.515	1.106	1.207	1.432	1.599	1.11	1.1	1.317	1.107	1.178		1.166	1.387	1.205	1.186	1.134	1.609	1.47	1.143	1.976	1.312	1.121
5	1.263	1.184	1.146	1.08	1.475	1.088	1.119	1.179	1.659	1.206	1.167	1.336	1.066	1.049		1.171	1.255	1.209	1.236	1.12	1.654	1.361	1.156	1.801	1.26	1.133
5.5	1.261	1.186	1.103	1.04	1.427	1.138	1.028	1.184	1.698	1.173	1.165	1.349	1.187	1.053		1.124	1.178	1.231	1.248	1.115	1.676	1.438	1.198	1.742	1.326	1.127
6	1.231	1.132	1.121	1.014	1.485	1.113	1.096	1.146	1.638	1.254	1.146	1.281	1.167	1.047		1.032	1.085	1.296	1.247	1.138	1.628	1.419	1.162	1.719	1.383	1.126
6.5	1.236	1.125	1.152	1.154	1.567	1.088	1.058	1.09	1.694	1.286	1.093	1.291	1.203	1.042		1.045	1.068	1.322	1.32	1.195	1.627	1.508	1.186	1.292	1.353	1.185
7	1.217	1.112	1.15	1.218	1.515	1.087	1.038	1.056	1.65	1.292	1.135	1.274	1.125	1.093		1.04	1.065	1.338	1.355	1.16	1.507	1.621	1.17	1.411	1.346	1.201
7.5	1.233	1.13	1.133	1.307	1.563	1.101	1.076	1.034	1.48	1.32	1.14	1.297	1.143	1.06		1.04	1.064	1.332	1.408	1.084	1.381	1.516	1.166	1.43	1.341	1.205
8	1.24	1.125	1.197	1.296	1.618	1.084	1.033	1.016	1.408	1.301	1.11	1.281	1.108	1.121		1.036	1.035	1.358	1.498	1.024	1.252	1.293	1.184	1.48	1.429	1.198
8.5	1.23	1.109	1.28	1.337	1.642	1.099	1.051	1.067	1.461	1.333	1.145	1.326	1.104	1.156		1.048	1.073	1.367	1.471	1.01	1.185	1.251	1.168	1.514	1.48	1.223
9	1.268	1.097	1.363	1.318	1.636	1.095	1.044	1.1	1.511	1.369	1.108	1.361	1.068	1.165		1.043	1.072	1.381	1.574	1.016	1.209	1.31	1.155	1.63	1.475	1.254
9.5	1.251	1.078	1.302	1.31	1.623	1.267	1.039	1.053	1.517	1.459	1.057	1.37	1.078	1.111		1.024	1.089	1.347	1.698	1.017	1.326	1.253	1.174	1.663	1.568	1.244
10	1.248	1.056	1.339	1.321	1.661	1.308	1.076	1.194	1.285	1.536	1.101	1.344	1.042	1.116		1.017	1.092	1.327	1.681	1.005	1.328	1.271	1.137	1.738	1.559	1.201
10.5	1.37	1.068	1.382	1.317	1.614	1.275	1.085	1.289	1.244	1.469	1.087	1.384	1.068	1.106		1.046	1.09	1.41	1.59	1.011	1.351	1.199	1.116	1.739	1.688	1.175
11	1.312	1.065	1.405	1.335	1.457	1.228	1.024	1.33	1.201	1.513	1.084	1.388	1.021	1.114		1.041	1.119	1.44	1.674	1.023	1.376	1.284	1.132	1.74	1.682	1.207
11.5	1.214	1.063	1.405	1.377	1.51	1.176	1.077	1.402	1.24	1.589	1.124	1.389	1.046	1.121		1.022	1.112	1.416	1.745	1.021	1.376	1.35	1.112	1.728	1.694	1.199
12	1.189	1.063	1.41	1.421	1.547	1.085	1.021	1.31	1.151	1.587	1.12	1.441	1.031	1.184		1.032	1.112	1.466	1.716	1.025	1.374	1.282	1.172	1.68	1.712	1.195
12.5	1.158	1.062	1.447	1.407	1.343	1.116	1.006	1.378	1.109	1.591	1.084	1.431	1.01	1.141		1.032	1.215	1.439	1.726	1.024	1.379	1.371	1.087	1.667	1.683	1.259
13	1.196	1.056	1.482	1.332	1.438	1.076	1.085	1.363	1.216	1.506	1.115	1.406	1.027	1.302		1.04	1.178	1.428	1.731	1.023	1.394	1.48	1.08	1.606	1.768	1.27
13.5	1.316	1.083	1.526	1.339	1.429	1.08	1.017	1.115	1.384	1.529	1.137	1.451	1.102	1.444		1.061	1.121	1.442	1.796	1.022	1.422	1.354	1.092	1.568	1.823	1.268
14	1.287	1.102	1.486	1.259	1.52	1.09	1.016	1.06	1.299	1.416	1.108	1.398	1.083	1.409		1.046	1.139	1.405	1.794	1.019	1.402	1.293	1.117	1.536	1.897	1.312
14.5	1.234	1.069	1.466	1.263	1.438	1.085	1.045	1.06	1.243	1.389	1.124	1.415	1.026	1.301		1.041	1.164	1.34	1.803	1.024	1.41	1.375	1.112	1.515	1.919	1.338
15	1.207	1.053	1.466	1.21	1.362	1.059	1.093	1.047	1.536	1.33	1.124	1.442	1.006	1.231		1.038	1.205	1.367	1.831	1.03	1.423	1.444	1.153	1.513	1.835	1.379
15.5	1.17	1.053	1.499	1.206	1.566	1.083	1.057	1.071	1.575	1.486	1.104	1.513	1.051	1.148		1.038	1.209	1.347	1.885	1.024	1.506	1.403	1.17	1.485	1.764	1.395
16	1.18	1.047	1.488	1.23	1.493	1.055	1.039	1.005	1.509	1.457	1.09	1.454	1.018	1.079		1.04	1.211	1.413	1.95	1.028	1.579	1.289	1.151	1.452	1.847	1.379
16.5	1.158	1.068	1.451	1.139	1.389	1.057	1.061	1.012	1.526	1.516	1.062	1.431	1.095	1.066		1.035	1.241	1.478	2.031	1.032	1.62	1.303	1.175	1.426	1.894	1.437
17	1.151	1.043	1.408	1.081	1.43	1.025	1.096	1.069	1.522	1.44	1.099	1.45	1.145	1.098		1.058	1.279	1.506	1.998	1.032	1.667	1.333	1.167	1.398	1.982	1.452
17.5	1.124	1.069	1.425	1.1	1.418	1.029	1.02	1.127	1.423	1.47	1.128	1.56	1.092	1.151		1.058	1.272	1.542	1.951	1.03	1.57	1.276	1.135	1.367	2.13	1.359
18	1.198	1.085	1.475	1.065	1.264	1.043	1.028	1.095	1.321	1.575	1.105	1.501	1.043	1.227		1.089	1.245	1.59	1.991	1.097	1.554	1.269	1.074	1.372	2.031	1.401
18.5	1.142	1.048	1.443	1.053	1.35	1.025	1.061	1.086	1.108	1.671	1.091	1.535	1.038	1.165		1.046	1.253	1.581	2.063	1.167	1.598	1.394	1.105	1.371	1.973	1.408
19	1.144	1.066	1.277	1.055	1.3	1.048	1.057	1.137	1.048	1.533	1.105	1.473	1.076	1.108		1.05	1.283	1.572	2.078	1.101	1.799	1.506	1.191	1.391	2.008	1.405
19.5	1.205	1.085	1.216	1.047	1.381	1.03	1.089	1.105	1.03	1.622	1.077	1.5	1.117	1.101		1.023	1.286	1.503	2.074	1.02	1.861	1.466	1.119	1.412	2.007	1.403
20	1.108	1.053	1.242	1.093	1.43	1.054	1.016	1.146	1.041	1.418	1.053	1.566	1.125	1.065		1.019	1.331	1.516	1.989	1.02	1.919	1.52	1.083	1.429	1.993	1.348
20.5	1.089	1.064	1.325	1.069	1.339	1.048	1.015	1.092	1.052	1.252	1.069	1.538	1.069	1.071		1.03	1.331	1.514	1.875	1.027	1.91	1.308	1.043	1.432	1.824	1.399
21	1.115	1.044	1.307	1.082	1.297	1.029	1.09	1.071	1.067	1.352	1.182	1.578	1.121	1.12		1.027	1.306	1.616	1.838	1.027	1.96	1.304	1.043	1.416	1.591	1.379
21.5	1.197	1.05	1.346	1.044	1.242	1.039	1.094	1.073	1.168	1.334	1.274	1.555	1.085	1.115		1.03	1.318	1.65	1.858	1.025	2.061	1.44	1.133	1.396	1.727	1.348
22	1.199	1.023	1.427	1.1	1.2	1.039	1.039	1.042	1.2	1.347	1.2	1.616	1.088	1.12		1.093	1.3	1.654	1.991	1.032	2.068	1.552	1.128	1.41	1.718	1.366
22.5	1.187	1.016	1.402	1.099	1.295	1.024	1.058	1.062	1.172	1.29	1.122	1.592	1.103	1.061		1.072	1.269	1.626	1.983	1.03	1.992	1.385	1.117	1.418	1.722	1.393
23	1.132	1.048	1.375	1.032	1.385	1.016	1.045	1.148	1.155	1.416	1.115	1.599	1.122	1.071		1.04	1.265	1.646	2.008	1.032	1.984	1.264	1.114	1.485	1.594	1.441
23.5	1.133	1.013	1.344	1.062	1.266	1.059	1.004	1.147	1.137	1.508	1.155	1.574	1.057	1.019		1.037	1.288	1.676	2.064	1.034	1.931	1.519	1.1	1.506	1.559	1.602
24	1.139	1.027	1.469	1.064	1.203	1.068	1.038	1.151	1.295	1.372	1.2	1.622	1.048	1.038		1.014	1.324	1.529	2.119	1.034	2.015	1.427	1.103	1.463	1.485	1.724
24.5	1.079	1.029	1.355	1.071	1.206	1.054	1.066	1.166	1.327	1.27	1.292	1.615	1.103	1.053		1.026	1.365	1.565	2.152	1.013	1.986	1.4	1.043	1.463	1.536	1.618
25	1.115	1.035	1.344	1.075	1.217	1.072	1.02	1.045	1.207	1.258	1.228	1.653	1.093	1.103		1.02	1.37	1.562	2.179	1.017	1.944	1.367	1.056	1.489	1.515	1.493
25.5	1.144	1.042	1.266	1.019	1.166	1.051	1.073	1.074	1.074	1.221	1.105	1.64	1.199	1.066		1.026	1.368	1.509	2.142	1.029	1.972	1.376	1.028		1.456	1.456
26	1.238	1.049	1.253	1.029	1.151	1.071	1.033	1.049	1.054	1.444	1.097	1.601	1.1	1.055		1.02	1.41	1.555	2.048	1.03	1.937	1.419	1.086		1.517	1.591
26.5	1.178	1.051	1.276	1.057	1.185	1.055	1.043	1.082	1.027	1.359	1.076	1.612	1.094	1.039		1.027	1.345	1.597	1.998	1.026	1.864	1.242	1.127		1.323	1.631
27	1.142	1.036	1.271	1.055	1.284	1.06	1.073	1.057	1.057	1.286	1.138	1.607	1.085	1.057		1.016	1.399	1.486	1.86	1.022	1.888	1.198	1.197		1.294	1.572
27.5	1.151	1.039	1.2	1.045	1.251	1.064	1.072	1.051	1.071	1.216	1.256	1.627	1.061	1.04		1.021	1.432	1.539	1.886	1.025	1.872	1.242	1.136		1.416	1.624
28	1.203	1.046	1.191	1.019	1.278	1.057	1.051	1.07	1.035	1.277	1.22	1.563	1.035	1.053		1.025	1.4	1.678	2.179	1.02	1.962	1.413	1.203		1.619	1.671
28.5	1.249	1.058	1.153	1.058	1.265	1.036	1.086	1.076	1.072	1.299	1.151	1.576	1.008	1.06		1.019	1.402	1.555	2.057	1.021	2.044	1.402	1.121		1.716	1.663
29	1.244	1.058	1.15	1.025	1.329	1.038	1.079	1.031	1.026	1.388	1.125	1.643	1.034	1.095		1.035	1.421	1.571	2.034	1.024	2.07	1.386	1.072		1.578	1.835
29.5	1.159	1.066	1.138	1.038	1.242	1.039	1.098	1.017	1.024	1.245	1.18	1.631	1.132	1.039		1.03	1.447	1.685	2.046	1.023	2.131	1.606	1.104		1.507	1.793
30	1.136	1.022	1.204	1.046	1.144	1.029	1.095	1.061	1.057	1.217	1.074	1.622	1.143	1.047		1.024	1.508	1.701	2.068	1.035	2.255	1.412	1.075		1.519	1.724

## Sheet: 7H
Final image 2D Aspect ratio of mask
DMSO	NocoBlebb			AR <1.2	AR >1.2
1.35	2.203		DMSO	81.6	18.4
1.443	2.536		NocoBlebb	16.1	83.9
1.432	1.45
1.067	1.512
1.068	1.897
1.324	1.42
1.089	1.278
1.076	1.631
1.021	1.561
1.033	1.066
1.03	1.445
1.319	1.896
1.045	1.881
1.631	1.879
1.045	1.12
1.044	1.177
1.26	1.529
1.157	1.391
1.14	1.165
1.089	1.286
1.144	1.07
1.212	2.048
1.033	1.415
1.041	1.713
1.615	1.546
1.098	1.221
1.048	1.483
1.115	1.464
1.08	1.4
1.081	1.455
1.113	1.557
1.049
1.048
1.207
1.04
1.026
1.06
1.051
1.05
1.188
1.106
1.091
1.176
1.071
1.062
1.231
1.13
1.112
1.059
