# Supplementary material for: Microtubules restrict F-actin polymerization to the immune synapse via GEF-H1 to maintain polarity in lymphocytes
Source: eLife journal article supplement (doi:10.7554/elife.78330), 2022-09-16
Supplement: supp [file Figure7I.xlsx]

## Sheet: Sheet 1
Average distance of actin maxima to droplet (µm)
DMSO	NocoBlebb
3.942	0.107
1.176	6.961
9.626	10.04
3.974	11.8
11.74	4.129
5.344	9.21
4.335	8.248
3.415	5.182
0.9031	11.74
11.65	11.6
3.857	10.24
1.008
2.981
0.5824
