# Supplementary material for: Microtubules restrict F-actin polymerization to the immune synapse via GEF-H1 to maintain polarity in lymphocytes
Source: eLife journal article supplement (doi:10.7554/elife.78330), 2022-09-16
Supplement: supp [file Figure8D.xlsx]

## Sheet: Sheet 1
Difference in actin enrichment between the 2 immune synapses
DMSO	NocoBlebb
0.014	0.032
0.023	0.032
0.016	0.04
0.062	0.028
0.052	0.005
0.130679	0.031
0.0779587	0.057
0.128	0
0.119	0.034
0.15	0.01
0.288	0.079
0.341	0.02
0.121	0.035
0.303	0.038
0.111	0.135
0.027	0.081
0.002	0.073
0.015	0.025
0.036	0.09
0.078	0.015
0.324	0.091
0.057	0.106
0.336	0.106
0.077	0.038
0.091	0.115
0.149	0.114
0.091	0.106
0.029	0.035
0.034	0.05
0.013	0.024
0.058	0.078
0.189	0.003
0.069	0.084
0.045963	0.253
0.085	0.048
0.038	0.023
0.132	0.035
0.229	0.022
0.049	0.113
0.062	0.039
0.116	0.074
0.091	0.008
0.299	0.029
0.287	0.062
0.101	0.105
0.07	0.029
0.0744222	0.143
0.014	0.07
0.013	0.016
0.083	0.024
0.125	0.014
0.061	0.104
0.044	0.01
0.142	0.024
0.047	0.037
0.061	0.12
0.017	0.049
0.003	0.033
0.073	0.033
0.084	0.055
0.05	0.161
0.008	0.011
0.068	0.012
0.062	0.057
0.155	0.001
0.081	0.052
0.062	0.131
0.047	0.073
0.014	0.017
0.091	0.087
0.181	0.049
0.016	0.072
0.053	0.034
0.008	0.032
0.038	0.113
0.068	0.073
0.026
0.145
0.122
0.087
0.049
0.072
0.034
0.032
0.113
0.073
