# Supplementary material for: Microtubules restrict F-actin polymerization to the immune synapse via GEF-H1 to maintain polarity in lymphocytes
Source: eLife journal article supplement (doi:10.7554/elife.78330), 2022-09-16
Supplement: supp [file Figure8E.xlsx]

## Sheet: Sheet 1
Number of immune synapses per cell
						Percentage of cells	1 synapse	2 synapses
siCtrl DMSO	siCtrl Noco Blebb	siArhgef2 DMSO	siArhgef2 Noco Blebb			siCtrl DMSO	62.963	37.037
1	1	1	1			siCtrl Noco	14.5161	85.4839
1	1	1	1			siGEF H1 DMSO	56.6038	43.3962
1	1	1	1			siGEF H1 Noco	49.0909	50.9091
1	1	1	1
1	2	1	1
1	2	1	1
1	2	1	1
1	2	1	1
1	2	1	1
1	2	1	1
1	2	1	1
1	2	1	1
1	2	1	1
1	2	1	2
1	2	1	2
1	2	2	2
1	2	2	2
2	2	2	2
2	2	2	2
2	2	2	2
2	2	2	2
2	2	2	2
2	2	2	2
2	2	2	2
2	2		2
	2		2
	2		2
	2		2
			2
1	1	1	1
1	1	1	1
1	1	1	1
1	1	1	1
1	1	1	1
1	2	1	1
1	2	1	1
1	2	1	1
1	2	1	1
1	2	1	1
1	2	1	1
1	2	1	1
1	2	1	1
1	2	1	1
1	2	1	2
1	2	2	2
1	2	2	2
	2	2	2
	2	2	2
2	2	2	2
2	2	2	2
2	2	2	2
2	2	2	2
2	2	2	2
2	2	2	2
2	2	2	2
2	2	2
2	2	2
2	2	2
2	2
2	2
	2
	2
	2
