# Supplementary material for: Microtubules restrict F-actin polymerization to the immune synapse via GEF-H1 to maintain polarity in lymphocytes
Source: eLife journal article supplement (doi:10.7554/elife.78330), 2022-09-16
Supplement: supp [file Figure8G.xlsx]

## Sheet: DMSO
Illustration of trajectories - centered - DMSO
Cell number ->	1		2		3		4		5		6		7		8		9		10		11		12		13		14
Time (min)	PosX_center	PosY_center	PosX_center	PosY_center	PosX_center	PosY_center	PosX_center	PosY_center	PosX_center	PosY_center	PosX_center	PosY_center	PosX_center	PosY_center	PosX_center	PosY_center	PosX_center	PosY_center	PosX_center	PosY_center	PosX_center	PosY_center	PosX_center	PosY_center	PosX_center	PosY_center	PosX_center	PosY_center
0	0	0	0	0	0	0	0	0	0	0	0	0	0	0	0	0	0	0	0	0	0	0	0	0	0	0	0	0
4	0	0	5.805	-1.29	0	0	-0.645	4.515	0	0	0	-2.58	0	0	0	0	7.095	2.58	0	0	0	0	-3.87	-1.935	0	0	0	2.58
8	-3.225	-0.645	3.225	-6.45	0	1.29	-3.87	2.58	-3.225	-4.515	0.645	-3.87	-2.58	4.515	0	0	15.48	1.935	0	0	0	0	-7.74	3.87	-0.645	-5.805	1.935	3.225
12	-3.225	-0.645	-5.16	-5.805	0	1.29	-3.87	2.58	0.645	-3.87	0.645	-4.515	-3.225	9.03	0	0	16.77	1.29	-1.935	-1.29	0	0	-7.74	3.87	1.29	-9.03	-0.645	7.74
16	-3.225	-0.645	-3.87	-3.225	0	1.29	-3.87	2.58	3.87	-3.225	0.645	-4.515	-5.805	9.675	0	0	21.285	1.29	-1.29	-0.645	0	-1.29	-7.74	3.87	2.58	-10.965	-3.87	12.255
20	-3.225	-0.645	0.645	1.29	0	1.29	-5.16	1.29	3.225	-1.29	0.645	-4.515	-5.805	7.095	1.29	0.645	16.125	1.29	-1.29	-0.645	0	-1.29	-9.03	7.74	2.58	-11.61	-2.58	17.415
24	-3.225	-0.645	0.645	1.29	0	1.29	-5.16	1.935	8.385	1.29	0.645	-4.515	-4.515	8.385	1.29	1.29	19.35	-1.29	-1.29	-0.645	0	-1.29	-10.965	11.61	5.805	-10.32	-5.16	19.35
28	-3.225	-0.645	-2.58	-1.29	0	1.29	-5.16	1.935	13.545	9.03	3.225	-4.515	-4.515	8.385	1.29	1.29	19.35	-3.87	-1.29	-0.645	0	-1.29	-11.61	11.61	8.385	-13.545	-4.515	25.8
32	-4.515	6.45	-3.225	-7.74	0	1.29	-5.16	1.935	17.415	9.03	7.095	-4.515	-4.515	8.385	1.29	1.29	21.93	-5.16	-1.29	-0.645	0	-1.29	-14.835	14.835	13.545	-12.9	-7.74	28.38
36	-3.87	8.385	-3.225	-9.675	0	1.29	-5.16	1.935	7.74	10.32	11.61	-3.87	-4.515	8.385	1.29	1.29	21.93	-5.16	-1.29	-0.645	0	-1.29	-16.77	19.995	14.19	-12.255	-11.61	30.315
40	-4.515	1.935	-3.225	-9.03	0	1.29	-3.87	9.03	7.74	5.805	13.545	-1.935	-5.16	7.74	1.29	1.29	21.93	-5.805	0.645	-1.29	0	-1.29	-18.705	22.575	15.48	-17.415	-16.125	33.54
44	-6.45	1.935	-5.805	-9.03	0	1.29	-3.87	9.03	11.61	4.515	12.9	-5.16	-5.16	7.74	1.29	1.29	26.445	-10.965	0.645	-1.29	0	-1.29	-21.93	25.8	12.9	-20.64	-23.22	35.475
48	-8.385	2.58	-4.515	-7.095	0	1.29	-7.095	12.255	12.255	4.515	12.255	-5.16	-5.16	7.74	1.29	1.29	28.38	-11.61	-1.935	-2.58	0	-1.29	-26.445	30.315	14.19	-23.22	-25.8	36.12
52	-9.675	1.29	-4.515	-7.095	0	1.29	-5.805	11.61	14.19	5.805	12.255	-5.16	-7.095	5.16	1.29	1.29	34.185	-14.835	-1.935	-2.58	0	-1.935	-22.575	34.185	14.835	-25.155	-27.09	34.185
56	-10.965	-1.935	-4.515	-7.74	0	1.29	-5.805	11.61	16.125	9.675	16.125	-10.32	-7.095	3.87	1.29	1.29	35.475	-18.06	-2.58	-5.805	0	-1.935	-21.93	38.055	14.19	-27.735	-28.38	36.765
60	-9.675	-0.645	-1.29	-10.32	0	1.29	-5.805	11.61	16.125	10.32	19.35	-9.675	-7.095	3.225	1.29	1.29	39.345	-23.865	-2.58	-5.805	0	-1.935	-18.06	37.41	14.835	-31.605	-29.67	35.475
64	-5.805	-1.29	-1.29	-10.965	0	1.29	-5.805	11.61	19.995	15.48	19.35	-10.32	-8.385	0	1.29	1.29	39.99	-23.865	-2.58	-5.805	0	-0.645	-15.48	41.28	12.9	-28.38	-34.185	32.895
68	-5.805	-3.225	0	-10.965	0	1.29	-5.805	11.61	23.865	20.64	19.35	-10.32	-10.32	-0.645	1.29	1.29	41.925	-28.38	-2.58	-3.87	0	-0.645	-19.35	38.055	12.9	-27.735	-38.7	35.475
72	-4.515	-2.58	1.935	-12.255	0	1.29	-5.805	7.74	27.735	22.575	19.35	-10.32	-10.32	-1.935	1.29	1.29	45.795	-31.605	-2.58	-2.58	0	0	-17.415	40.635	9.675	-30.315	-42.57	39.345
76	-4.515	-2.58	1.935	-12.255	0	1.29	-4.515	8.385	30.315	24.51	19.35	-10.32	-13.545	-3.87	1.29	1.29	42.57	-19.995	-2.58	-2.58	0	0	-13.545	43.215	6.45	-29.67	-45.15	38.055
80	-5.805	1.29	1.935	-12.255	0	1.29	-4.515	8.385	33.54	25.8	21.93	-7.095	-14.19	-7.095	0	0	41.925	-16.125	-2.58	-2.58	0	0	-8.385	42.57	0	-31.605	-51.6	41.28
84	-5.805	1.29	7.74	-9.675	2.58	3.87	-4.515	8.385	38.7	25.8	23.22	-12.255	-14.835	-9.03	0	0	42.57	-16.125	-3.225	-2.58	-0.645	0.645	-2.58	42.57	-5.16	-32.895	-51.6	44.505
88	-5.805	1.29	5.16	-7.095	1.935	3.225	-4.515	8.385	37.41	25.8	27.09	-9.675	-19.35	-12.255	0	0	41.28	-21.285	-5.805	-3.225	-0.645	0.645	5.16	43.86	-10.32	-32.895	-56.115	43.86
92	-6.45	0.645	6.45	-7.74	1.935	3.225	-5.805	10.965	38.055	28.38	26.445	-9.03	-21.285	-15.48	0	0	42.57	-18.06	-5.805	-3.225	-0.645	0.645	6.45	43.215	-12.9	-31.605	-58.05	38.7
96	-6.45	0.645	7.095	-9.03	-1.29	1.935	-5.805	10.965	41.28	28.38	25.8	-5.16	-23.865	-16.77	0	0	46.44	-23.865	-5.805	-3.225	-0.645	0.645	15.48	39.345	-15.48	-29.025	-63.21	35.475
100	-6.45	0.645	5.16	-12.9	0	3.225	-5.805	10.965	45.795	29.025	28.38	-7.095	-27.09	-18.06	0	0	50.955	-25.155	-5.805	-3.225	-0.645	0.645	20.64	36.12	-16.125	-29.025	-62.565	32.895
104	-6.45	0.645	3.225	-16.125	0	3.225	-5.805	10.965	45.795	29.025	31.605	-3.87	-27.735	-18.06	0	0	50.955	-32.895	-5.805	-3.225	-0.645	0.645	23.865	35.475	-15.48	-26.445	-61.92	36.765
108	-7.095	2.58	8.385	-17.415	0	3.225	-5.805	10.965	45.795	29.025	32.25	0	-27.735	-18.06	0	0	53.535	-31.605	-5.805	-3.225	-0.645	0.645	30.96	34.185	-18.06	-28.38	-59.985	34.83
112	-5.16	0.645	8.385	-21.285	0	2.58	-5.805	10.32	45.795	29.025	38.055	5.805	-32.895	-22.575	-1.935	-0.645	56.115	-34.83	-5.805	-3.225	-0.645	0.645	39.345	34.83	-15.48	-29.025	-59.985	34.83
116	-1.935	-5.805	10.32	-21.285	-1.935	-0.645	-5.805	10.32	47.085	39.345	36.12	7.74	-33.54	-21.93	-1.935	-0.645	56.76	-35.475	-9.03	-3.87	-0.645	0.645	48.375	34.83	-14.19	-29.67	-59.34	32.25
120	4.515	-13.545	10.32	-23.865	-3.87	3.225	-5.805	10.32	45.15	45.15	29.67	12.255	-33.54	-21.93	-5.805	-0.645	59.34	-39.99	-10.965	-5.16	-0.645	0.645	55.47	35.475	-16.125	-25.155	-58.695	32.895
0.283372	0.659686
0.0824361	0.189799
0.594702	0.292818
0.485018	0.455334
0.213381	0.234125
0.249792	0.168322
0.542728	0.659643
0	0.515417
0.124346	0.183636
0.308073	0.0607989
0.51361	0.315327
0.15253	0.480876
0.0206142	0.578409
0.190744	0.097719
0.44868	0.185371
1	0.341893
0.995299	0.488932
0.0484653	0.124891
0.92621	0.186653
0.0283065	0.0886915
0.790569	0.0953512
0.707107	0.0821303
1	0.590914
0.0829345	0.257109
0.303784	0.229311
1	0.0956543
0.323929	0.0431966
0.071609	0.470741
0.088813	0.664648
0.562159	0.139534
0.869942	0.162737
0.683988	0.630348
0.114565	0.182997
1	0.593732
0.241906	0.6184
0.589015	0.216994
0.82988	0.0876411
0.92621	0.0529211
	0.24401
	0.240381
	0.305086
	0.0748325
	0.0651492
	0.143152
	0.0422565
	0.217298
	0.15079
	0.0766411
	0.0499695
	0.149802
	0.0633309
	0.087602
	0.0519303
	0.0934348
	0.403748
	0.305928
	0.106084
	0.0699704
	0.158006
	0.0427415
	0.159373
	0.164485
	0.139015
	0.308426
	0.0769388
	0.41077
	0.0401989
	0.193511
	0.0758156
	0.0696237
	0.0429895
	0.0697924
	0.591436
	0.553012
	0.0401904
	0.0230659
	0.15333
	0.175944
	0.674483
	0.328701
	0.301126
	0.737761
	0.0475023
	0.0498922
	0.132569
	0.578745
	0.332184
	0.711707
	0.102606
	0.0699239

## Sheet: Noco
Illustration of trajectories - centered - Noco
Cell number ->	1		2		3		4		5		6		7		8		9		10		11		12		13		14
Time(min)	PosX_center	PosY_center	PosX_center	PosY_center	PosX_center	PosY_center	PosX_center	PosY_center	PosX_center	PosY_center	PosX_center	PosY_center	PosX_center	PosY_center	PosX_center	PosY_center	PosX_center	PosY_center	PosX_center	PosY_center	PosX_center	PosY_center	PosX_center	PosY_center	PosX_center	PosY_center	PosX_center	PosY_center
0	0	0	0	0	0	0	0	0	0	0	0	0	0	0	0	0	0	0	0	0	0	0	0	0	0	0	0	0
4	2.58	-2.58	-2.58	3.87	13.545	1.935	1.935	-2.58	-1.29	5.805	0.645	0	3.225	2.58	1.935	5.16	-0.645	-6.45	-1.29	-3.87	3.225	-1.935	5.16	1.935	0	-0.645	0	0
8	0.645	1.29	-2.58	3.87	32.25	11.61	8.385	1.935	-1.29	5.805	3.225	-0.645	4.515	3.225	0.645	5.16	1.29	-10.965	-3.225	-6.45	0	-0.645	11.61	1.29	-2.58	5.805	0	0
12	0.645	1.29	-2.58	3.87	39.99	20.64	8.385	1.935	1.935	7.095	5.805	-2.58	3.87	0.645	0.645	5.16	3.87	-2.58	-2.58	-7.74	-3.225	-4.515	8.385	-1.935	1.29	7.74	0	0
16	-3.225	0.645	-14.835	7.095	43.86	24.51	8.385	1.935	7.095	15.48	0.645	-3.225	0	1.29	0.645	0.645	-0.645	0	1.935	2.58	0	-1.935	5.16	1.935	0	7.095	0	0
20	-8.385	3.225	-10.965	1.935	59.985	27.09	2.58	-0.645	5.16	11.61	-1.29	-4.515	1.935	5.805	0.645	0.645	-1.935	-1.29	-0.645	-0.645	-2.58	-0.645	8.385	4.515	0	7.095	0.645	-0.645
24	-5.16	-3.87	-5.805	5.805	63.21	31.605	5.16	5.16	0	14.835	-2.58	-4.515	0.645	2.58	-1.935	0.645	-5.16	4.515	-0.645	-3.225	-2.58	-0.645	15.48	3.225	0	7.095	0.645	-0.645
28	-4.515	1.29	-7.095	3.225	69.66	41.28	6.45	1.935	-10.32	19.35	-1.29	-3.225	0.645	2.58	-2.58	-3.225	-3.87	1.935	-0.645	-4.515	-3.87	-1.29	15.48	2.58	0	7.095	-0.645	-2.58
32	-1.935	0	-7.095	3.225	61.275	49.02	5.16	7.095	-14.835	19.995	1.935	-0.645	5.16	5.805	-2.58	-3.225	-6.45	-2.58	-0.645	-4.515	-3.87	-1.29	19.35	-1.935	0	5.805	-0.645	-2.58
36	-3.87	-1.935	-9.675	3.225	58.695	54.825	3.87	-1.29	-23.22	25.8	2.58	-2.58	3.87	8.385	0	2.58	-6.45	-2.58	-6.45	-9.675	-3.87	-2.58	21.93	-2.58	1.29	3.225	-0.645	-3.225
40	-4.515	0.645	-10.32	8.385	56.115	57.405	3.87	-1.29	-19.995	19.35	8.385	-6.45	5.805	10.965	-2.58	-0.645	-5.16	-1.935	-0.645	-7.095	-7.095	0.645	31.605	9.03	1.29	4.515	0	0.645
44	-4.515	0.645	-10.32	8.385	53.535	63.855	3.87	-1.29	-25.155	13.545	8.385	-5.16	3.87	10.965	-2.58	-2.58	-4.515	-1.935	1.935	-12.255	-7.74	-0.645	32.25	-7.74	1.29	4.515	0	0.645
48	-4.515	1.29	-12.255	7.095	59.34	65.145	3.87	-1.29	-27.735	12.9	8.385	-3.225	-4.515	6.45	-2.58	-2.58	-4.515	-1.935	2.58	-7.095	-5.16	-1.935	36.12	1.935	-3.87	0	0	0.645
52	-4.515	1.29	-12.9	6.45	58.05	74.82	3.87	-1.29	-30.315	14.835	3.225	-7.74	-2.58	0	-3.225	-3.225	-4.515	-2.58	-1.935	-10.965	-4.515	-2.58	30.315	5.16	-3.87	0	1.935	1.935
56	-4.515	1.29	-12.9	6.45	60.63	69.66	3.225	-1.29	-32.895	12.9	-3.87	-10.32	-1.935	1.29	-3.225	0	-4.515	-2.58	-8.385	-13.545	-4.515	-2.58	27.09	16.77	-3.87	0	1.935	1.935
60	-4.515	1.29	-12.9	6.45	60.63	70.305	4.515	6.45	-39.345	7.74	-5.16	-8.385	-4.515	3.87	1.29	3.225	-5.16	-1.29	0	-14.19	1.935	-3.225	30.315	12.255	1.935	1.935	-1.29	4.515
64	-4.515	1.29	-12.9	3.87	54.18	62.565	10.965	6.45	-38.055	14.835	-1.935	-9.03	-4.515	3.87	4.515	0.645	-5.16	-1.29	-1.935	-4.515	3.87	-3.225	27.09	12.255	1.935	1.935	-1.29	4.515
68	-4.515	1.29	-11.61	0.645	35.475	61.275	14.835	9.03	-34.83	8.385	2.58	-10.965	-4.515	3.87	5.16	0.645	-5.16	-1.29	-7.74	-8.385	15.48	-1.29	34.185	10.32	1.935	1.935	-11.61	5.805
72	-3.87	-3.225	-9.675	0.645	4.515	65.145	12.9	6.45	-40.635	10.32	-3.225	-10.32	-4.515	3.87	5.16	0.645	-5.16	-1.29	-7.74	-8.385	21.285	-0.645	35.475	1.29	1.935	1.935	-5.805	6.45
76	-3.87	-3.225	-10.965	2.58	-10.965	69.015	10.965	4.515	-46.44	13.545	-0.645	-7.095	-1.935	3.87	7.74	3.225	-5.16	-1.29	-14.835	-3.87	7.095	7.74	36.12	7.095	6.45	-2.58	-7.095	6.45
80	-3.87	-3.225	-7.095	0.645	-6.45	69.66	10.965	4.515	-41.925	12.255	-5.16	-9.675	-2.58	0.645	7.74	3.225	-12.255	3.87	-14.835	1.29	5.805	3.87	36.765	4.515	5.16	-2.58	-6.45	6.45
84	-3.87	-3.225	-7.74	3.87	-3.87	73.53	10.32	1.29	-54.18	1.29	-5.16	-9.675	6.45	1.29	5.805	-4.515	-7.74	-2.58	0	-3.87	7.095	2.58	36.765	4.515	8.385	2.58	-11.61	7.74
88	-2.58	0	-7.74	3.87	-3.225	74.82	6.45	7.095	-54.18	14.19	-5.16	-9.675	3.87	0	7.095	-1.935	-7.74	0	9.675	-3.225	4.515	4.515	39.99	2.58	8.385	2.58	-5.805	5.16
92	-2.58	0	-7.74	3.87	6.45	73.53	5.805	5.16	-48.375	7.74	-5.16	-9.675	-7.095	4.515	9.675	1.29	-10.965	6.45	7.095	-3.225	10.965	9.675	39.345	5.805	8.385	3.225	-1.935	3.225
96	-2.58	0	-7.74	3.87	0.645	69.015	5.805	2.58	-38.7	8.385	-7.74	3.87	-8.385	1.29	9.675	1.29	-5.805	11.61	3.87	-3.225	12.9	19.995	36.765	6.45	5.805	-0.645	-1.935	3.225
100	-2.58	0	-7.74	3.87	1.29	75.465	3.87	4.515	-15.48	0.645	-4.515	1.29	-8.385	1.29	9.675	1.29	-5.16	3.87	3.225	-3.225	12.255	18.705	36.765	6.45	1.935	0.645	-1.29	3.225
104	-1.935	-3.87	-7.095	-2.58	5.805	78.69	-3.87	10.32	-21.285	7.74	-5.16	-0.645	-1.29	-5.805	7.74	3.87	-5.16	3.87	7.095	-5.16	9.03	16.77	36.12	3.87	1.935	0.645	-7.095	10.32
108	-1.935	-3.87	-6.45	0	5.16	78.69	-5.16	5.805	-34.185	1.935	-12.9	5.16	5.16	-4.515	9.675	3.87	-5.16	3.87	7.74	-5.16	10.965	19.995	36.12	3.87	0.645	3.87	-14.19	4.515
112	-1.29	-3.87	-6.45	0	8.385	76.11	-13.545	5.805	-34.185	-2.58	-9.675	-5.805	5.805	-3.87	7.095	-5.805	-4.515	3.87	4.515	0.645	11.61	20.64	29.67	12.9	-1.935	6.45	-14.19	3.87
116	-1.29	-4.515	-6.45	0	10.965	73.53	-13.545	5.805	-30.96	3.87	-12.255	-10.32	18.705	-20.64	9.03	-4.515	-5.805	4.515	4.515	-5.16	12.255	22.575	28.38	13.545	-3.225	8.385	-14.835	1.935
120	-1.29	-4.515	-6.45	0	8.385	78.045	-14.835	9.03	-30.315	2.58	-14.19	-16.77	28.38	-7.095	9.03	-4.515	-7.095	3.87	2.58	-15.48	16.77	25.8	32.25	22.575	-3.225	8.385	-10.32	7.095
