# Supplementary material for: Microtubules restrict F-actin polymerization to the immune synapse via GEF-H1 to maintain polarity in lymphocytes
Source: eLife journal article supplement (doi:10.7554/elife.78330), 2022-09-16
Supplement: supp [file Figure8H_I.xlsx]

## Sheet: 8H
Confinement Ratio
DMSO	Noco
0.25293	0.0888747
0.841067	0.0642474
0.22145	0.269952
0.285078	0.0853
0.199618	0.0905936
0.253384	0.0843744
0.165144	0.0613341
0.360474	0.195827
0.54398	0.369133
0.684405	0.488569
0.472182	0.108572
0.328986	0.546431
0.0612657	0.332781
0.289765	0.10377
0.378083	0.0563316
0.483727	0.0688072
0.859767	0.27159
0.390544	0.0349165
0.637391	0.295646
0.595928	0.0176078
0.569541	0.157191
0.72398	0.235025
0.116408	0.133089
0.329311	0.173466
0.727982	0.0155141
0.415618	0.077968
0.843303	0.702306
0.0793417	0.229725
0.275107	0.861975
0.055431	0.203224
0.0381347	0.481983
0.283372	0.659686
0.0824361	0.189799
0.594702	0.292818
0.485018	0.455334
0.213381	0.234125
0.249792	0.168322
0.542728	0.659643
0	0.515417
0.124346	0.183636
0.308073	0.0607989
0.51361	0.315327
0.15253	0.480876
0.0206142	0.578409
0.190744	0.097719
0.44868	0.185371
1	0.341893
0.995299	0.488932
0.0484653	0.124891
0.92621	0.186653
0.0283065	0.0886915
0.790569	0.0953512
0.707107	0.0821303
1	0.590914
0.0829345	0.257109
0.303784	0.229311
1	0.0956543
0.323929	0.0431966
0.071609	0.470741
0.088813	0.664648
0.562159	0.139534
0.869942	0.162737
0.683988	0.630348
0.114565	0.182997
1	0.593732
0.241906	0.6184
0.589015	0.216994
0.82988	0.0876411
0.92621	0.0529211
	0.24401
	0.240381
	0.305086
	0.0748325
	0.0651492
	0.143152
	0.0422565
	0.217298
	0.15079
	0.0766411
	0.0499695
	0.149802
	0.0633309
	0.087602
	0.0519303
	0.0934348
	0.403748
	0.305928
	0.106084
	0.0699704
	0.158006
	0.0427415
	0.159373
	0.164485
	0.139015
	0.308426
	0.0769388
	0.41077
	0.0401989
	0.193511
	0.0758156
	0.0696237
	0.0429895
	0.0697924
	0.591436
	0.553012
	0.0401904
	0.0230659
	0.15333
	0.175944
	0.674483
	0.328701
	0.301126
	0.737761
	0.0475023
	0.0498922
	0.132569
	0.578745
	0.332184
	0.711707
	0.102606
	0.0699239

## Sheet: 8I
Mean directional change rate
DMSO	Noco
0.330413	0.255558
0.162949	0.214723
0.255581	0.222671
0.26256	0.241844
0.292744	0.306789
0.143367	0.234935
0.229798	0.380349
0.219502	0.250217
0.197195	0.324788
0.248033	0.262739
0.278475	0.354721
0.33375	0.228891
0.297905	0.38495
0.276763	0.410772
0.294872	0.171851
0.0373732	0.232921
0.163526	0.356666
0.215212	0.323266
0.231024	0.255592
0.258724	0.369745
0.291042	0.335954
0.100016	0.114969
0.244027	0.312388
0.147906	0.28046
0.227192	0.323964
0.296744	0.367196
0.241178	0.142857
0.275369	0.206837
0.187612	0.129073
0.258493	0.292645
0.155176	0.300484
0.216061	0.183712
0.294527	0.325269
0.119506	0.33767
0.0777449	0.218144
0.273325	0.340592
0.263522	0.288995
0.237129	0.233423
0.283615	0.250633
0.2568	0.399551
0.34773	0.317753
0.205306	0.311386
0.126965	0.258088
0.174906	0.223417
0.124129	0.241473
0.158355	0.338387
0.0564223	0.286897
0.0712265	0.279875
0.308506	0.323964
0.0338534	0.225379
0.205608	0.27793
0.0451378	0.337088
0.0451378	0.407188
0.0159073	0.189981
0.199265	0.319483
0.223615	0.350182
0.0451378	0.196969
0.06592	0.362202
0.109703	0.315927
0.266631	0.262318
0.228624	0.29515
0.113629	0.317529
0.169066	0.242876
0.0782869	0.257216
0.0338534	0.205051
0.127954	0.191978
0.112845	0.296456
0.160463	0.316863
0.0789912	0.373738
	0.295831
	0.318497
	0.332554
	0.313634
	0.266828
	0.349402
	0.376123
	0.339873
	0.316655
	0.38318
	0.370451
	0.28969
	0.410042
	0.415153
	0.339874
	0.331819
	0.243219
	0.334381
	0.377523
	0.429409
	0.28061
	0.350202
	0.345519
	0.318961
	0.326658
	0.245732
	0.350641
	0.337716
	0.390133
	0.293833
	0.368015
	0.350674
	0.379225
	0.351593
	0.246144
	0.295782
	0.389072
	0.419606
	0.295738
	0.412323
	0.2075
	0.364874
	0.290644
	0.281894
	0.36942
	0.328784
	0.332641
	0.224342
	0.254816
	0.248441
	0.389706
	0.323686
